# Supplementary material for: Visible-light-induced photoacid catalysis: application in glycosylation with O-glycosyl trichloroacetimidates
Source: Royal Society of Chemistry journal article supplement (doi:10.1039/d1cc04887b), 2021-01-01

*Supporting Information*

**Visible-Light-Induced Photoacid Catalysis: Application in  
Glycosylation with *O*-Glycosyl Trichloroacetimidates**

Gaoyuan Zhao, Juncheng Li, and Ting Wang\*

Department of Chemistry, University at Albany, State University of New York, 1400  
Washington Ave., Albany, NY 12222, United State

twang3@albany.edu

*Table of Contents*

|                                                                  |               |
|------------------------------------------------------------------|---------------|
| <b>1. General Information.....</b>                               | <b>2</b>      |
| <b>2. Experimental Procedures and Characterization Data.....</b> | <b>2-23</b>   |
| <b>3. References.....</b>                                        | <b>23</b>     |
| <b>4. Copies of the Related NMR Spectra .....</b>                | <b>24-103</b> |

## 1. General Information

All commercially available chemicals were used without further purification unless otherwise noted. Reactions were monitored by thin layer chromatography using TLC silica gel 60-F<sub>254</sub> plates. TLC plates were visualized by UV fluorescence (254 nm) or stained by Cerium Molybdate followed by heating. Purification of the reaction products was carried out by column chromatography using Siliaflash-P60 (40-63  $\mu\text{m}$ ) silica gel available from Silicycle. <sup>1</sup>H-NMR spectra were recorded on a BRUKER AV-400 (400 MHz) and <sup>13</sup>C-NMR spectra were recorded on a BRUKER AV-400 or AV-600 (100 MHz or 150 MHz). Data for <sup>1</sup>H-NMR are recorded as follows: chemical shift ( $\delta$ , ppm), multiplicity (s = singlet, d = doublet, t = triplet, m = multiplet, q = quartet), coupling constant(s) in Hz and integration. Data for <sup>13</sup>C-NMR are reported in terms of chemical shift ( $\delta$ , ppm). IR spectra were recorded on a PerkinElmer Spectrum Two IR spectrometer and only major peaks were reported in  $\text{cm}^{-1}$ . High-resolution mass spectral analysis (HRMS) data were obtained using Agilent Technologies 6530 Accurate Mass Q-TOF LC/MS. Irradiation of photochemical reactions was carried out using two 12W PAR38 Blue LED flood lamps from ABi LED lighting. Yields refer to chromatographically and spectroscopically purified compounds.

## 2. Experimental Procedures and Characterization Data

### Preparation of Substrates

All glycosyl donors and acceptors were prepared according to the literature procedure.<sup>1-10</sup>

### General Glycosylation Procedure

To an oven-dried 1.5 dram vial equipped with a stirbar were added 0.2 mmol glycosyl acceptor, 0.24 mmol glycosyl donor, 0.004 mmol PhSSPh, 0.002 mmol Eosin Y free acid and 0.5 mL dry dichloromethane. The vial was sealed with a Teflon cap and stirred at room temperature under irradiation with blue LEDs. Upon completion of the reaction (6-8 hours), the solution was concentrated in vacuo, and the residue was purified by flash column chromatography to afford glycosides.

### Compound 17

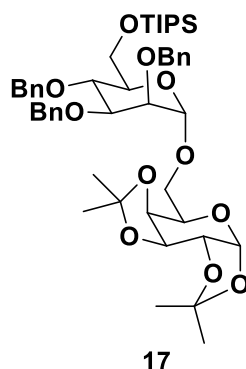

Following the General Glycosylation Procedure: After purification, **17** was obtained as a colourless oil (148 mg, 87%,  $\alpha/\beta = 11:1$ ).

$^1\text{H}$  NMR (400 MHz,  $\text{CDCl}_3$ )  $\delta$  7.42 – 7.31 (m, 15H), 5.56 (d,  $J = 4.8$  Hz, 1H), 5.02 (s, 1H), 4.94 (d,  $J = 10.8$  Hz, 1H), 4.78 – 4.58 (m, 6H), 4.37 – 4.32 (m, 1H), 4.19 (d,  $J = 7.9$  Hz, 1H), 4.10 – 3.92 (m, 5H), 3.86 (s, 1H), 3.77 (dd,  $J = 10.4, 7.3$  Hz, 1H), 3.72 – 3.65 (m, 2H), 1.53 (s, 3H), 1.47 (s, 3H), 1.36 (s, 6H), 1.10 – 1.09 (m, 21H).

$^{13}\text{C}$  NMR (100 MHz,  $\text{CDCl}_3$ )  $\delta$  138.8, 138.7, 138.5, 128.3, 128.2, 128.1, 128.0, 127.6, 127.6, 127.5, 127.4, 127.3, 109.3, 108.5, 96.5, 96.3, 80.1, 75.1, 74.9, 74.7, 73.6, 72.2, 72.0, 70.9, 70.7, 70.6, 65.0, 64.7, 62.9, 26.1, 25.9, 24.9, 24.5, 18.0, 18.0, 12.0;

IR ( $\text{CH}_2\text{Cl}_2$ ,  $\text{cm}^{-1}$ ) 2939, 2665, 1725, 1496, 1454, 1381, 1255, 1210, 1096, 1066, 1027, 882, 735.;

ESI HRMS calcd for  $\text{C}_{48}\text{H}_{68}\text{NaO}_{11}\text{Si}$  [ $\text{M} + \text{Na}$ ] $^+$  871.4423, found 871.4427.

### Compound 18

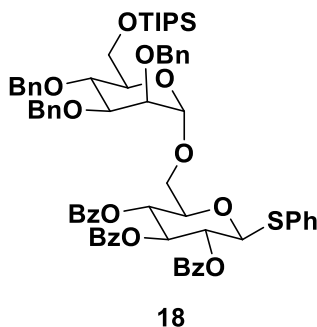

Following the General Glycosylation Procedure: After purification, **18** was obtained as a white solid (211 mg, 90%,  $\alpha/\beta = 21:1$ ).

$^1\text{H}$  NMR (400 MHz,  $\text{CDCl}_3$ )  $\delta$  8.07 (d,  $J = 7.5$  Hz, 2H), 7.97 (d,  $J = 7.6$  Hz, 2H), 7.89 (d,  $J = 7.5$  Hz, 2H), 7.57 (dd,  $J = 9.9, 4.3$  Hz, 3H), 7.50 – 7.28 (m, 26H), 5.97 (t,  $J = 9.6$  Hz, 1H), 5.64 (t,  $J = 9.6$  Hz, 1H), 5.57 (t,  $J = 9.7$  Hz, 1H), 5.09 (d,  $J = 10.0$  Hz, 1H), 5.01 (d,  $J = 11.0$  Hz, 1H), 4.96 (s, 1H), 4.81 – 4.69 (m, 3H), 4.55 (q,  $J = 11.6$  Hz, 2H), 4.05 (t,  $J = 9.6$  Hz, 3H), 3.94 (dd,  $J = 13.8, 2.6$  Hz, 3H), 3.75 (d,  $J = 9.8$  Hz, 2H), 3.64 (d,  $J = 9.7$  Hz, 1H), 1.14 (s, 21H).

$^{13}\text{C}$  NMR (100 MHz,  $\text{CDCl}_3$ )  $\delta$  165.8, 165.0, 165.0, 138.8, 138.6, 138.5, 133.2, 133.1, 131.7, 129.7, 129.6, 129.1, 128.9, 128.7, 128.3, 128.2, 128.1, 128.1, 127.9, 127.8, 127.6, 127.5, 127.4,

127.3, 97.9, 86.3, 80.0, 76.9, 74.9, 74.4, 74.2, 73.5, 72.5, 72.1, 70.7, 69.9, 66.4, 62.9, 18.1, 18.0, 12.0.

IR (CH<sub>2</sub>Cl<sub>2</sub>, cm<sup>-1</sup>) 2941, 2865, 1733, 1601, 1584, 1495, 1452, 1315, 1276, 1263, 1089, 1067, 1026, 882, 733, 706.;

ESI HRMS calcd for C<sub>69</sub>H<sub>76</sub>NaO<sub>13</sub>SSi [M + Na]<sup>+</sup> 1195.4668, found 1195.4669.

### Compound 19

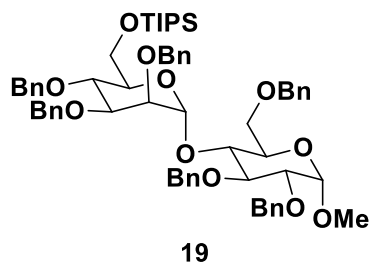

Following the General Glycosylation Procedure: After purification, **19** was obtained as a white solid (132 mg, 63%,  $\alpha/\beta = 18:1$ ).

<sup>1</sup>H NMR (400 MHz, CDCl<sub>3</sub>)  $\delta$  7.33 – 7.17 (m, 30H), 5.28 (s, 1H), 5.08 (d,  $J = 11.4$  Hz, 1H), 4.91 (d,  $J = 10.8$  Hz, 1H), 4.72 -4.58 (m, 7H), 4.50 (t,  $J = 12.3$  Hz, 2H), 4.37 (d,  $J = 12.2$  Hz, 1H), 4.26 (d,  $J = 12.2$  Hz, 1H), 4.06 (d,  $J = 9.5$  Hz, 1H), 3.93 – 3.73 (m, 9H), 3.66 (d,  $J = 8.7$  Hz, 1H), 3.55 (dd,  $J = 9.5, 2.6$  Hz, 1H), 3.41 (s, 3H), 1.04 (s, 21H).

<sup>13</sup>C NMR (125 MHz, CDCl<sub>3</sub>)  $\delta$  138.9, 138.8, 138.7, 138.7, 138.3, 137.9, 128.4, 128.3, 128.3, 128.2, 128.1, 128.0, 127.9, 127.9, 127.6, 127.5, 127.4, 127.4, 127.3, 127.1, 127.0, 126.7, 100.1, 97.7, 81.5, 80.0, 79.9, 76.2, 75.0, 74.4, 74.3, 73.3, 73.2, 72.1, 72.0, 69.9, 69.4, 62.8, 55.2, 18.0, 17.9, 12.0.;

IR (CH<sub>2</sub>Cl<sub>2</sub>, cm<sup>-1</sup>) 2922, 2864, 1732, 1496, 1453, 1360, 1098, 1045, 1027, 882, 733, 696.;

ESI HRMS calcd for C<sub>64</sub>H<sub>80</sub>NaO<sub>11</sub>Si [M + Na]<sup>+</sup> 1075.5362, found 1075.5367.

### Compound 20

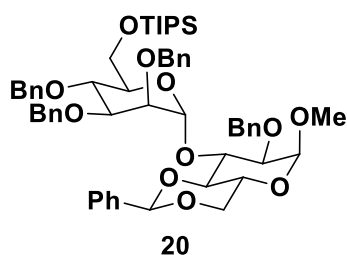

Following the General Glycosylation Procedure: After purification, **20** was obtained as a colourless oil (131 mg, 86%,  $\alpha/\beta = 18:1$ ).

<sup>1</sup>H NMR (400 MHz, CDCl<sub>3</sub>)  $\delta$  7.51 (dd,  $J = 7.1, 2.3$  Hz, 2H), 7.49 – 7.15 (m, 23H), 5.52 (s, 1H), 5.43 (s, 1H), 4.95 (d,  $J = 11.0$  Hz, 1H), 4.79 -4.3 (m, 3H), 4.68 (d,  $J = 4.2$  Hz, 2H), 4.50 (d,  $J = 11.8$  Hz, 1H), 4.47 – 4.35 (m, 2H), 4.24 (ddd,  $J = 14.8, 9.9, 5.2$  Hz, 3H), 4.05 – 3.75 (m,

6H), 3.69 (d,  $J = 10.2$  Hz, 1H), 3.51 (t,  $J = 9.4$  Hz, 1H), 3.44 (d,  $J = 3.6$  Hz, 1H), 3.41 (s, 3H), 1.08 (s, 21H).

$^{13}\text{C}$  NMR (125 MHz,  $\text{CDCl}_3$ )  $\delta$  139.5, 138.9, 138.6, 137.8, 137.2, 129.2, 128.4, 128.4, 128.3, 128.2, 128.1, 128.0, 127.9, 127.8, 127.7, 127.7, 127.6, 127.4, 127.3, 127.2, 127.0, 126.1, 101.6, 99.0, 97.8, 82.8, 79.5, 78.1, 75.0, 74.8, 74.3, 73.7, 73.2, 71.8, 71.5, 69.1, 62.7, 61.8, 18.1, 18.0, 12.1.;

IR ( $\text{CH}_2\text{Cl}_2$ ,  $\text{cm}^{-1}$ ) 2936, 1703, 1496, 1453, 1365, 1280, 1209, 1087, 1045, 1026, 992, 912, 881, 733, 695.;

ESI HRMS calcd for  $\text{C}_{57}\text{H}_{72}\text{NaO}_{11}\text{Si}$  [ $\text{M} + \text{Na}$ ] $^+$  983.4736, found 983.4746.

### Compound 21

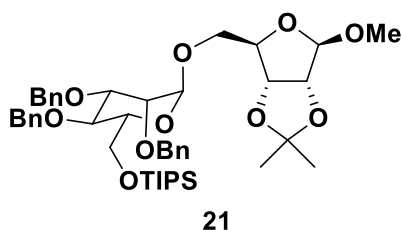

Following the General Glycosylation Procedure: After purification, **21** was obtained as a colourless oil (130 mg, 82%,  $\alpha/\beta = 13:1$ ).

Data for  $\alpha$ :

$^1\text{H}$  NMR (400 MHz,  $\text{CDCl}_3$ )  $\delta$  7.40 – 7.30 (m, 15H), 4.96 (d,  $J = 10.9$  Hz, 2H), 4.86 (s, 1H), 4.79 (d,  $J = 12.4$  Hz, 1H), 4.74 – 4.66 (m, 4H), 4.64 (d,  $J = 5.9$  Hz, 1H), 4.57 (d,  $J = 5.9$  Hz, 1H), 4.31 (dd,  $J = 8.2, 5.5$  Hz, 1H), 3.97 (q,  $J = 10.5$  Hz, 4H), 3.81 (s, 1H), 3.76 (dd,  $J = 10.1, 5.3$  Hz, 1H), 3.69 – 3.64 (m, 1H), 3.37 (t,  $J = 9.5$  Hz, 1H), 3.29 (s, 3H), 1.52 (s, 3H), 1.36 (s, 3H), 1.10 (s, 21H).

$^{13}\text{C}$  NMR (100 MHz,  $\text{CDCl}_3$ )  $\delta$  138.7, 138.6, 138.5, 128.4, 128.3, 128.3, 128.1, 127.7, 127.6, 127.5, 127.5, 112.3, 109.4, 98.2, 85.3, 84.8, 82.2, 80.2, 75.2, 75.1, 74.8, 73.8, 72.6, 72.3, 68.1, 54.8, 26.5, 25.1, 18.0, 18.0, 12.0.;

IR ( $\text{CH}_2\text{Cl}_2$ ,  $\text{cm}^{-1}$ ) 2939, 2864, 1730, 1496, 1454, 1381, 1370, 1272, 1209, 1093, 1047, 1027, 1013, 870, 734, 696.;

ESI HRMS calcd for  $\text{C}_{45}\text{H}_{64}\text{NaO}_{10}\text{Si}$  [ $\text{M} + \text{Na}$ ] $^+$  815.4166, found 815.4171.

Data for  $\beta$ :

$^1\text{H}$  NMR (400 MHz,  $\text{CDCl}_3$ )  $\delta$  7.49 (d,  $J = 7.1$  Hz, 2H), 7.32 – 7.26 (m, 13H), 4.96 (dd,  $J = 11.4, 4.4$  Hz, 3H), 4.86 (d,  $J = 12.3$  Hz, 1H), 4.73 (d,  $J = 5.9$  Hz, 1H), 4.66 (d,  $J = 10.8$  Hz, 1H), 4.62 – 4.51 (m, 3H), 4.41 (s, 1H), 4.34 (dd,  $J = 9.1, 6.1$  Hz, 1H), 4.04 – 3.85 (m, 5H), 3.55 – 3.45 (m, 2H), 3.28 (s, 4H), 1.51 (s, 3H), 1.31 (s, 3H), 1.08 (s, 21H).

$^{13}\text{C}$  NMR (100 MHz,  $\text{CDCl}_3$ )  $\delta$  138.9, 138.5, 138.2, 128.4, 128.1, 128.0, 127.6, 127.6, 127.2, 112.2, 109.4, 101.2, 85.1, 84.9, 82.2, 82.1, 75.2, 74.6, 74.0, 73.8, 71.5, 69.1, 62.9, 54.7, 26.4, 24.8, 17.9, 12.0.;

IR ( $\text{CH}_2\text{Cl}_2$ ,  $\text{cm}^{-1}$ ) 2939, 2864, 1454, 1369, 1107, 1063, 871, 736, 696.;

ESI HRMS calcd for C<sub>45</sub>H<sub>64</sub>NaO<sub>10</sub>Si [M + Na]<sup>+</sup> 815.4166, found 815.4171.

### Compound 22

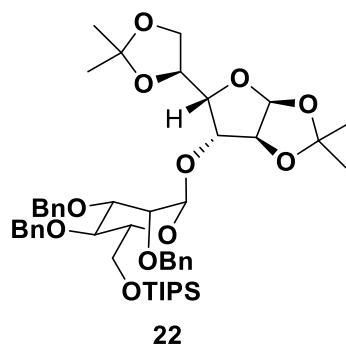

Following the General Glycosylation Procedure: After purification, **22** was obtained as a colourless oil (137 mg, 81%,  $\alpha/\beta = 12:1$ ).

<sup>1</sup>H NMR (400 MHz, CDCl<sub>3</sub>)  $\delta$  7.37 – 7.30 (m, 15H), 5.80 (d,  $J = 3.0$  Hz, 1H), 5.18 (s, 1H), 4.94 (d,  $J = 10.8$  Hz, 1H), 4.68 – 4.57 (m, 5H), 4.27 (s, 1H), 4.11 – 3.93 (m, 8H), 3.85 (d,  $J = 9.5$  Hz, 1H), 3.76 (s, 1H), 3.68 (dd,  $J = 9.1, 5.2$  Hz, 1H), 1.49 (s, 3H), 1.41 (s, 3H), 1.33 (s, 3H), 1.28 (s, 3H), 1.09 (s, 21H).

<sup>13</sup>C NMR (125 MHz, CDCl<sub>3</sub>)  $\delta$  138.5, 138.4, 138.3, 128.4, 128.3, 128.3, 128.2, 127.8, 127.7, 127.6, 127.5, 111.9, 109.2, 105.3, 98.7, 83.9, 81.5, 80.3, 79.6, 75.3, 74.7, 74.7, 74.5, 72.5, 72.2, 72.1, 67.7, 63.3, 26.9, 26.8, 26.2, 25.5, 18.0, 18.0, 12.0.;

IR (CH<sub>2</sub>Cl<sub>2</sub>, cm<sup>-1</sup>) 2939, 2865, 1496, 1454, 1381, 1371, 1250, 1214, 1164, 1027, 1015, 916, 881, 844, 734, 696.;

ESI HRMS calcd for C<sub>48</sub>H<sub>68</sub>NaO<sub>11</sub>Si [M + Na]<sup>+</sup> 871.4423, found 871.4432.

### Compound 23

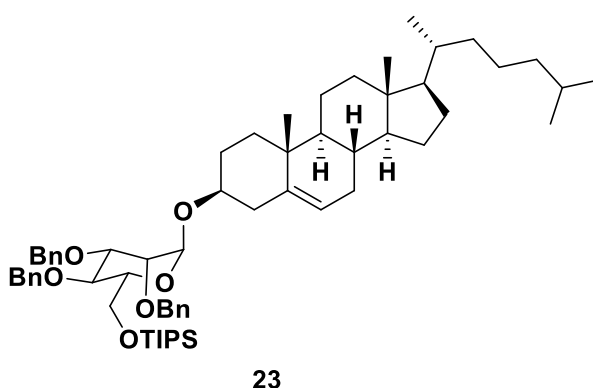

Following the General Glycosylation Procedure: After purification, **23** was obtained as a colourless oil (154 mg, 79%,  $\alpha/\beta = 4:1$ ).

Data for  $\alpha$ :

<sup>1</sup>H NMR (400 MHz, CDCl<sub>3</sub>)  $\delta$  7.39 – 7.27 (m, 15H), 5.30 (d,  $J = 4.3$  Hz, 1H), 5.01 (s, 1H), 4.93 (d,  $J = 10.8$  Hz, 1H), 4.77 (d,  $J = 12.4$  Hz, 1H), 4.66 (dd,  $J = 19.9, 12.3$  Hz, 4H), 3.97 (dd,  $J =$

9.5, 3.2 Hz, 2H), 3.93 – 3.86 (m, 2H), 3.76 (s, 1H), 3.74 – 3.68 (m, 1H), 3.57 – 3.47 (m, 1H), 2.26 (d,  $J = 11.4$  Hz, 2H), 2.00 (t,  $J = 17.6$  Hz, 2H), 1.83 (d,  $J = 10.4$  Hz, 3H), 1.57 – 1.25 (m, 11H), 1.22 – 0.97 (m, 34H), 0.93 (d,  $J = 6.5$  Hz, 4H), 0.88 (dd,  $J = 6.6, 1.6$  Hz, 7H), 0.69 (s, 3H).

$^{13}\text{C}$  NMR (100 MHz,  $\text{CDCl}_3$ )  $\delta$  140.5, 138.7, 138.6, 138.6, 128.3, 128.3, 128.2, 128.1, 127.7, 127.6, 127.4, 121.7, 94.6, 80.5, 75.5, 75.2, 75.1, 73.5, 72.5, 72.1, 63.4, 56.8, 56.1, 50.1, 42.3, 39.7, 39.5, 36.9, 36.7, 36.2, 35.8, 31.9, 31.8, 28.2, 28.0, 27.1, 24.3, 23.8, 22.8, 22.5, 21.0, 19.3, 18.7, 18.1, 18.0, 12.0, 11.8.;

IR ( $\text{CH}_2\text{Cl}_2$ ,  $\text{cm}^{-1}$ ) 2936, 2864, 1705, 1496, 1454, 1364, 1255, 1205, 1096, 1049, 1027, 882, 733, 695.;

ESI HRMS calcd for  $\text{C}_{63}\text{H}_{94}\text{NaO}_6\text{Si}$   $[\text{M} + \text{Na}]^+$  997.6717, found 997.6698.

Data for  $\beta$ :

$^1\text{H}$  NMR (400 MHz,  $\text{CDCl}_3$ )  $\delta$  7.49 (d,  $J = 6.8$  Hz, 2H), 7.31 – 7.27 (m, 13H), 5.34 (s, 1H), 4.93 (dt,  $J = 21.2, 12.5$  Hz, 3H), 4.72 – 4.45 (m, 4H), 3.99 (d,  $J = 10.8$  Hz, 1H), 3.92 – 3.79 (m, 3H), 3.66 – 3.48 (m, 2H), 3.33 – 3.22 (m, 1H), 2.26 (dt,  $J = 24.2, 10.8$  Hz, 2H), 2.00 (t,  $J = 15.9$  Hz, 3H), 1.83 (d,  $J = 13.2$  Hz, 2H), 1.64 – 1.25 (m, 12H), 1.22 – 0.99 (m, 33H), 0.93 (d,  $J = 6.5$  Hz, 4H), 0.88 (dd,  $J = 6.6, 1.5$  Hz, 7H), 0.69 (s, 3H).

$^{13}\text{C}$  NMR (100 MHz,  $\text{CDCl}_3$ )  $\delta$  140.8, 139.2, 138.7, 138.4, 128.3, 128.1, 127.9, 127.6, 127.5, 127.2, 121.7, 99.5, 82.4, 78.1, 75.1, 74.9, 74.3, 73.6, 71.3, 63.2, 56.7, 56.1, 50.2, 42.3, 39.8, 39.5, 38.8, 37.3, 36.8, 36.2, 35.8, 32.0, 31.9, 29.7, 28.2, 28.0, 24.3, 23.8, 22.8, 22.5, 21.0, 19.4, 18.7, 18.0, 18.0, 12.0, 11.8.;

IR ( $\text{CH}_2\text{Cl}_2$ ,  $\text{cm}^{-1}$ ) 2937, 2864, 1729, 1496, 1454, 1364, 1105, 1065, 1027, 882, 733, 695.;

ESI HRMS calcd for  $\text{C}_{63}\text{H}_{94}\text{NaO}_6\text{Si}$   $[\text{M} + \text{Na}]^+$  997.6717, found 997.6698.

## Compound 24

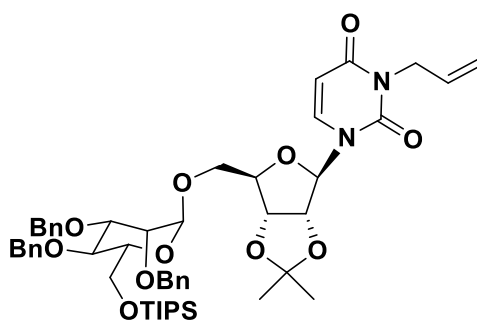

24

Following the General Glycosylation Procedure: After purification, **24** was obtained as a colourless oil (158 mg, 87%,  $\alpha/\beta = 27:1$ ).

$^1\text{H}$  NMR (400 MHz,  $\text{CDCl}_3$ )  $\delta$  7.41 – 7.27 (m, 15H), 5.89 (dq,  $J = 10.6, 5.9$  Hz, 1H), 5.82 (s, 1H), 5.50 (d,  $J = 8.1$  Hz, 1H), 5.29 (d,  $J = 17.1$  Hz, 1H), 5.18 (d,  $J = 10.2$  Hz, 1H), 4.95 (d,  $J = 10.8$  Hz, 1H), 4.86 (s, 1H), 4.79 (d,  $J = 12.4$  Hz, 1H), 4.73 – 4.59 (m, 7H), 4.59 – 4.52 (m,

2H), 4.41 (s, 1H), 4.06 – 3.85 (m, 4H), 3.76 (d,  $J = 9.4$  Hz, 1H), 3.67 (s, 1H), 3.60 (d,  $J = 10.5$  Hz, 1H), 3.54 (d,  $J = 5.4$  Hz, 1H), 1.60 (s, 3H), 1.37 (s, 3H), 1.09 (s, 21H).

$^{13}\text{C}$  NMR (100 MHz,  $\text{CDCl}_3$ )  $\delta$  162.0, 150.4, 138.3, 138.2, 138.0, 131.2, 128.3, 128.1, 127.7, 127.5, 118.3, 114.0, 101.2, 97.9, 93.9, 85.3, 85.1, 80.7, 79.5, 75.2, 74.6, 74.4, 74.2, 72.6, 72.0, 66.9, 62.8, 42.9, 28.0, 25.3, 18.0, 17.9, 11.9;

IR ( $\text{CH}_2\text{Cl}_2$ ,  $\text{cm}^{-1}$ ) 2941, 2865, 1710, 1665, 1496, 1453, 1383, 1336, 1266, 1210, 1070, 1027, 881, 805, 733, 697.;

ESI HRMS calcd for  $\text{C}_{51}\text{H}_{68}\text{N}_2\text{NaO}_{11}\text{Si}$  [ $\text{M} + \text{Na}$ ] $^+$  935.4485, found 935.4487.

### Compound 25

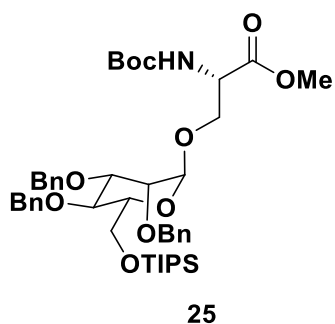

Following the General Glycosylation Procedure: After purification, **25** was obtained as a colourless oil (140 mg, 87%,  $\alpha$  only).

$^1\text{H}$  NMR (400 MHz,  $\text{CDCl}_3$ )  $\delta$  7.38 – 7.31 (m, 15H), 5.25 (d,  $J = 7.9$  Hz, 1H), 4.91 (d,  $J = 10.9$  Hz, 1H), 4.76 – 4.62 (m, 6H), 4.46 (d,  $J = 8.1$  Hz, 1H), 4.04 – 3.83 (m, 6H), 3.68 – 3.66 (m, 4H), 3.57 (d,  $J = 9.4$  Hz, 1H), 1.47 (s, 9H), 1.09 (s, 21H).

$^{13}\text{C}$  NMR (100 MHz,  $\text{CDCl}_3$ )  $\delta$  170.9, 155.4, 138.6, 138.5, 138.4, 128.3, 128.2, 128.0, 127.8, 127.6, 127.5, 98.5, 80.1, 79.7, 75.0, 74.5, 73.9, 72.6, 72.4, 68.0, 62.9, 53.8, 52.4, 28.3, 18.0, 17.9, 12.0.;

IR ( $\text{CH}_2\text{Cl}_2$ ,  $\text{cm}^{-1}$ ) 2941, 2865, 1749, 1715, 1496, 1454, 1208, 1161, 1103, 1055, 1027, 881, 733, 696.;

ESI HRMS calcd for  $\text{C}_{45}\text{H}_{65}\text{NNaO}_{10}\text{Si}$  [ $\text{M} + \text{Na}$ ] $^+$  830.4270, found 830.4280.

### Compound 26

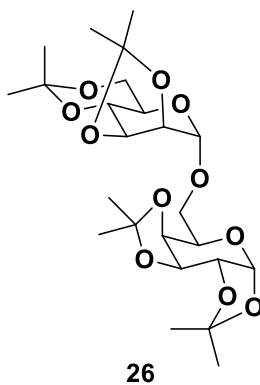



Following the General Glycosylation Procedure: After purification, **26** was obtained as a colourless oil (90 mg, 90%,  $\alpha/\beta > 30:1$ ).

$^1\text{H NMR}$  (500 MHz,  $\text{CDCl}_3$ )  $\delta$  5.55 (d,  $J = 5.0$  Hz, 1H), 5.04 (s, 1H), 4.80 (dd,  $J = 5.9, 3.6$  Hz, 1H), 4.65 – 4.61 (m, 2H), 4.40 (ddd,  $J = 8.0, 6.2, 4.3$  Hz, 1H), 4.33 (dd,  $J = 5.0, 2.5$  Hz, 1H), 4.23 (dd,  $J = 7.9, 1.9$  Hz, 1H), 4.11 (dd,  $J = 8.7, 6.2$  Hz, 1H), 4.06 (dd,  $J = 8.7, 4.3$  Hz, 1H), 3.98 (ddd,  $J = 8.5, 7.4, 2.7$  Hz, 2H), 3.76 (dd,  $J = 10.5, 6.7$  Hz, 1H), 3.66 (dd,  $J = 10.5, 6.8$  Hz, 1H), 1.55 (s, 3H), 1.48 (s, 3H), 1.46 (d,  $J = 1.3$  Hz, 6H), 1.39 (s, 3H), 1.36 (s, 3H), 1.34 (s, 3H).

$\delta^{13}\text{C NMR}$  (125 MHz,  $\text{CDCl}_3$ )  $\delta$  112.5, 109.3, 109.1, 108.5, 106.6, 96.2, 85.0, 80.3, 79.4, 73.0, 70.9, 70.5, 70.4, 66.8, 66.0, 26.8, 26.0, 25.9, 25.8, 25.2, 24.8, 24.5, 24.4.;

IR ( $\text{CH}_2\text{Cl}_2$ ,  $\text{cm}^{-1}$ ) 3366, 3241, 2987, 1733, 1690, 1615, 1456, 1381, 1353, 1210, 1165, 1107, 1068, 1001, 830, 733, 617.;

ESI HRMS calcd for  $\text{C}_{24}\text{H}_{38}\text{NaO}_{11}$   $[\text{M} + \text{Na}]^+$  525.2306, found 525.2306.

### Compound 27

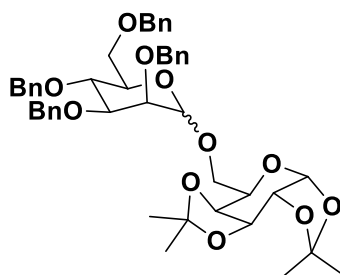

**27**

Following the General Glycosylation Procedure: After purification, **27** was obtained as a colourless oil (128 mg, 82%,  $\alpha/\beta = 3:1$ ).

Data for  $\alpha$ :

$^1\text{H NMR}$  (400 MHz,  $\text{CDCl}_3$ )  $\delta$  7.41 – 7.28 (m, 18H), 7.20 – 7.18 (m, 2H), 5.55 (d,  $J = 5.0$  Hz, 1H), 5.05 (s, 1H), 4.90 (d,  $J = 10.8$  Hz, 1H), 4.77 (s, 2H), 4.71 (d,  $J = 12.2$  Hz, 1H), 4.64 – 4.60 (m, 3H), 4.55 (dd,  $J = 11.3, 8.0$  Hz, 2H), 4.34 (dd,  $J = 4.9, 2.2$  Hz, 1H), 4.19 (d,  $J = 7.9$  Hz, 1H), 4.03 (dt,  $J = 12.8, 7.4$  Hz, 2H), 3.94 (dd,  $J = 9.4, 2.9$  Hz, 1H), 3.83 (dd,  $J = 18.0, 9.1$  Hz, 4H), 3.71 (dt,  $J = 17.3, 5.5$  Hz, 2H), 1.54 (s, 3H), 1.46 (s, 3H), 1.36 (s, 6H).

$^{13}\text{C NMR}$  (100 MHz,  $\text{CDCl}_3$ )  $\delta$  138.6, 138.6, 138.5, 138.4, 128.3, 128.0, 127.8, 127.7, 127.6, 127.5, 127.5, 109.4, 108.6, 97.3, 96.4, 80.1, 75.1, 74.9, 74.7, 73.4, 72.4, 72.0, 70.9, 70.6, 70.6, 69.1, 65.5, 65.4, 26.2, 26.0, 25.0, 24.6.;

IR ( $\text{CH}_2\text{Cl}_2$ ,  $\text{cm}^{-1}$ ) 2916, 1730, 1496, 1453, 1370, 1381, 1254, 1167, 1209, 1096, 1065, 1027, 899, 917, 733, 696.;

ESI HRMS calcd for  $\text{C}_{46}\text{H}_{54}\text{NaO}_{11}$   $[\text{M} + \text{Na}]^+$  805.3558, found 805.3564.

Data for  $\beta$ :

$^1\text{H NMR}$  (400 MHz,  $\text{CDCl}_3$ )  $\delta$  7.52 (d,  $J = 7.5$  Hz, 2H), 7.37 – 7.27 (m, 16H), 7.18 (d,  $J = 7.1$  Hz, 2H), 5.61 (d,  $J = 4.9$  Hz, 1H), 5.03 (d,  $J = 12.4$  Hz, 1H), 4.93 (dd,  $J = 11.7, 5.2$  Hz, 2H),

4.70 – 4.42 (m, 6H), 4.39 – 4.32 (m, 2H), 4.24 (dd,  $J = 7.4, 5.1$  Hz, 2H), 4.13 (d,  $J = 7.9$  Hz, 1H), 4.02 (s, 1H), 3.91 (t,  $J = 9.5$  Hz, 1H), 3.85 – 3.70 (m, 2H), 3.70 – 3.61 (m, 1H), 3.47 (dd,  $J = 14.6, 8.5$  Hz, 2H), 1.50 (s, 3H), 1.46 (s, 3H), 1.35 (s, 3H), 1.34 (s, 3H).

$^{13}\text{C}$  NMR (100 MHz,  $\text{CDCl}_3$ )  $\delta$  138.7, 138.4, 138.1, 128.7, 128.3, 128.2, 128.0, 127.9, 127.6, 127.5, 127.5, 127.4, 109.5, 108.8, 102.4, 96.4, 81.9, 75.8, 75.1, 74.8, 73.6, 73.5, 72.7, 71.7, 71.1, 70.8, 70.5, 69.9, 69.5, 68.1, 26.1, 26.0, 25.1, 24.4.

IR ( $\text{CH}_2\text{Cl}_2$ ,  $\text{cm}^{-1}$ ) 2903, 1726, 1496, 1453, 1371, 1254, 1209, 1098, 1064, 1026, 1003, 899, 735, 696.;

ESI HRMS calcd for  $\text{C}_{46}\text{H}_{54}\text{NaO}_{11}$   $[\text{M} + \text{Na}]^+$  805.3558, found 805.3564.

### Compound 28

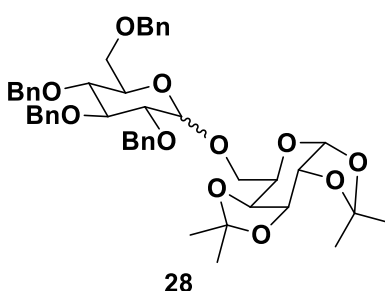

Following the General Glycosylation Procedure: After purification, **28** was obtained as a colourless oil (148 mg, 92%,  $\alpha/\beta = 1.3:1$ ).

Gram scale experiment: To an oven-dried 25ml flask equipped with a stirbar were added 2 mmol glycosyl acceptor, 2.4 mmol glycosyl donor, 0.04 mmol PhSSPh, 0.02 mmol Eosin Y free acid and 10 mL dry dichloromethane. The flask was sealed with a rubber stopper and stirred at room temperature under irradiation with blue LEDs. Upon completion of the reaction (16 hours), the solution was concentrated in vacuo, and the residue was purified by flash column chromatograph to afford glycosides with 1.28 g yield (82%,  $\alpha/\beta = 1.2:1$ ).

$^1\text{H}$  NMR (400 MHz,  $\text{CDCl}_3$ )  $\delta$  7.24 (d,  $J = 5.9$  Hz, 2H), 7.22 – 7.18 (m, 36H), 7.06 (d,  $J = 4.3$  Hz, 4H), 5.50 (d,  $J = 4.9$  Hz, 1H), 5.46 (d,  $J = 5.0$  Hz, 1H), 4.96 (d,  $J = 11.1$  Hz, 1H), 4.89 (dd,  $J = 13.1, 7.4$  Hz, 3H), 4.73 (dt,  $J = 18.5, 9.2$  Hz, 8H), 4.65 (d,  $J = 7.7$  Hz, 3H), 4.54 (d,  $J = 12.1$  Hz, 4H), 4.47 – 4.36 (m, 5H), 4.25 (t,  $J = 5.9$  Hz, 3H), 4.17 (d,  $J = 7.8$  Hz, 1H), 4.08 (dd,  $J = 10.6, 3.3$  Hz, 1H), 4.02 (d,  $J = 7.2$  Hz, 1H), 3.99 – 3.88 (m, 2H), 3.78 – 3.47 (m, 13H), 3.39 (t,  $J = 8.1$  Hz, 2H), 1.46 (s, 3H), 1.43 (s, 3H), 1.38 (s, 6H), 1.24 (d,  $J = 2.0$  Hz, 12H).

$^{13}\text{C}$  NMR (100 MHz,  $\text{CDCl}_3$ )  $\delta$  138.8, 138.6, 138.5, 138.3, 138.2, 138.1, 138.0, 137.9, 128.7, 128.4, 128.4, 128.3, 128.0, 128.0, 128.0, 128.0, 127.9, 127.9, 127.8, 127.8, 127.7, 127.7, 127.6, 109.4, 109.3, 108.7, 104.3, 96.9, 96.3, 96.3, 84.5, 81.9, 81.6, 79.8, 77.6, 77.6, 77.5, 77.2, 76.8, 75.7, 75.0, 74.6, 74.5, 73.5, 73.5, 72.5, 71.4, 70.9, 70.7, 70.6, 70.6, 70.5, 70.2, 69.7, 68.6, 68.3, 67.4, 66.2, 65.8, 26.2, 26.1, 26.1, 26.0, 25.0, 24.9, 24.6, 24.4.

IR (CH<sub>2</sub>Cl<sub>2</sub>, cm<sup>-1</sup>) 2905, 1727, 1597, 1496, 1453, 1371, 1255, 1209, 1164, 1065, 1027, 1000, 918, 898, 823, 734, 696.;

ESI HRMS calcd for C<sub>46</sub>H<sub>54</sub>NaO<sub>11</sub> [M + Na]<sup>+</sup> 805.3558, found 805.3563.

### Compound 29

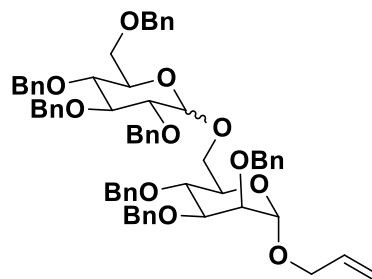

29

Following the General Glycosylation Procedure: After purification, **29** was obtained as a colourless oil (176 mg, 87%,  $\alpha/\beta = 1.5:1$ ).

Data for  $\alpha$ :

<sup>1</sup>H NMR (500 MHz, CDCl<sub>3</sub>)  $\delta$  7.37 – 7.22 (m, 33H), 7.17 – 7.14 (m, 2H), 5.84 – 5.81 (m, 1H), 5.23 (dq,  $J = 17.2, 1.6$  Hz, 2H), 5.14 (dt,  $J = 11.2, 2.4$  Hz, 2H), 4.97 – 4.92 (m, 2H), 4.87 (dd,  $J = 9.3, 6.3$  Hz, 2H), 4.78 (d,  $J = 10.9$  Hz, 1H), 4.72 (d,  $J = 12.0$  Hz, 2H), 4.69 (d,  $J = 4.2$  Hz, 2H), 4.64 (dt,  $J = 11.8, 4.0$  Hz, 4H), 4.49 (d,  $J = 3.9$  Hz, 1H), 4.47 (d,  $J = 5.1$  Hz, 1H), 4.20 – 4.15 (m, 1H), 4.06 – 4.01 (m, 2H), 3.97 (ddd,  $J = 5.9, 5.2, 3.1$  Hz, 1H), 3.94 – 3.83 (m, 5H), 3.77 – 3.64 (m, 3H), 3.58 (dd,  $J = 9.6, 3.5$  Hz, 1H).

<sup>13</sup>C NMR (125 MHz, CDCl<sub>3</sub>)  $\delta$  138.9, 138.7, 138.6, 138.6, 138.5, 138.2, 138.1, 133.8, 128.3, 128.3, 128.3, 128.3, 128.3, 128.2, 128.2, 128.1, 128.0, 127.9, 127.9, 127.9, 127.7, 127.7, 127.6, 127.6, 127.6, 127.5, 127.5, 127.4, 117.4, 96.9, 96.5, 81.7, 80.4, 80.1, 77.7, 75.5, 75.2, 75.1, 74.9, 73.4, 72.8, 72.5, 72.2, 72.0, 70.1, 68.6, 67.7, 66.0.;

IR (CH<sub>2</sub>Cl<sub>2</sub>, cm<sup>-1</sup>) 3029, 2918, 1496, 1453, 1360, 1208, 1090, 1072, 1027, 914, 735, 696.;

ESI HRMS calcd for C<sub>64</sub>H<sub>68</sub>NaO<sub>11</sub> [M + Na]<sup>+</sup> 1035.4654, found 1035.4653.

Data for  $\beta$ :

<sup>1</sup>H NMR (500 MHz, CDCl<sub>3</sub>)  $\delta$  7.40 – 7.18 (m, 35H), 5.79 (dddd,  $J = 17.2, 10.5, 6.1, 4.9$  Hz, 1H), 5.18 (ddd,  $J = 17.2, 3.3, 1.7$  Hz, 1H), 5.13 (ddd,  $J = 10.4, 2.9, 1.3$  Hz, 1H), 5.08 (d,  $J = 11.0$  Hz, 1H), 4.97 (dd,  $J = 7.4, 6.5$  Hz, 2H), 4.87 – 4.78 (m, 3H), 4.72 (d,  $J = 11.6$  Hz, 3H), 4.67 – 4.62 (m, 3H), 4.59 – 4.55 (m, 2H), 4.53 (d,  $J = 11.1$  Hz, 1H), 4.43 (d,  $J = 7.8$  Hz, 1H), 4.29 (dd,  $J = 10.7, 1.9$  Hz, 1H), 4.16 – 4.10 (m, 1H), 4.01 (d,  $J = 9.4$  Hz, 1H), 3.98 (dd,  $J = 9.3, 3.0$  Hz, 1H), 3.93 – 3.83 (m, 3H), 3.81 – 3.70 (m, 3H), 3.69 – 3.59 (m, 2H), 3.53 (dd,  $J = 8.9, 7.9$  Hz, 1H), 3.49 (ddd,  $J = 9.5, 4.7, 2.0$  Hz, 1H).

<sup>13</sup>C NMR (125 MHz, CDCl<sub>3</sub>)  $\delta$  138.7, 138.6, 138.6, 138.3, 138.3, 138.2, 133.7, 128.4, 128.3, 128.3, 128.3, 128.2, 127.9, 127.9, 127.8, 127.7, 127.6, 127.5, 127.4, 117.2, 104.1, 97.0, 84.7, 82.1, 80.3, 78.0, 75.7, 75.0, 75.0, 74.8, 74.7, 73.5, 72.8, 72.1, 71.6, 69.1, 69.0, 67.7.;

IR (CH<sub>2</sub>Cl<sub>2</sub>, cm<sup>-1</sup>) 3029, 2918, 1496, 1453, 1360, 1208, 1069, 1028, 735, 697.;

ESI HRMS calcd for C<sub>64</sub>H<sub>68</sub>NaO<sub>11</sub> [M + Na]<sup>+</sup> 1035.4654, found 1035.4666.

### Compound 30

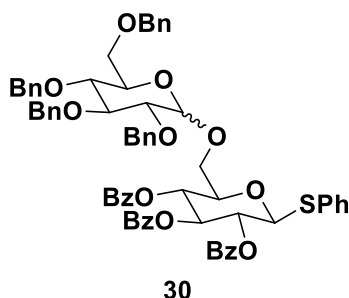

Following the General Glycosylation Procedure: After purification, **30** was obtained as a colourless oil (179 mg, 81%,  $\alpha/\beta = 1.3:1$ ).

Data for  $\alpha$ :

<sup>1</sup>H NMR (500 MHz, CDCl<sub>3</sub>)  $\delta$  8.00 (dd,  $J = 8.4, 1.3$  Hz, 2H), 7.95 (dd,  $J = 8.4, 1.3$  Hz, 2H), 7.81 (dd,  $J = 8.4, 1.3$  Hz, 2H), 7.60 – 7.11 (m, 34H), 5.88 (t,  $J = 9.5$  Hz, 1H), 5.46 (dt,  $J = 12.7, 9.9$  Hz, 2H), 5.01 (d,  $J = 10.1$  Hz, 1H), 4.95 (d,  $J = 10.9$  Hz, 1H), 4.86 – 4.77 (m, 3H), 4.69 (d,  $J = 3.6$  Hz, 1H), 4.63 (d,  $J = 2.2$  Hz, 1H), 4.60 (d,  $J = 2.2$  Hz, 1H), 4.51 (d,  $J = 11.0$  Hz, 1H), 4.44 (d,  $J = 12.1$  Hz, 1H), 4.15 (ddd,  $J = 9.7, 6.1, 1.9$  Hz, 1H), 3.94 (ddd,  $J = 18.4, 14.8, 8.4$  Hz, 3H), 3.73 – 3.61 (m, 3H), 3.59 – 3.53 (m, 2H).

<sup>13</sup>C NMR (125 MHz, CDCl<sub>3</sub>)  $\delta$  165.7, 165.3, 165.0, 138.6, 138.5, 138.2, 138.0, 133.5, 133.3, 133.2, 132.8, 132.4, 129.9, 129.7, 129.3, 129.0, 128.8, 128.8, 128.5, 128.4, 128.4, 127.9, 127.9, 127.8, 127.7, 127.6, 103.9, 85.8, 84.6, 82.3, 78.3, 77.7, 75.7, 74.9, 74.9, 74.8, 74.3, 73.5, 73.3, 70.6, 70.1, 69.6, 68.3, 67.3.;

IR (CH<sub>2</sub>Cl<sub>2</sub>, cm<sup>-1</sup>) 2920, 1733, 1601, 1452, 1278, 1259, 1089, 1069, 1027, 738, 706.;

ESI HRMS calcd for C<sub>67</sub>H<sub>62</sub>NaO<sub>13</sub>S [M + Na]<sup>+</sup> 1129.3803, found 1129.3814.

Data for  $\beta$ :

<sup>1</sup>H NMR (500 MHz, CDCl<sub>3</sub>)  $\delta$  8.00 (dd,  $J = 8.3, 1.1$  Hz, 2H), 7.93 (dd,  $J = 8.3, 1.1$  Hz, 2H), 7.80 (dd,  $J = 8.3, 1.1$  Hz, 2H), 7.64 – 7.21 (m, 32H), 7.16 (dd,  $J = 7.2, 2.2$  Hz, 2H), 5.90 (t,  $J = 9.5$  Hz, 1H), 5.49 (t,  $J = 9.7$  Hz, 1H), 5.42 (t,  $J = 9.8$  Hz, 1H), 5.07 (d,  $J = 10.0$  Hz, 1H), 4.96 (dd,  $J = 12.4, 11.1$  Hz, 2H), 4.83 (d,  $J = 10.8$  Hz, 1H), 4.79 (d,  $J = 10.9$  Hz, 1H), 4.66 (d,  $J = 11.0$  Hz, 1H), 4.55 (d,  $J = 5.5$  Hz, 1H), 4.53 (d,  $J = 4.1$  Hz, 1H), 4.50 (d,  $J = 7.7$  Hz, 1H), 4.45 (d,  $J = 12.2$  Hz, 1H), 4.18 (ddd,  $J = 9.9, 7.6, 2.1$  Hz, 1H), 4.08 (dd,  $J = 11.4, 2.1$  Hz, 1H), 3.93 (dd,  $J = 11.3, 7.7$  Hz, 1H), 3.70 – 3.58 (m, 4H), 3.57 – 3.53 (m, 2H).

<sup>13</sup>C NMR (125 MHz, CDCl<sub>3</sub>)  $\delta$  165.7, 165.4, 165.0, 138.6, 138.1, 133.4, 133.3, 133.2, 132.4, 132.1, 129.9, 129.7, 129.2, 129.1, 128.9, 128.9, 128.8, 128.5, 128.4, 128.3, 128.3, 128.2, 128.2, 128.1, 128.0, 127.9, 127.8, 127.8, 127.7, 127.7, 127.6, 127.5, 127.4, 97.3, 85.8, 84.6, 82.3, 78.3, 77.7, 75.7, 74.9, 74.8, 74.3, 73.5, 70.6, 69.9, 69.0, 68.7.;

IR (CH<sub>2</sub>Cl<sub>2</sub>, cm<sup>-1</sup>) 3031, 2869, 1729, 1601, 1496, 1452, 1361, 1315, 1278, 1260, 1087, 1068, 1027, 825, 708.;

ESI HRMS calcd for C<sub>67</sub>H<sub>62</sub>NaO<sub>13</sub>S [M + Na]<sup>+</sup> 1129.3803, found 1129.3809.

### Compound 31

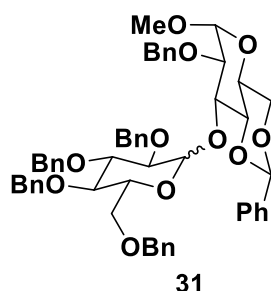

Following the General Glycosylation Procedure: After purification, **31** was obtained as a colourless oil (130 mg, 73%,  $\alpha/\beta = 1.5:1$ ).

Data for  $\alpha$ :

<sup>1</sup>H NMR (500 MHz, CDCl<sub>3</sub>)  $\delta$  7.43 – 7.18 (m, 24H), 7.17 – 7.16 (m, 4H), 7.16 (d,  $J = 8.0$  Hz, 2H), 5.61 (d,  $J = 3.6$  Hz, 1H), 5.49 (s, 1H), 5.02 (d,  $J = 10.8$  Hz, 1H), 4.83 (d,  $J = 4.6$  Hz, 1H), 4.81 (d,  $J = 4.9$  Hz, 1H), 4.73 (d,  $J = 3.7$  Hz, 1H), 4.68 (d,  $J = 11.2$  Hz, 1H), 4.62 (d,  $J = 6.2$  Hz, 1H), 4.60 (d,  $J = 1.8$  Hz, 1H), 4.58 (d,  $J = 8.9$  Hz, 1H), 4.37 (ddd,  $J = 27.4, 18.5, 11.7$  Hz, 3H), 4.27 (dd,  $J = 10.2, 4.8$  Hz, 1H), 4.22 (d,  $J = 10.1$  Hz, 1H), 3.99 (t,  $J = 9.3$  Hz, 1H), 3.90 (td,  $J = 9.9, 4.7$  Hz, 1H), 3.81 (t,  $J = 9.4$  Hz, 1H), 3.75 (d,  $J = 10.3$  Hz, 1H), 3.72 – 3.65 (m, 2H), 3.56 – 3.48 (m, 2H), 3.26 (d,  $J = 0.9$  Hz, 3H).

<sup>13</sup>C NMR (125 MHz, CDCl<sub>3</sub>)  $\delta$  139.0, 138.7, 138.5, 138.2, 138.1, 137.4, 134.5, 129.7, 129.0, 128.8, 128.4, 128.4, 128.3, 128.2, 128.2, 128.1, 128.0, 127.9, 127.9, 127.8, 127.8, 127.7, 127.6, 127.5, 126.2, 102.5, 101.4, 98.5, 84.9, 82.9, 80.5, 80.4, 78.0, 75.8, 75.6, 75.0, 74.8, 74.7, 73.8, 73.5, 69.1, 68.7, 62.2, 55.3.;

IR (CH<sub>2</sub>Cl<sub>2</sub>, cm<sup>-1</sup>) 3030, 2919, 1730, 1496, 1453, 1362, 1210, 1156, 1087, 1074, 1056, 1028, 998, 735, 697.;

ESI HRMS calcd for C<sub>55</sub>H<sub>58</sub>NaO<sub>11</sub> [M + Na]<sup>+</sup> 917.3871, found 917.3874.

Data for  $\beta$ :

<sup>1</sup>H NMR (500 MHz, CDCl<sub>3</sub>)  $\delta$  7.43 (dd,  $J = 7.8, 1.7$  Hz, 2H), 7.37 (dd,  $J = 7.8, 1.5$  Hz, 2H), 7.36 – 7.21 (m, 24H), 7.17 (dd,  $J = 7.3, 2.2$  Hz, 2H), 5.49 (s, 1H), 5.09 (d,  $J = 11.2$  Hz, 1H), 4.94 (d,  $J = 10.9$  Hz, 1H), 4.91 (d,  $J = 7.8$  Hz, 1H), 4.83 – 4.72 (m, 4H), 4.55 (d,  $J = 10.7$  Hz, 1H), 4.51 – 4.47 (m, 3H), 4.38 (t,  $J = 9.1$  Hz, 1H), 4.23 (dd,  $J = 10.1, 4.7$  Hz, 1H), 3.84 (td,  $J = 10.0, 4.7$  Hz, 1H), 3.73 – 3.60 (m, 5H), 3.59 (d,  $J = 3.1$  Hz, 1H), 3.52 (t,  $J = 8.3$  Hz, 1H), 3.50 (s, 3H), 3.48 (dd,  $J = 6.1, 3.3$  Hz, 1H).

<sup>13</sup>C NMR (125 MHz, CDCl<sub>3</sub>)  $\delta$  139.0, 138.9, 138.1, 137.9, 137.4, 137.1, 129.4, 128.8, 128.5, 128.5, 128.4, 128.3, 128.2, 128.1, 128.1, 128.1, 127.9, 127.9, 127.9, 127.7, 127.6, 127.5, 127.4, 127.4, 127.3, 126.4, 102.1, 98.5, 96.1, 84.9, 82.9, 80.5, 81.7, 78.0, 77.6, 77.4, 77.1, 76.9, 76.6, 75.5, 74.8, 73.4, 73.3, 72.7, 71.2, 69.8, 69.2, 68.2, 61.8, 55.3.;

IR (CH<sub>2</sub>Cl<sub>2</sub>, cm<sup>-1</sup>) 3374, 2866, 1729, 1693, 1617, 1496, 1453, 1359, 1265, 1088, 1027, 833, 734, 697.;

ESI HRMS calcd for C<sub>55</sub>H<sub>58</sub>NaO<sub>11</sub> [M + Na]<sup>+</sup> 917.3871, found 917.3881.

### Compound 32

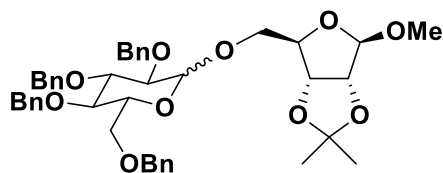

32

Following the General Glycosylation Procedure: After purification, **32** was obtained as a colourless oil (130 mg, 90%,  $\alpha/\beta = 2:1$ ).

<sup>1</sup>H NMR (500 MHz, CDCl<sub>3</sub>)  $\delta$  7.30 – 7.18 (m, 18H), 7.17 – 7.16 (m, 2H), 5.04 – 4.92 (m, 3H), 4.91 – 4.79 (m, 3H), 4.76 (dd,  $J = 7.7, 4.6$  Hz, 1H), 4.69 – 4.55 (m, 4H), 4.51 (t,  $J = 10.3$  Hz, 1H), 4.44 (ddd,  $J = 17.8, 8.6, 3.7$  Hz, 2H), 4.05 – 4.01 (m, 1H), 3.96 (ddd,  $J = 9.6, 8.3, 1.5$  Hz, 1H), 3.85 (d,  $J = 10.1$  Hz, 1H), 3.79 – 3.59 (m, 5H), 3.53 – 3.46 (m, 2H), 3.34 – 3.31 (m, 3H), 1.53 (s, 2H), 1.51 (s, 1H), 1.35 – 1.34 (m, 3H).

<sup>13</sup>C NMR (125 MHz, CDCl<sub>3</sub>)  $\delta$  138.9, 138.6, 138.4, 138.1, 138.0, 128.3, 128.3, 127.9, 127.8, 127.7, 127.6, 127.6, 112.3, 109.3, 109.2, 103.7, 98.1, 85.2, 85.1, 84.8, 84.6, 82.2, 82.1, 82.0, 81.8, 80.2, 77.8, 75.6, 75.0, 74.9, 73.5, 73.1, 70.5, 69.7, 68.9, 68.4, 54.8, 26.5, 25.1, 25.0.;

IR (CH<sub>2</sub>Cl<sub>2</sub>, cm<sup>-1</sup>) 2918, 1496, 1453, 1360, 1309, 1273, 1239, 1208, 1157, 1087, 1063, 1027, 1013, 961, 869, 734, 695.;

ESI HRMS calcd for C<sub>43</sub>H<sub>50</sub>NaO<sub>20</sub> [M + Na]<sup>+</sup> 749.3296, found 749.3291.

### Compound 33

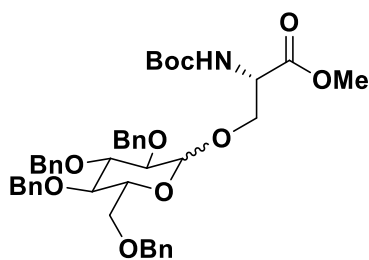

33

Following the General Glycosylation Procedure: After purification, **33** was obtained as a colourless oil (93 mg, 63%,  $\alpha/\beta = 1.1:1$ ).

<sup>1</sup>H NMR (400 MHz, CDCl<sub>3</sub>)  $\delta$  7.35 – 7.14 (m, 20H), 5.68 (d,  $J = 12.6$  Hz, 1H), 5.48 (d,  $J = 7.9$  Hz, 1H), 4.98 – 4.01 (m, 8H), 4.37 (d,  $J = 12.5$  Hz, 2H), 4.07 (d,  $J = 7.8$  Hz, 1H), 3.95 – 3.66 (m, 7H), 3.56 (dd,  $J = 9.5, 3.1$  Hz, 1H), 3.45 (m, 2H), 1.47 (s, 21H).

$^{13}\text{C}$  NMR (125 MHz,  $\text{CDCl}_3$ )  $\delta$  170.8, 170.7, 155.5, 155.4, 138.8, 138.5, 138.4, 138.2, 138.2, 138.1, 137.8, 128.5, 128.4, 128.4, 128.3, 128.2, 128.1, 128.0, 127.9, 127.9, 127.8, 127.7, 127.7, 127.7, 127.6, 127.6, 127.5, 103.8, 98.4, 84.5, 81.9, 81.7, 80.0, 79.9, 75.6, 75.2, 75.0, 74.9, 73.5, 73.5, 72.9, 70.7, 69.9, 69.8, 68.6, 68.3, 54.1, 54.0, 52.5, 52.4, 28.3.;

IR ( $\text{CH}_2\text{Cl}_2$ ,  $\text{cm}^{-1}$ ) 3030, 2918, 1748, 1714, 1496, 1453, 1364, 1248, 1208, 1159, 1065, 1027, 734, 696.;

ESI HRMS calcd for  $\text{C}_{43}\text{H}_{51}\text{NNaO}_{10}$   $[\text{M} + \text{Na}]^+$  764.3405, found 764.3406.

### Compound 34

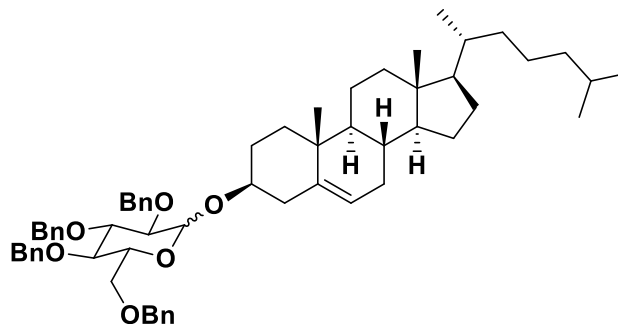

34

Following the General Glycosylation Procedure: After purification, **34** was obtained as a white solid (158 mg, 87%,  $\alpha/\beta = 1.2:1$ ).

Data for  $\alpha$ :

$^1\text{H}$  NMR (500 MHz,  $\text{CDCl}_3$ )  $\delta$  7.37 – 7.26 (m, 18H), 7.19 – 7.14 (m, 2H), 5.36 (s, 1H), 5.03 (d,  $J = 10.8$  Hz, 1H), 4.97 (d,  $J = 3.7$  Hz, 1H), 4.85 (dd,  $J = 10.7, 7.7$  Hz, 2H), 4.79 (d,  $J = 12.0$  Hz, 1H), 4.68 (d,  $J = 12.0$  Hz, 1H), 4.64 (d,  $J = 12.1$  Hz, 1H), 4.49 (dd,  $J = 11.4, 7.5$  Hz, 2H), 4.03 (t,  $J = 9.3$  Hz, 1H), 3.91 (ddd,  $J = 10.1, 3.5, 2.1$  Hz, 1H), 3.77 (dd,  $J = 10.6, 3.7$  Hz, 1H), 3.66 (ddd,  $J = 9.1, 5.2, 3.2$  Hz, 2H), 3.58 (dd,  $J = 9.7, 3.7$  Hz, 1H), 3.50 (tt,  $J = 11.3, 4.3$  Hz, 1H), 2.49 – 2.41 (m, 1H), 2.33 – 2.25 (m, 1H), 2.04 (dd,  $J = 9.2, 3.3$  Hz, 1H), 2.01 – 1.95 (m, 1H), 1.92 – 1.82 (m, 3H), 1.64 – 1.46 (m, 7H), 1.36 (ddd,  $J = 38.5, 23.7, 7.4$  Hz, 5H), 1.22 – 0.97 (m, 12H), 0.95 (d,  $J = 6.5$  Hz, 3H), 0.90 (dd,  $J = 6.6, 2.2$  Hz, 6H), 0.71 (s, 3H).

$^{13}\text{C}$  NMR (125 MHz,  $\text{CDCl}_3$ )  $\delta$  140.6, 138.7, 138.6, 138.3, 138.2, 128.4, 128.4, 128.4, 128.3, 128.1, 128.0, 127.9, 127.8, 127.7, 127.7, 127.6, 127.5, 121.9, 102.3, 84.8, 82.4, 79.7, 78.0, 76.6, 75.6, 75.0, 74.9, 74.8, 73.4, 70.1, 69.2, 56.8, 56.2, 50.1, 42.3, 39.8, 39.5, 39.1, 37.3, 36.8, 36.2, 35.8, 31.9, 31.9, 30.0, 28.2, 28.0, 24.3, 23.8, 22.8, 22.5, 21.1, 19.4, 18.7, 11.9.;

IR ( $\text{CH}_2\text{Cl}_2$ ,  $\text{cm}^{-1}$ ) 2931, 2865, 1496, 1453, 1361, 1207, 1156, 1069, 1027, 732, 695.;

ESI HRMS calcd for  $\text{C}_{61}\text{H}_{80}\text{NaO}_6$   $[\text{M} + \text{Na}]^+$  931.5847, found 931.5840.

Data for  $\beta$ :

$^1\text{H}$  NMR (500 MHz,  $\text{CDCl}_3$ )  $\delta$  7.40 – 7.27 (m, 18H), 7.17 – 7.15 (m, 2H), 5.32 (s, 1H), 4.98 (d,  $J = 10.9$  Hz, 1H), 4.93 (d,  $J = 10.9$  Hz, 1H), 4.83 – 4.80 (m, 2H), 4.75 (d,  $J = 13.6$  Hz, 1H), 4.71 – 4.50 (m, 4H), 3.74 (d,  $J = 10.5$  Hz, 1H), 3.67 – 3.43 (m, 6H), 2.38 (dd,  $J = 14.6, 3.9$  Hz,

2H), 2.04 – 1.82 (m, 5H), 1.57 – 0.99 (m, 24H), 0.93 (d,  $J = 6.3$  Hz, 3H), 0.89 (d,  $J = 6.6$  Hz, 6H), 0.88 (s, 3H).

$^{13}\text{C}$  NMR (100 MHz,  $\text{CDCl}_3$ )  $\delta$  140.8, 139.0, 138.3, 138.0, 128.4, 128.4, 128.3, 128.2, 128.0, 127.9, 127.8, 127.7, 127.6, 127.5, 121.7, 94.7, 82.1, 80.0, 77.9, 75.7, 75.6, 73.4, 73.0, 70.1, 68.7, 56.8, 56.2, 50.2, 42.4, 39.9, 39.8, 39.5, 37.3, 36.8, 36.2, 35.8, 32.0, 31.9, 28.2, 28.0, 27.5, 24.3, 23.8, 22.8, 22.6, 21.1, 19.4, 18.7, 11.9.;

IR ( $\text{CH}_2\text{Cl}_2$ ,  $\text{cm}^{-1}$ ) 2933, 2866, 1496, 1453, 1362, 1274, 1208, 1069, 1028, 733, 696.;

ESI HRMS calcd for  $\text{C}_{61}\text{H}_{80}\text{NaO}_6$   $[\text{M} + \text{Na}]^+$  931.5847, found 931.5840.

### Compound 35

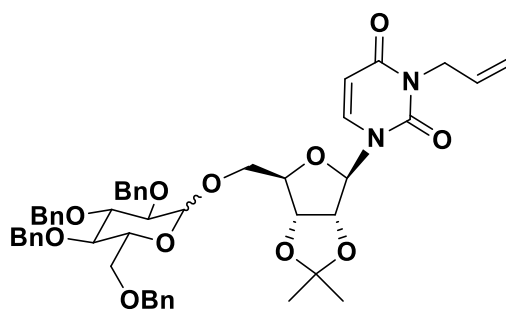

35

Following the General Glycosylation Procedure: After purification, **35** was obtained as a colourless oil (115 mg, 68%,  $\alpha/\beta = 1.3:1$ ).

Data for  $\alpha$ :

$^1\text{H}$  NMR (500 MHz,  $\text{CDCl}_3$ )  $\delta$  7.88 (d,  $J = 8.1$  Hz, 1H), 7.41 – 7.26 (m, 20H), 7.17 – 7.10 (m, 2H), 6.10 (d,  $J = 2.8$  Hz, 1H), 5.90 (ddt,  $J = 17.1, 10.2, 5.8$  Hz, 1H), 5.60 (d,  $J = 8.0$  Hz, 1H), 5.28 (dq,  $J = 17.1, 1.4$  Hz, 1H), 5.20 (dq,  $J = 10.2, 1.1$  Hz, 1H), 4.97 (d,  $J = 10.9$  Hz, 1H), 4.85 (d,  $J = 2.3$  Hz, 1H), 4.82 (t,  $J = 6.9$  Hz, 2H), 4.77 (dd,  $J = 6.2, 3.9$  Hz, 1H), 4.70 – 4.65 (m, 2H), 4.62 (dd,  $J = 12.2, 6.3$  Hz, 2H), 4.57 – 4.51 (m, 1H), 4.50 (t,  $J = 2.4$  Hz, 1H), 4.48 (d,  $J = 3.7$  Hz, 1H), 4.38 (dd,  $J = 6.6, 3.0$  Hz, 1H), 3.90 (dd,  $J = 10.9, 3.2$  Hz, 1H), 3.86 (dd,  $J = 9.5, 8.5$  Hz, 1H), 3.75 – 3.58 (m, 5H), 1.62 (s, 3H), 1.38 (s, 3H).

$^{13}\text{C}$  NMR (125 MHz,  $\text{CDCl}_3$ )  $\delta$  162.2, 150.7, 139.0, 138.5, 137.9, 137.9, 137.8, 131.5, 128.6, 128.5, 128.4, 128.4, 128.2, 128.0, 127.9, 127.9, 127.8, 127.8, 127.8, 118.1, 114.6, 102.4, 97.7, 91.6, 85.0, 84.4, 82.0, 80.0, 79.9, 77.5, 75.7, 75.3, 73.8, 73.6, 70.9, 68.3, 67.6, 43.0, 27.5, 25.6.;

IR ( $\text{CH}_2\text{Cl}_2$ ,  $\text{cm}^{-1}$ ) 3030, 2918, 1710, 1666, 1496, 1451, 1362, 1356, 1270, 1209, 1155, 1068, 1027, 858, 734, 696.;

ESI HRMS calcd for  $\text{C}_{49}\text{H}_{54}\text{N}_2\text{NaO}_{11}$   $[\text{M} + \text{Na}]^+$  869.3620, found 869.3629.

Data for  $\beta$ :

$^1\text{H}$  NMR (500 MHz,  $\text{CDCl}_3$ )  $\delta$  7.62 (d,  $J = 8.1$  Hz, 1H), 7.39 – 7.27 (m, 20H), 7.20 – 7.15 (m, 2H), 5.91 (ddt,  $J = 17.1, 10.2, 5.8$  Hz, 1H), 5.84 (d,  $J = 2.5$  Hz, 1H), 5.76 (d,  $J = 8.1$  Hz, 1H), 5.28 (dq,  $J = 17.1, 1.4$  Hz, 1H), 5.19 (dq,  $J = 10.2, 1.2$  Hz, 1H), 4.91 (d,  $J = 11.0$  Hz, 1H), 4.85 (d,  $J = 1.8$  Hz, 1H), 4.83 (d,  $J = 2.2$  Hz, 1H), 4.79 – 4.74 (m, 3H), 4.68 (dd,  $J = 6.3, 2.5$  Hz,



1H), 4.63 (s, 1H), 4.59 – 4.53 (m, 3H), 4.53 – 4.49 (m, 1H), 4.43 (d,  $J = 7.8$  Hz, 1H), 4.27 (dd,  $J = 10.8, 2.8$  Hz, 1H), 3.76 – 3.60 (m, 5H), 3.47 (ddd,  $J = 9.4, 4.5, 1.9$  Hz, 1H), 3.39 – 3.33 (m, 1H), 1.60 (s, 3H), 1.31 (s, 3H).

$^{13}\text{C}$  NMR (125 MHz,  $\text{CDCl}_3$ )  $\delta$  162.3, 150.6, 139.1, 138.4, 138.1, 138.0, 137.9, 131.5, 128.4, 128.4, 128.0, 127.8, 127.7, 127.7, 127.6, 127.6, 127.6, 118.1, 114.1, 103.2, 101.4, 94.5, 85.8, 85.7, 84.7, 82.1, 80.9, 77.7, 75.6, 75.1, 75.0, 74.9, 73.5, 69.5, 68.7, 42.9, 27.2, 25.2.;

IR ( $\text{CH}_2\text{Cl}_2$ ,  $\text{cm}^{-1}$ ) 3030, 2917, 1710, 1665, 1496, 1452, 1414, 1382, 1360, 1270, 1209, 1155, 1064, 1027, 1000, 806, 733, 696.;

ESI HRMS calcd for  $\text{C}_{49}\text{H}_{54}\text{N}_2\text{NaO}_{11}$   $[\text{M} + \text{Na}]^+$  869.3620, found 869.3628.

### Compound 36

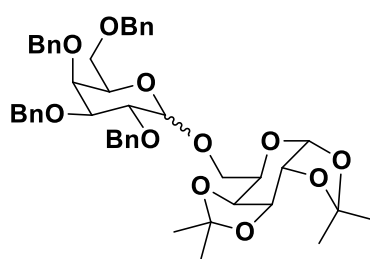

36

Following the General Glycosylation Procedure: After purification, **36** was obtained as a colourless oil (134 mg, 86%,  $\alpha/\beta = 1.5:1$ ).

Data for  $\alpha$ :

$^1\text{H}$  NMR (500 MHz,  $\text{CDCl}_3$ )  $\delta$  7.42 – 7.25 (m, 20H), 5.54 (d,  $J = 5.1$  Hz, 1H), 5.04 (d,  $J = 3.7$  Hz, 1H), 4.96 (d,  $J = 11.5$  Hz, 1H), 4.86 (d,  $J = 11.7$  Hz, 1H), 4.81 – 4.74 (m, 3H), 4.64 – 4.57 (m, 2H), 4.51 (d,  $J = 11.8$  Hz, 1H), 4.44 (d,  $J = 11.8$  Hz, 1H), 4.37 – 4.31 (m, 2H), 4.11 – 4.02 (m, 4H), 3.99 (dd,  $J = 10.1, 2.8$  Hz, 1H), 3.79 (ddd,  $J = 25.8, 10.5, 6.8$  Hz, 2H), 3.60 (dd,  $J = 9.2, 7.6$  Hz, 1H), 3.55 (dd,  $J = 9.2, 5.7$  Hz, 1H), 1.55 (s, 3H), 1.46 (s, 3H), 1.35 (s, 3H), 1.33 (s, 3H).

$^{13}\text{C}$  NMR (125 MHz,  $\text{CDCl}_3$ )  $\delta$  138.9, 138.8, 138.1, 128.4, 128.3, 128.2, 128.2, 127.8, 127.7, 127.6, 127.4, 127.4, 127.3, 109.2, 108.5, 97.6, 96.3, 79.0, 76.4, 74.7, 73.4, 73.0, 72.6, 70.9, 70.7, 69.2, 68.7, 66.3, 65.8, 26.1, 26.0, 24.9, 24.6.;

IR ( $\text{CH}_2\text{Cl}_2$ ,  $\text{cm}^{-1}$ ) 3030, 2985, 2914, 1724, 1495, 1453, 1331, 1254, 1210, 1165, 1095, 1067, 1028, 1000, 889, 736, 696.;

ESI HRMS calcd for  $\text{C}_{46}\text{H}_{54}\text{NaO}_{11}$   $[\text{M} + \text{Na}]^+$  805.3558, found 805.3562.

Data for  $\beta$ :

$^1\text{H}$  NMR (500 MHz,  $\text{CDCl}_3$ )  $\delta$  7.48 – 7.45 (m, 2H), 7.41 – 7.26 (m, 18H), 5.59 (d,  $J = 5.0$  Hz, 1H), 5.08 (d,  $J = 11.0$  Hz, 1H), 4.96 (d,  $J = 11.6$  Hz, 1H), 4.82 (d,  $J = 11.9$  Hz, 1H), 4.75 (t,  $J = 12.0$  Hz, 2H), 4.64 (d,  $J = 11.6$  Hz, 1H), 4.60 (dd,  $J = 7.9, 2.4$  Hz, 1H), 4.49 – 4.41 (m, 3H), 4.33 (dd,  $J = 5.0, 2.4$  Hz, 1H), 4.24 (dd,  $J = 7.9, 1.9$  Hz, 1H), 4.15 (dd,  $J = 10.6, 3.6$  Hz, 1H), 4.10 (ddd,  $J = 7.3, 3.4, 1.8$  Hz, 1H), 3.91 (d,  $J = 2.5$  Hz, 1H), 3.85 (dd,  $J = 9.8, 7.7$  Hz, 1H),

3.72 (dd,  $J = 10.6, 7.5$  Hz, 1H), 3.57 (dddd,  $J = 12.7, 9.8, 7.3, 5.3$  Hz, 4H), 1.52 (s, 3H), 1.46 (s, 3H), 1.34 (s, 3H), 1.33 (s, 3H).

$^{13}\text{C}$  NMR (125 MHz,  $\text{CDCl}_3$ )  $\delta$  139.1, 138.7, 138.7, 137.9, 128.6, 128.4, 128.4, 128.3, 128.1, 128.1, 127.9, 127.5, 127.5, 109.3, 108.6, 104.7, 96.4, 82.0, 79.1, 74.7, 74.5, 73.7, 73.5, 73.3, 73.1, 71.5, 70.8, 70.5, 69.6, 68.7, 67.4, 26.0, 26.0, 25.0, 24.4.;

IR ( $\text{CH}_2\text{Cl}_2$ ,  $\text{cm}^{-1}$ ) 3030, 2932, 2865, 1496, 1453, 1362, 1255, 1208, 1070, 1028, 733, 696.;

ESI HRMS calcd for  $\text{C}_{46}\text{H}_{54}\text{NaO}_{11}$   $[\text{M} + \text{Na}]^+$  805.3558, found 805.3562.

### Compound 37

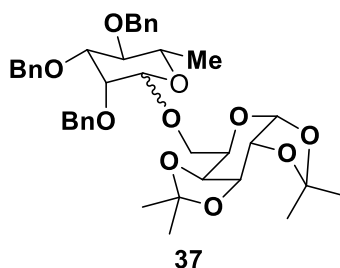

Following the General Glycosylation Procedure: After purification, **37** was obtained as a colourless oil (120 mg, 89%,  $\alpha/\beta = 1.6:1$ ).

Data for  $\alpha$ :

$^1\text{H}$  NMR (500 MHz,  $\text{CDCl}_3$ )  $\delta$  7.44 – 7.42 (m, 2H), 7.40 – 7.30 (m, 13H), 5.57 (d,  $J = 5.0$  Hz, 1H), 4.99 (d,  $J = 11.0$  Hz, 1H), 4.94 (d,  $J = 1.5$  Hz, 1H), 4.78 (s, 2H), 4.69 (d,  $J = 11.0$  Hz, 1H), 4.64 (d,  $J = 1.9$  Hz, 2H), 4.63 (dd,  $J = 7.9, 2.3$  Hz, 1H), 4.35 (dd,  $J = 5.0, 2.4$  Hz, 1H), 4.20 (dd,  $J = 7.9, 1.9$  Hz, 1H), 3.95 (td,  $J = 5.2, 2.6$  Hz, 1H), 3.90 – 3.84 (m, 3H), 3.80 (ddd,  $J = 12.4, 7.9, 4.7$  Hz, 1H), 3.67 (t,  $J = 9.2$  Hz, 1H), 3.61 (dd,  $J = 10.5, 7.0$  Hz, 1H), 1.56 (s, 3H), 1.49 (s, 3H), 1.39 – 1.37 (m, 6H), 1.37 (s, 3H).

$^{13}\text{C}$  NMR (125 MHz,  $\text{CDCl}_3$ )  $\delta$  138.8, 138.6, 138.5, 128.2, 127.8, 127.8, 127.6, 127.5, 127.5, 127.4, 109.2, 108.5, 98.0, 96.2, 80.4, 79.9, 75.2, 74.7, 72.6, 71.9, 71.1, 70.6, 70.5, 68.0, 67.2, 65.9, 26.1, 25.9, 24.9, 24.4, 17.9.;

IR ( $\text{CH}_2\text{Cl}_2$ ,  $\text{cm}^{-1}$ ) 3030, 2910, 1496, 1453, 1381, 1371, 1254, 1209, 1167, 1113, 1064, 1027, 1000, 916, 732, 696.;

ESI HRMS calcd for  $\text{C}_{39}\text{H}_{48}\text{NaO}_{10}$   $[\text{M} + \text{Na}]^+$  699.3140, found 699.3148.

Data for  $\beta$ :

$^1\text{H}$  NMR (500 MHz,  $\text{CDCl}_3$ )  $\delta$  7.50 – 7.46 (m, 2H), 7.37 – 7.26 (m, 13H), 5.55 (d,  $J = 5.0$  Hz, 1H), 4.98 (d,  $J = 11.0$  Hz, 2H), 4.91 (d,  $J = 12.5$  Hz, 1H), 4.67 (d,  $J = 10.8$  Hz, 1H), 4.62 (dd,  $J = 8.0, 2.3$  Hz, 1H), 4.54 (d,  $J = 11.9$  Hz, 1H), 4.47 (d,  $J = 11.8$  Hz, 1H), 4.43 (s, 1H), 4.34 (dd,  $J = 5.0, 2.3$  Hz, 1H), 4.26 (dd,  $J = 8.0, 1.7$  Hz, 1H), 4.12 – 4.07 (m, 1H), 4.00 – 3.92 (m, 2H), 3.74 (dd,  $J = 9.4, 8.5$  Hz, 1H), 3.63 (t,  $J = 9.3$  Hz, 1H), 3.48 (dd,  $J = 9.4, 3.0$  Hz, 1H), 3.33 (dq,  $J = 9.2, 6.1$  Hz, 1H), 1.57 (s, 3H), 1.48 (s, 3H), 1.39 (d,  $J = 6.2$  Hz, 3H), 1.36 (s, 3H), 1.35 (s, 3H).

$^{13}\text{C}$  NMR (125 MHz,  $\text{CDCl}_3$ )  $\delta$  138.8, 138.5, 138.2, 128.5, 128.4, 128.3, 128.1, 128.1, 128.1, 127.7, 127.6, 127.5, 127.4, 109.0, 108.5, 101.7, 96.3, 82.1, 80.1, 75.4, 73.9, 73.7, 72.0, 71.5, 70.8, 70.6, 70.5, 67.7, 65.8, 26.2, 26.0, 24.9, 24.4, 17.9.;

IR ( $\text{CH}_2\text{Cl}_2$ ,  $\text{cm}^{-1}$ ) 3293, 3030, 2933, 1730, 1601, 1496, 1453, 1371, 1254, 1209, 1168, 1103, 1067, 998, 823, 735, 696.;

ESI HRMS calcd for  $\text{C}_{39}\text{H}_{48}\text{NaO}_{10}$   $[\text{M} + \text{Na}]^+$  699.3140, found 699.3151.

### Compound 38

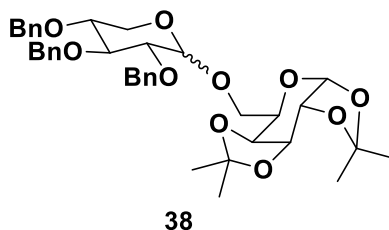

Following the General Glycosylation Procedure: After purification, **38** was obtained as a colourless oil (107 mg, 81%,  $\alpha/\beta = 1.1:1$ ).

Data for  $\alpha$ :

$^1\text{H}$  NMR (500 MHz,  $\text{CDCl}_3$ )  $\delta$  7.40 – 7.29 (m, 15H), 5.57 (d,  $J = 5.0$  Hz, 1H), 4.96 (d,  $J = 10.9$  Hz, 1H), 4.92 (d,  $J = 3.6$  Hz, 1H), 4.89 (d,  $J = 10.9$  Hz, 1H), 4.79 – 4.72 (m, 3H), 4.66 (d,  $J = 11.6$  Hz, 1H), 4.65 – 4.62 (m, 1H), 4.40 (dd,  $J = 8.0, 1.9$  Hz, 1H), 4.35 (dd,  $J = 5.0, 2.4$  Hz, 1H), 4.10 – 4.04 (m, 1H), 3.96 – 3.89 (m, 1H), 3.81 (dd,  $J = 10.3, 6.0$  Hz, 1H), 3.75 (dd,  $J = 10.3, 7.7$  Hz, 1H), 3.69 – 3.55 (m, 3H), 3.50 (dd,  $J = 9.5, 3.6$  Hz, 1H), 1.58 (s, 3H), 1.49 (s, 3H), 1.37 (s, 3H), 1.35 (s, 3H).

$^{13}\text{C}$  NMR (125 MHz,  $\text{CDCl}_3$ )  $\delta$  139.0, 138.4, 138.3, 128.4, 128.3, 128.3, 128.0, 127.8, 127.7, 127.7, 127.6, 127.5, 109.1, 108.6, 97.2, 96.3, 81.2, 79.6, 78.0, 75.6, 73.4, 72.5, 70.8, 70.7, 70.6, 66.3, 65.8, 60.0, 26.1, 26.0, 24.9, 24.6.;

IR ( $\text{CH}_2\text{Cl}_2$ ,  $\text{cm}^{-1}$ ) 3030, 2985, 2933, 1729, 1496, 1454, 1380, 1371, 1254, 1209, 1166, 1066, 998, 736, 697.;

ESI HRMS calcd for  $\text{C}_{38}\text{H}_{46}\text{NaO}_{10}$   $[\text{M} + \text{Na}]^+$  685.2983, found 685.2991.

Data for  $\beta$ :

$^1\text{H}$  NMR (500 MHz,  $\text{CDCl}_3$ )  $\delta$  7.43 (dd,  $J = 7.9, 1.6$  Hz, 2H), 7.37 – 7.29 (m, 13H), 5.58 (d,  $J = 5.0$  Hz, 1H), 5.02 (d,  $J = 11.1$  Hz, 1H), 4.91 (d,  $J = 11.0$  Hz, 1H), 4.85 (d,  $J = 11.0$  Hz, 1H), 4.74 (t,  $J = 11.6$  Hz, 2H), 4.63 (d,  $J = 11.6$  Hz, 1H), 4.61 (dd,  $J = 7.9, 2.4$  Hz, 1H), 4.43 (d,  $J = 7.6$  Hz, 1H), 4.34 (dd,  $J = 5.0, 2.4$  Hz, 1H), 4.25 (dd,  $J = 7.9, 1.6$  Hz, 1H), 4.13 – 4.04 (m, 2H), 3.93 (dd,  $J = 11.5, 5.0$  Hz, 1H), 3.81 – 3.72 (m, 1H), 3.61 (ddd,  $J = 24.5, 12.9, 7.0$  Hz, 2H), 3.45 – 3.37 (m, 1H), 3.22 (dd,  $J = 11.6, 9.7$  Hz, 1H), 1.52 (s, 3H), 1.48 (s, 3H), 1.34 (s, 3H), 1.34 (s, 3H).

$^{13}\text{C}$  NMR (125 MHz,  $\text{CDCl}_3$ )  $\delta$  138.8, 138.7, 138.2, 128.4, 128.3, 128.2, 127.9, 127.8, 127.8, 127.5, 127.5, 109.4, 108.5, 104.9, 96.4, 83.7, 81.4, 77.8, 75.6, 74.5, 73.4, 71.3, 70.7, 70.5, 69.4, 67.1, 63.9, 26.0, 26.0, 25.0, 24.4.;

IR ( $\text{CH}_2\text{Cl}_2$ ,  $\text{cm}^{-1}$ ) 3030, 2982, 2902, 1731, 1496, 1454, 1372, 1254, 1209, 1167, 1067, 1002, 898, 735, 697.;

ESI HRMS calcd for  $\text{C}_{38}\text{H}_{46}\text{NaO}_{10}$   $[\text{M} + \text{Na}]^+$  685.2983, found 685.2992.

### Compound 39

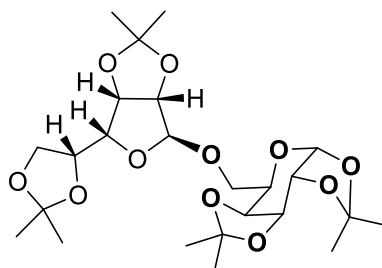

39

Following the General Glycosylation Procedure: After purification, **39** was obtained as a colourless oil (81 mg, 81%,  $\alpha$  only).

$^1\text{H}$  NMR (500 MHz,  $\text{CDCl}_3$ )  $\delta$  5.53 (d,  $J = 5.1$  Hz, 1H), 5.03 (s, 1H), 4.79 (dd,  $J = 5.9, 3.6$  Hz, 1H), 4.64 (d,  $J = 5.9$  Hz, 1H), 4.61 (dd,  $J = 7.9, 2.4$  Hz, 1H), 4.39 (ddd,  $J = 8.0, 6.2, 4.4$  Hz, 1H), 4.32 (dd,  $J = 5.0, 2.4$  Hz, 1H), 4.22 (dd,  $J = 7.9, 1.9$  Hz, 1H), 4.10 (dd,  $J = 8.7, 6.2$  Hz, 1H), 4.05 (dd,  $J = 8.7, 4.4$  Hz, 1H), 3.97 (ddd,  $J = 8.5, 7.3, 2.7$  Hz, 2H), 3.75 (dd,  $J = 10.5, 6.7$  Hz, 1H), 3.65 (dd,  $J = 10.5, 6.7$  Hz, 1H), 1.54 (s, 3H), 1.47 (s, 3H), 1.45 (s, 3H), 1.45 (s, 3H), 1.38 (s, 3H), 1.35 (s, 3H), 1.33 (s, 3H), 1.33 (s, 3H).

$^{13}\text{C}$  NMR (125 MHz,  $\text{CDCl}_3$ )  $\delta$  112.5, 109.3, 109.2, 108.5, 106.7, 96.3, 85.0, 80.3, 79.5, 73.0, 70.9, 70.6, 70.5, 66.9, 66.0, 66.0, 26.9, 26.0, 25.9, 25.9, 25.2, 24.9, 24.6, 24.5.;

IR ( $\text{CH}_2\text{Cl}_2$ ,  $\text{cm}^{-1}$ ) 3294, 2986, 2936, 1729, 1061, 1455, 1371, 1255, 1209, 1164, 1065, 999, 846, 824.;

ESI HRMS calcd for  $\text{C}_{24}\text{H}_{38}\text{NaO}_{11}$   $[\text{M} + \text{Na}]^+$  525.2306, found 525.2310.

### Compound 45

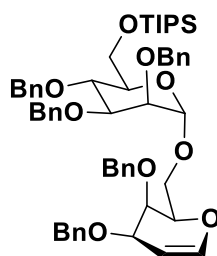

45

Following the General Glycosylation Procedure: After purification, **45** was obtained as a colourless oil (73 mg, 40%,  $\alpha/\beta > 20:1$ ).

$^1\text{H}$  NMR (400 MHz,  $\text{CDCl}_3$ )  $\delta$  7.39 – 7.27 (m, 25H), 6.34 (d,  $J = 6.2$  Hz, 1H), 4.92 (dd,  $J = 15.9, 11.4$  Hz, 3H), 4.70 (ddd,  $J = 27.5, 22.8, 13.1$  Hz, 9H), 4.22 (s, 1H), 4.06 (d,  $J = 9.2$  Hz, 1H), 4.03 – 3.85 (m, 6H), 3.69 (s, 1H), 3.60 (dd,  $J = 10.1, 5.4$  Hz, 2H), 1.10 (s, 21H).

$^{13}\text{C}$  NMR (100 MHz,  $\text{CDCl}_3$ )  $\delta$  144.1, 138.7, 138.6, 138.5, 138.4, 128.4, 128.3, 128.3, 128.3, 128.2, 128.1, 127.7, 127.6, 127.5, 127.5, 127.5, 127.4, 99.8, 97.5, 80.1, 75.3, 75.2, 74.9, 74.7, 73.5, 73.3, 72.5, 72.2, 70.9, 70.8, 65.0, 62.9, 18.0, 18.0, 12.0.;

IR ( $\text{CH}_2\text{Cl}_2$ ,  $\text{cm}^{-1}$ ) 2940, 2864, 1496, 1453, 1362, 1098, 1056, 1027, 882, 734, 698.;

ESI HRMS calcd for  $\text{C}_{56}\text{H}_{70}\text{NaO}_9\text{Si}$  [ $\text{M} + \text{Na}$ ] $^+$  937.4681, found 937.4685.

### Compound 46

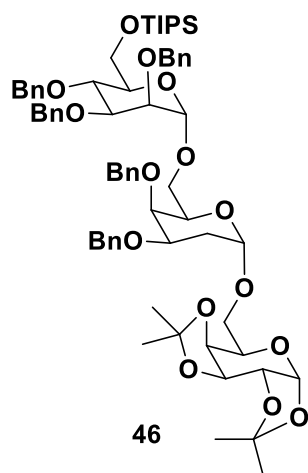

To an oven-dried 1.5 dram vial equipped with a stirbar were added 0.05 mmol glycosyl acceptor **45**, 0.06 mmol glycosyl donor **43**, 0.001 mmol PhSSPh, 0.0005 mmol Eosin Y free acid and 0.25 mL dry dichloromethane. The vial was sealed with a Teflon cap and stirred at room temperature under irradiation with blue LEDs. Upon completion of the reaction 6 hours, the solution was concentrated in vacuo, and the residue was purified by flash column chromatograph to afford glycosides. After purification, **46** was obtained as a colourless oil (46 mg, 78%,  $\alpha/\beta > 20:1$ ).

$^1\text{H}$  NMR (400 MHz,  $\text{CDCl}_3$ )  $\delta$  7.37 – 7.24 (m, 25H), 5.51 (d,  $J = 5.0$  Hz, 1H), 5.03 (d,  $J = 2.7$  Hz, 1H), 4.90 (dd,  $J = 11.1, 8.7$  Hz, 2H), 4.76 – 4.55 (m, 8H), 4.53 (d,  $J = 4.1$  Hz, 1H), 4.50 (s, 1H), 4.25 (dd,  $J = 5.0, 2.4$  Hz, 1H), 4.19 (dd,  $J = 7.9, 1.7$  Hz, 1H), 4.08 (t,  $J = 9.6$  Hz, 1H), 3.98 (dt,  $J = 22.2, 5.8$  Hz, 4H), 3.88 – 3.82 (m, 2H), 3.79 – 3.63 (m, 4H), 3.59 (d,  $J = 11.8$  Hz, 2H), 3.46 – 3.39 (m, 1H), 2.21 (td,  $J = 12.5, 3.4$  Hz, 1H), 2.04 (dd,  $J = 12.6, 4.2$  Hz, 1H), 1.58 (s, 3H), 1.50 (s, 3H), 1.41 (s, 3H), 1.29 (s, 3H), 1.09 (s, 21H).

$^{13}\text{C}$  NMR (125 MHz,  $\text{CDCl}_3$ )  $\delta$  138.9, 138.9, 138.8, 138.6, 138.6, 128.4, 128.3, 128.3, 128.2, 128.2, 128.1, 128.0, 127.7, 127.5, 127.5, 127.5, 127.4, 127.3, 127.3, 109.3, 108.4, 97.3, 96.8, 96.4, 80.1, 75.6, 75.1, 74.8, 74.6, 74.2, 73.3, 72.9, 72.4, 71.1, 70.7, 70.5, 70.5, 69.3, 65.6, 65.5, 65.1, 62.8, 30.9, 26.1, 26.0, 24.9, 24.5, 18.0, 18.0, 12.0.;

IR (CH<sub>2</sub>Cl<sub>2</sub>, cm<sup>-1</sup>) 2938, 2865, 1454, 1381, 1254, 1210, 1069, 1003, 883, 735, 697.;

ESI HRMS calcd for C<sub>68</sub>H<sub>90</sub>NaO<sub>15</sub>Si [M + Na]<sup>+</sup> 1197.5941, found 1197.5938.

### Galactose donor

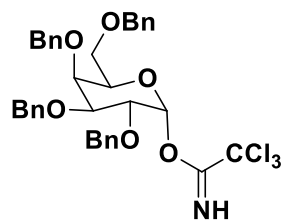

S-4

<sup>1</sup>H NMR (400 MHz, CDCl<sub>3</sub>) δ 8.55 (s, 1H), 7.39 – 7.27 (m, 20H), 6.55 (d, *J* = 2.3 Hz, 1H), 5.00 (d, *J* = 11.3 Hz, 1H), 4.87 – 4.78 (m, 4H), 4.63 (d, *J* = 11.2 Hz, 1H), 4.51 – 4.42 (m, 2H), 4.28 (d, *J* = 2.6 Hz, 1H), 4.26 (d, *J* = 2.5 Hz, 1H), 4.21 – 4.04 (m, 2H), 3.67 – 3.57 (m, 2H).

<sup>13</sup>C NMR (126 MHz, CDCl<sub>3</sub>) δ 161.3, 138.5, 138.5, 138.4, 137.8, 128.4, 128.3, 128.2, 128.2, 128.1, 127.8, 127.7, 127.6, 127.6, 127.5, 127.4, 95.2, 77.9, 75.9, 74.9, 74.7, 73.4, 73.0, 72.9, 72.2, 68.3.;

### Rhamnose donor

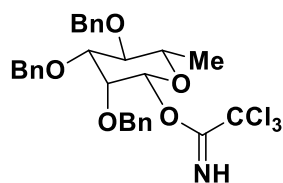

S-5

<sup>1</sup>H NMR (500 MHz, CDCl<sub>3</sub>) δ 8.54 (s, 1H), 7.47 – 7.42 (m, 2H), 7.41 – 7.30 (m, 13H), 6.28 (d, *J* = 1.9 Hz, 1H), 5.00 (d, *J* = 10.7 Hz, 1H), 4.80 (s, 2H), 4.72 – 4.59 (m, 3H), 3.98 – 3.86 (m, 3H), 3.74 (t, *J* = 9.4 Hz, 1H), 1.39 (d, *J* = 6.2 Hz, 4H).

<sup>13</sup>C NMR (126 MHz, CDCl<sub>3</sub>) δ 160.5, 138.3, 138.1, 137.9, 128.4, 128.4, 128.4, 128.4, 128.4, 128.3, 128.2, 127.9, 127.9, 127.8, 127.8, 127.7, 96.0, 79.8, 78.9, 75.6, 73.9, 72.8, 72.3, 71.1, 18.0.;

### Xylose donor

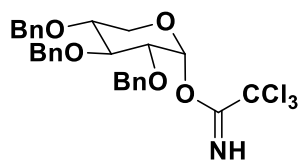

S-6

$^1\text{H}$  NMR (500 MHz,  $\text{CDCl}_3$ )  $\delta$  8.74 (s, 1H), 7.42 – 7.26 (m, 15H), 5.86 (d,  $J = 6.8$  Hz, 1H), 5.03 – 4.87 (m, 2H), 4.85 – 4.76 (m, 3H), 4.73 – 4.60 (m, 1H), 4.07 – 3.93 (m, 1H), 3.85 – 3.66 (m, 3H), 3.50 (dd,  $J = 11.9, 8.8$  Hz, 1H).

$^{13}\text{C}$  NMR (126 MHz,  $\text{CDCl}_3$ )  $\delta$  161.2, 138.4, 137.9, 137.9, 128.5, 128.3, 128.3, 128.3, 128.0, 127.9, 127.9, 127.8, 127.8, 127.5, 98.8, 94.3, 82.9, 80.8, 80.0, 79.0, 77.2, 77.1, 75.7, 75.3, 74.8, 73.7, 73.1, 73.0, 64.5, 62.4.;

### Mannofuranose derived donor

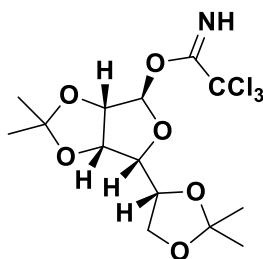

S-8

$^1\text{H}$  NMR (500 MHz,  $\text{CDCl}_3$ )  $\delta$  8.61 (s, 1H), 6.28 (s, 1H), 4.94 (dd,  $J = 5.9, 3.4$  Hz, 1H), 4.88 (d,  $J = 5.9$  Hz, 1H), 4.45 (ddd,  $J = 8.2, 6.2, 4.2$  Hz, 1H), 4.19 – 4.11 (m, 2H), 4.06 (dd,  $J = 8.9, 4.2$  Hz, 1H), 1.53 (s, 3H), 1.47 (s, 3H), 1.40 (d,  $J = 0.4$  Hz, 3H), 1.39 (s, 3H).

$^{13}\text{C}$  NMR (125 MHz,  $\text{CDCl}_3$ )  $\delta$  160.7, 113.4, 109.4, 104.8, 84.8, 82.9, 79.2, 72.7, 67.1, 27.0, 26.0, 25.1, 24.7;

### 3. References

1. R. Babouri, L. Clarion, M. Rolland, A. Van der Lee, Z. Kabouche, J. N. Volle, D. Virieux and J. L. Pirat, *Eur J Org Chem*, 2017, 5357-5369.
2. C. F. Becker, X. Liu, D. Olschewski, R. Castelli, R. Seidel and P. H. Seeberger, *Angew Chem Int Ed Engl*, 2008, **47**, 8215-8219.
3. C. Bucher and R. Gilmour, *Angew Chem Int Ed Engl*, 2010, **49**, 8724-8728.
4. S. Chatterjee, S. Moon, F. Hentschel, K. Gilmore and P. H. Seeberger, *J Am Chem Soc*, 2018, **140**, 11942-11953.
5. P. B. Cranwell, A. T. Russell and C. D. J. S. Smith, *Synlett*, 2016, **27**, 131-135.
6. P. Dallabernardina, F. Schuhmacher, P. H. Seeberger and F. Pfrengele, *Org Biomol Chem*, 2016, **14**, 309-313.
7. S. Friedrich-Bochnitschek, H. Waldmann and H. Kunz, *J Org Chem*, 1989, **54**, 751-756.
8. K. Ikeuchi, K. Murasawa and H. J. S. Yamada, *Synlett*, 2019, **30**, 1308-1312.
9. M. Shaw and A. Kumar, *Org Lett*, 2019, **21**, 3108-3113.

10. J. Yang, C. Cooper-Vanosdell, E. A. Mensah and H. M. Nguyen, *J Org Chem*, 2008, **73**, 794-800.

#### **4. Copies of the Related NMR Spectra**



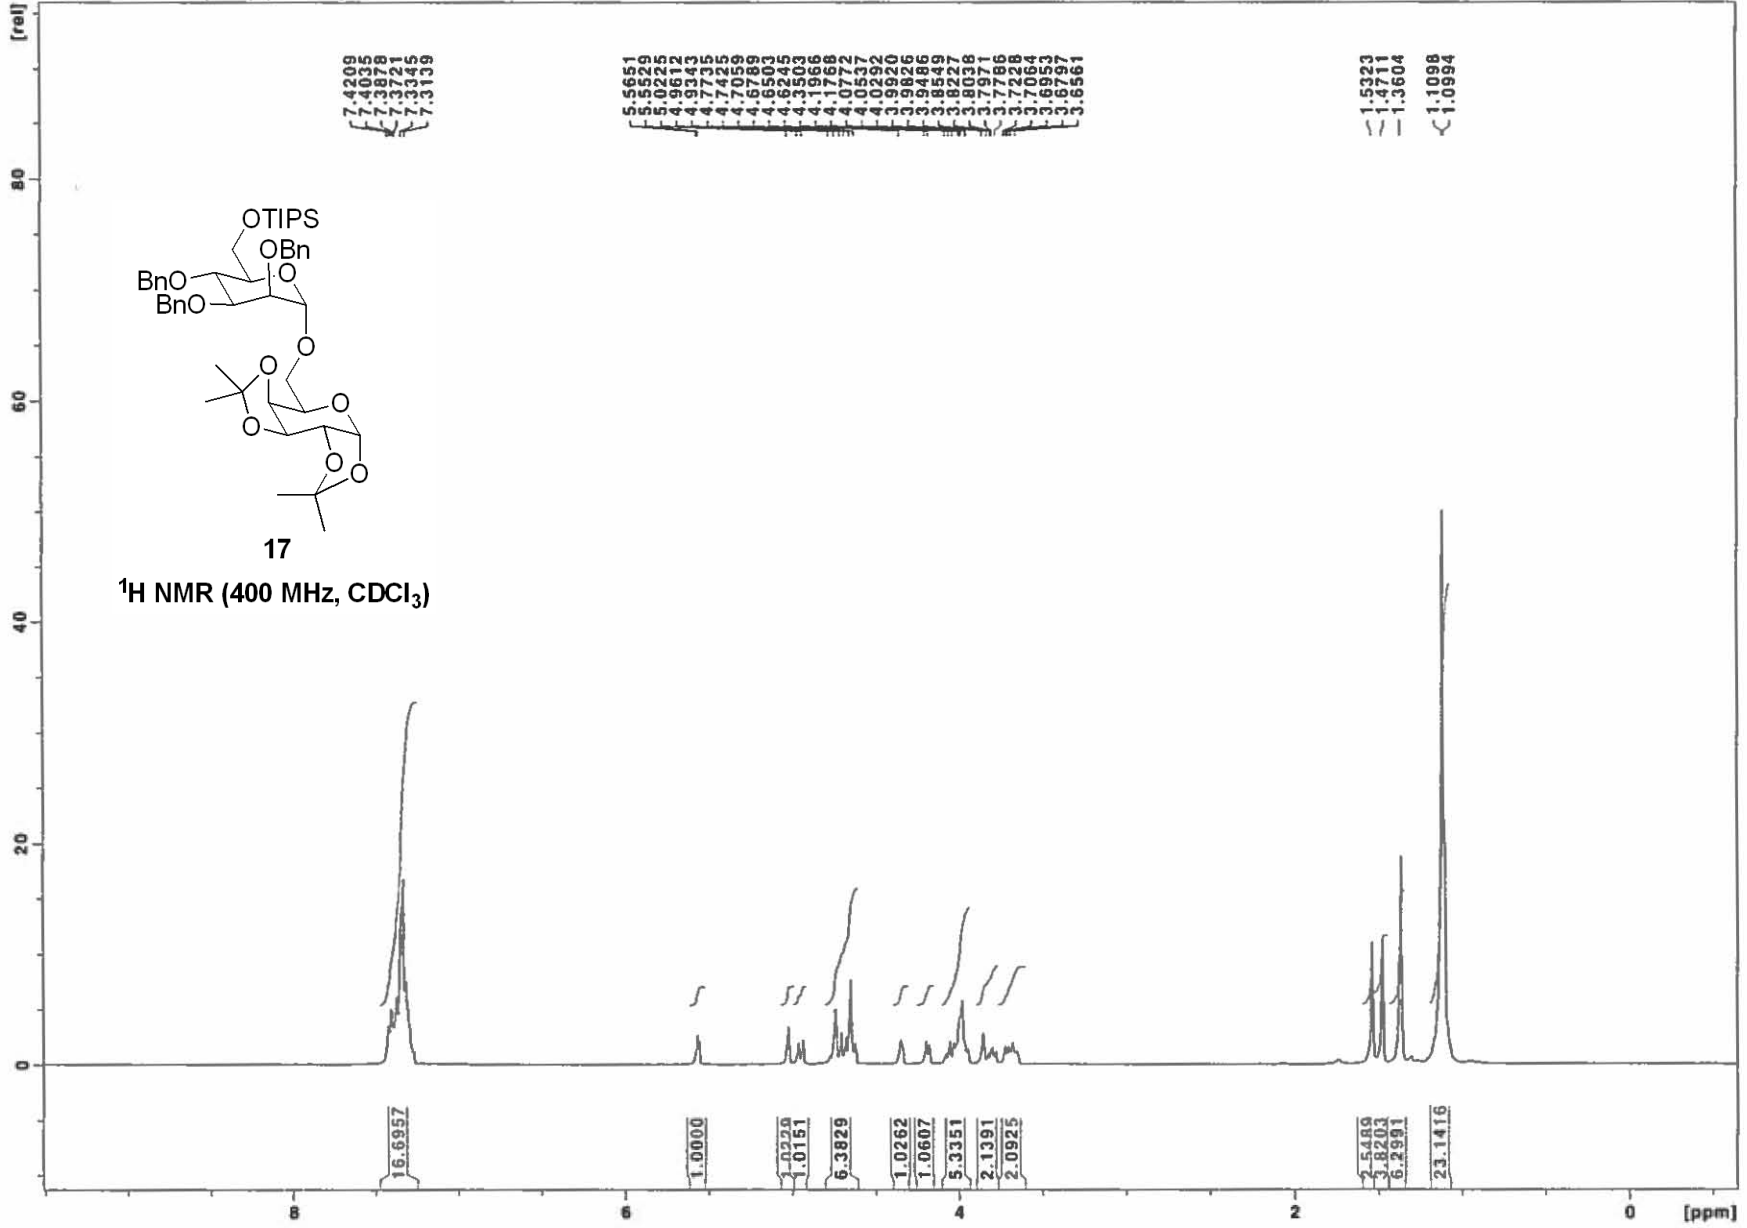

zgy-SGC-1 2 1 /opt/topspin1.3 gz619263

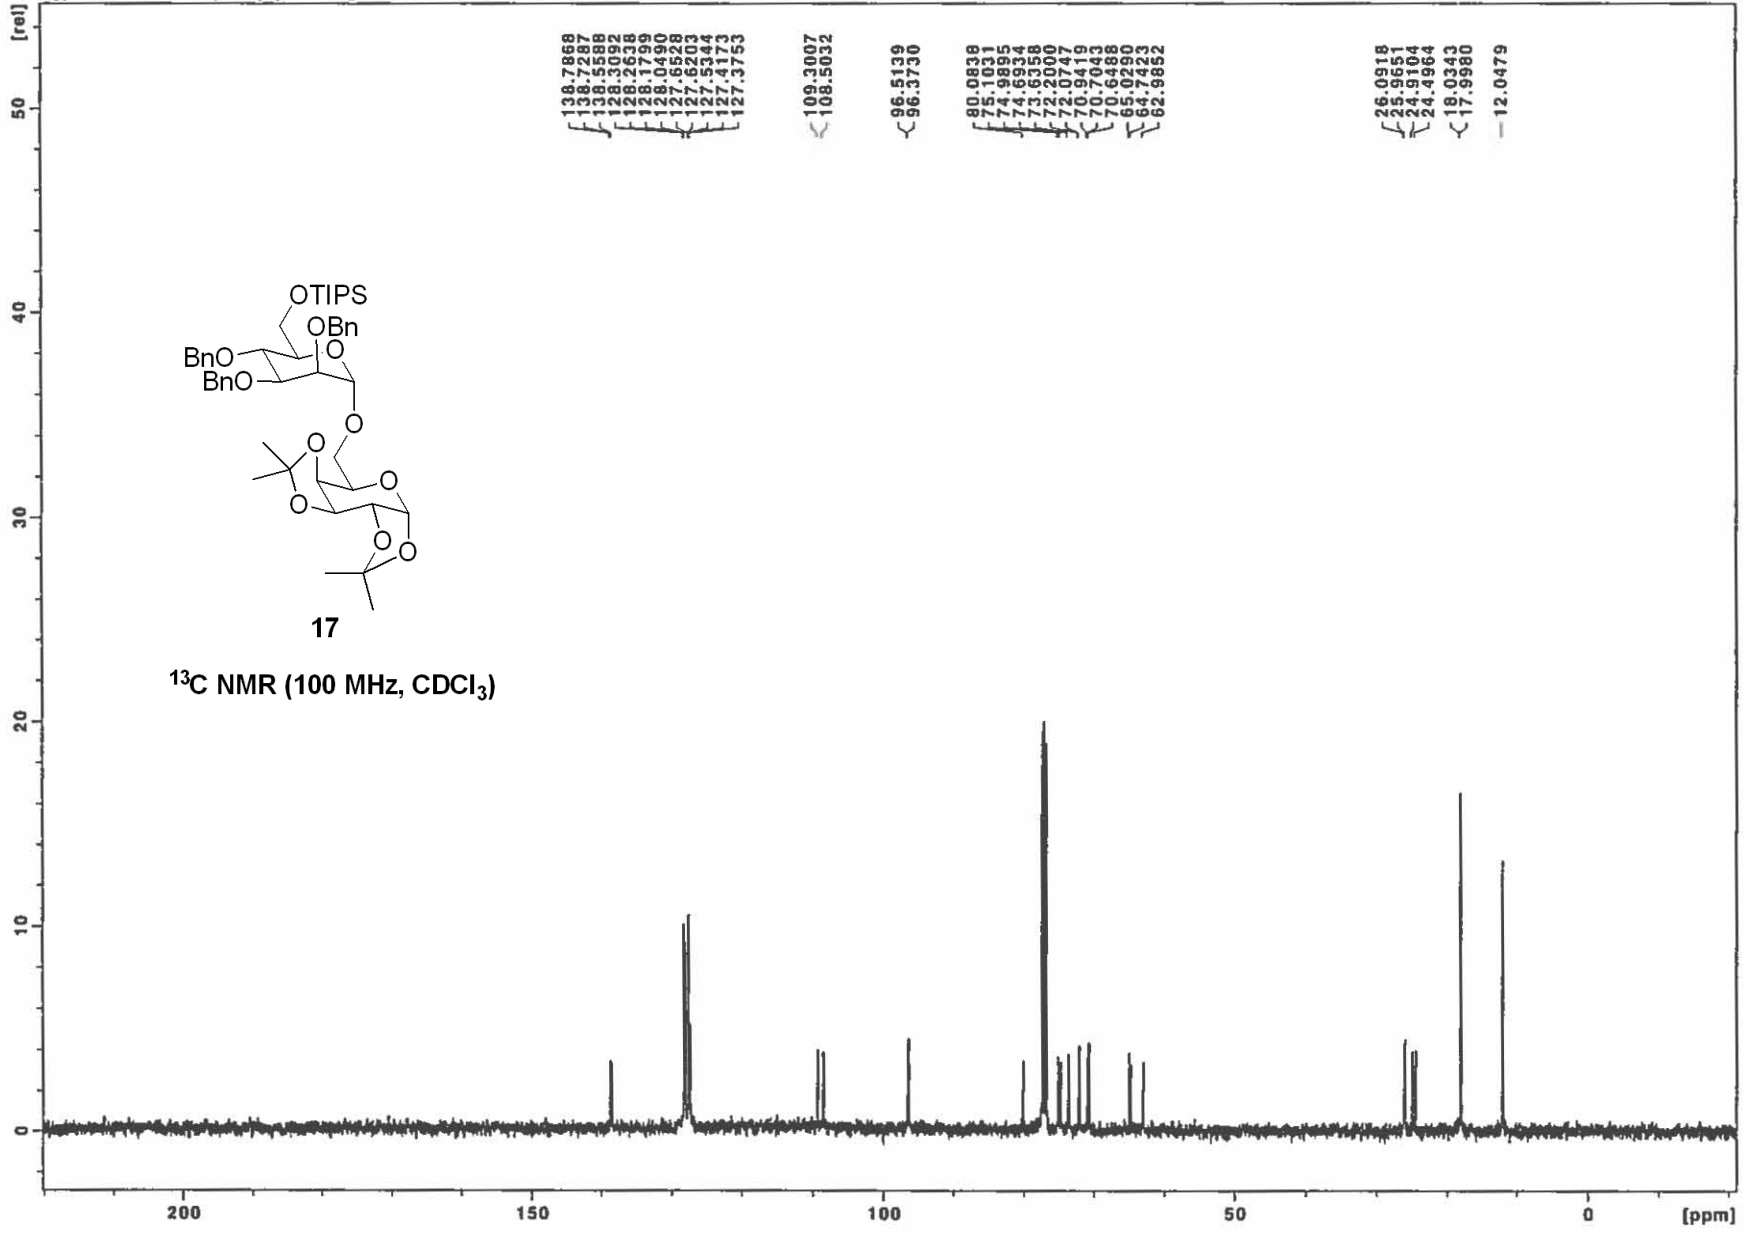

2gy-SG-4 1 1 /opt/topspin1.3 g:619263

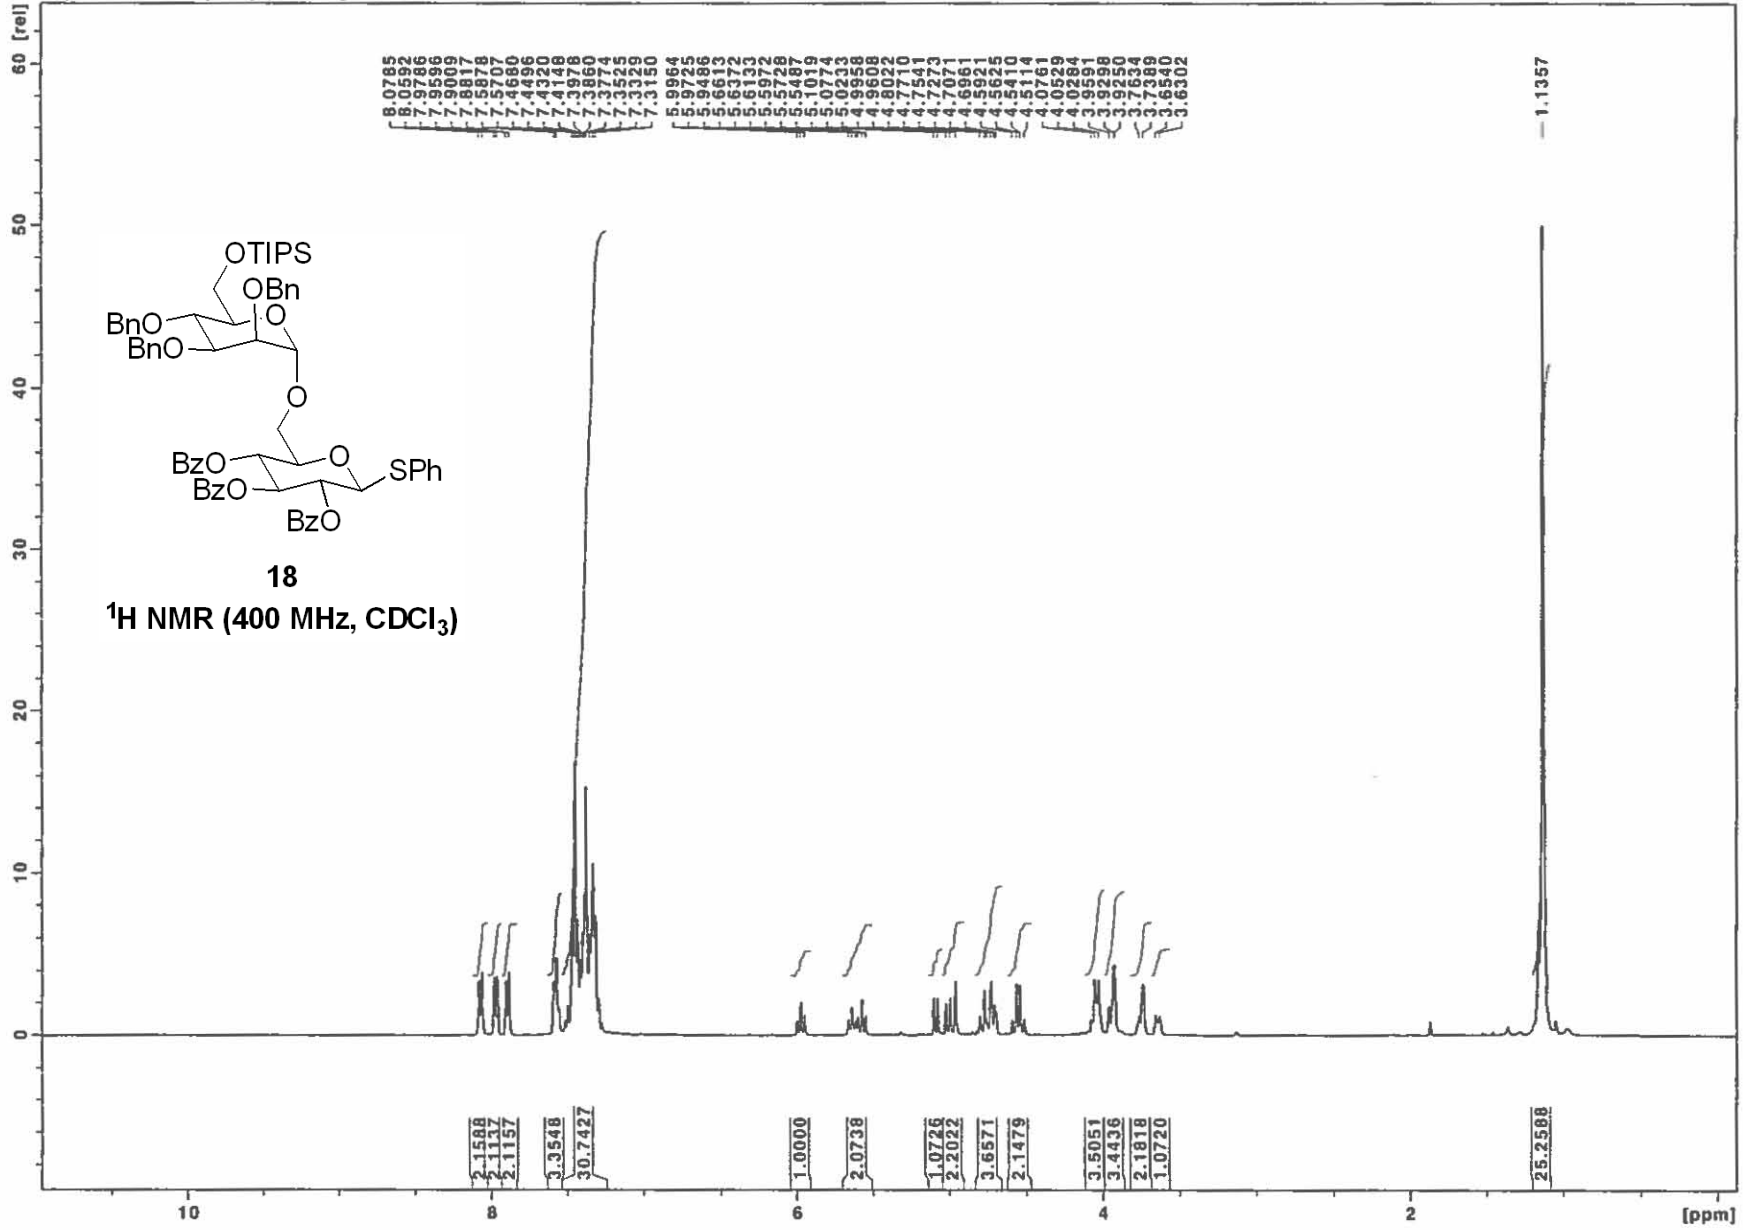

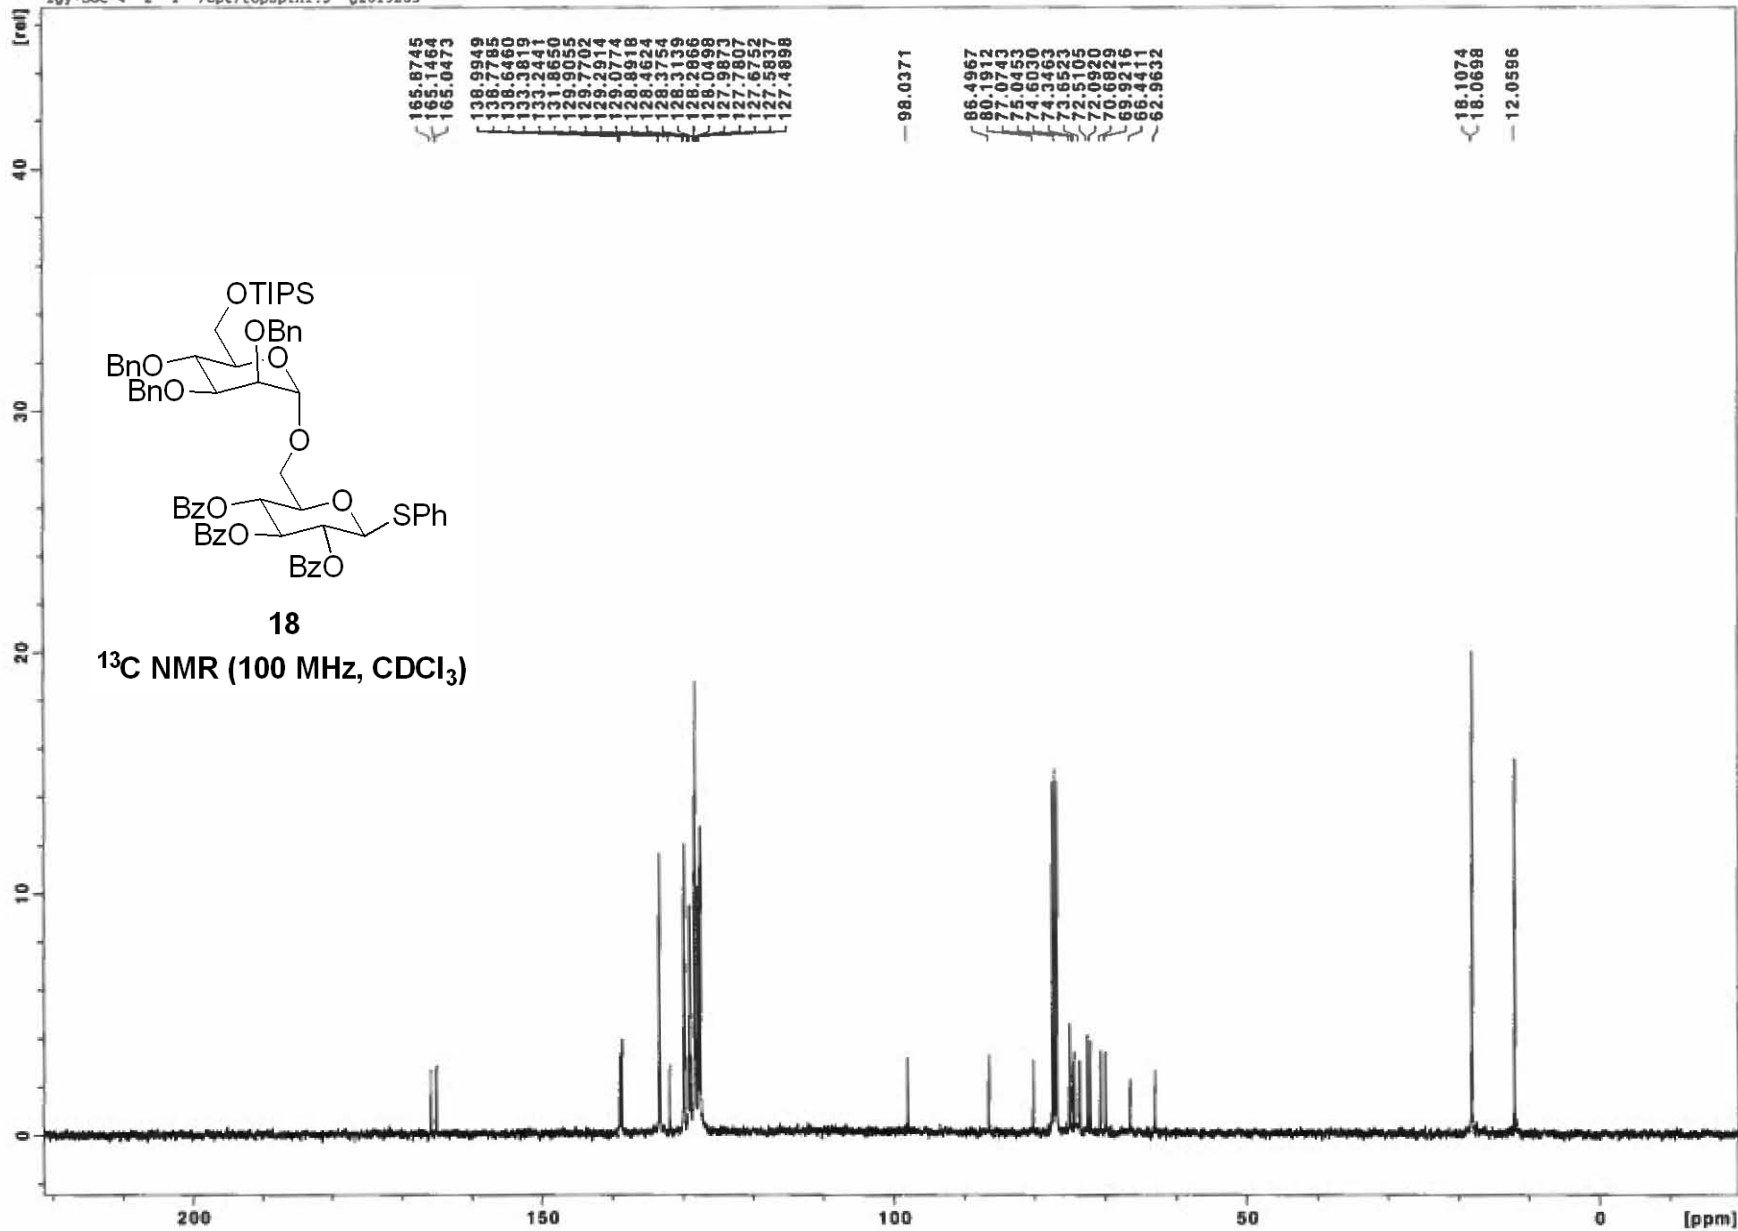

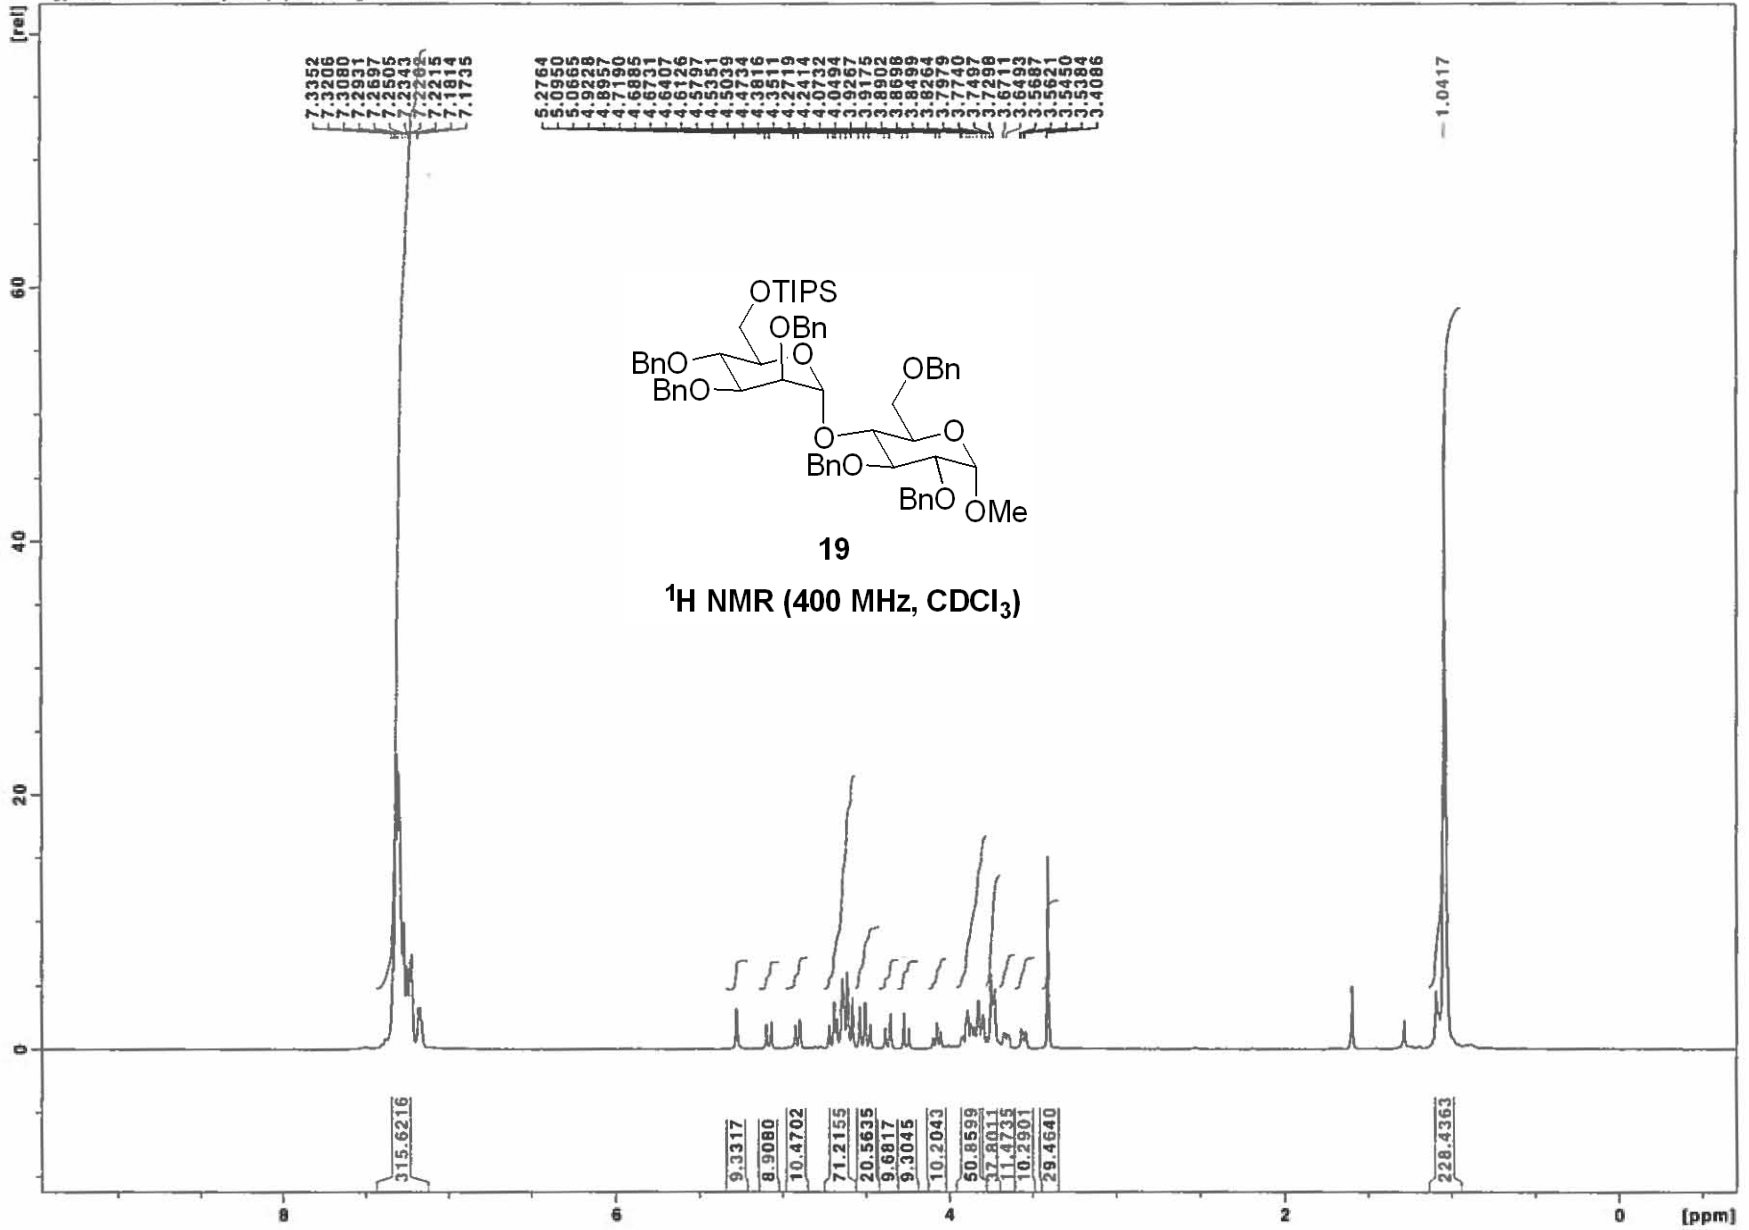

sgc-9-1 1 1 J:\gz619263

sgc-9-1

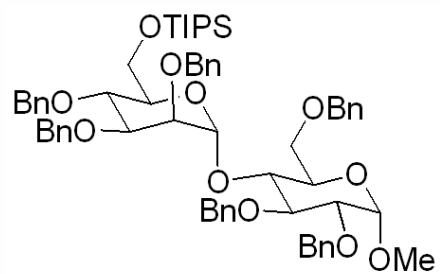

138.9408  
138.8312  
138.7641  
138.7391  
138.3113  
137.9655  
128.4597  
128.3891  
128.3003  
128.2802  
128.1522  
128.0047  
127.9753  
127.9461  
127.6174  
127.5068  
127.4697  
127.4283  
127.3724  
127.1169  
127.0442  
126.7692  
100.1847  
97.7851  
81.5686  
79.9713  
79.9385  
76.2151  
75.0262  
74.4131  
74.3179  
73.3156  
73.1995  
72.1503  
72.0164  
69.9344  
69.4645  
62.8638  
55.2438

18.0430  
18.0002  
-12.0320

**19**  
**<sup>13</sup>C NMR (125 MHz, CDCl<sub>3</sub>)**

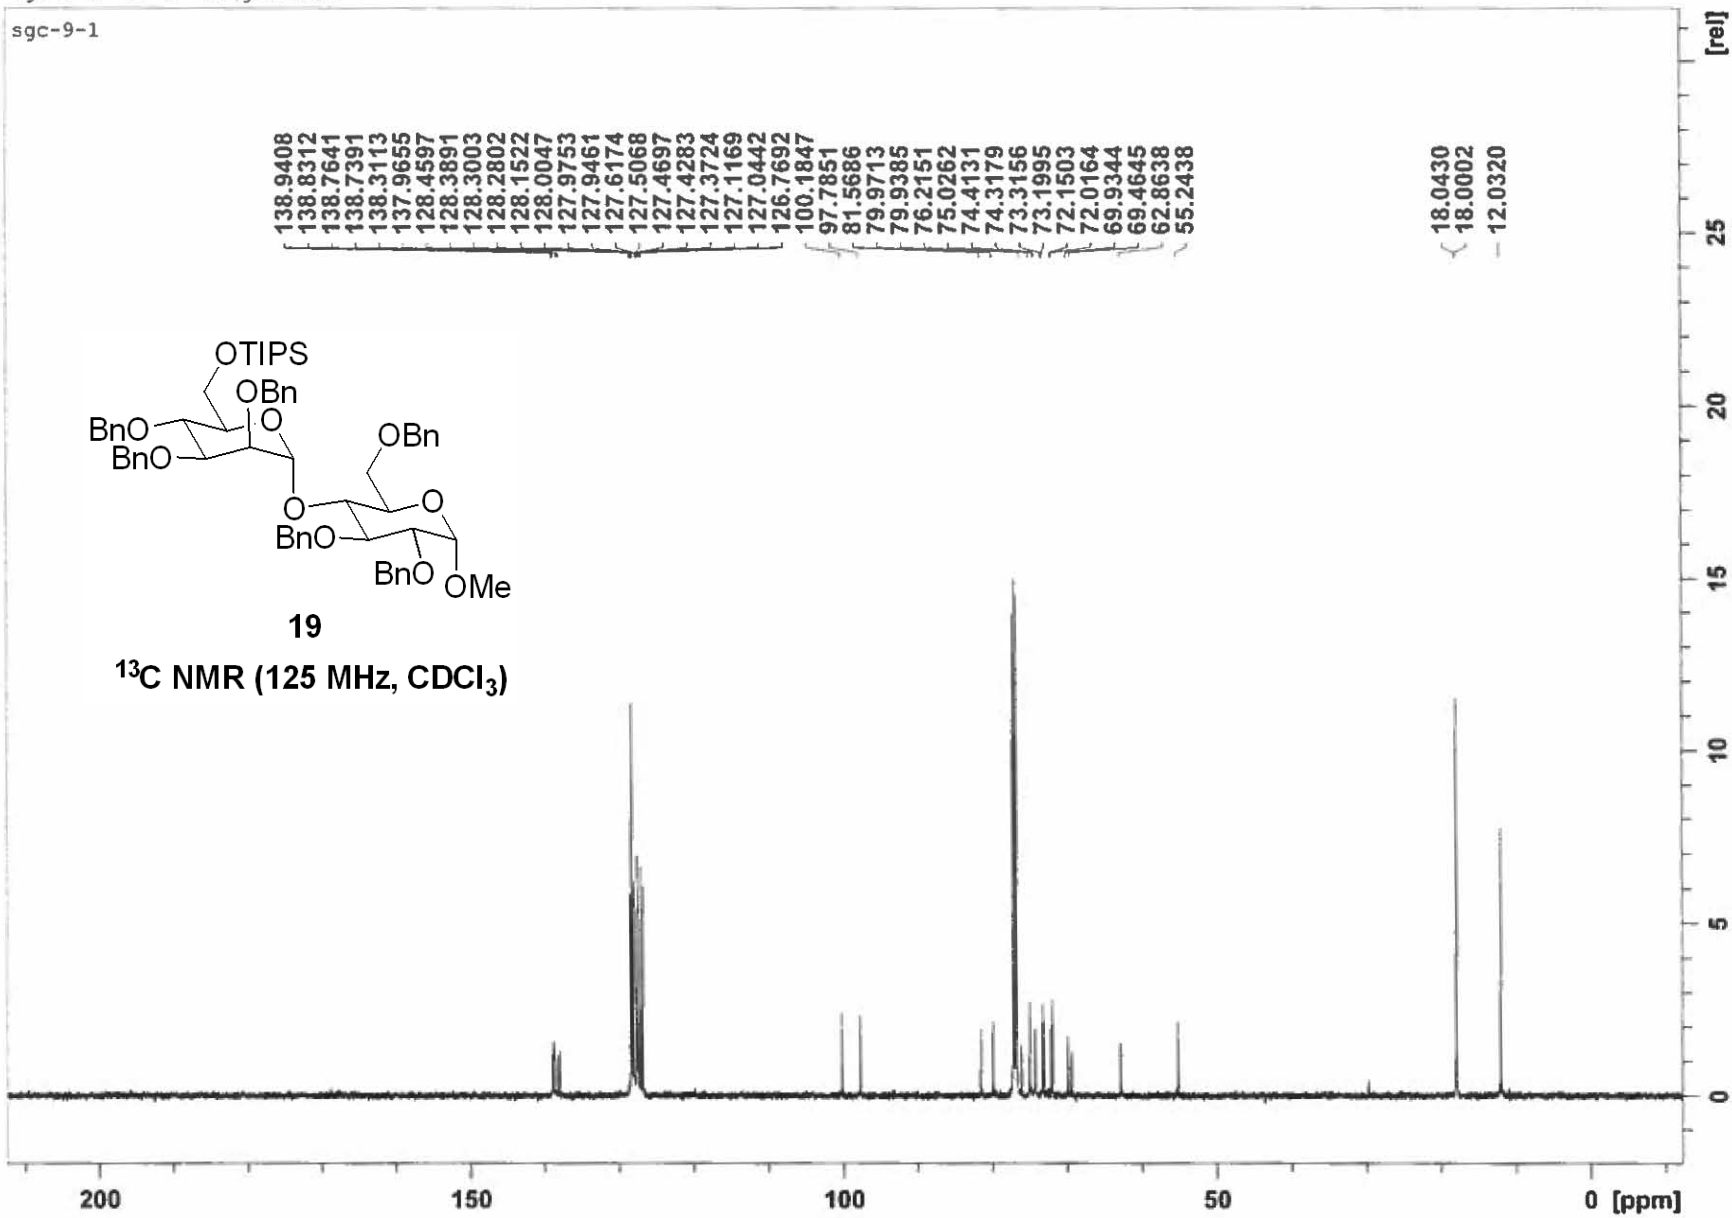

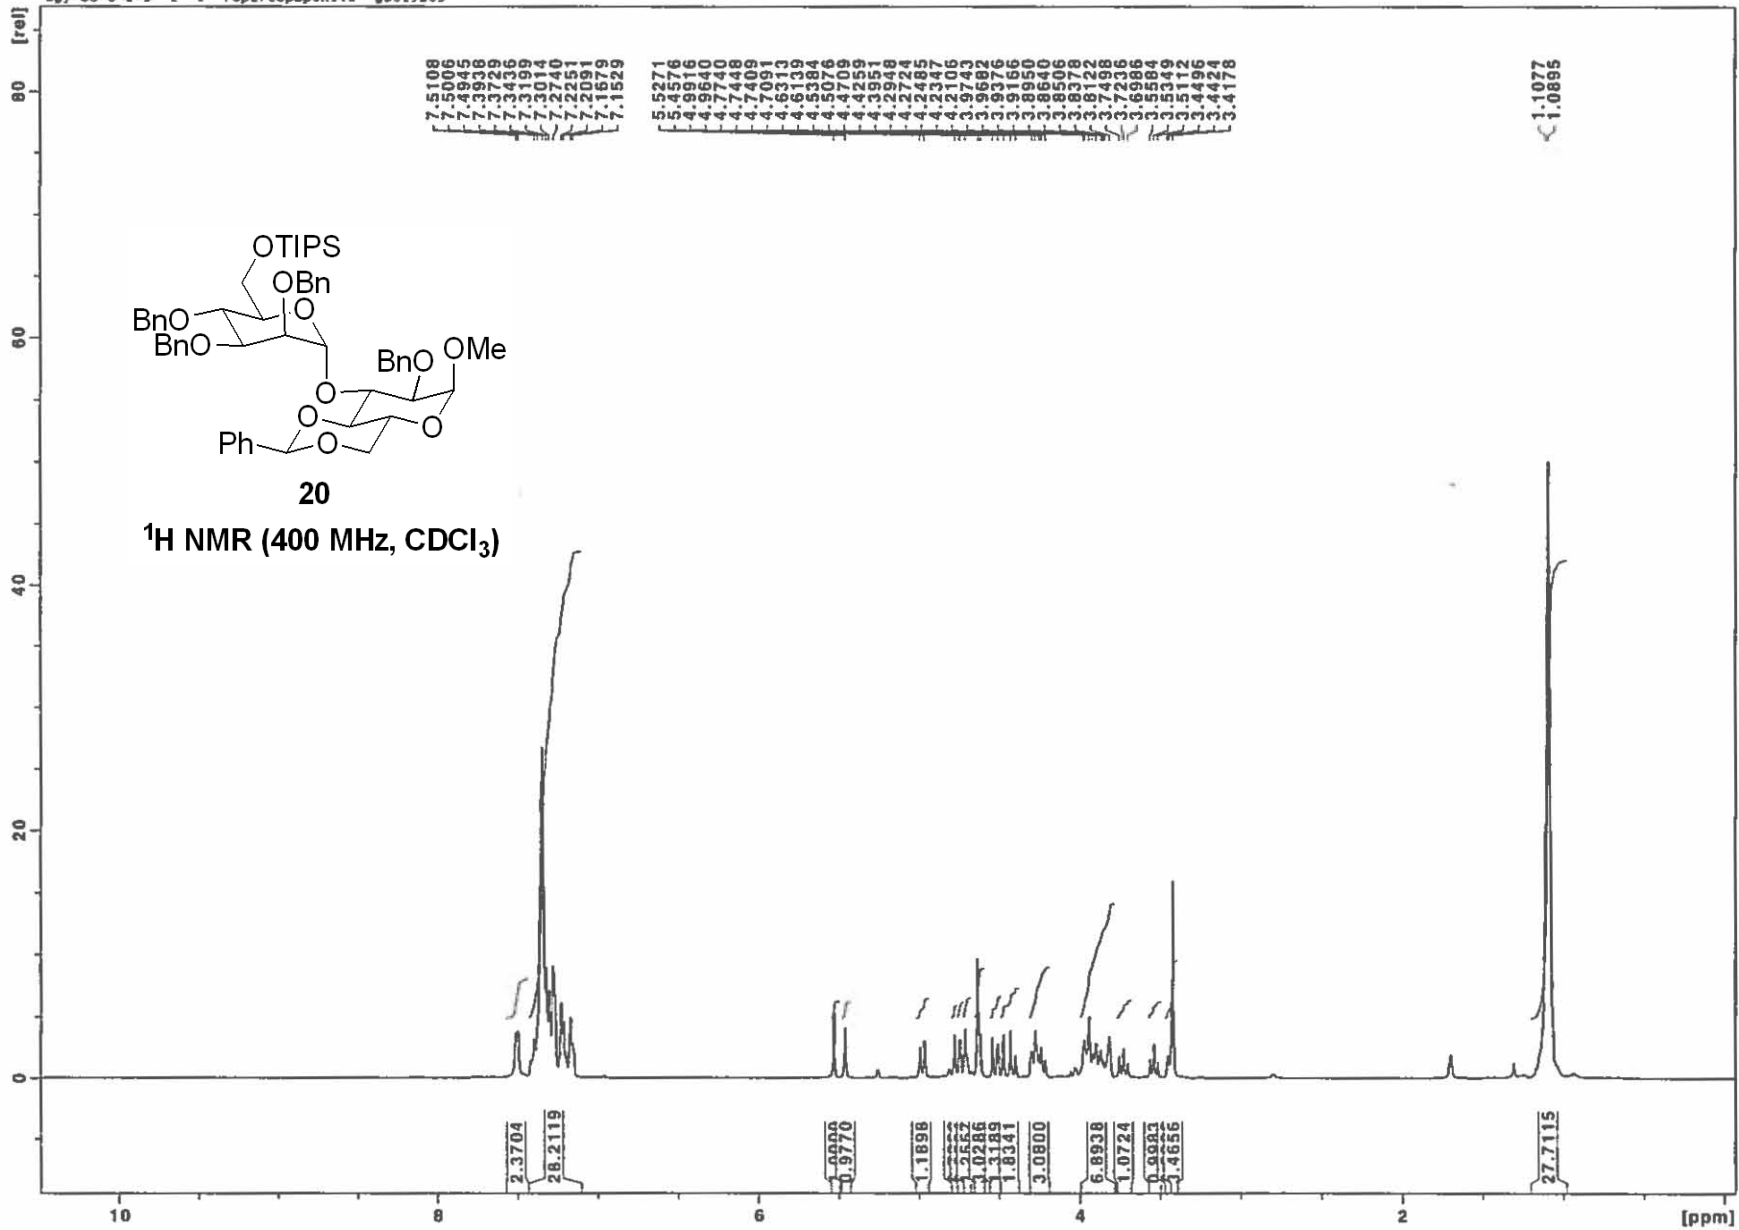

sgc-8-1 1 1 J:\gz619263

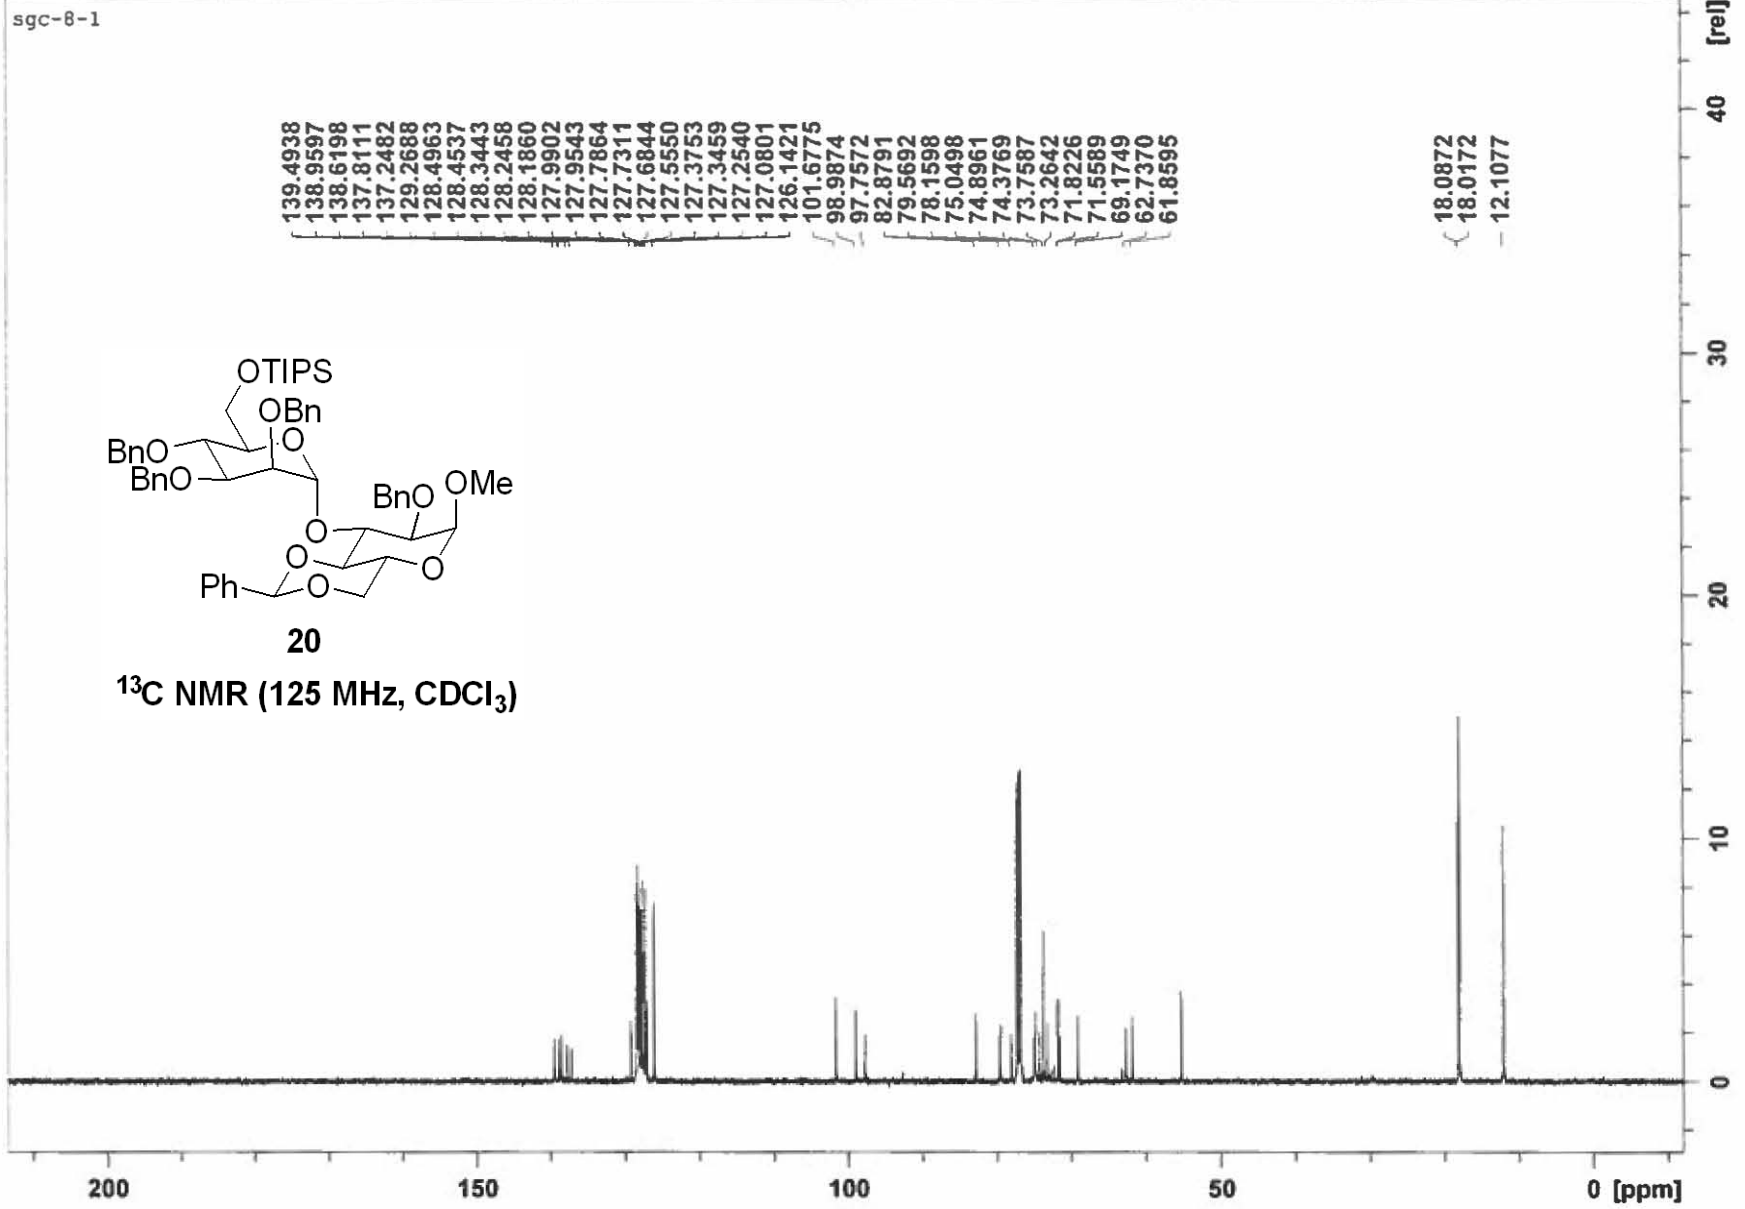



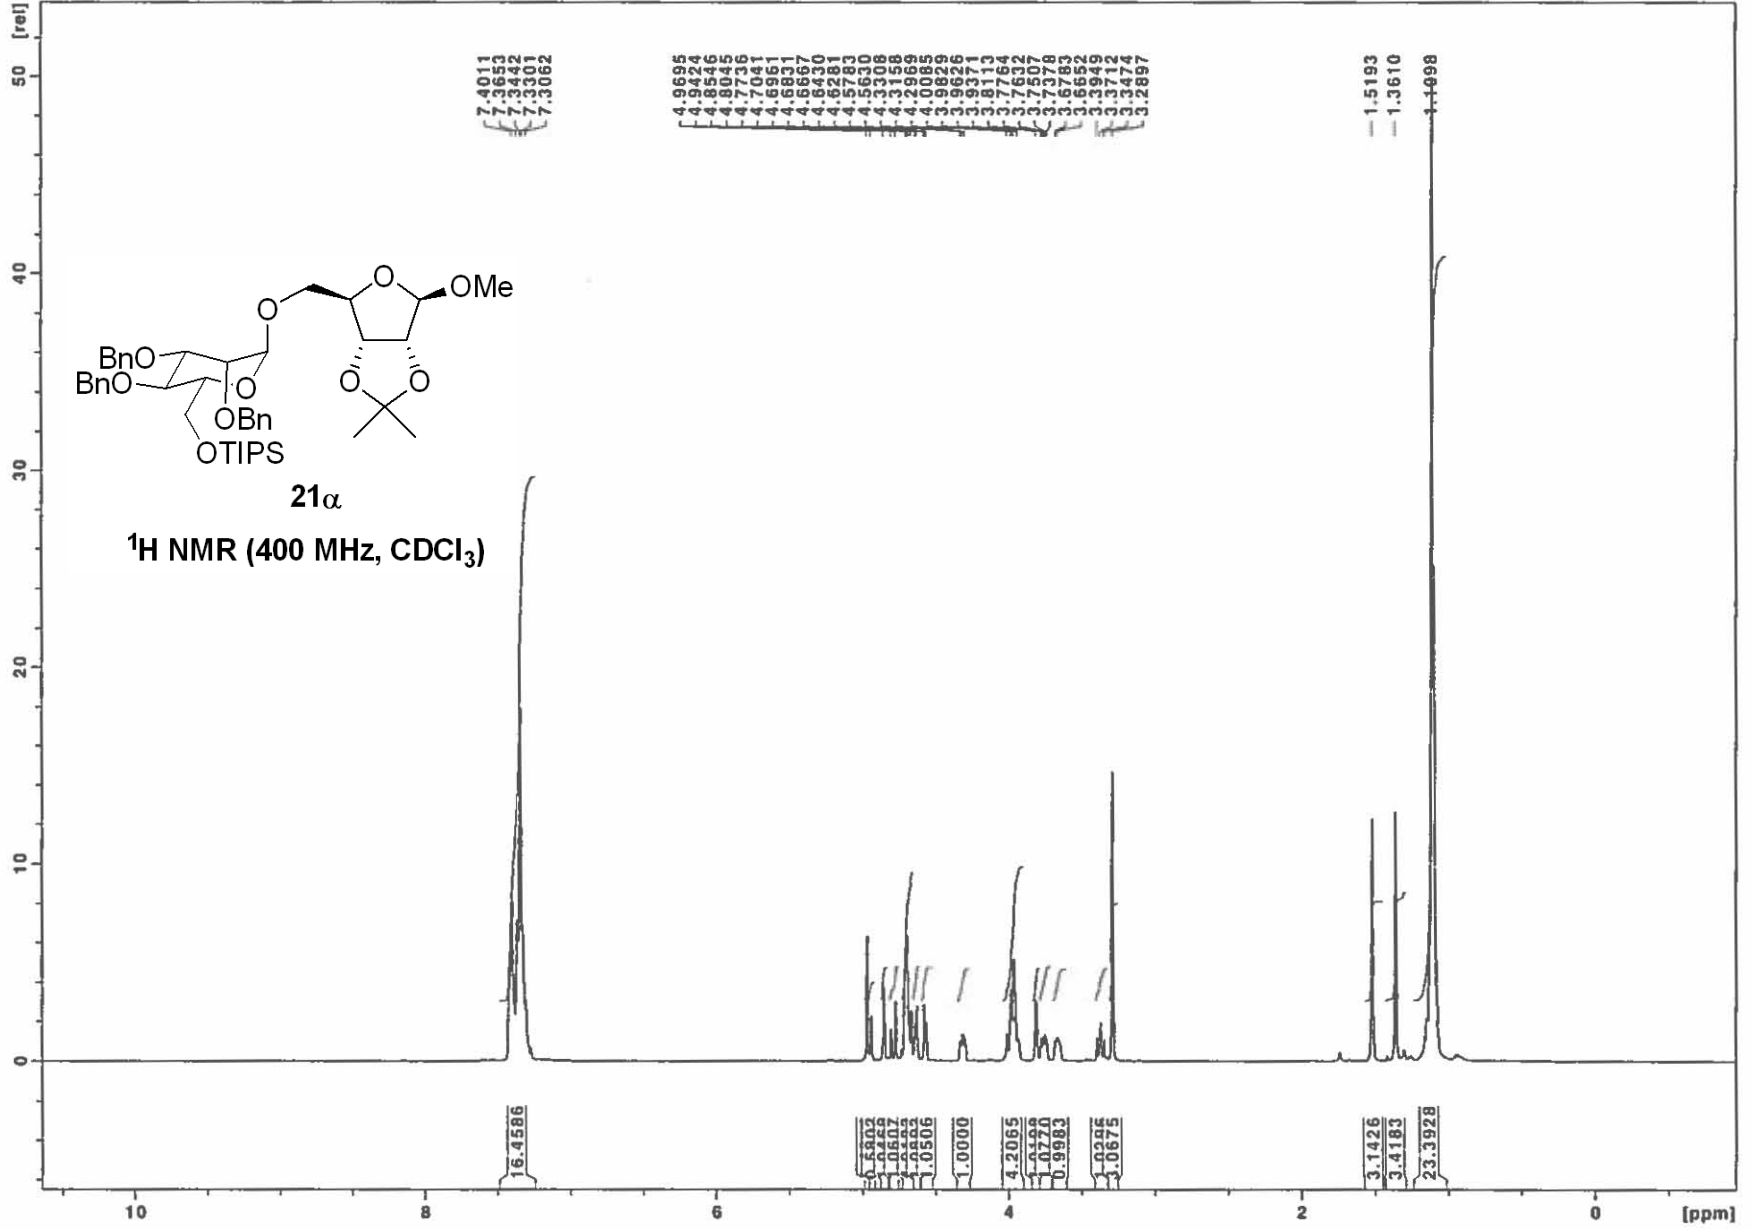

zgy-SGC-6-a 2 1 /opt/topspin1.3 gz619263

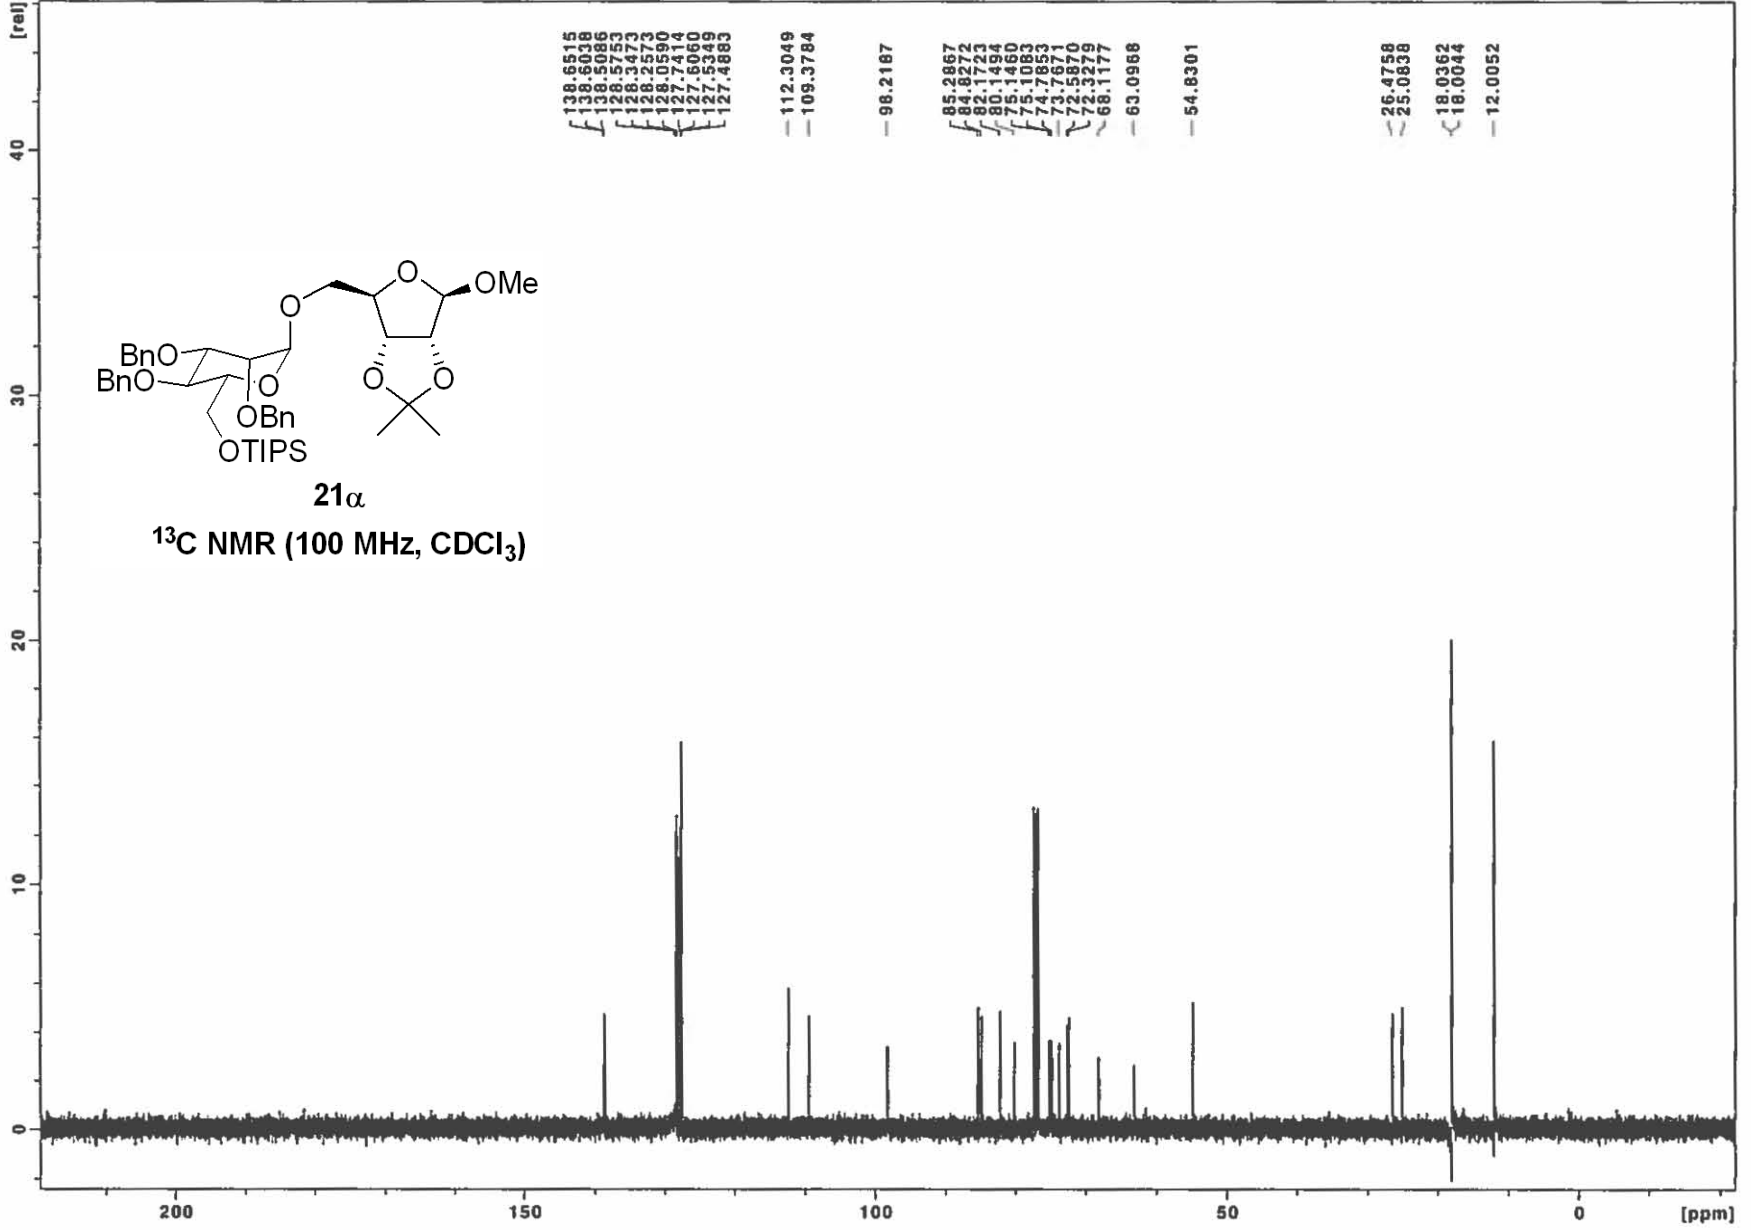

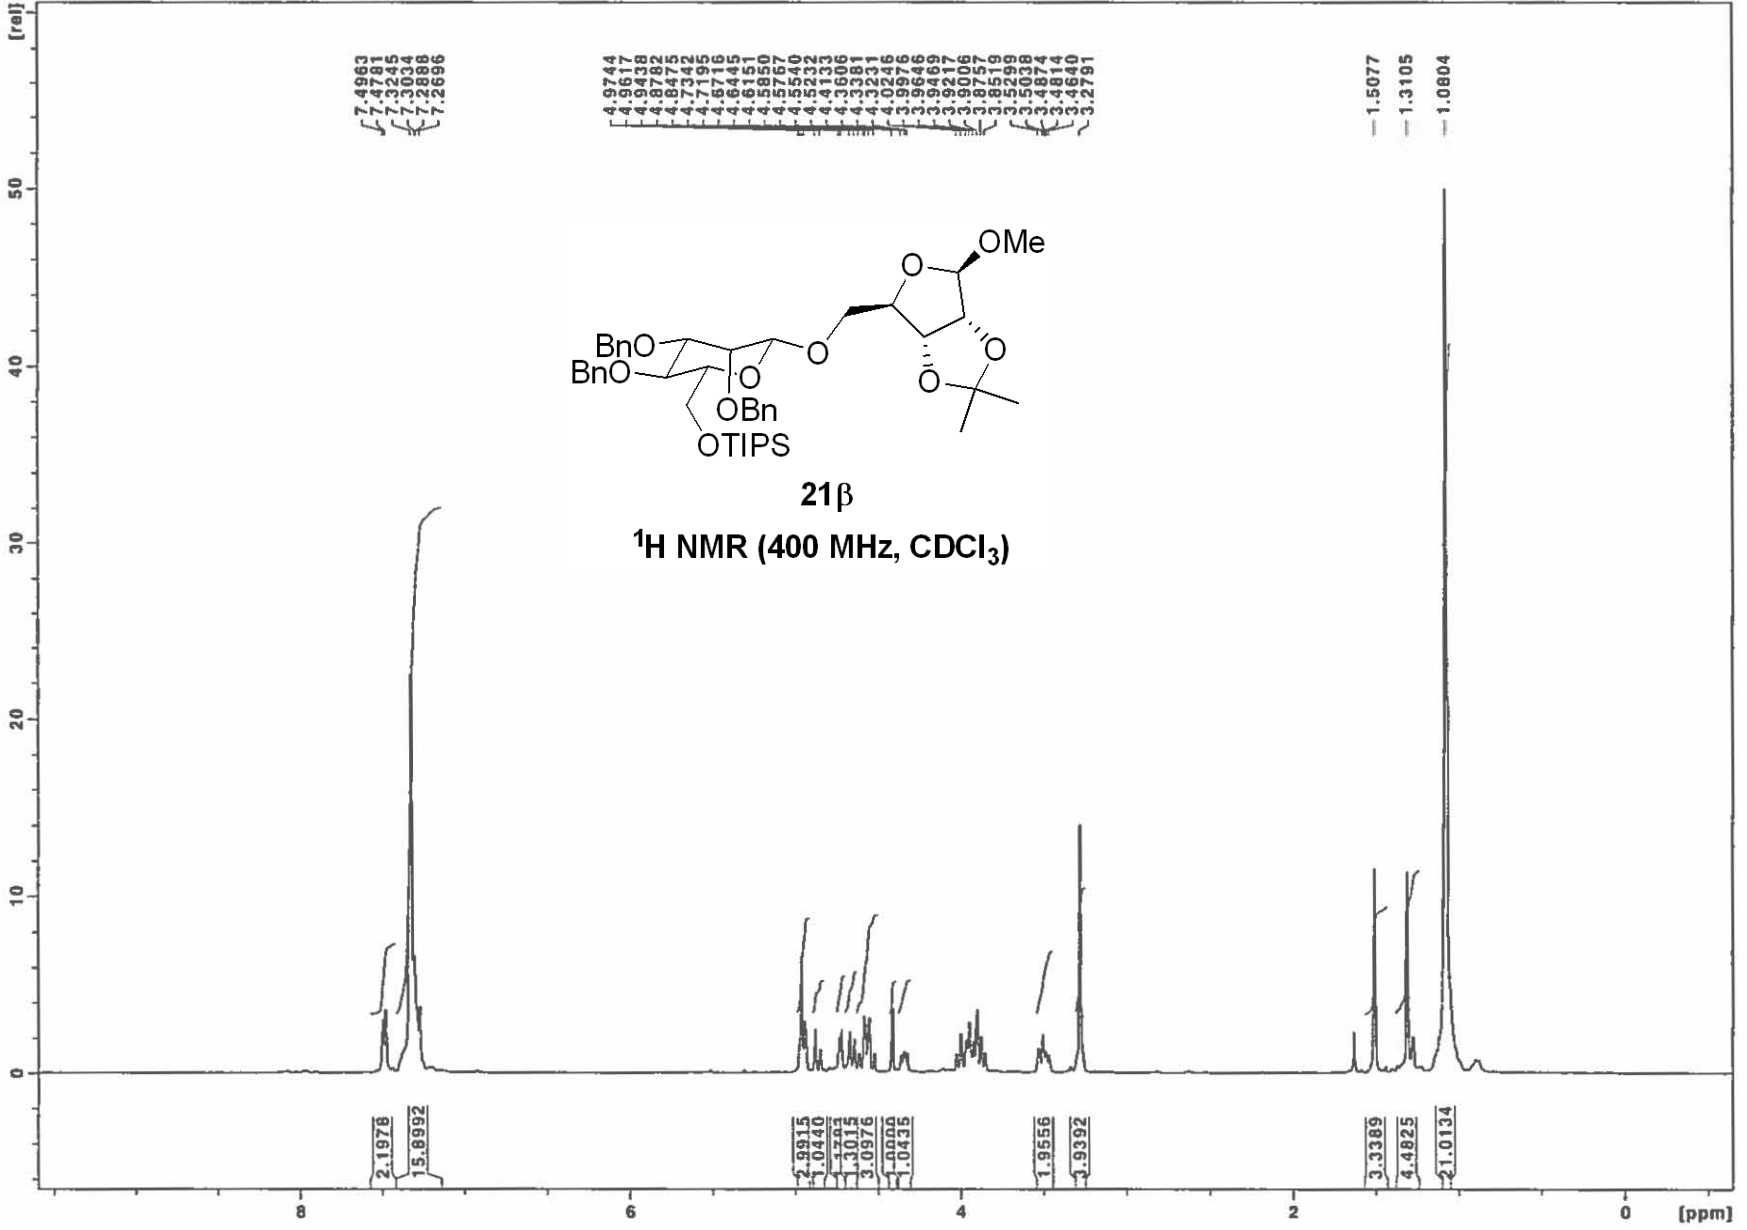

zgy-SGC-6-2 2 1 /opt/topspin1.3 gz619263

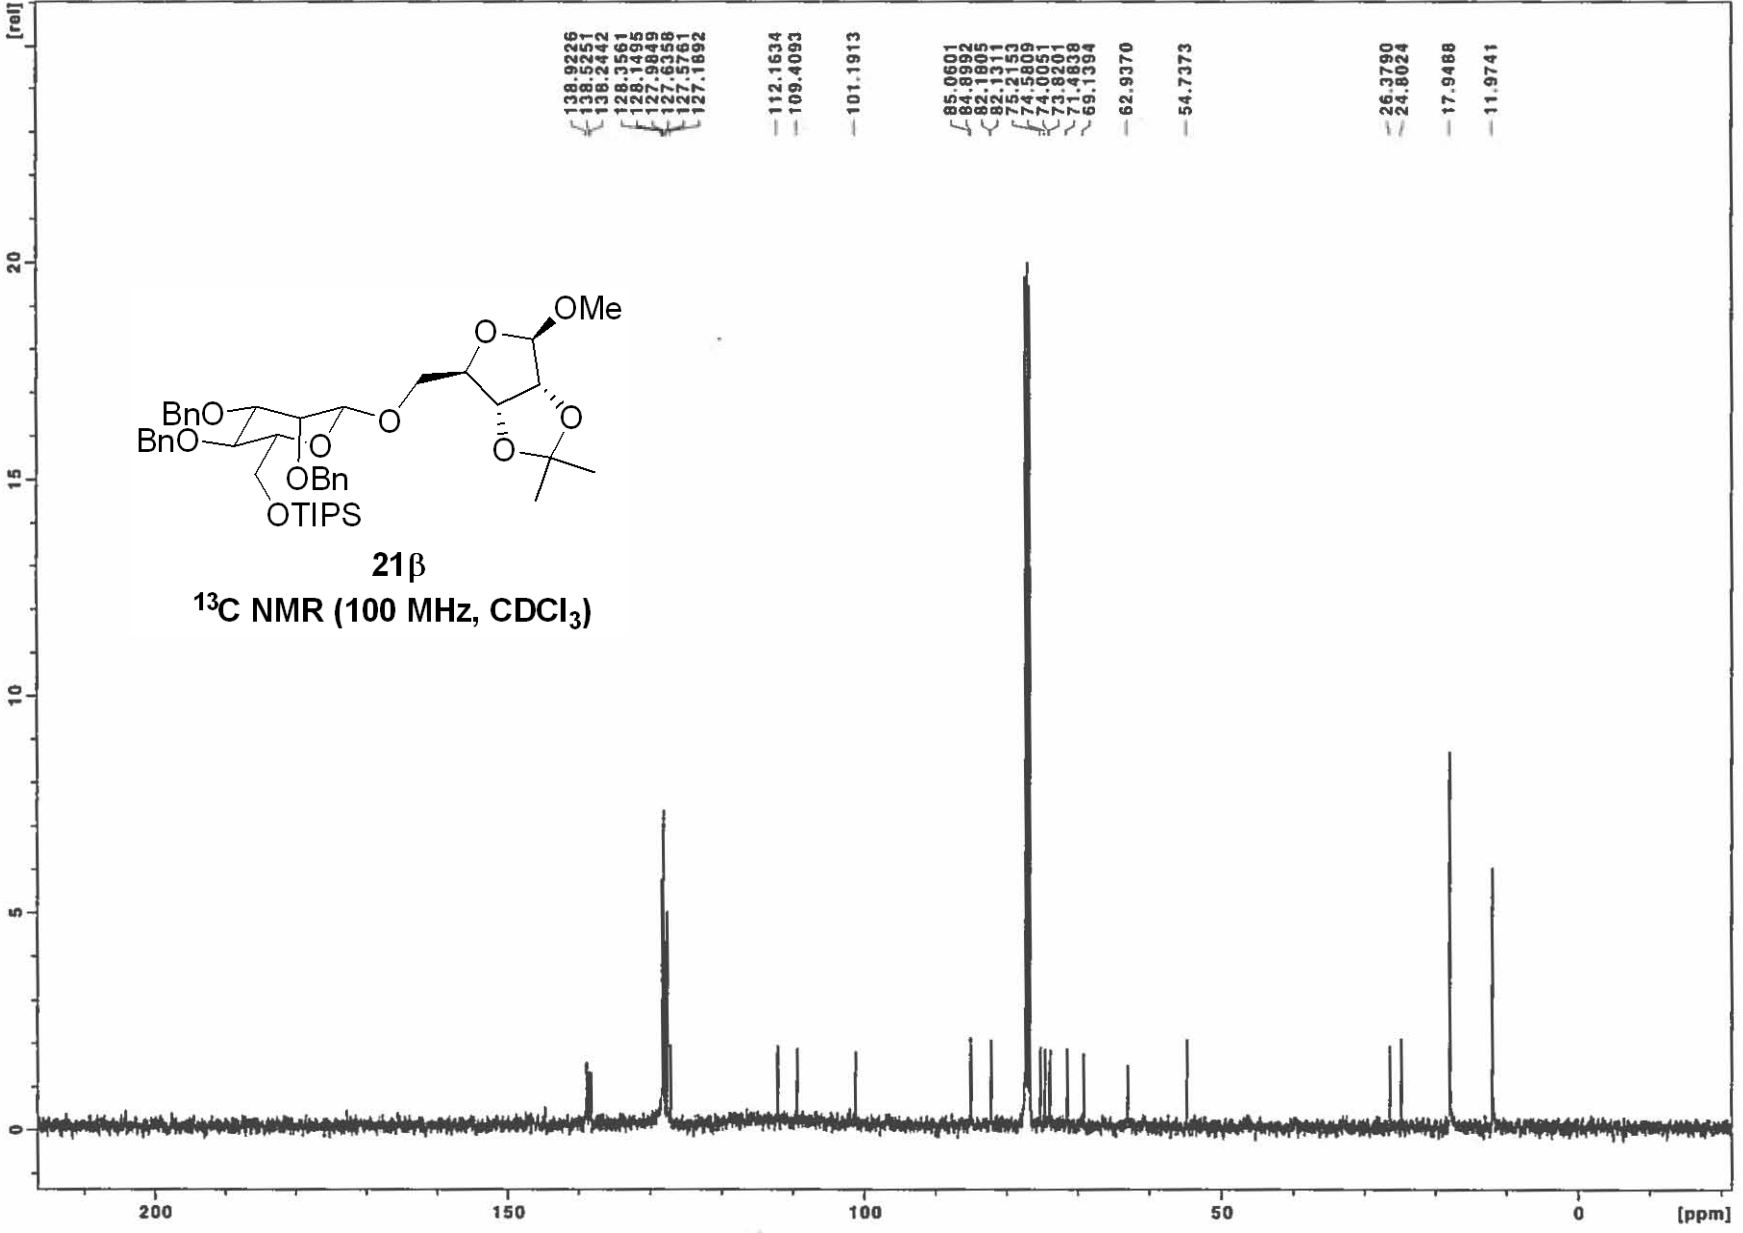

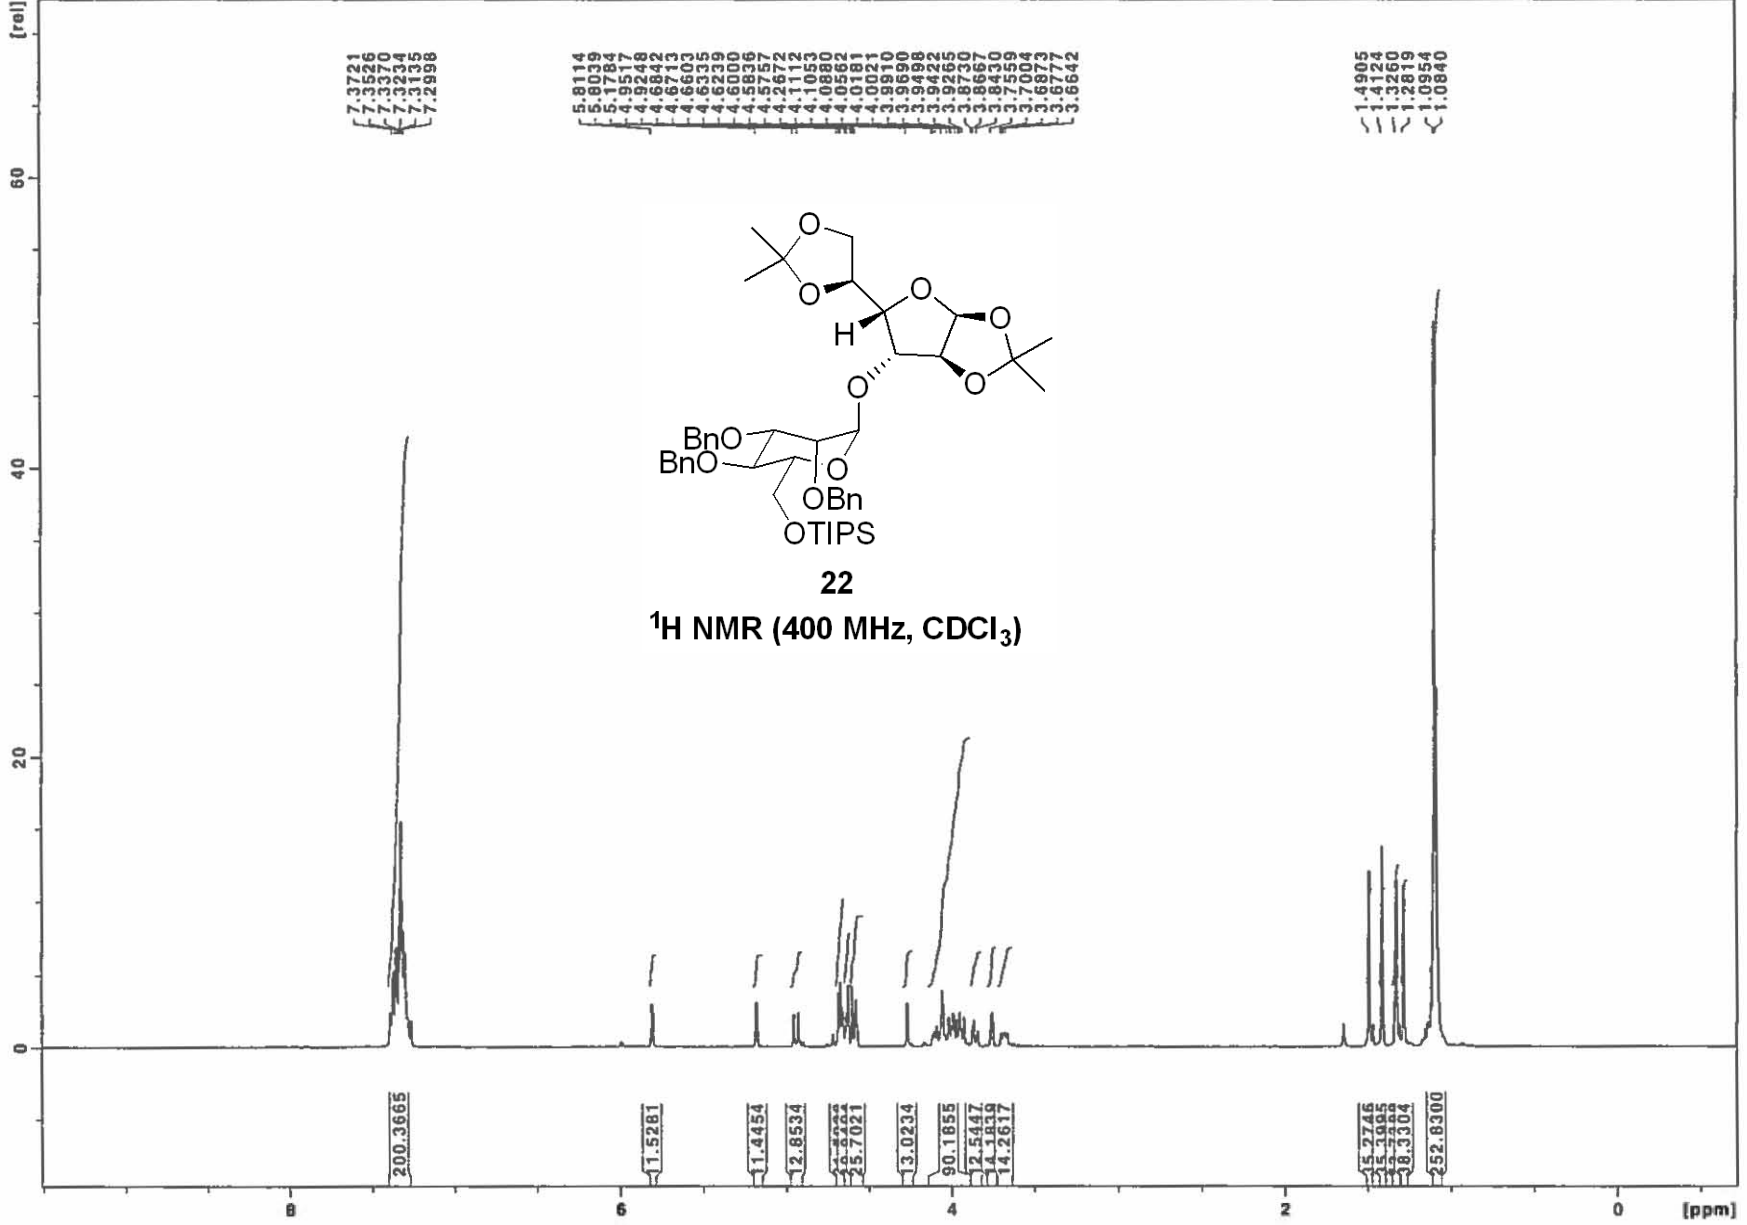

sgc-19 1 1 J:\gz619263

sgc-19

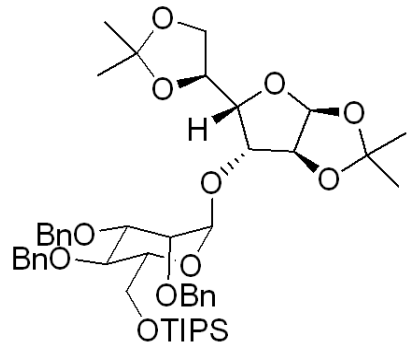

22

$^{13}\text{C}$  NMR (125 MHz,  $\text{CDCl}_3$ )

138.5189  
138.5070  
138.3280  
128.4354  
128.3657  
128.2866  
128.2139  
127.7575  
127.6765  
127.6082  
127.5812  
111.9743  
109.2780  
105.3108  
98.7179  
83.9228  
81.5238  
80.3314  
79.6952  
75.3613  
74.8008  
74.7094  
74.5393  
72.5953  
72.2416  
72.1676  
67.8058  
63.3649

26.9560  
26.8795  
26.2534  
25.5523  
18.0771  
18.0466  
12.0529

[rel]

40

30

20

10

0

200

150

100

50

0

[ppm]

zgy-SG-7-1 1 1 /opt/topspin1.3 gz619263

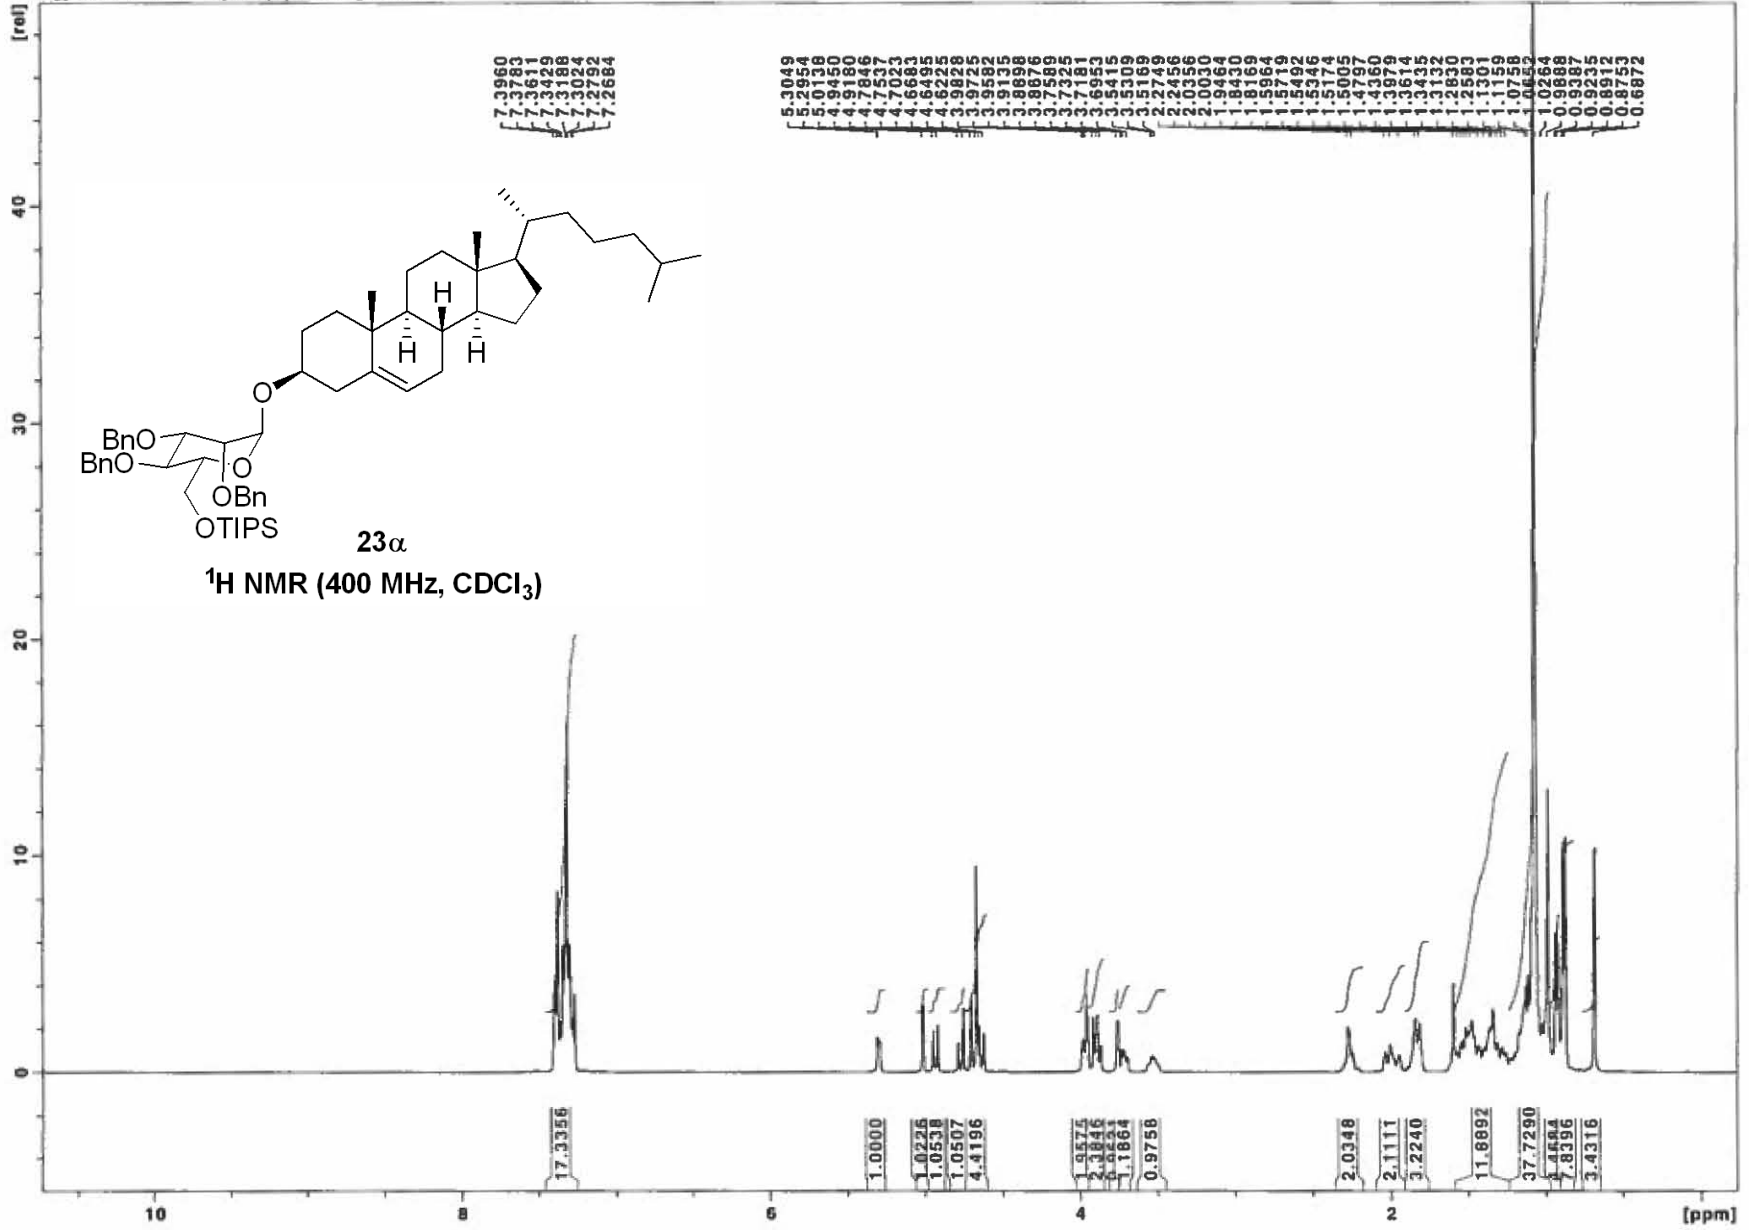

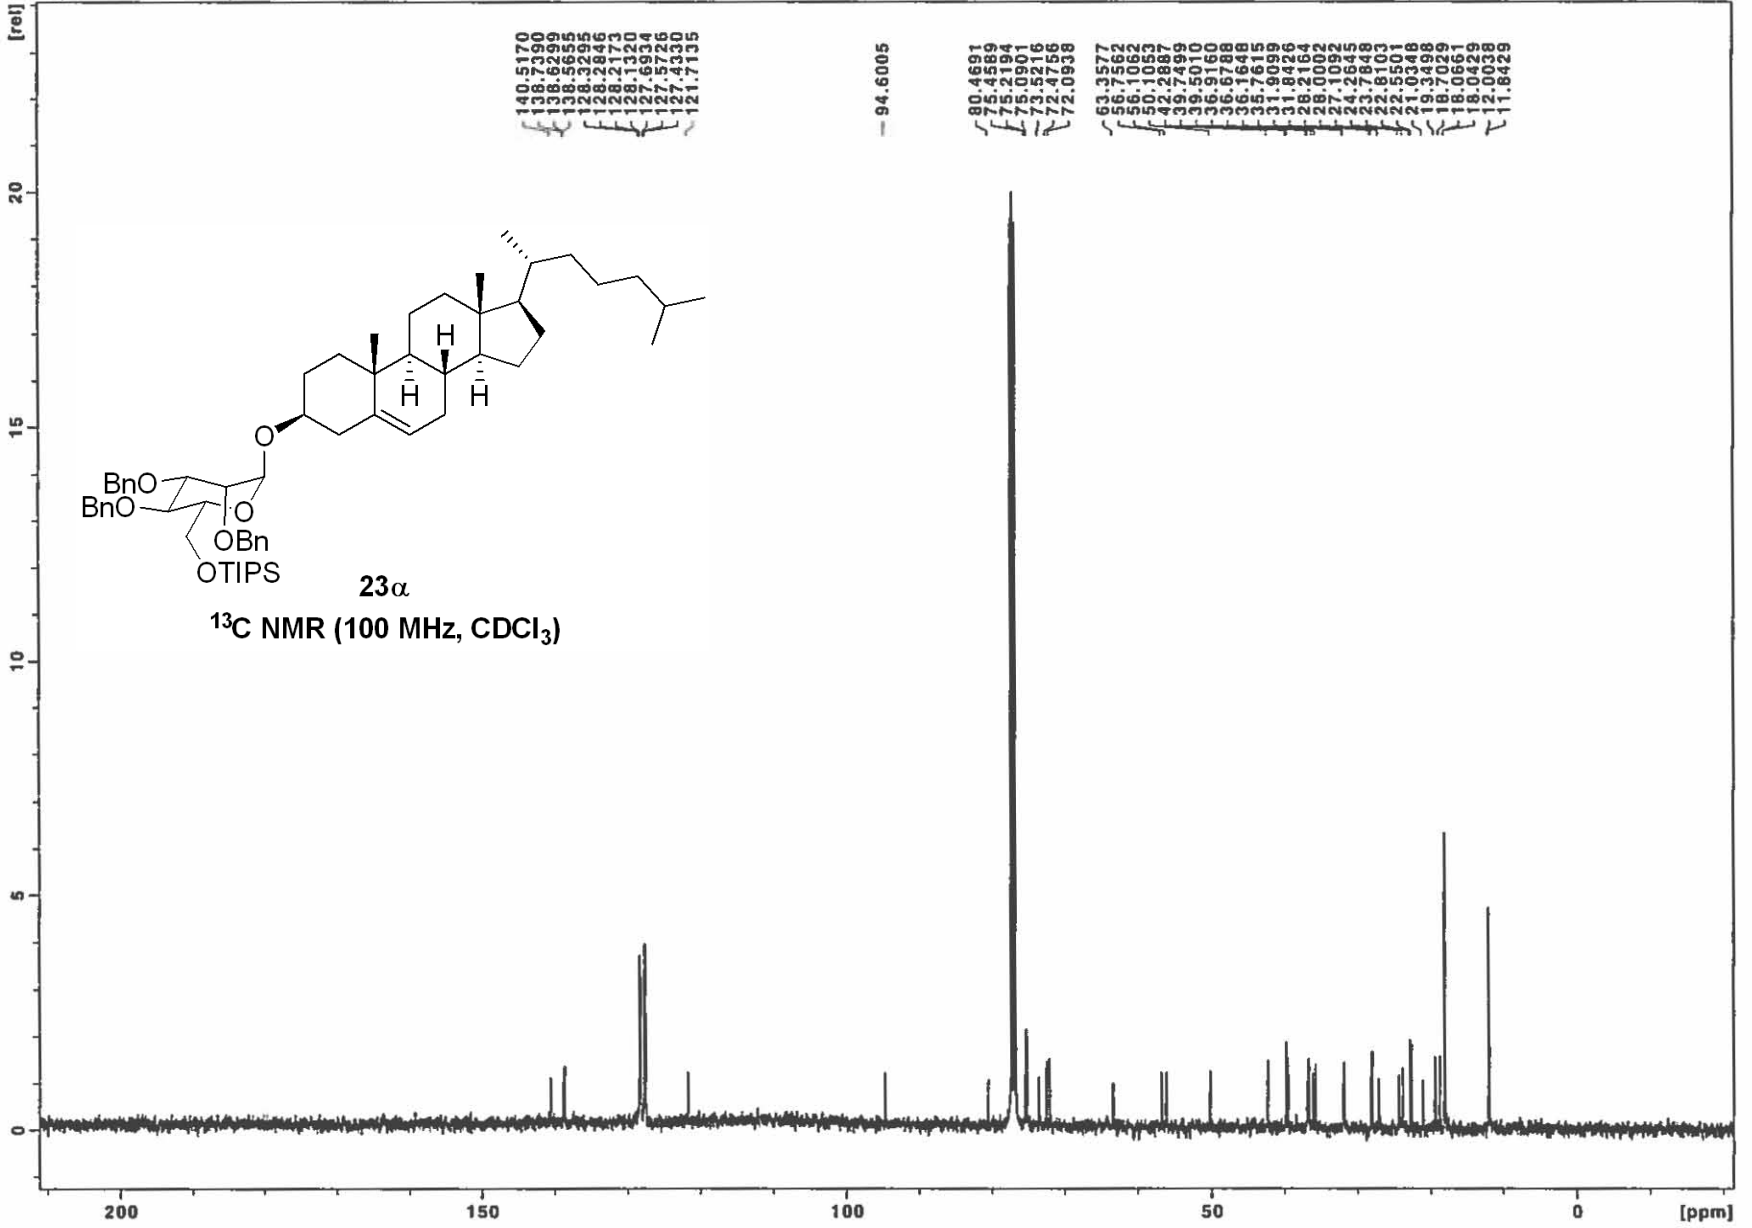



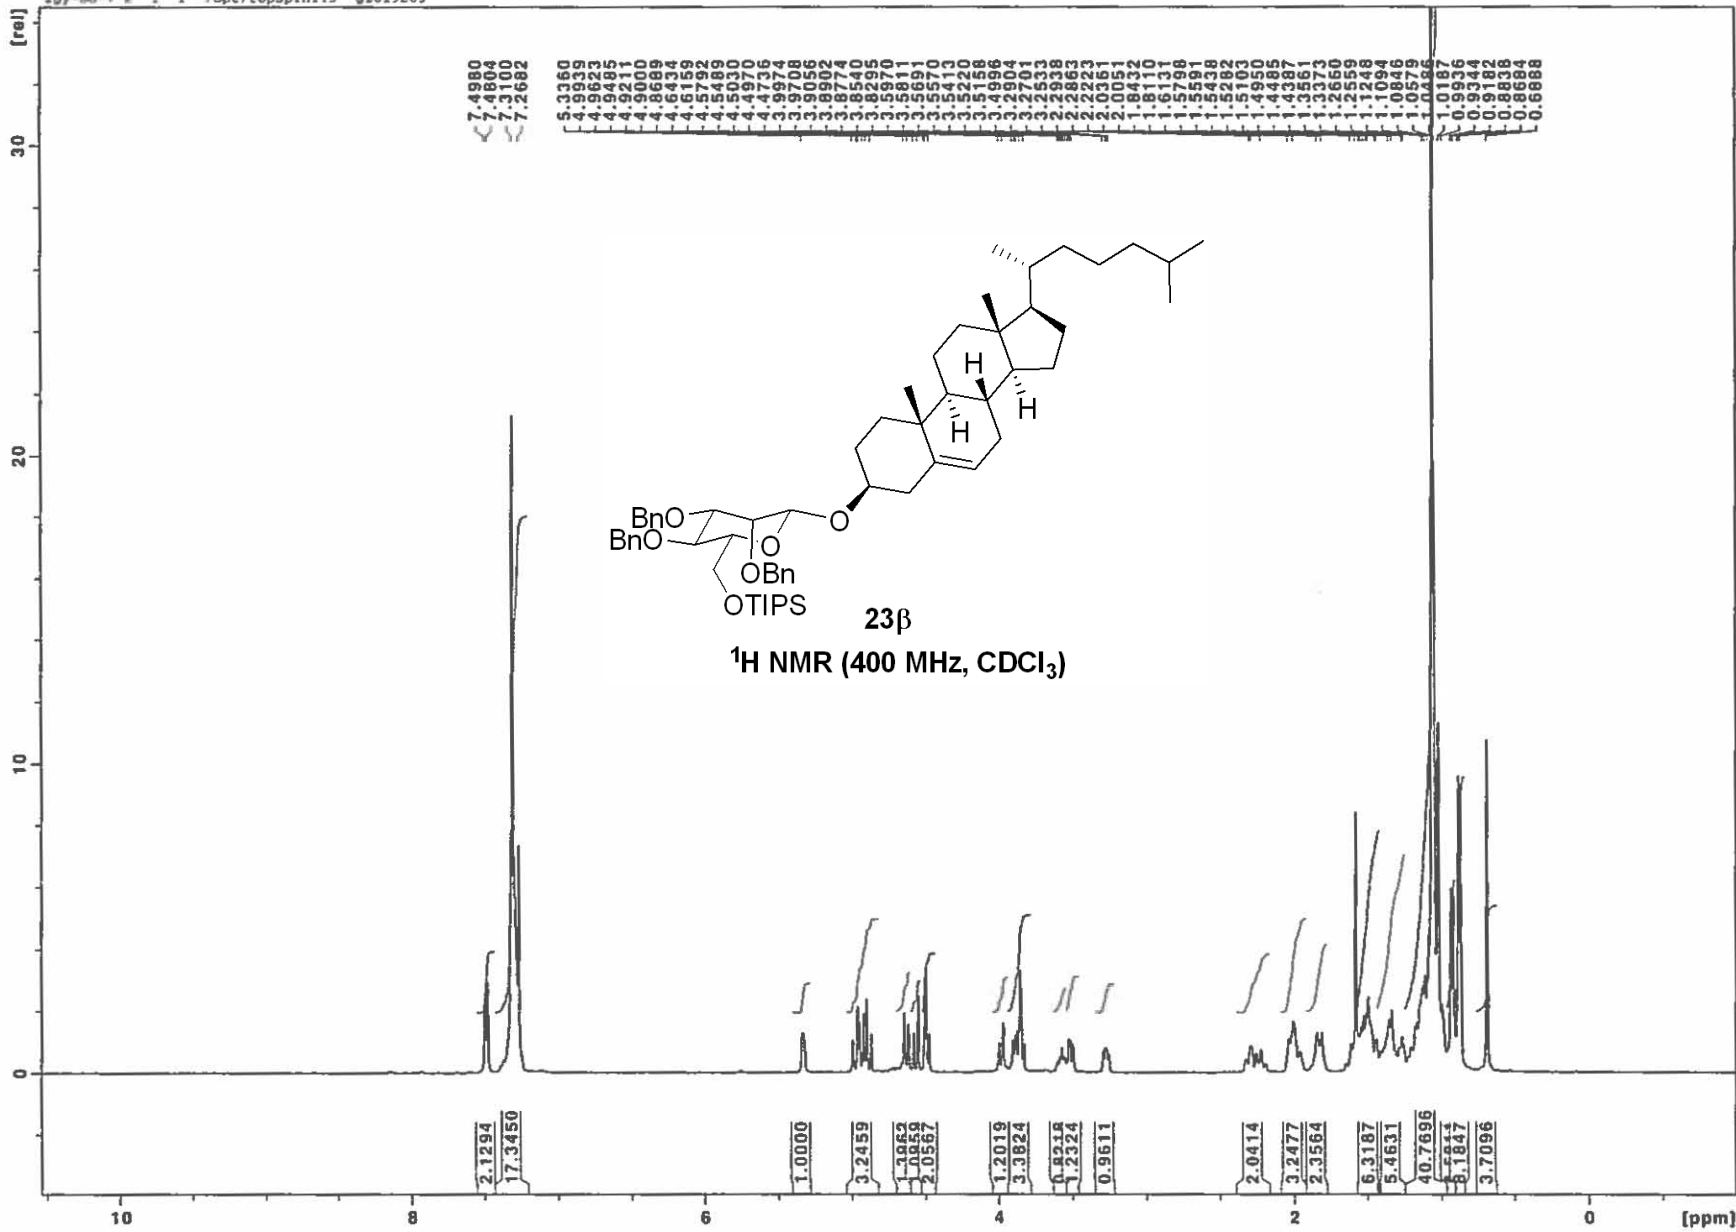

zgy-sgc-7-2-2019new 1 1 J:\gz619263

zgy-sgc-7-2-2019new

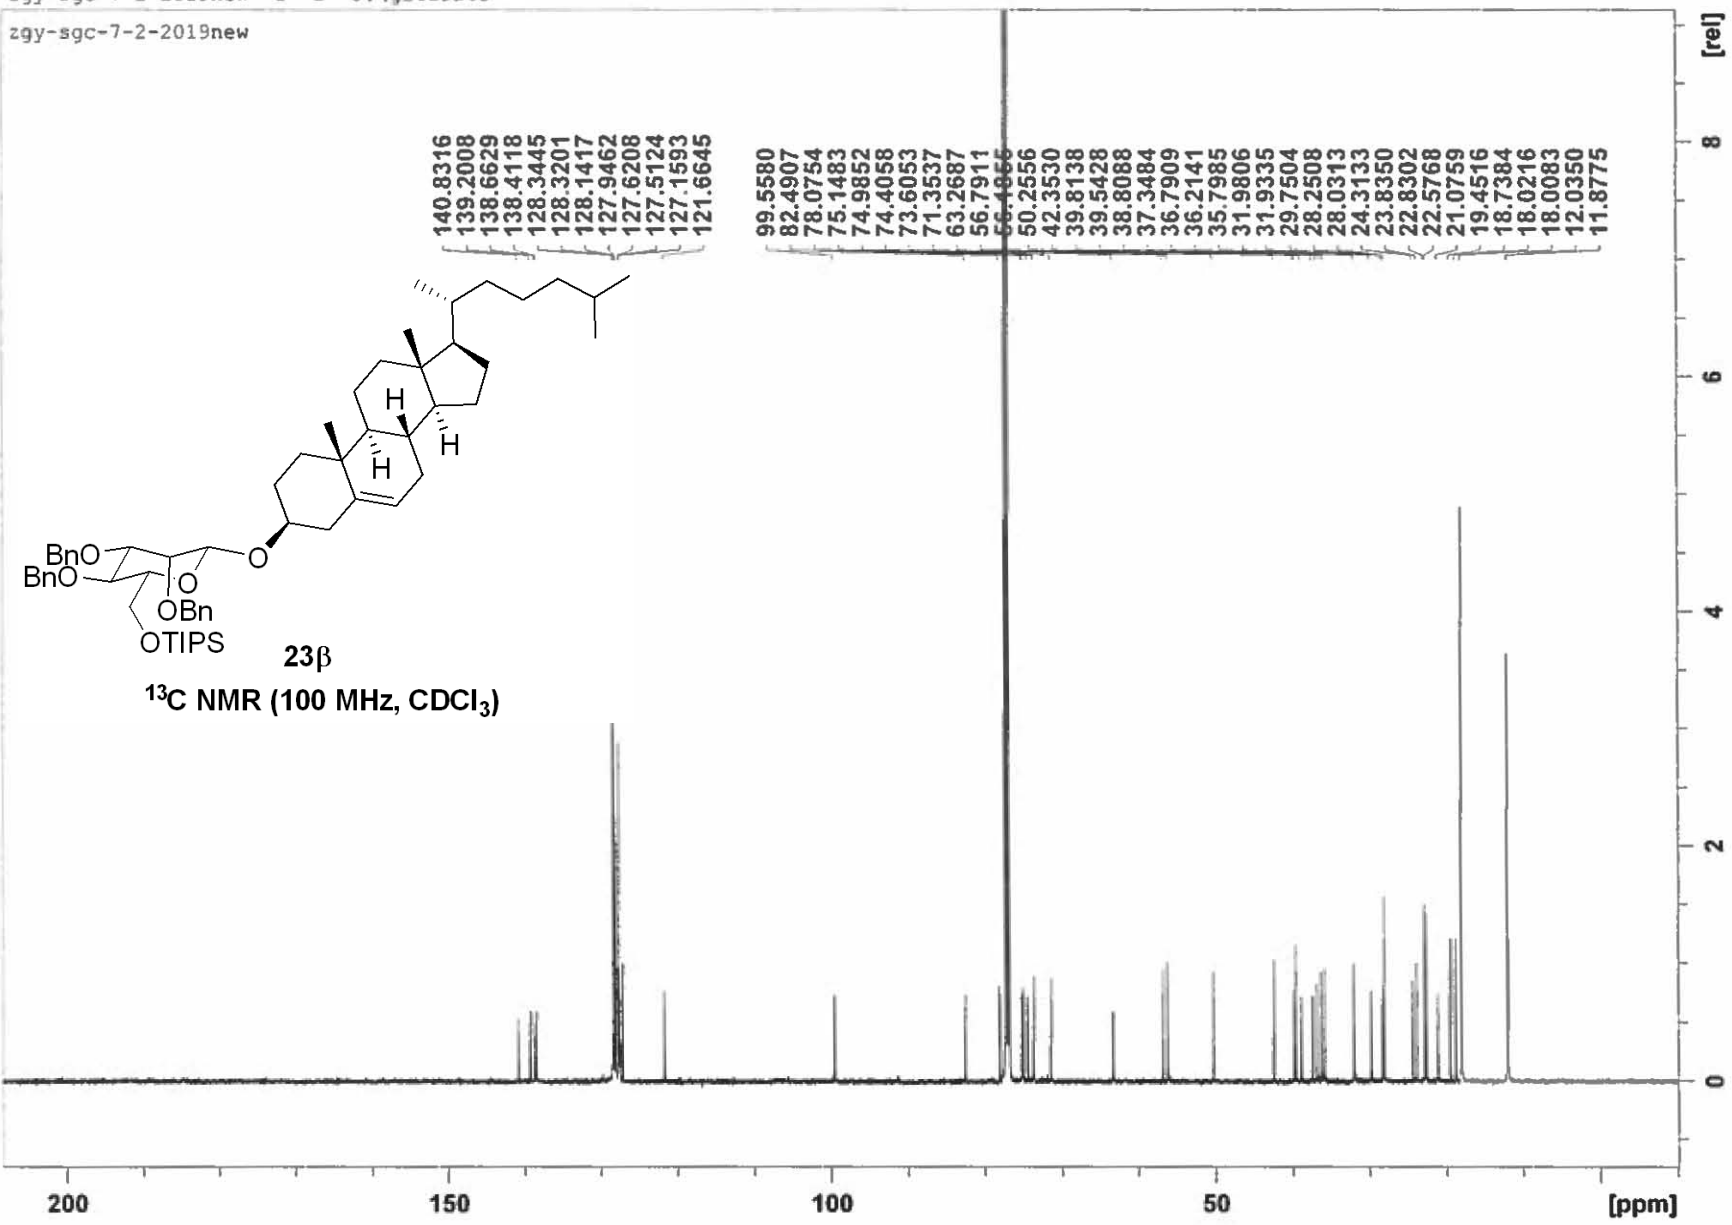

zgy-SG-5 1 1 /opt/topspin1.3 gz619263

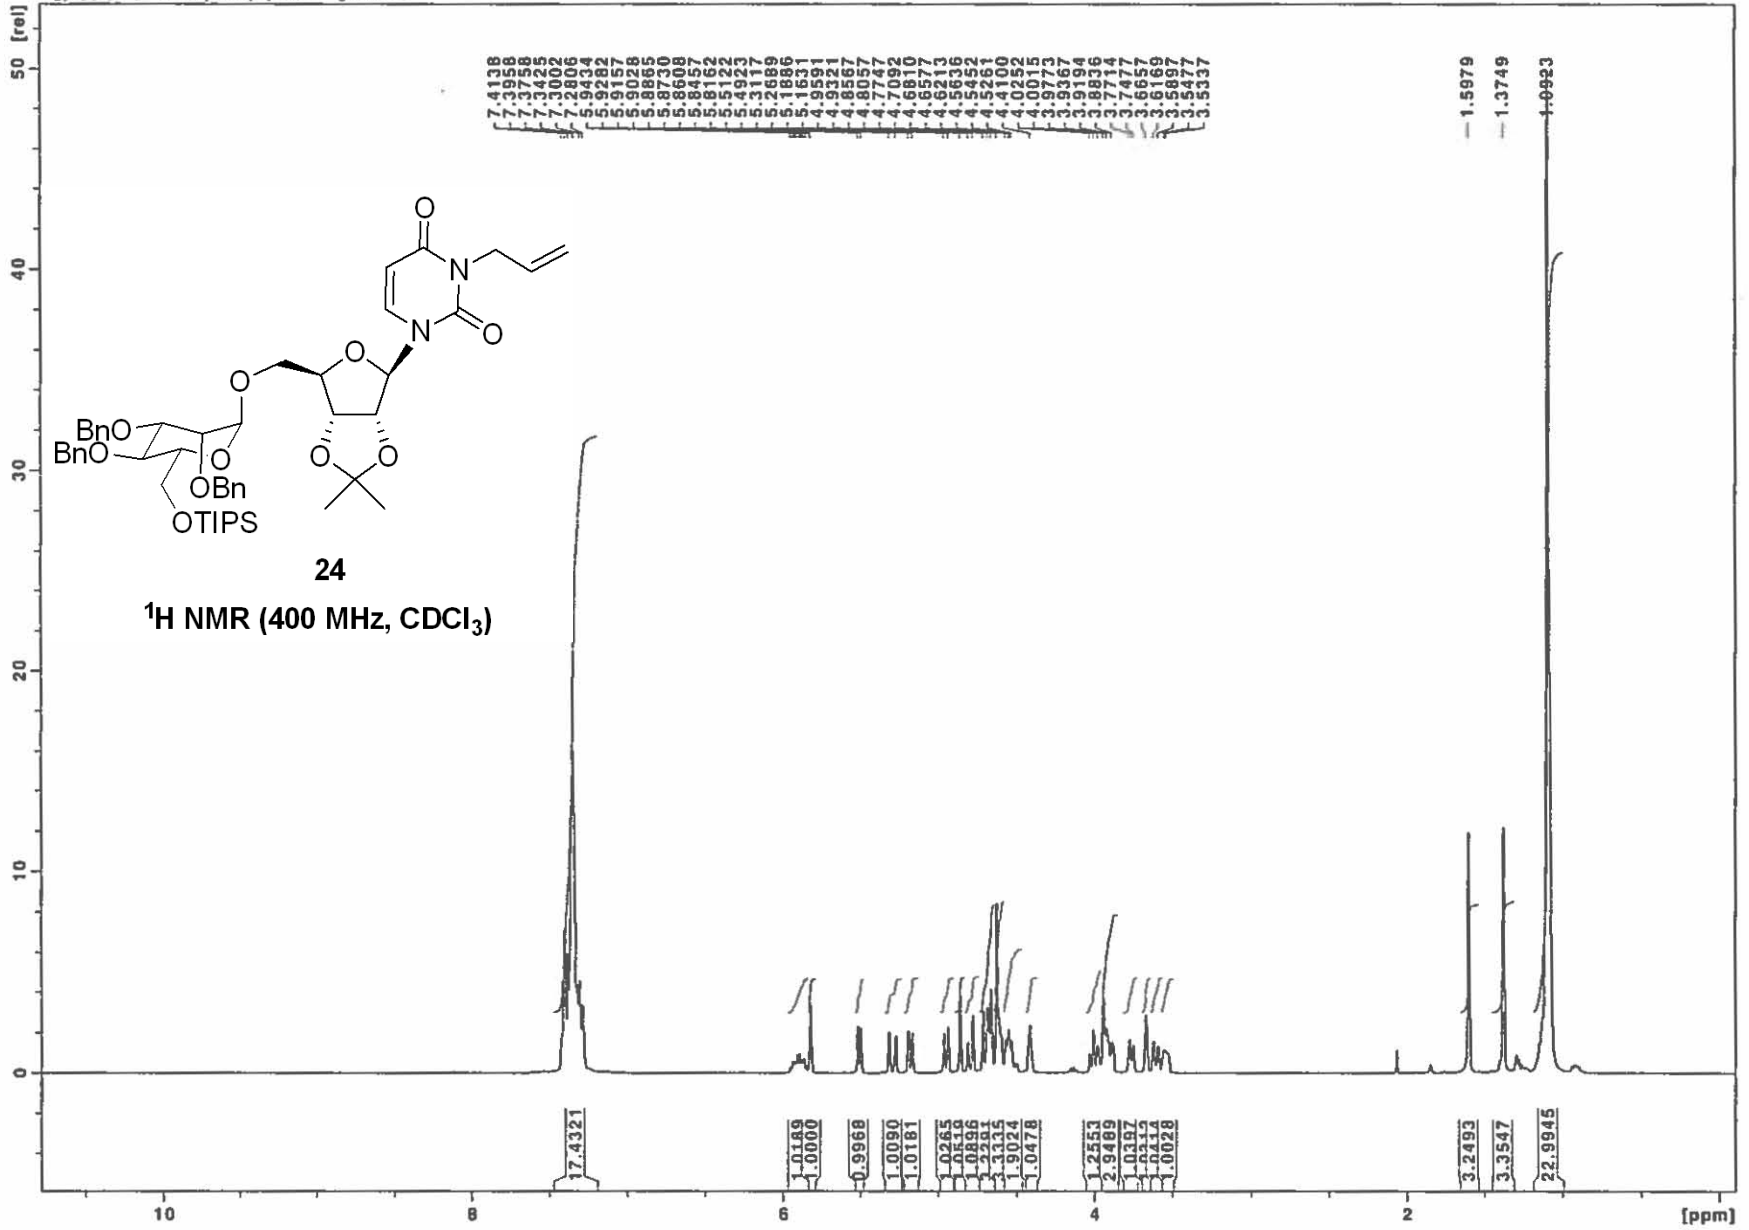

zgy-SGC-5 2 1 /opt/topspin1.3 gz619263

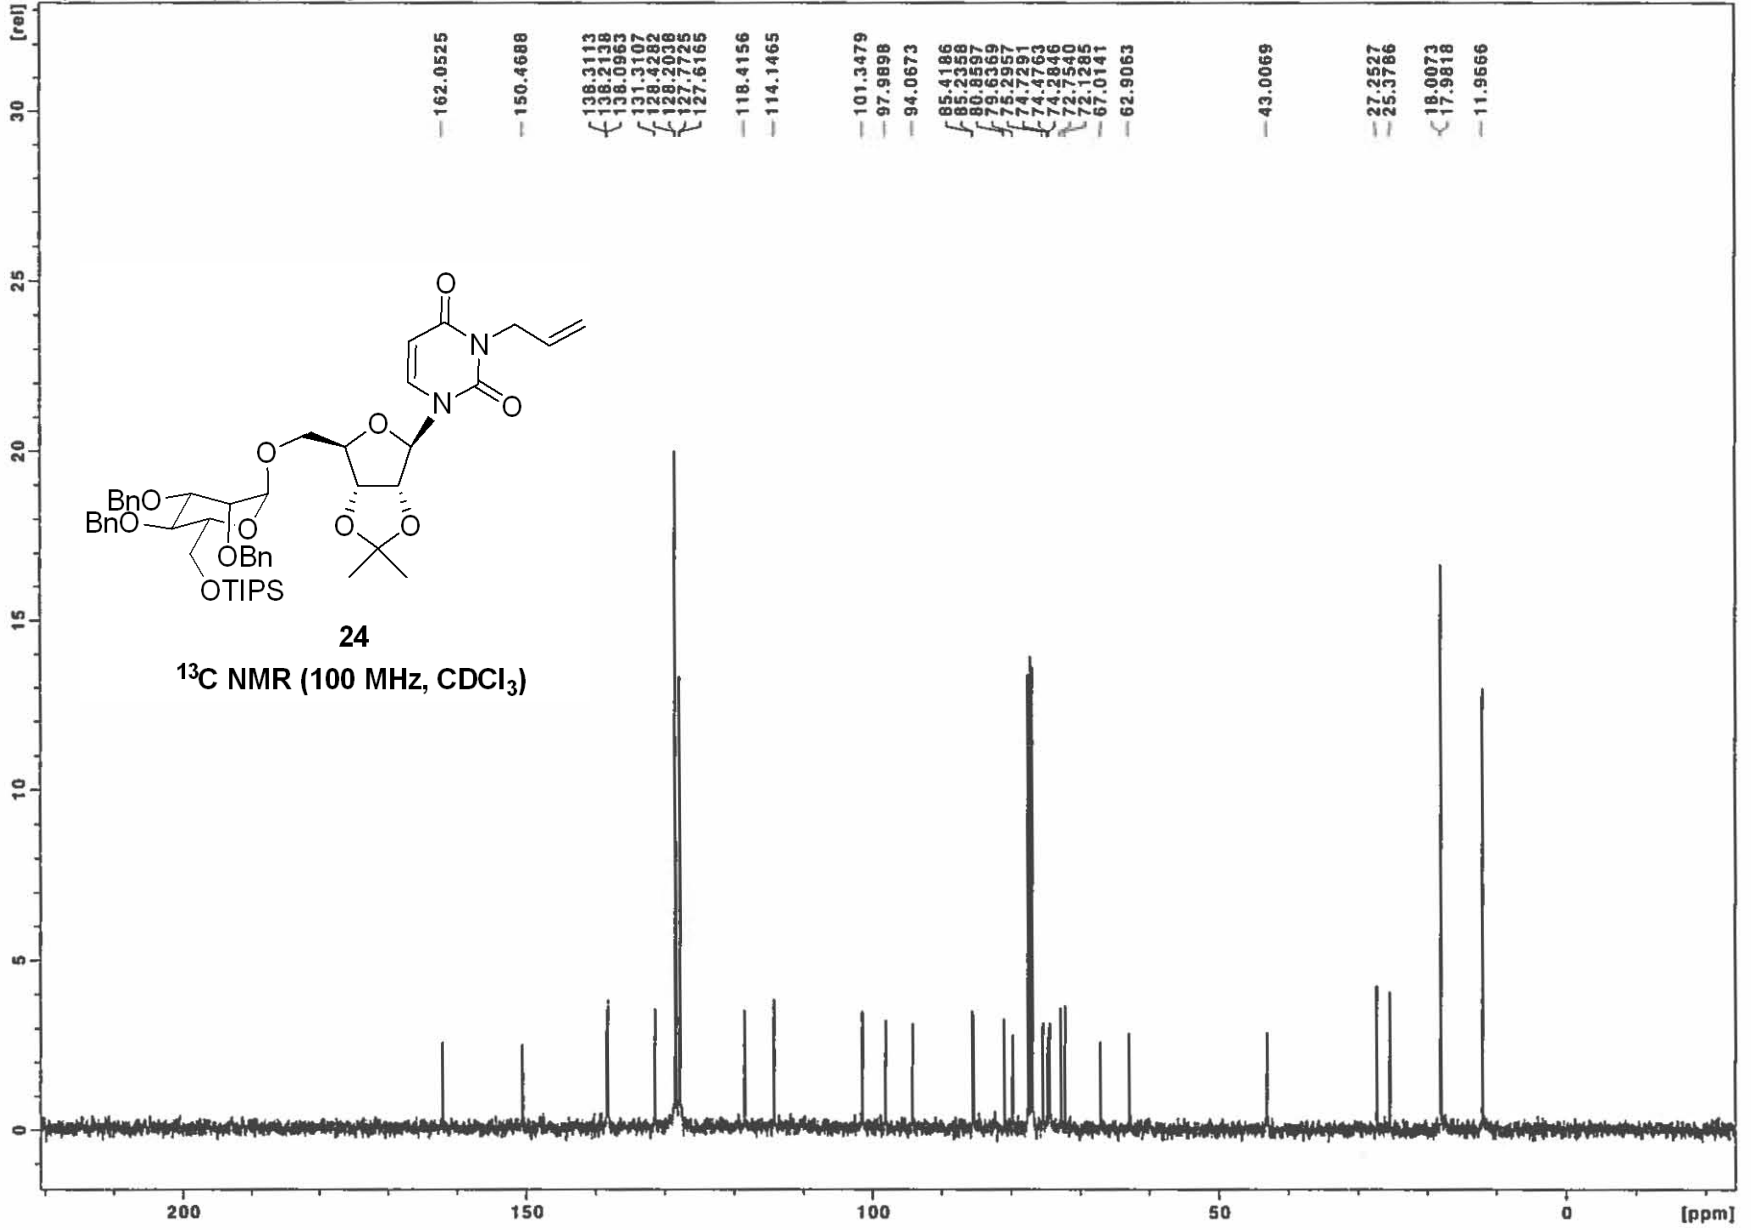

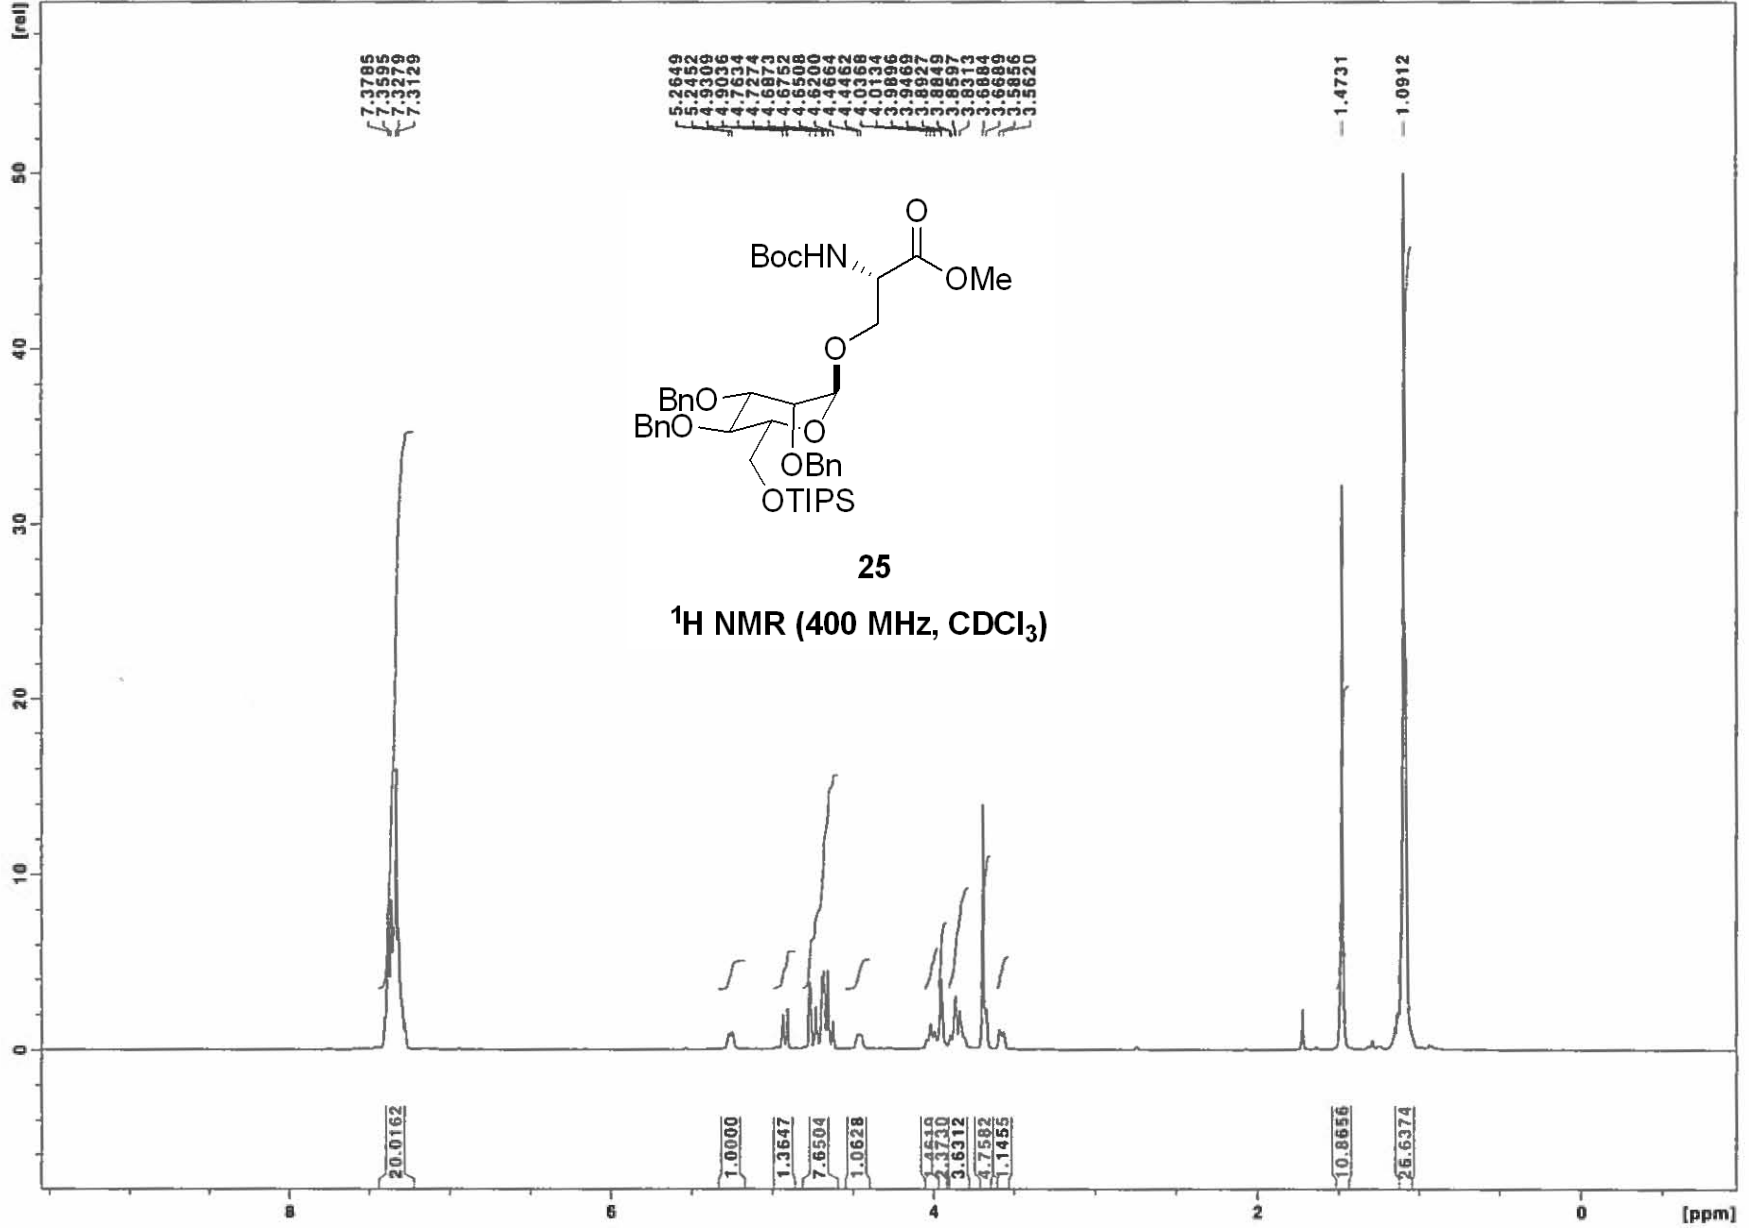

zgy-SGC-11 2 1 /opt/topspini.3 qz619263

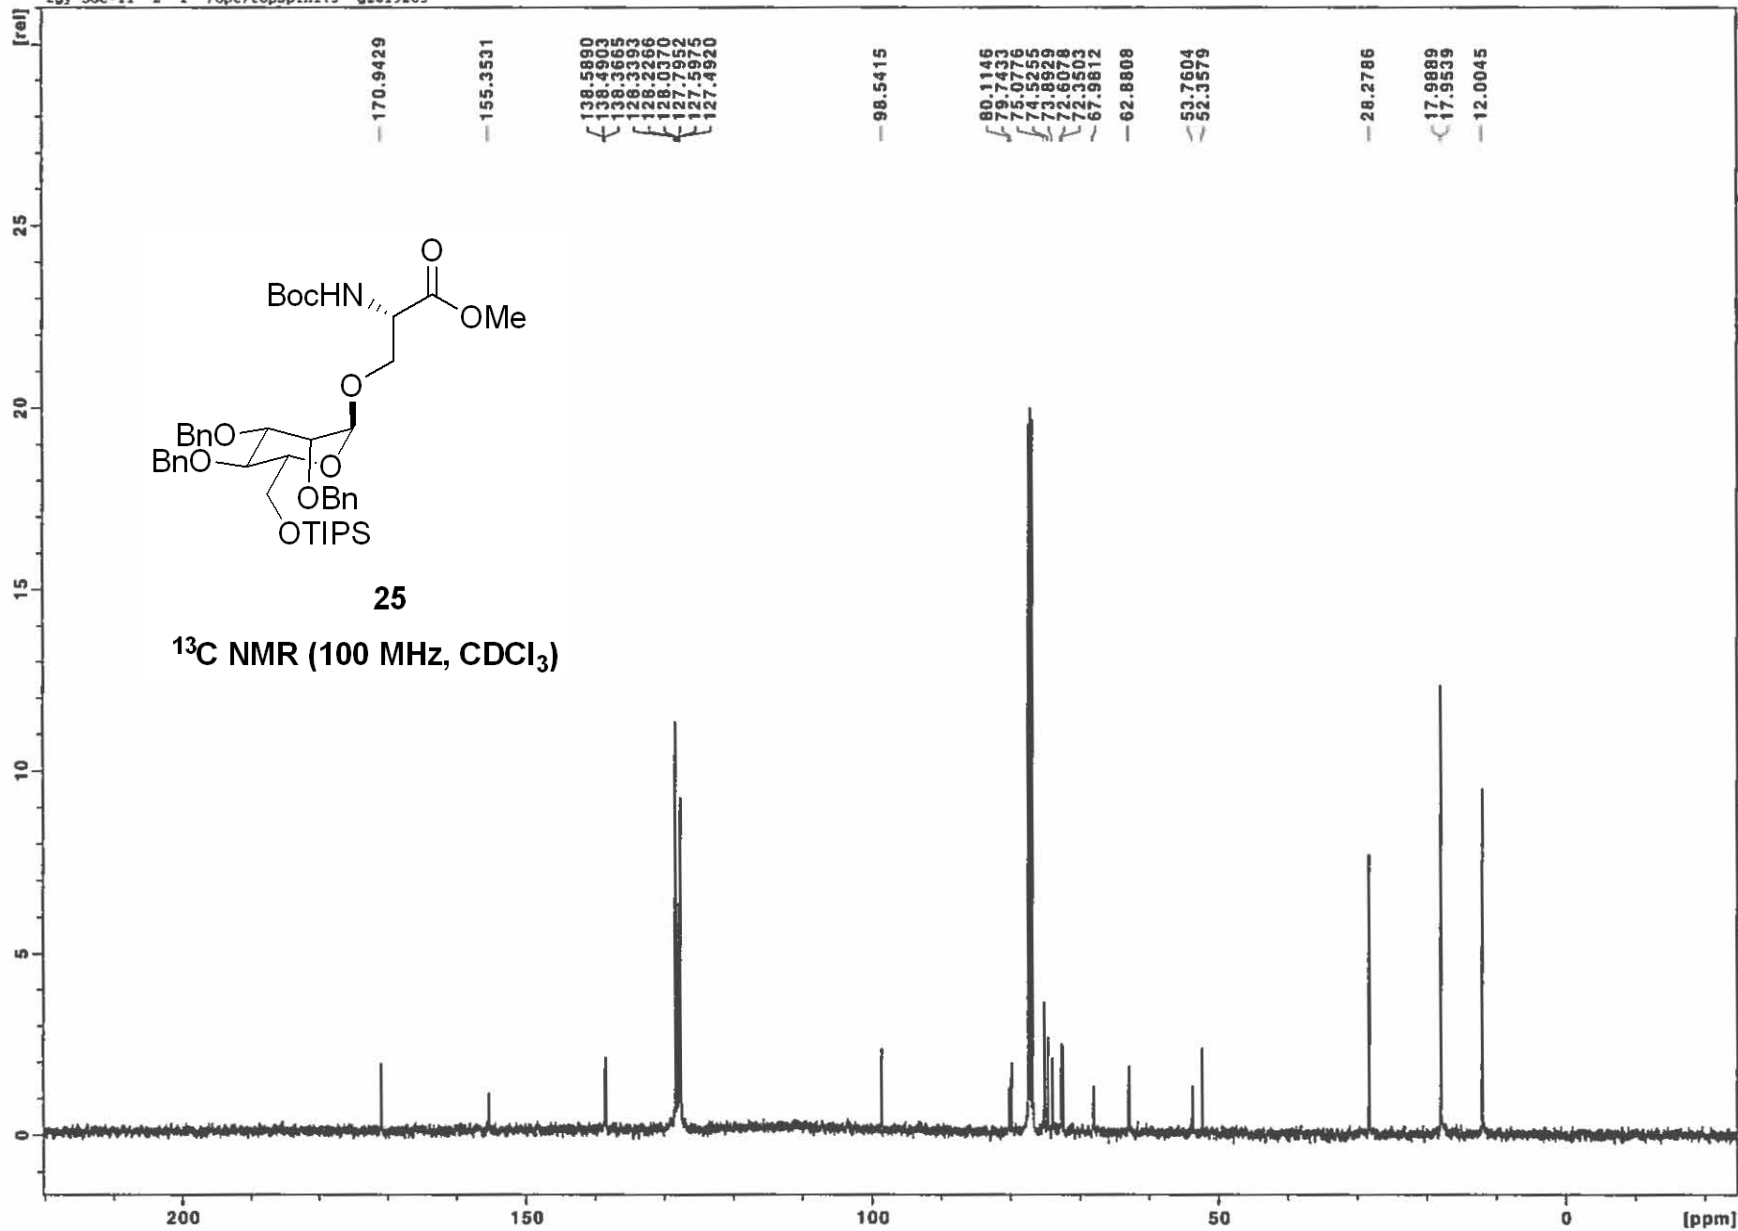

sg-24

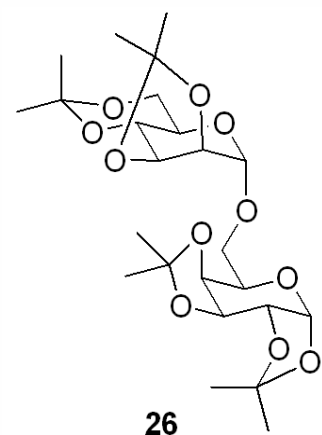

<sup>1</sup>H NMR (500 MHz, CDCl<sub>3</sub>)

4.6538  
4.6420  
4.6349  
4.6301  
4.6191  
4.6142  
4.4222  
4.4135  
4.4098  
4.4062  
4.4011  
4.3975  
4.3938  
4.3851  
4.3405  
4.3356  
4.3304  
4.3255  
4.2396  
4.2358  
4.2238  
4.2199  
4.1280  
4.1155  
4.1106  
4.0981  
4.0713  
4.0626  
4.0538  
4.0452  
3.9991  
3.9920  
3.9828  
3.9758  
3.9725  
3.9688  
3.9591  
3.9554  
3.7746  
3.7612  
3.7536  
3.7403  
3.6758  
3.6622  
3.6548  
3.6412  
1.5544  
1.4781  
1.4606  
1.4580  
1.3916  
1.3573  
1.3441  
1.3371

1.0000  
1.0015  
1.0450  
1.0444  
1.0444  
1.0407  
1.0699  
1.0440  
1.0268

3.4034

10 8 6 4 2 0 [ppm]

40 [rel]

30

20

10

0

sgc-24

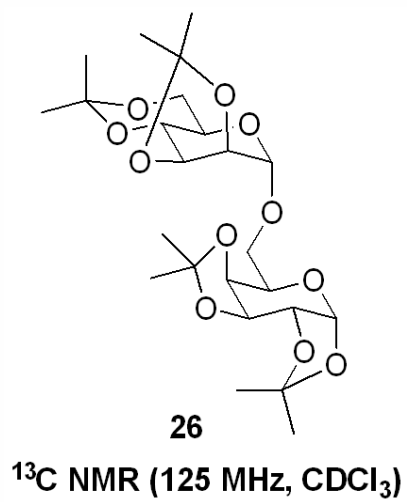

112.5414  
109.3469  
109.2184  
108.5609  
106.6826

96.2892

85.0408  
80.3648  
79.5122  
73.0375  
70.9264  
70.6211  
70.5006  
66.9177  
66.0504

26.8633  
26.0432  
25.9409  
25.8869  
25.2269  
24.8722  
24.5686  
24.4797

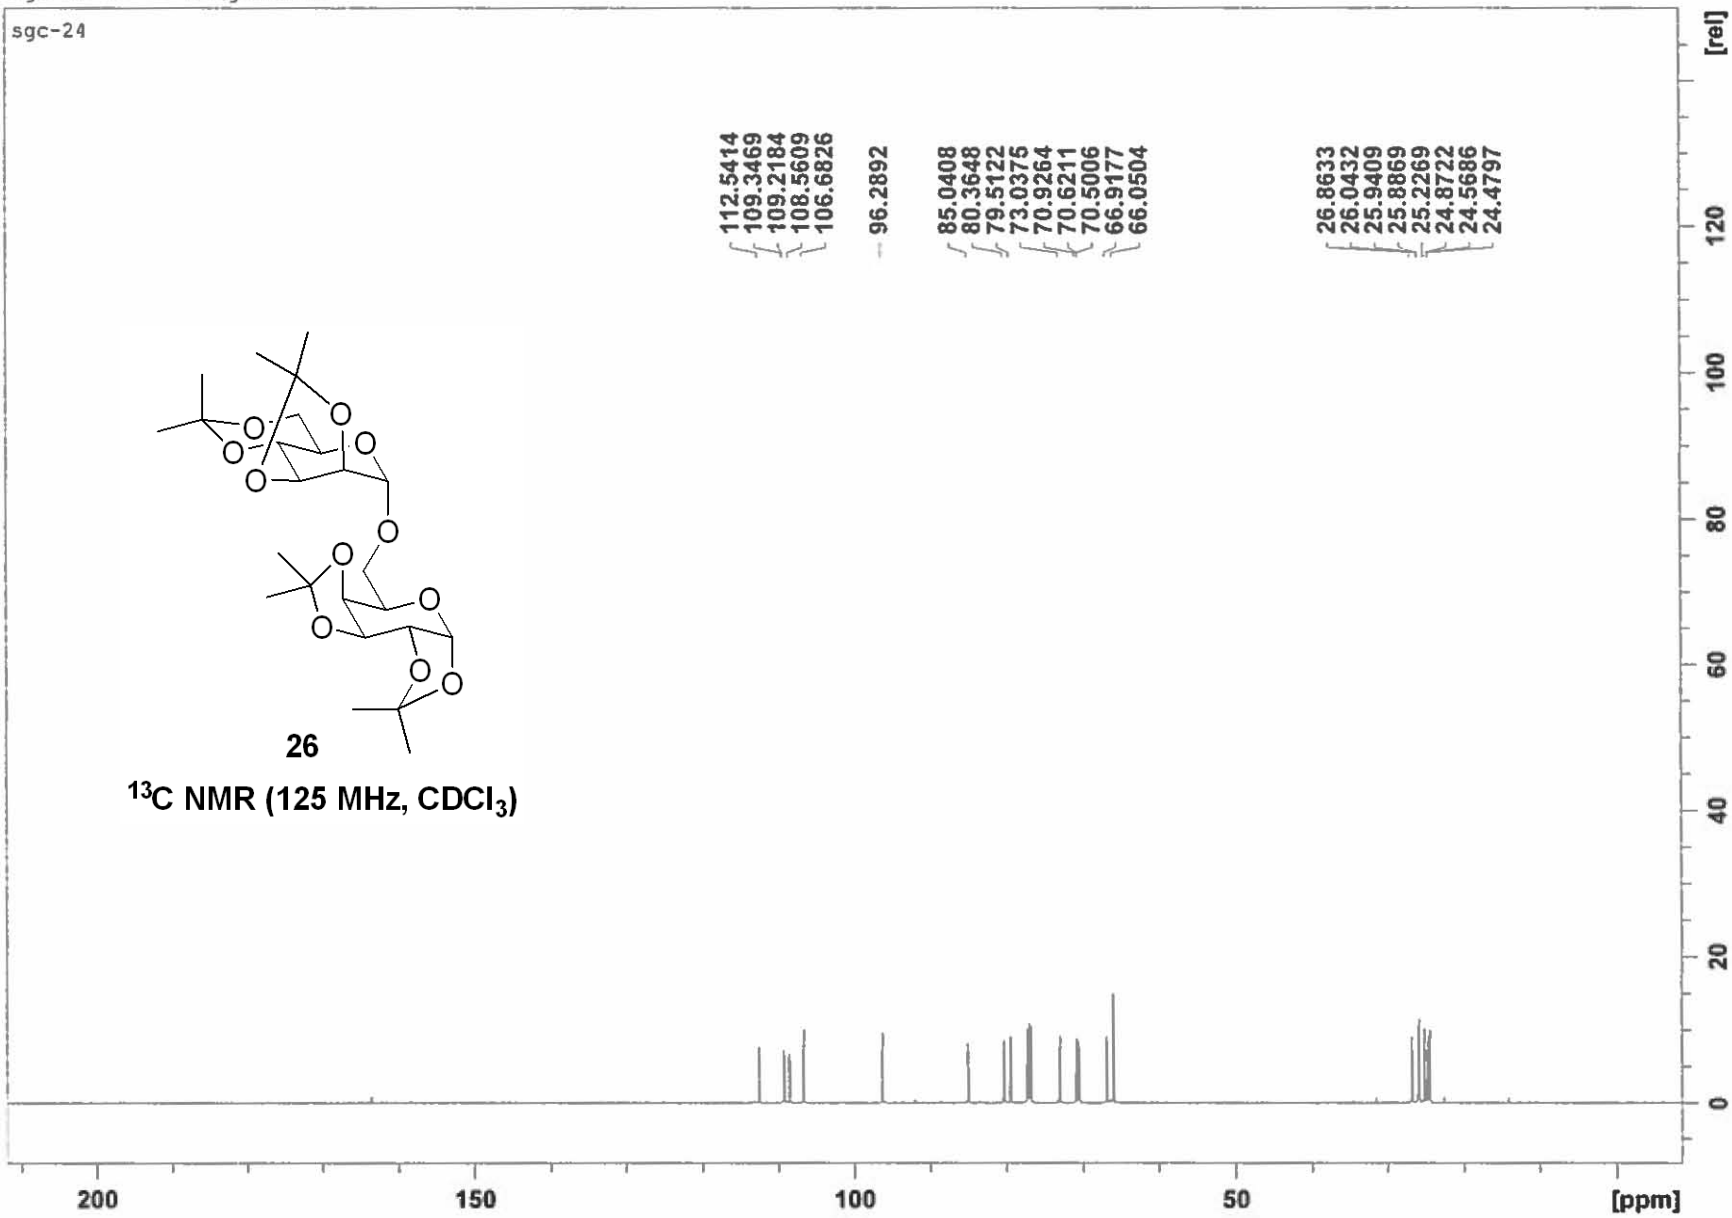



zgy-80-2-1 1 1 /opt/topspin1.3 gz619263

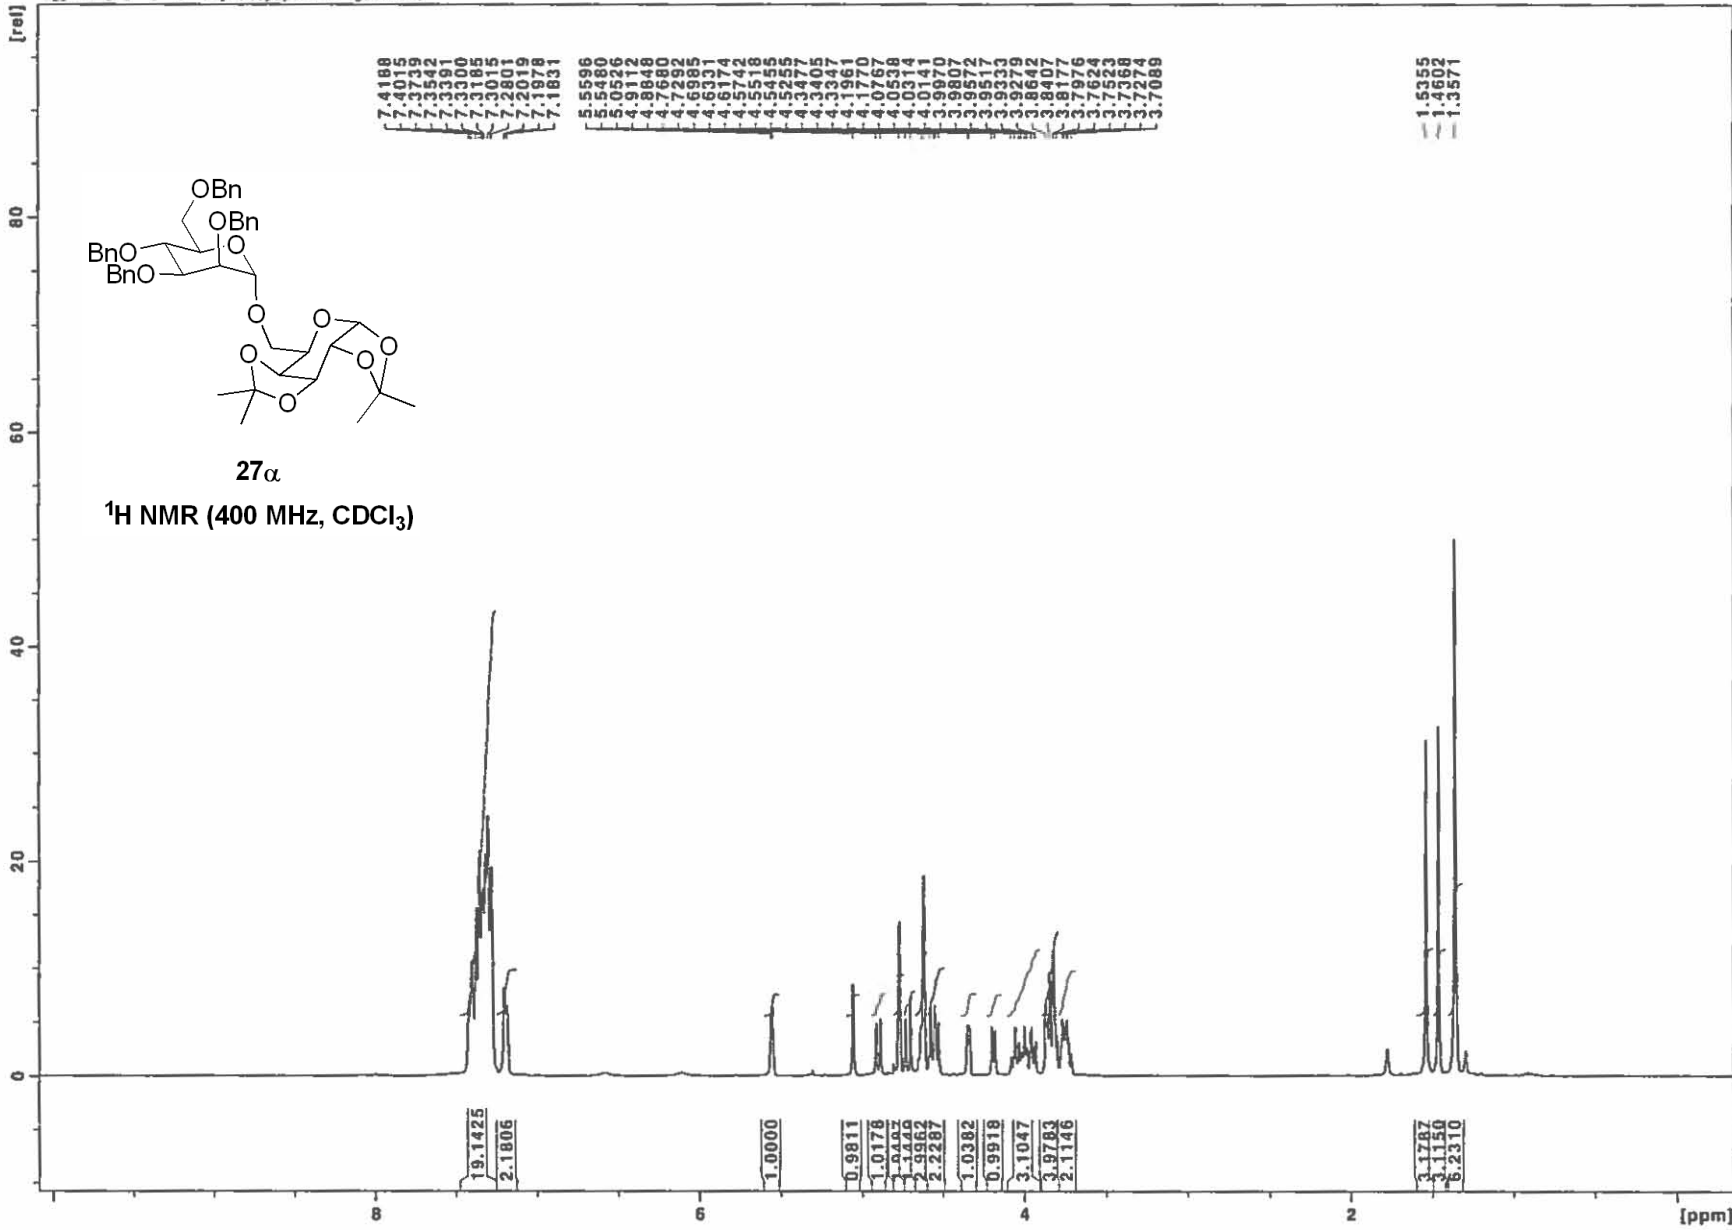

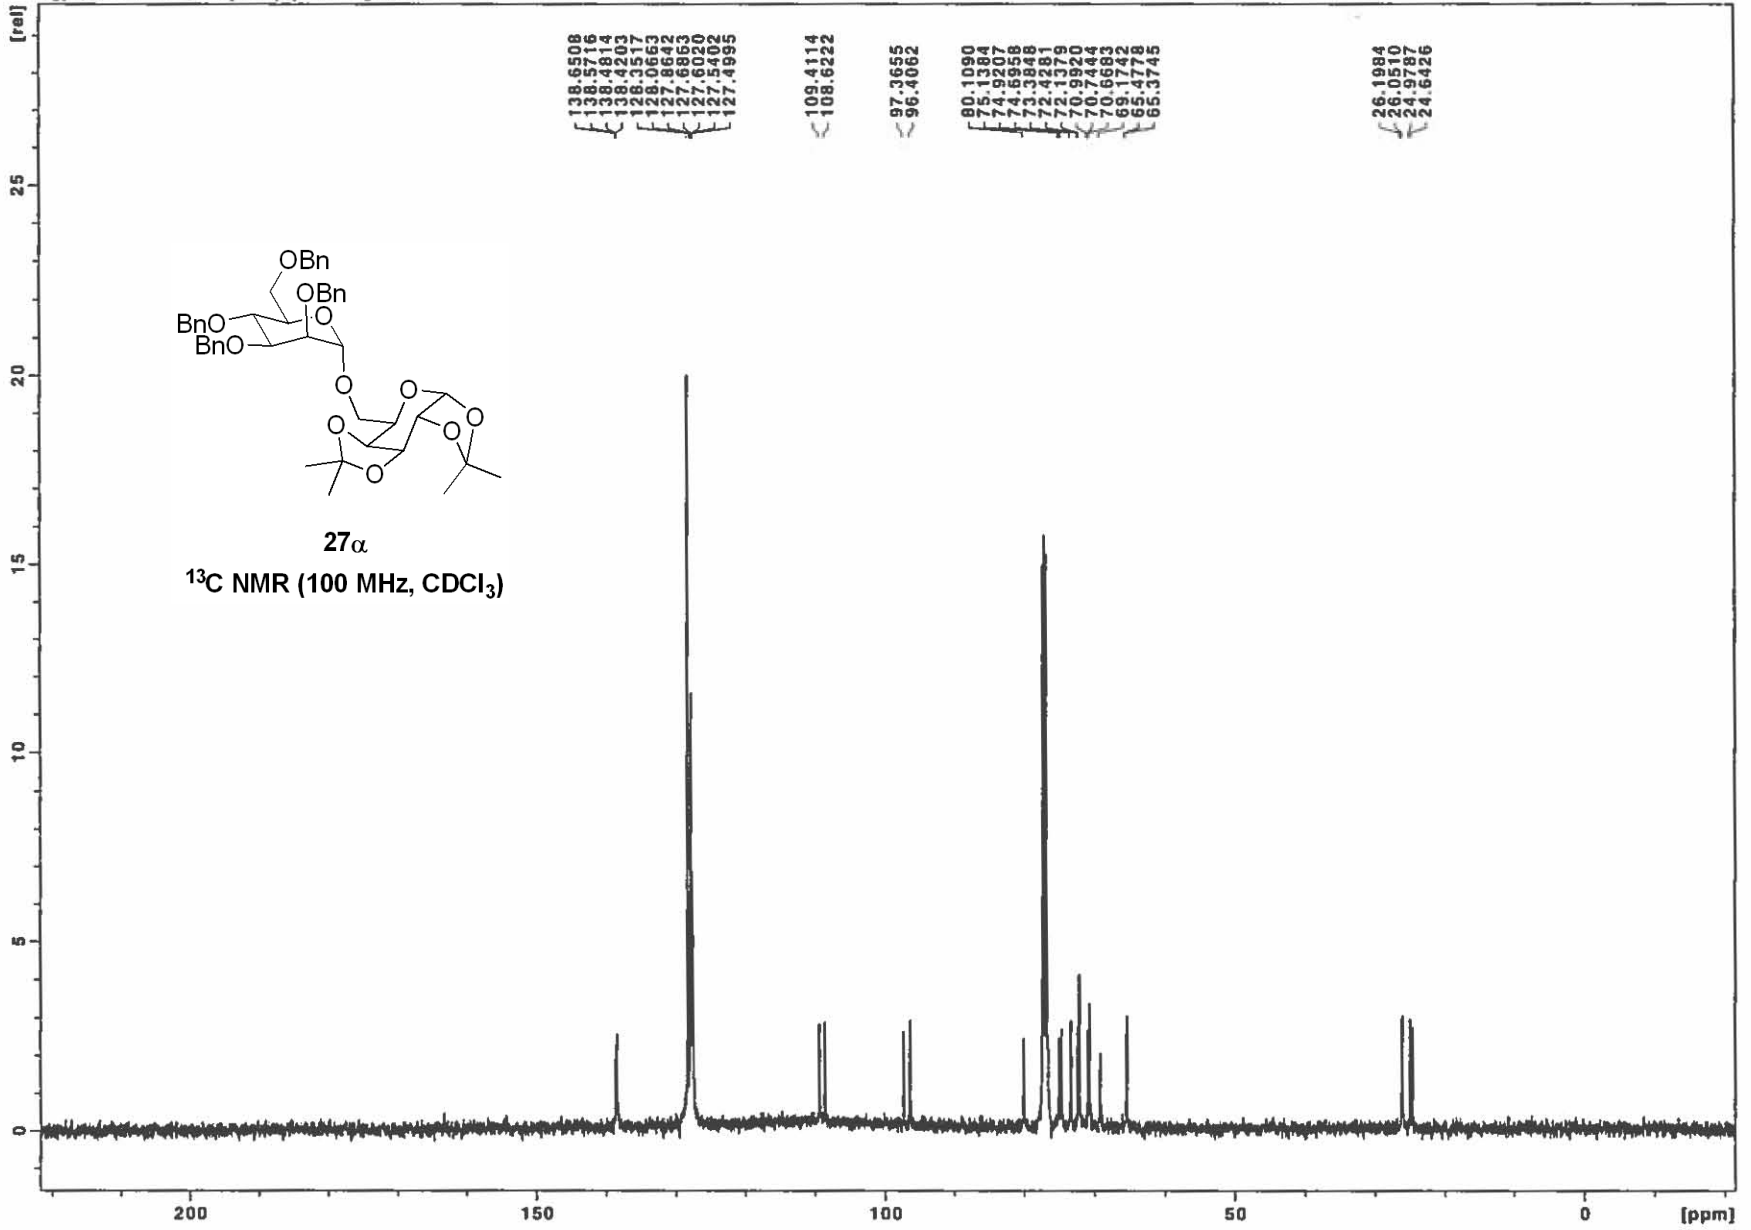

zgy-SG-2-2 1 1 /opt/topspin1.3 gz619263

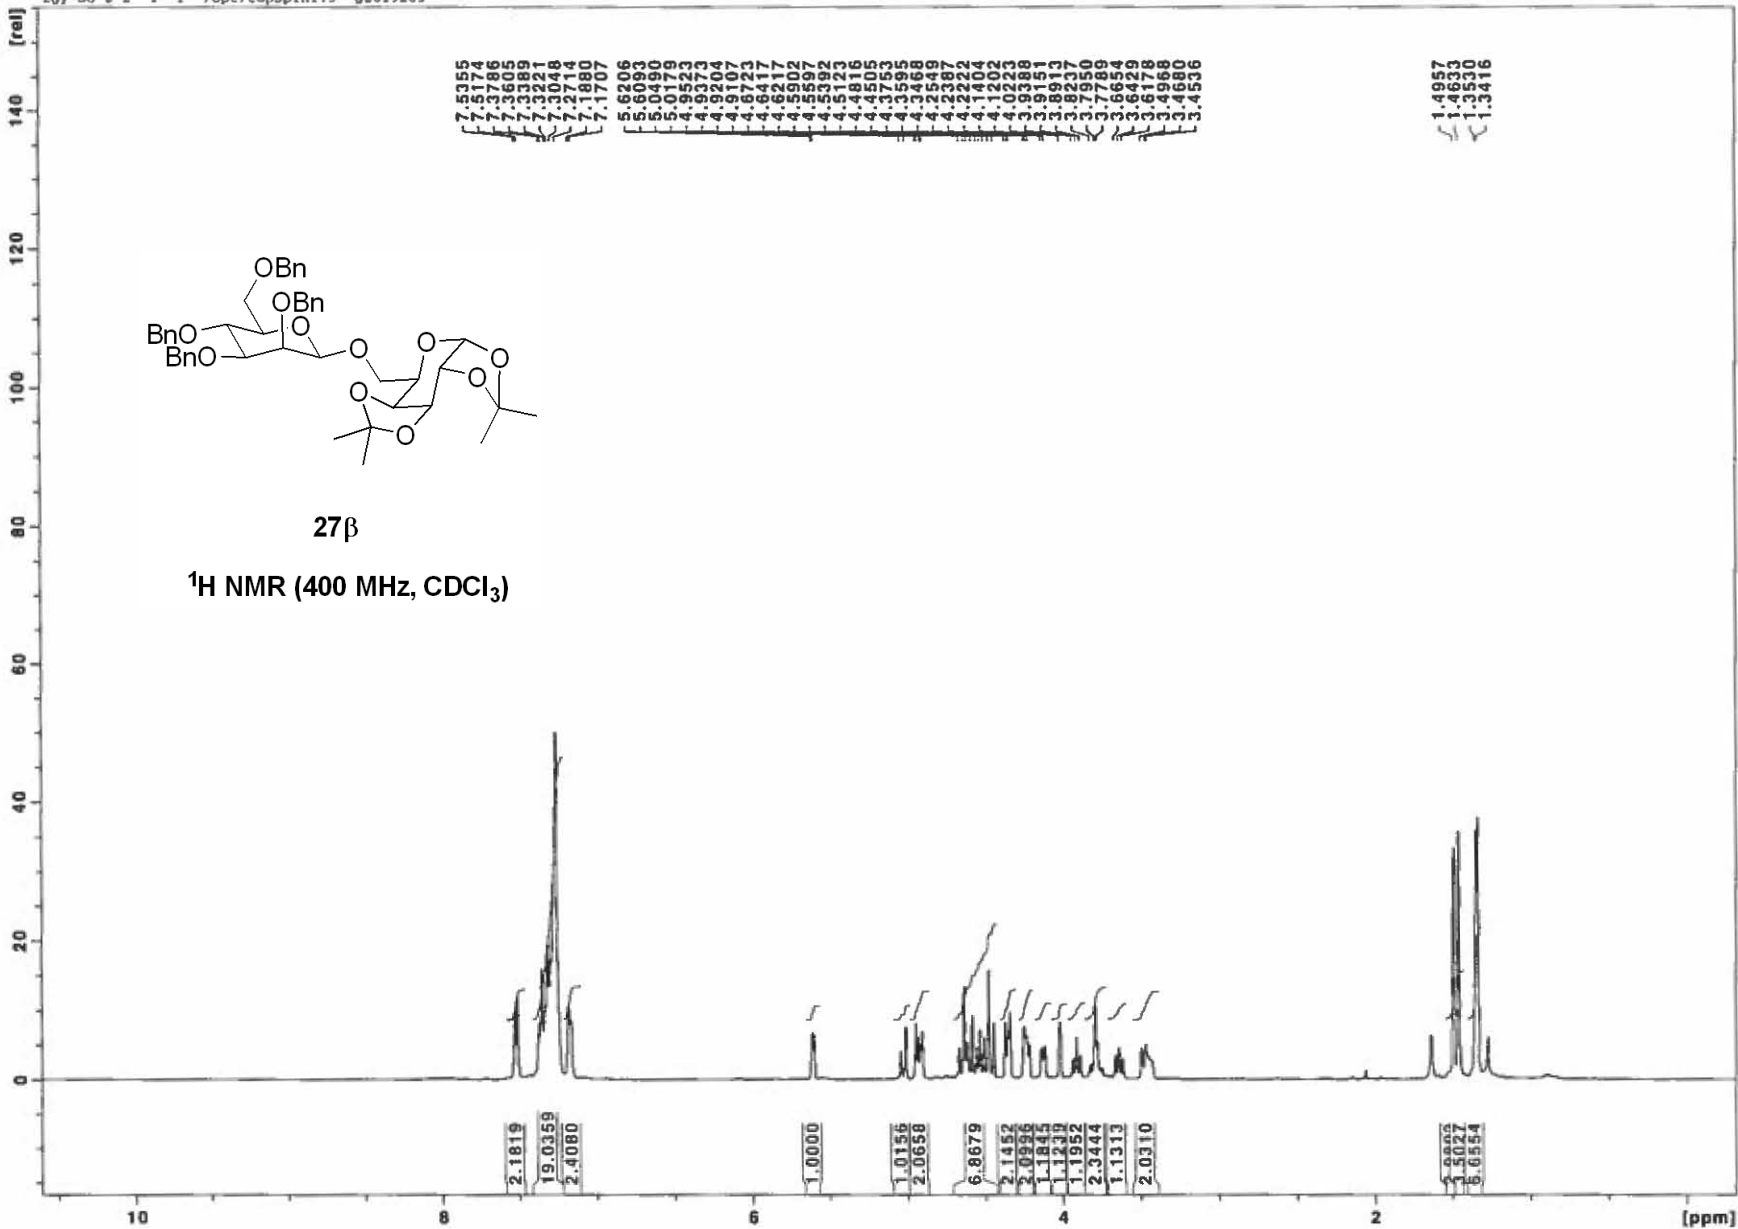

zgy-SQC-2-2 2 1 /opt/topspin1.3 gz619263

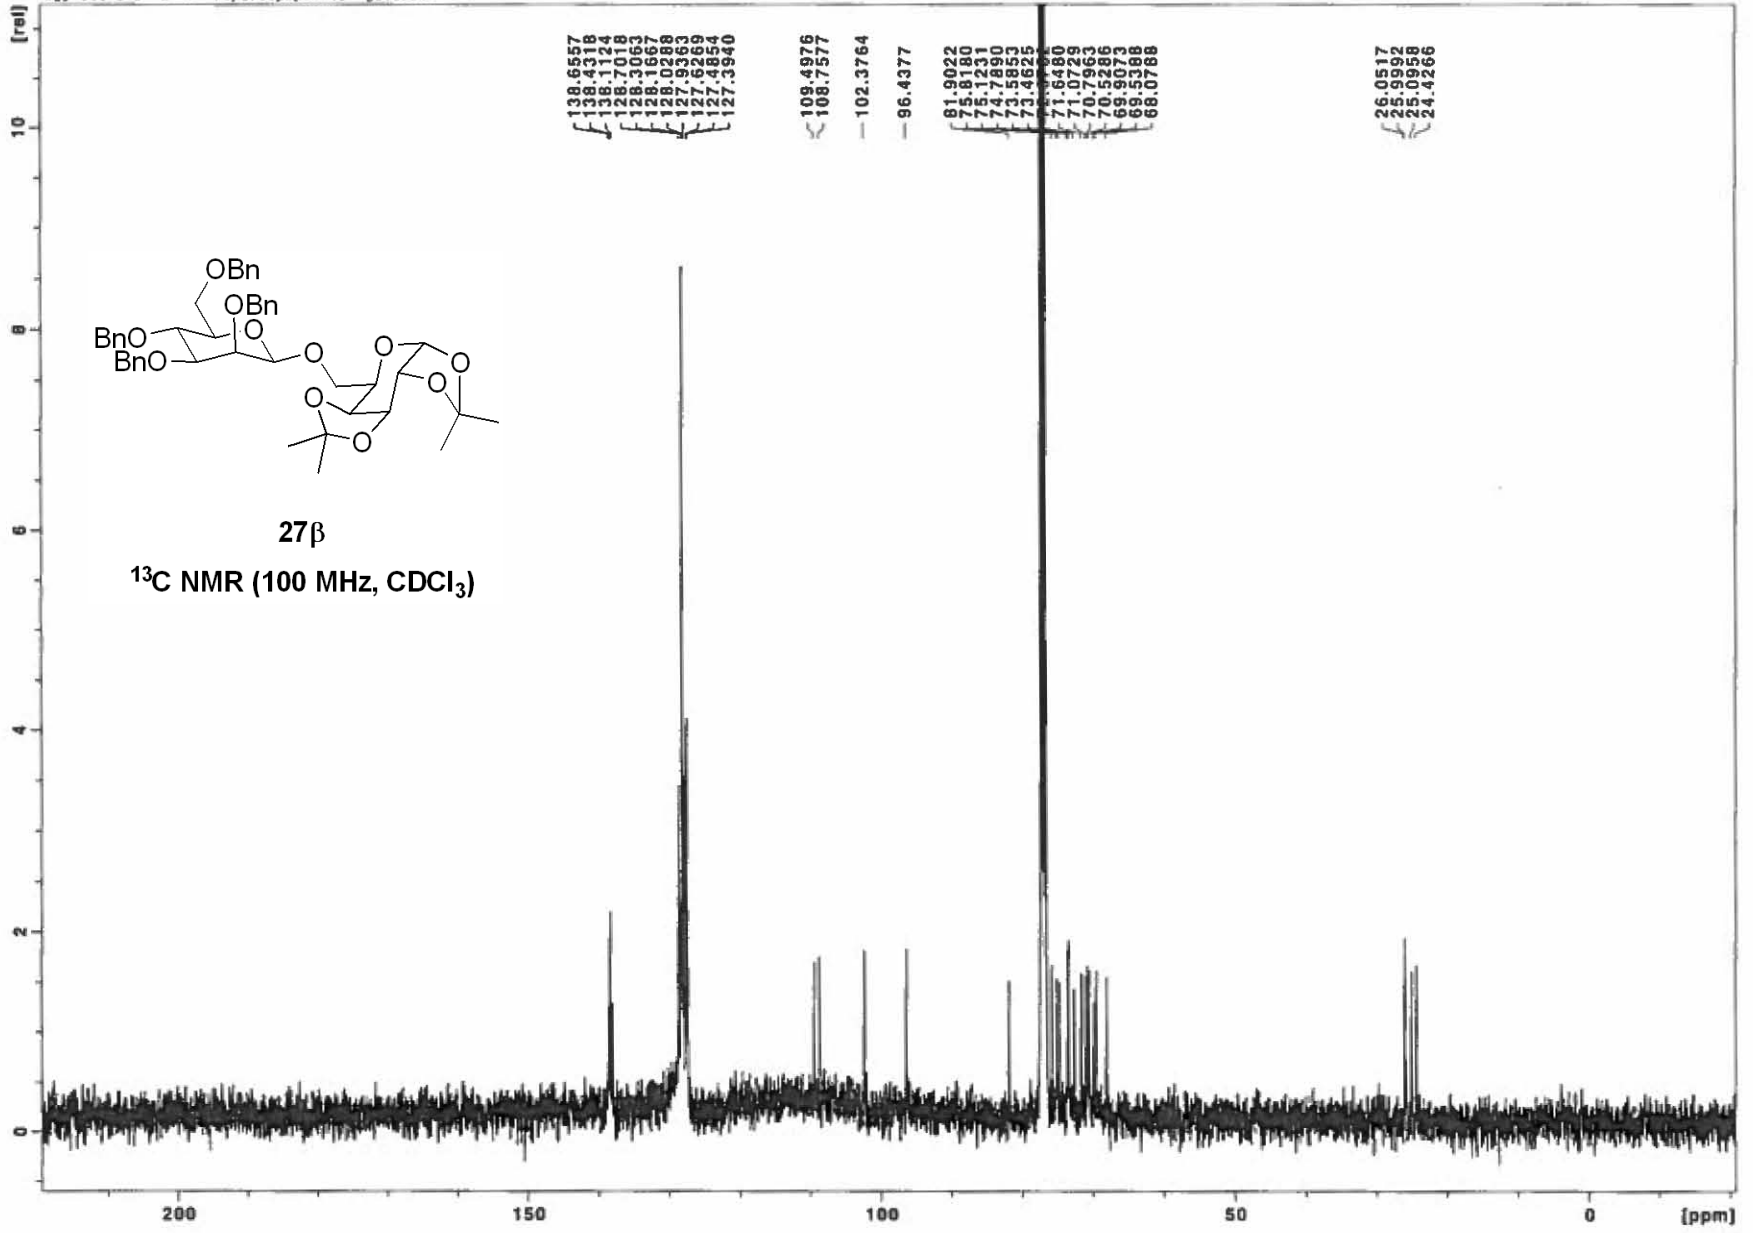

zgy-SG-3-2 1 1 /opt/topspin1.3 gz619263

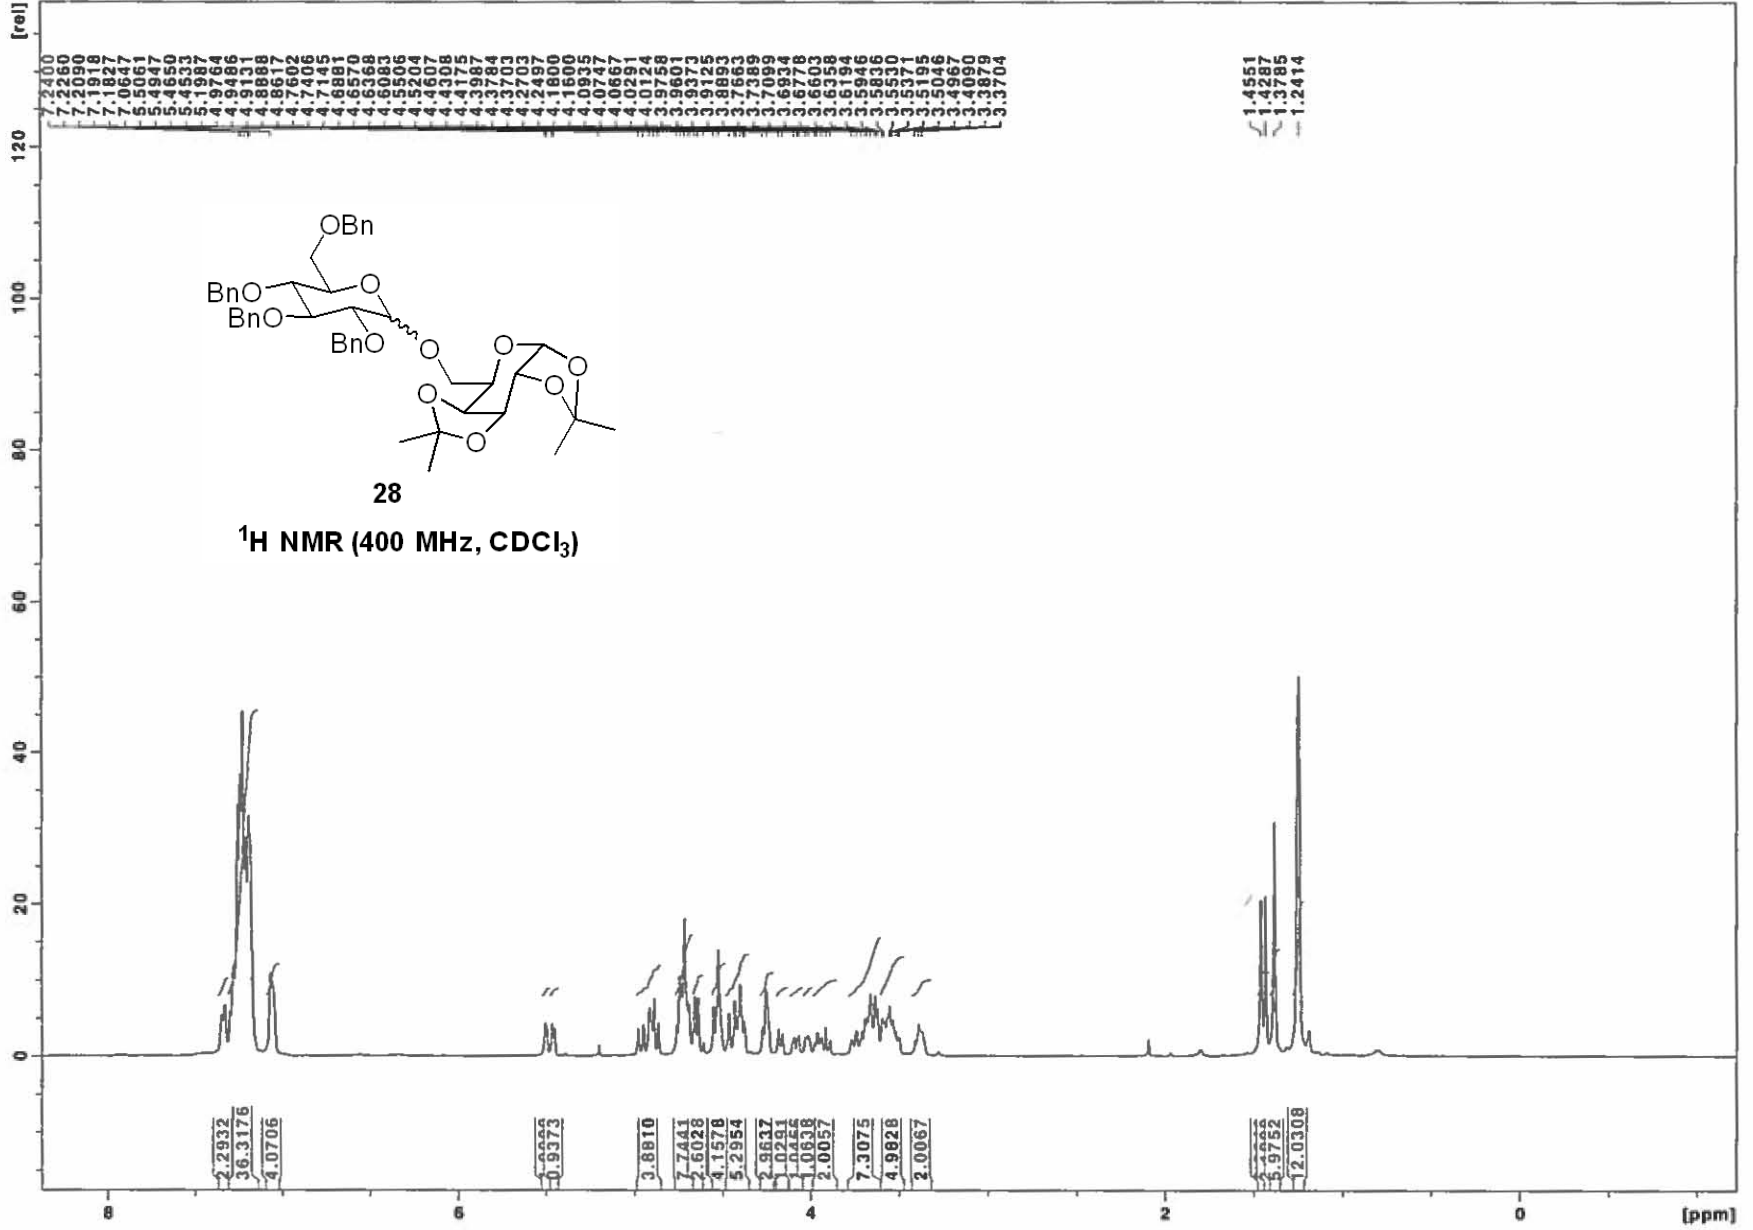

zgy-SGC-3-1 2 1 /opt/topspin1.3 gz619263

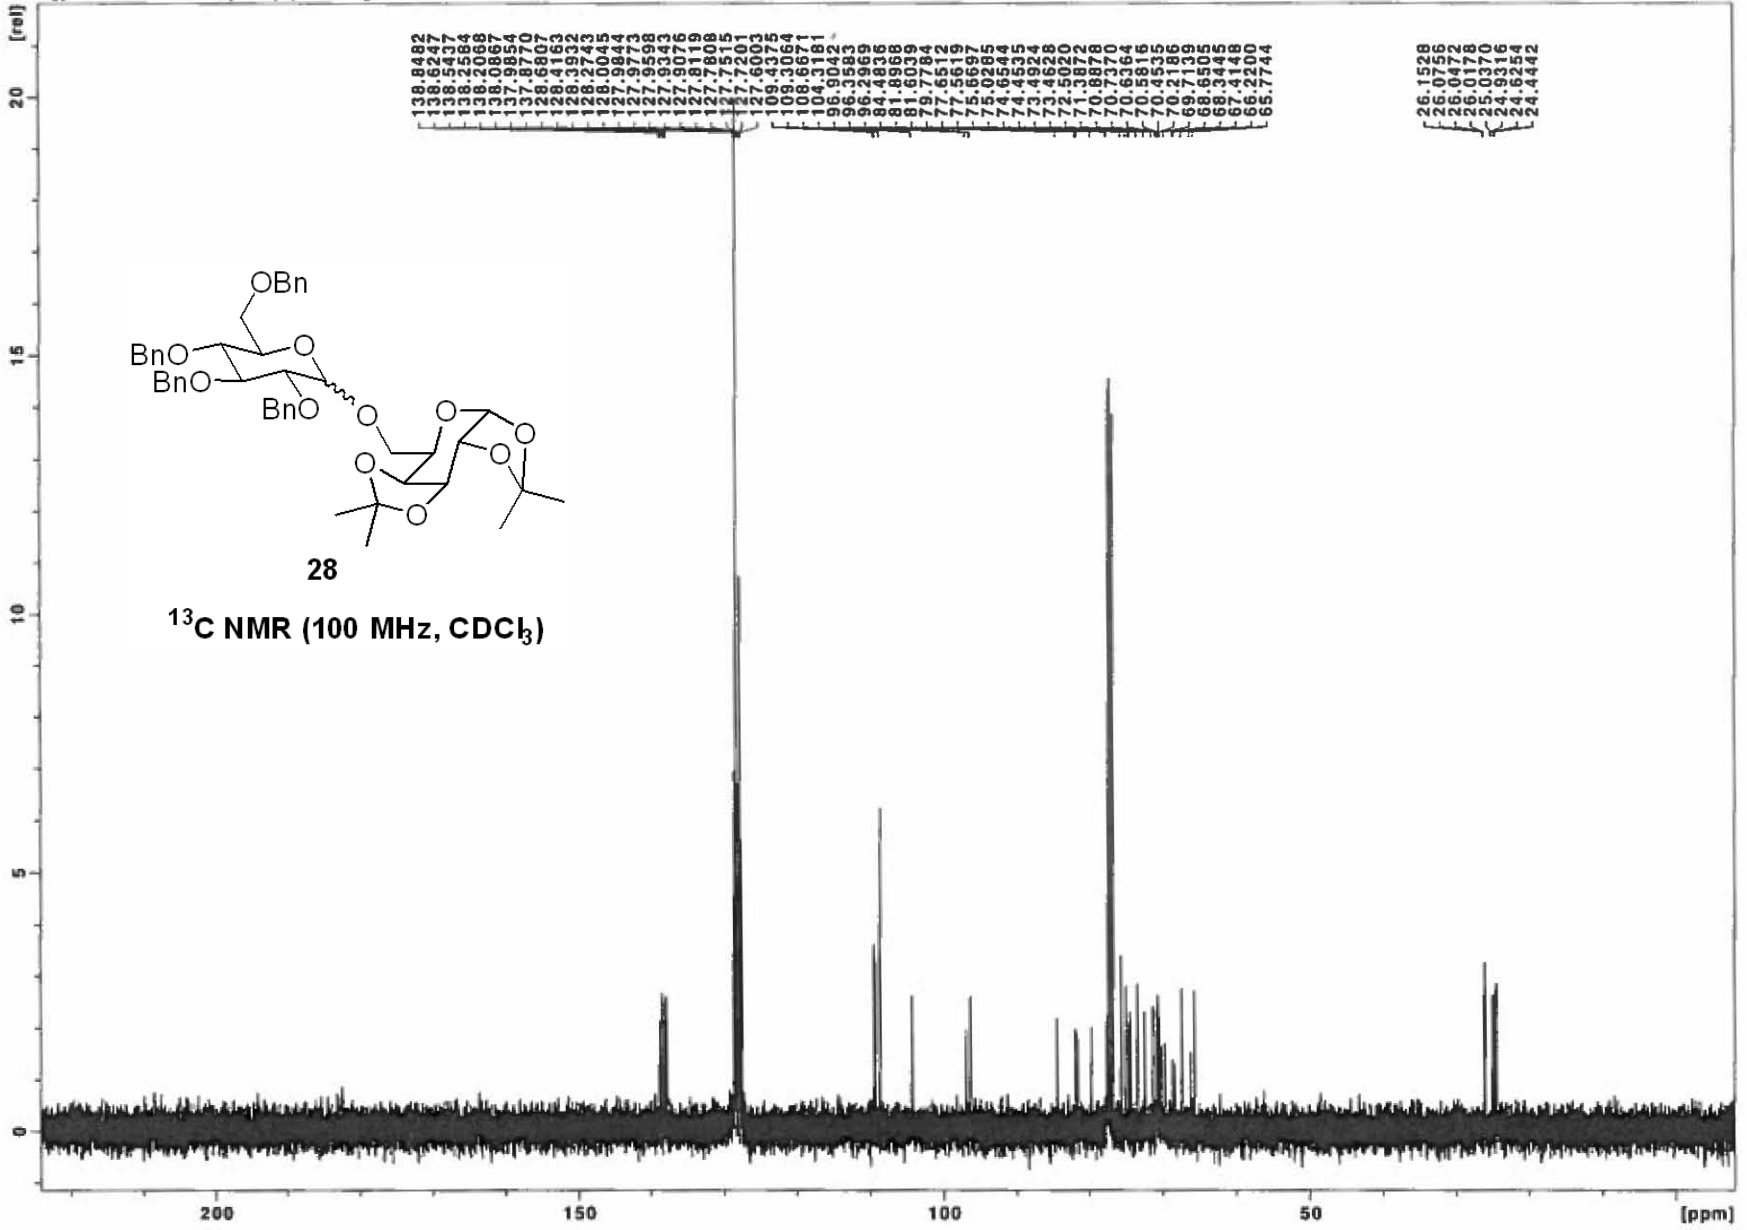

sg-30-1 1 1 J:\gz619263

sg-30-1

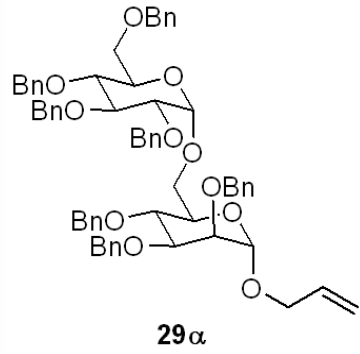

<sup>1</sup>H NMR (500 MHz, CDCl<sub>3</sub>)

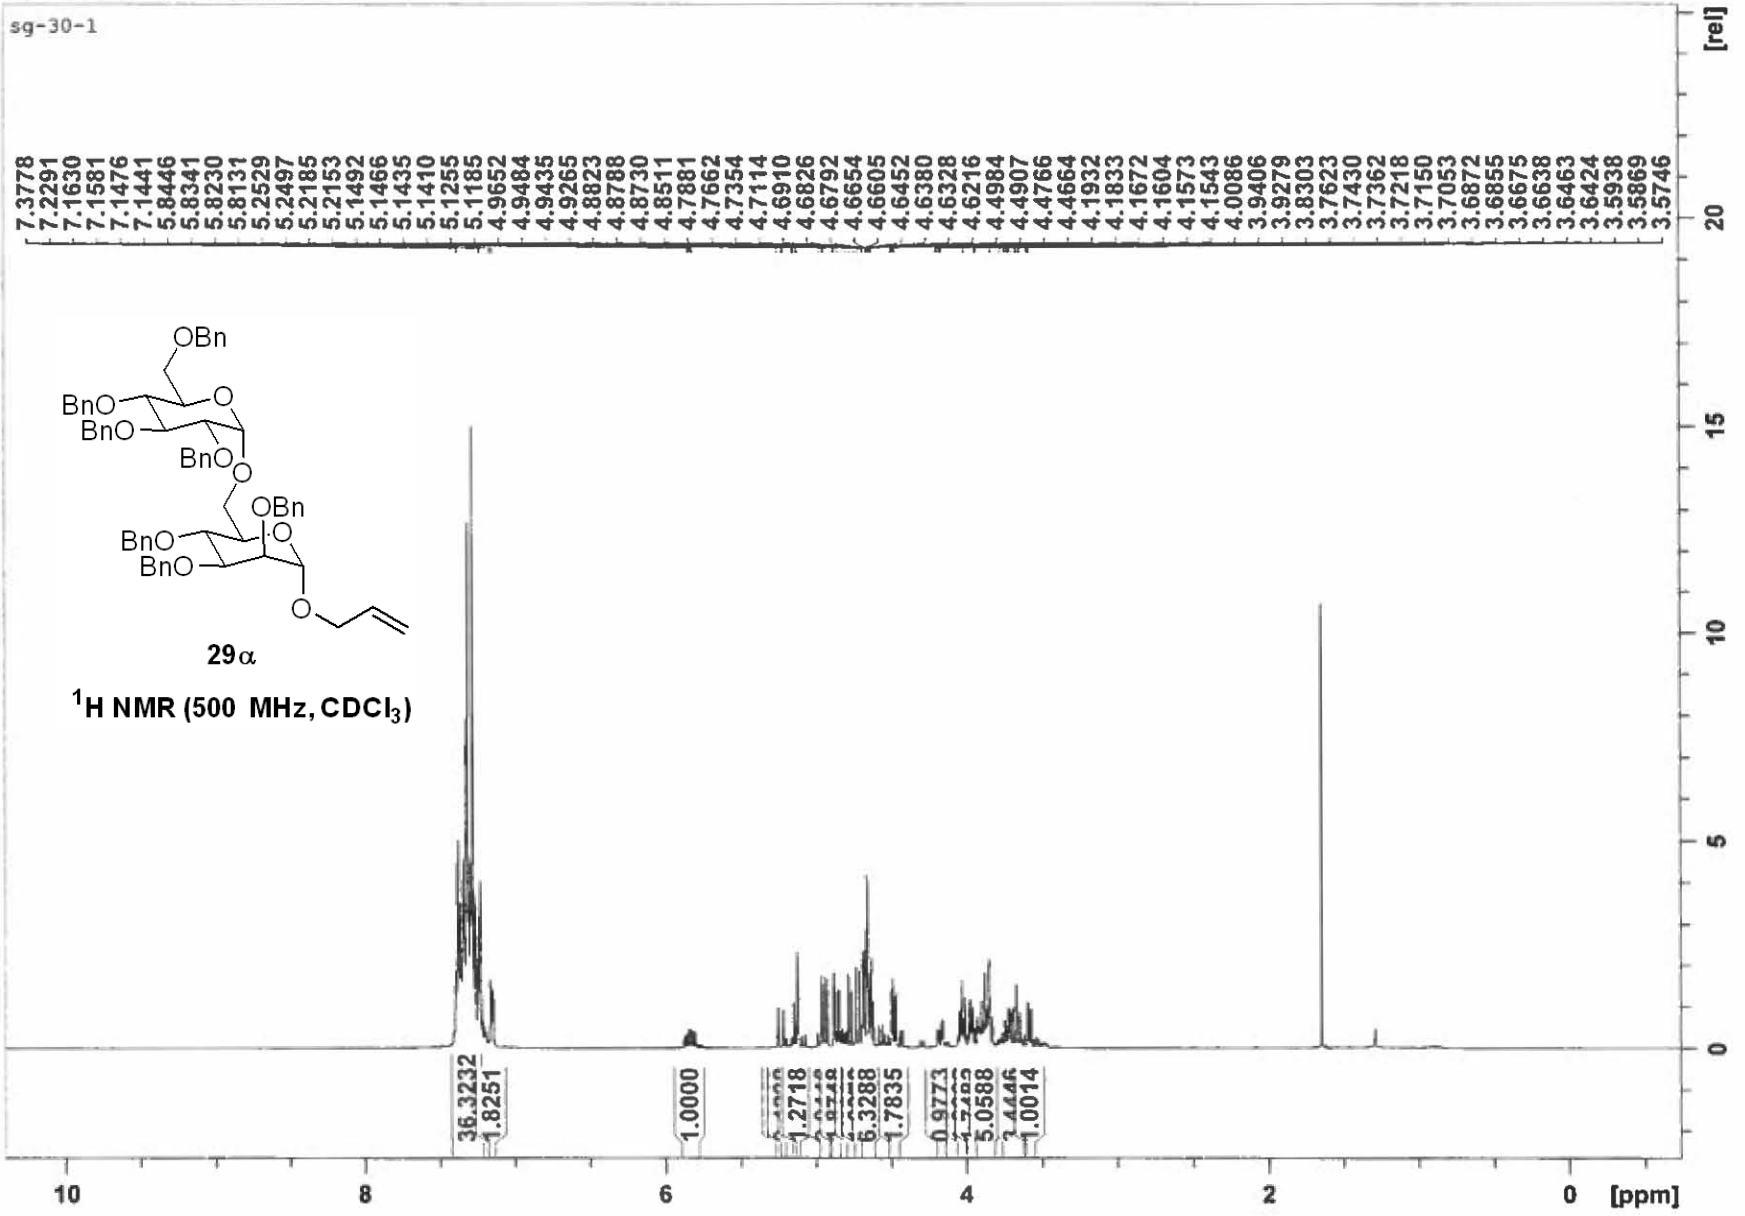

sgc-30-1 1 1 J:\gz619263

sgc-30-1

138.9540  
138.7507  
138.6431  
138.6063  
138.5420  
138.2585  
138.1227  
133.7951  
128.3317  
128.3153  
128.2917  
128.2508  
128.2289  
128.1283  
128.0181  
127.9205  
127.8814  
127.8465  
127.7383  
127.6954  
127.6367  
127.6081  
127.5867  
127.5143  
127.4939  
127.4399  
117.4542  
96.9389  
96.5662  
81.7743  
80.3985  
80.1437  
77.7075  
75.4774  
75.1936  
75.1082  
74.8726  
73.4178  
72.8668  
72.5229  
72.2371  
71.9988  
70.1526  
68.6157  
67.7406  
66.0211

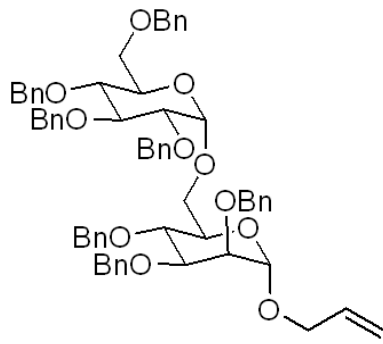

29 $\alpha$

$^{13}\text{C}$  NMR (126 MHz,  $\text{CDCl}_3$ )

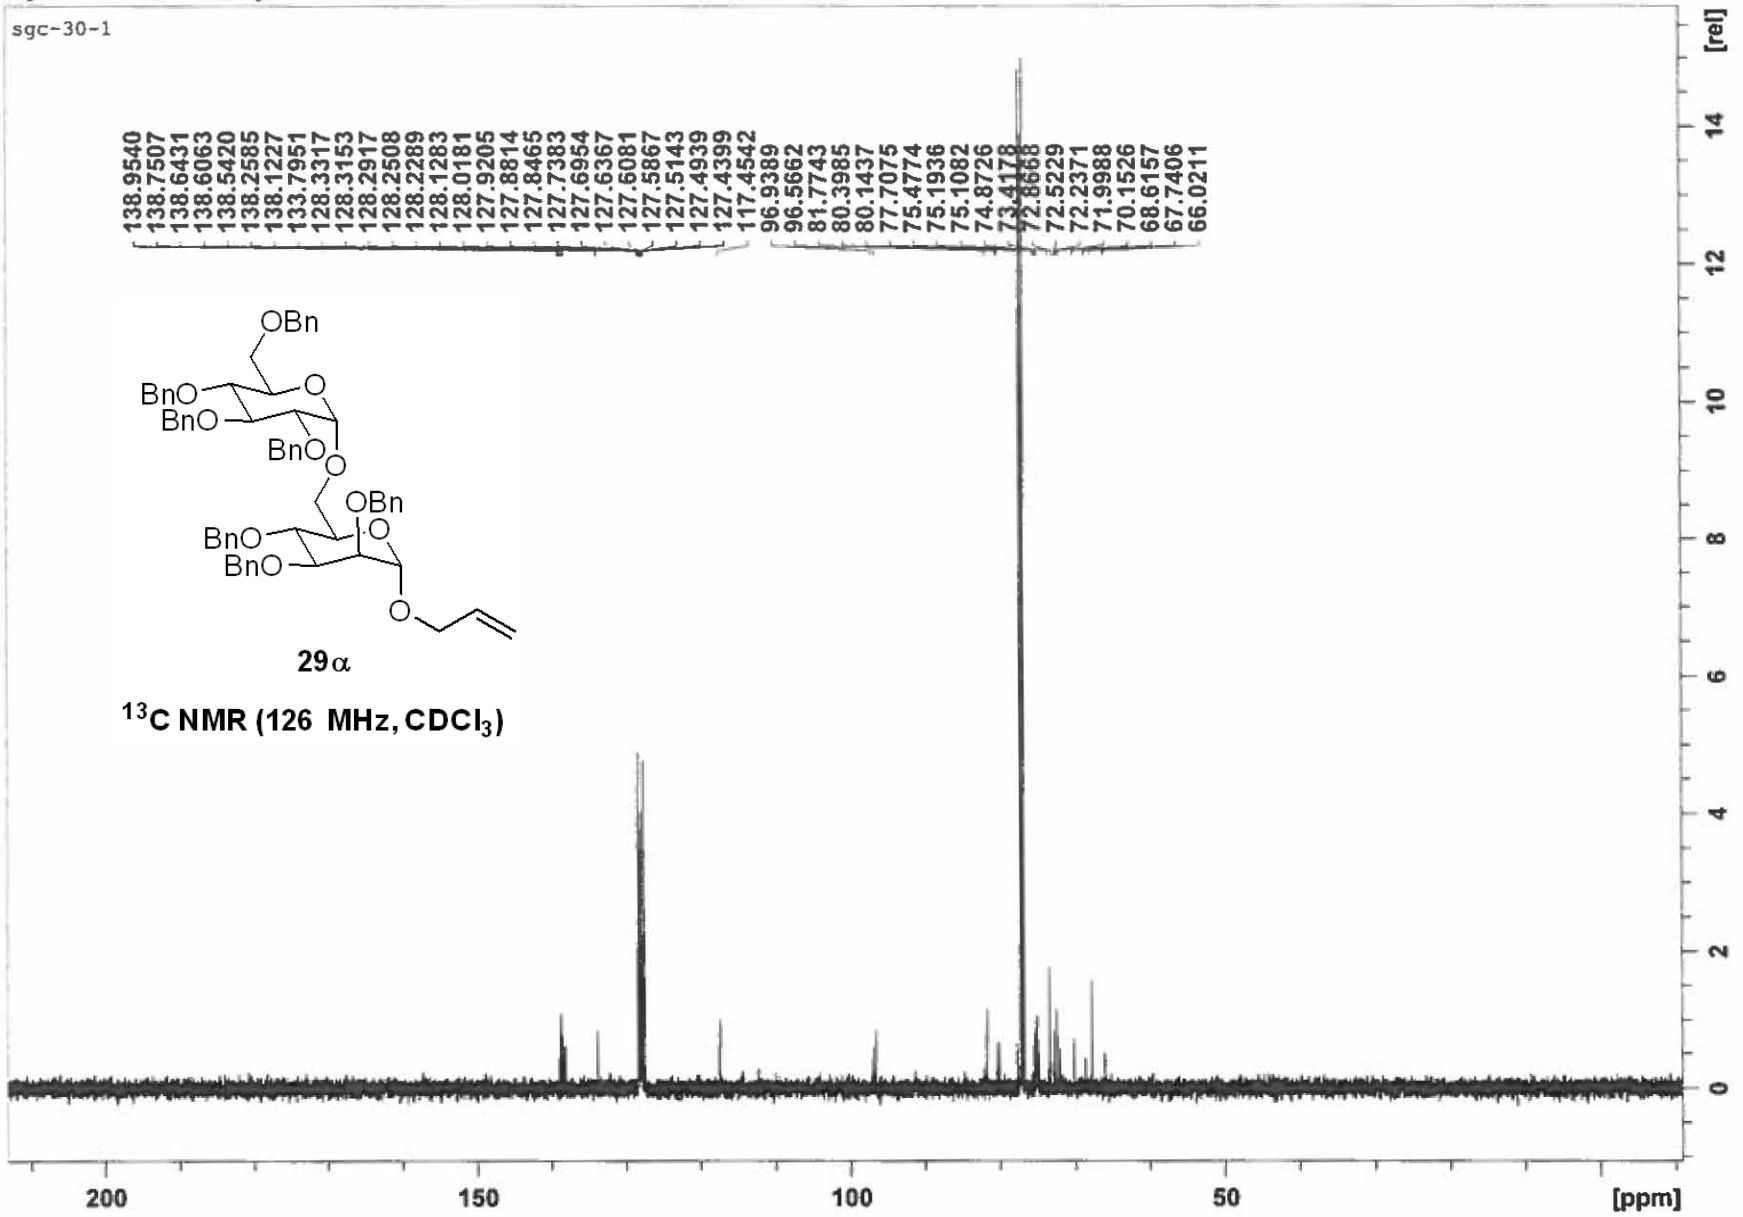



sg-30-2

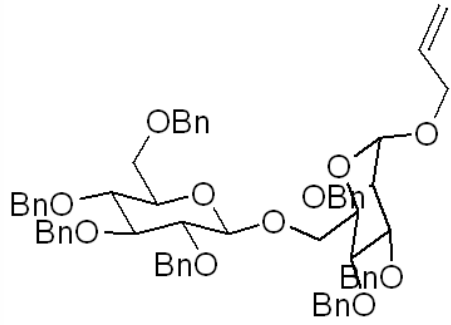

29 $\beta$

$^1\text{H NMR}$  (500 MHz,  $\text{CDCl}_3$ )

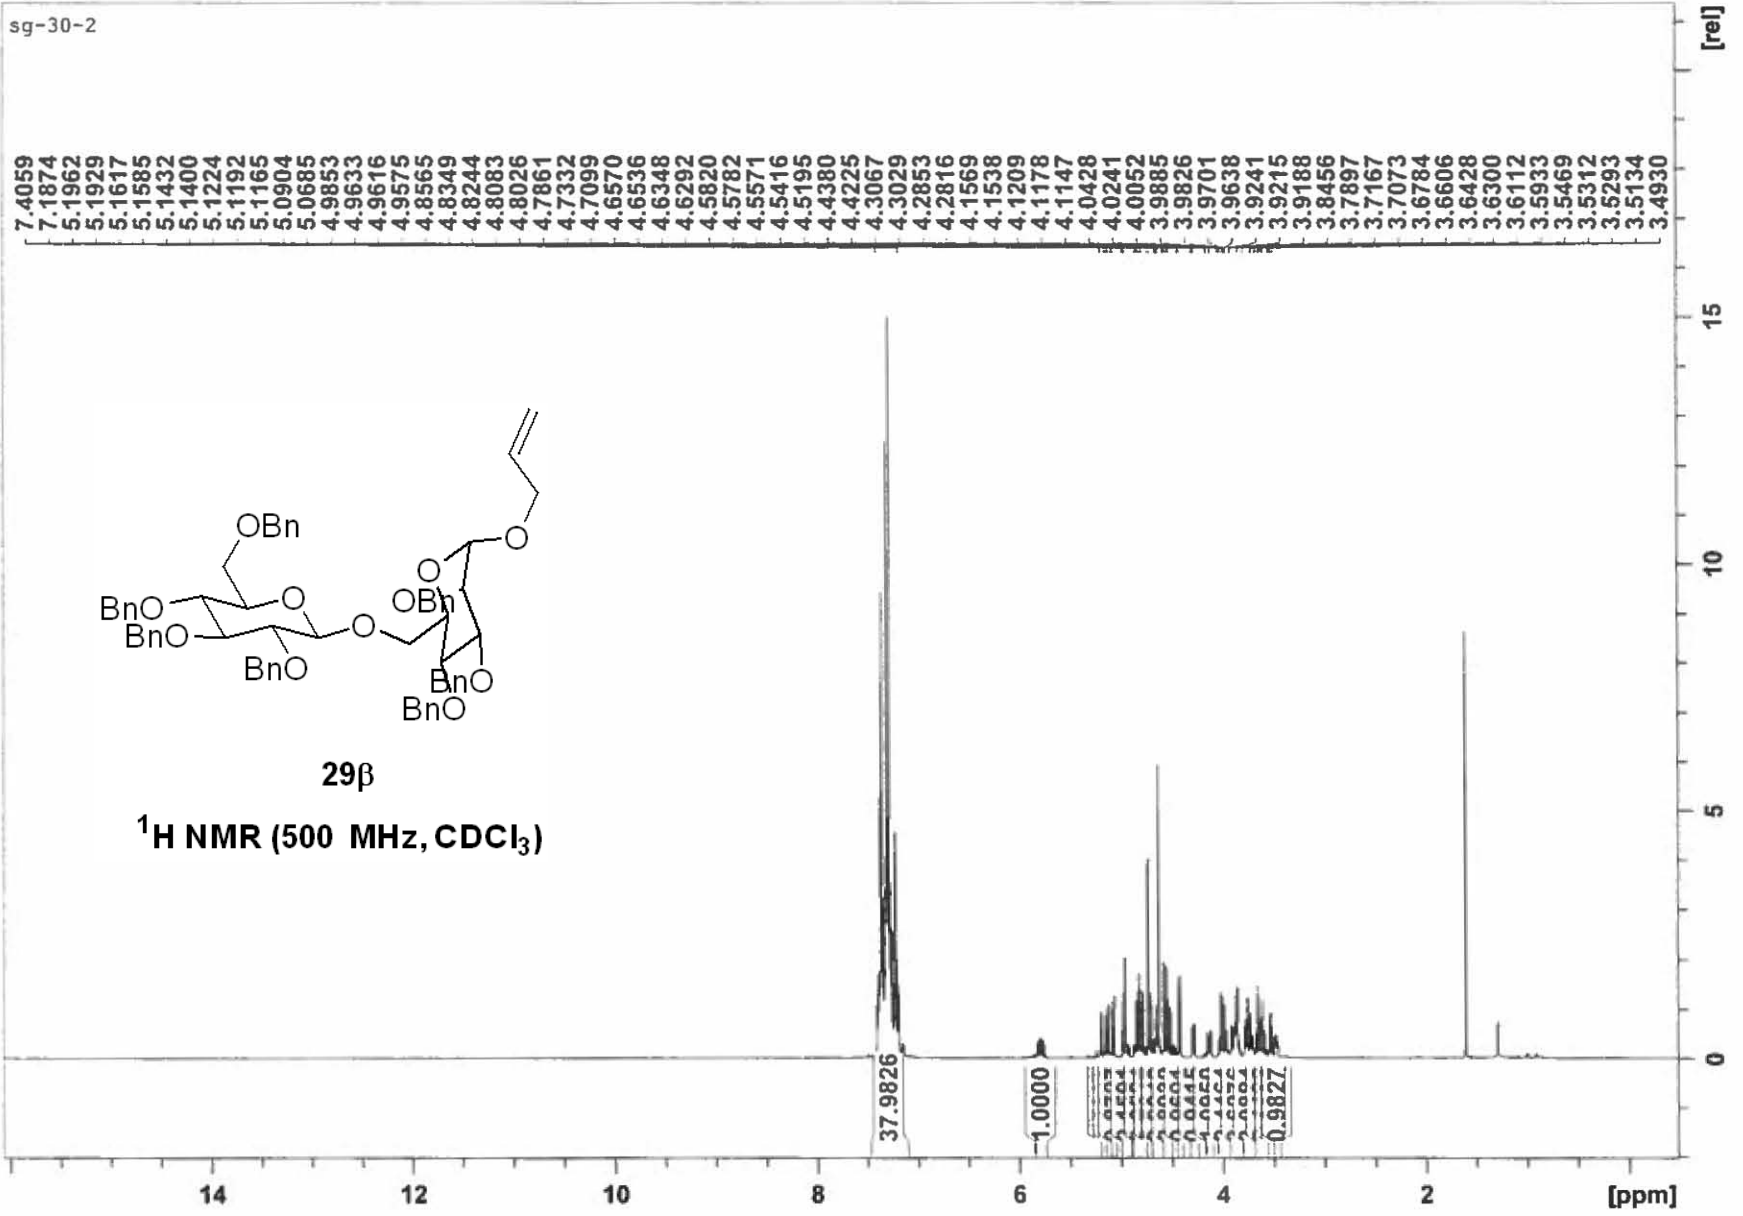

sgc-30-2 1 1 J:\gz619263

sgc-30-2

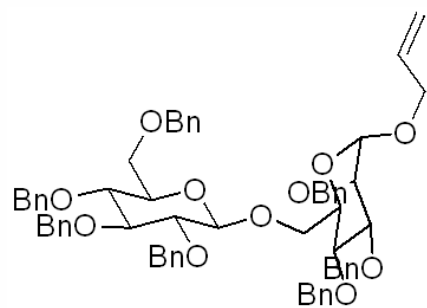

29β

<sup>13</sup>C NMR (125 MHz, CDCl<sub>3</sub>)

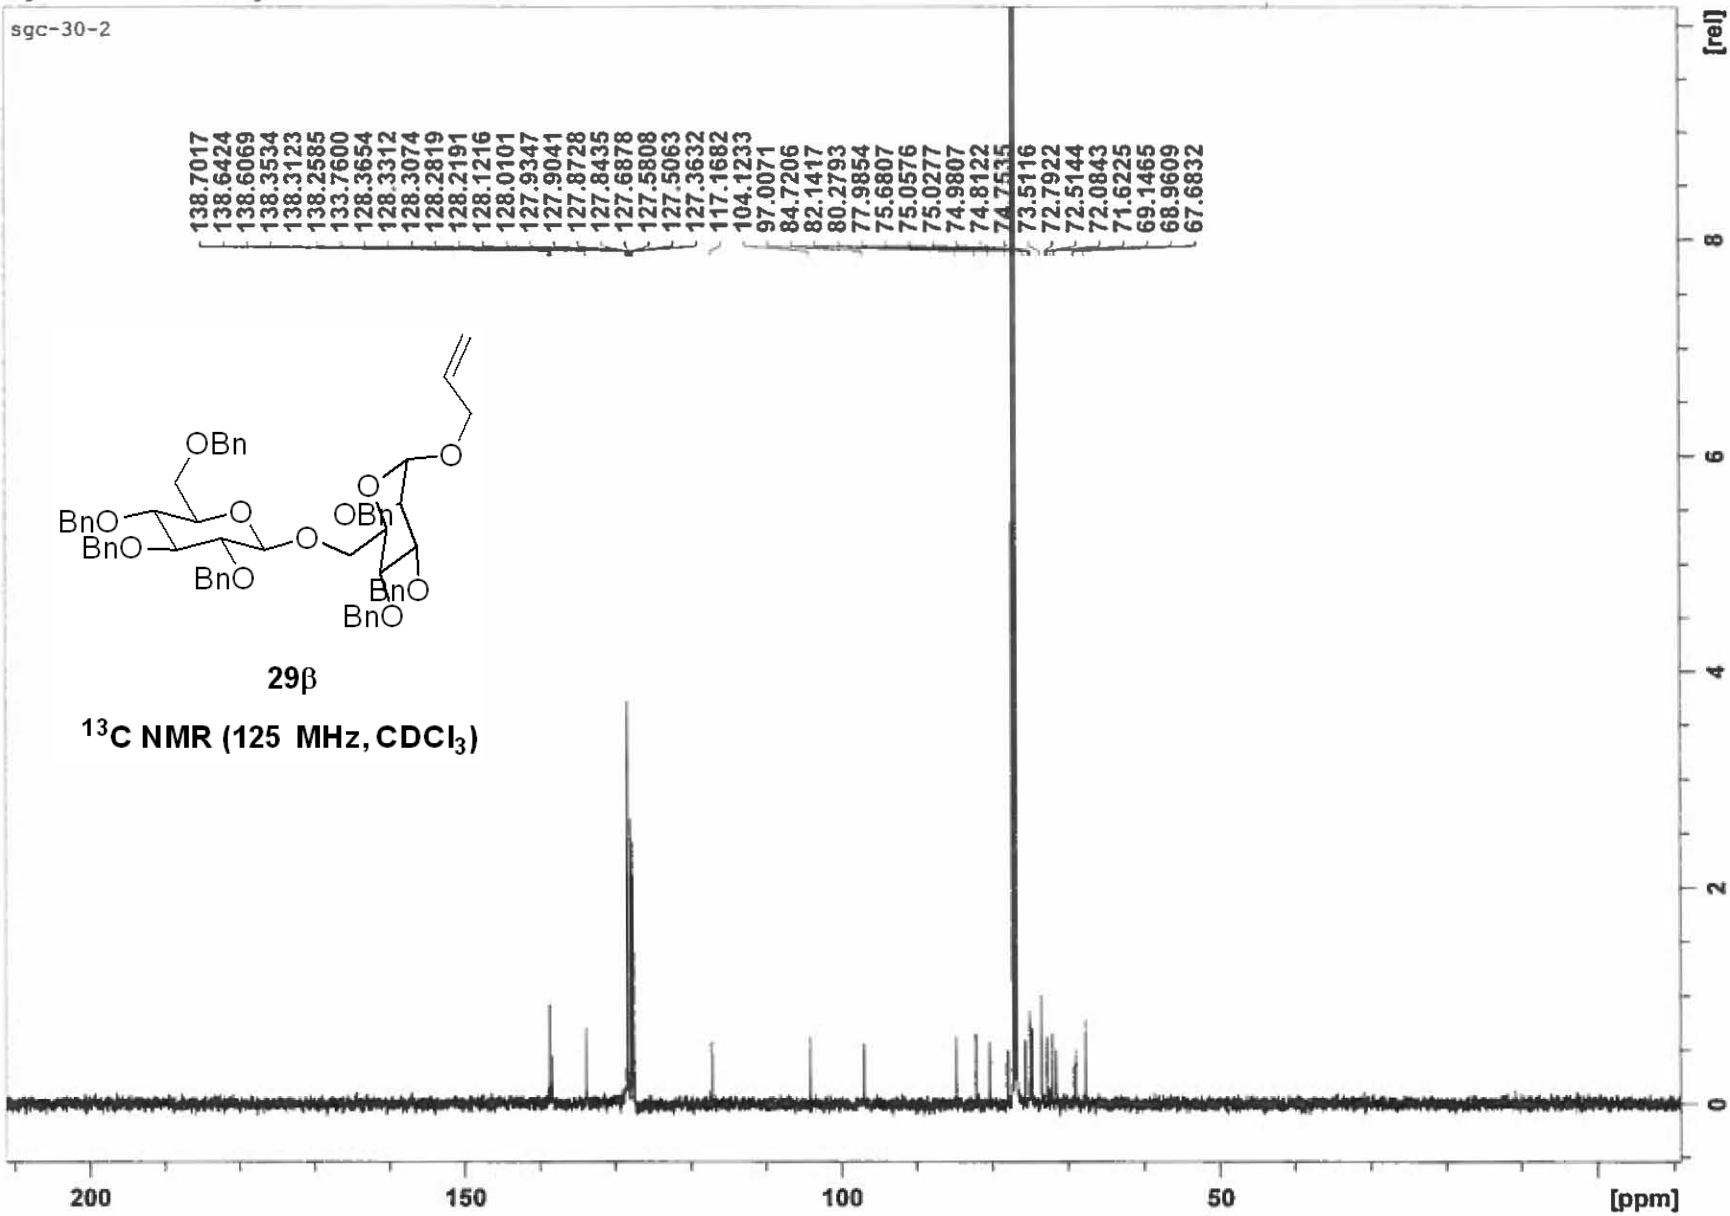

sg-31-1-1 1 1 J:\gz619263

sg-31-1-1

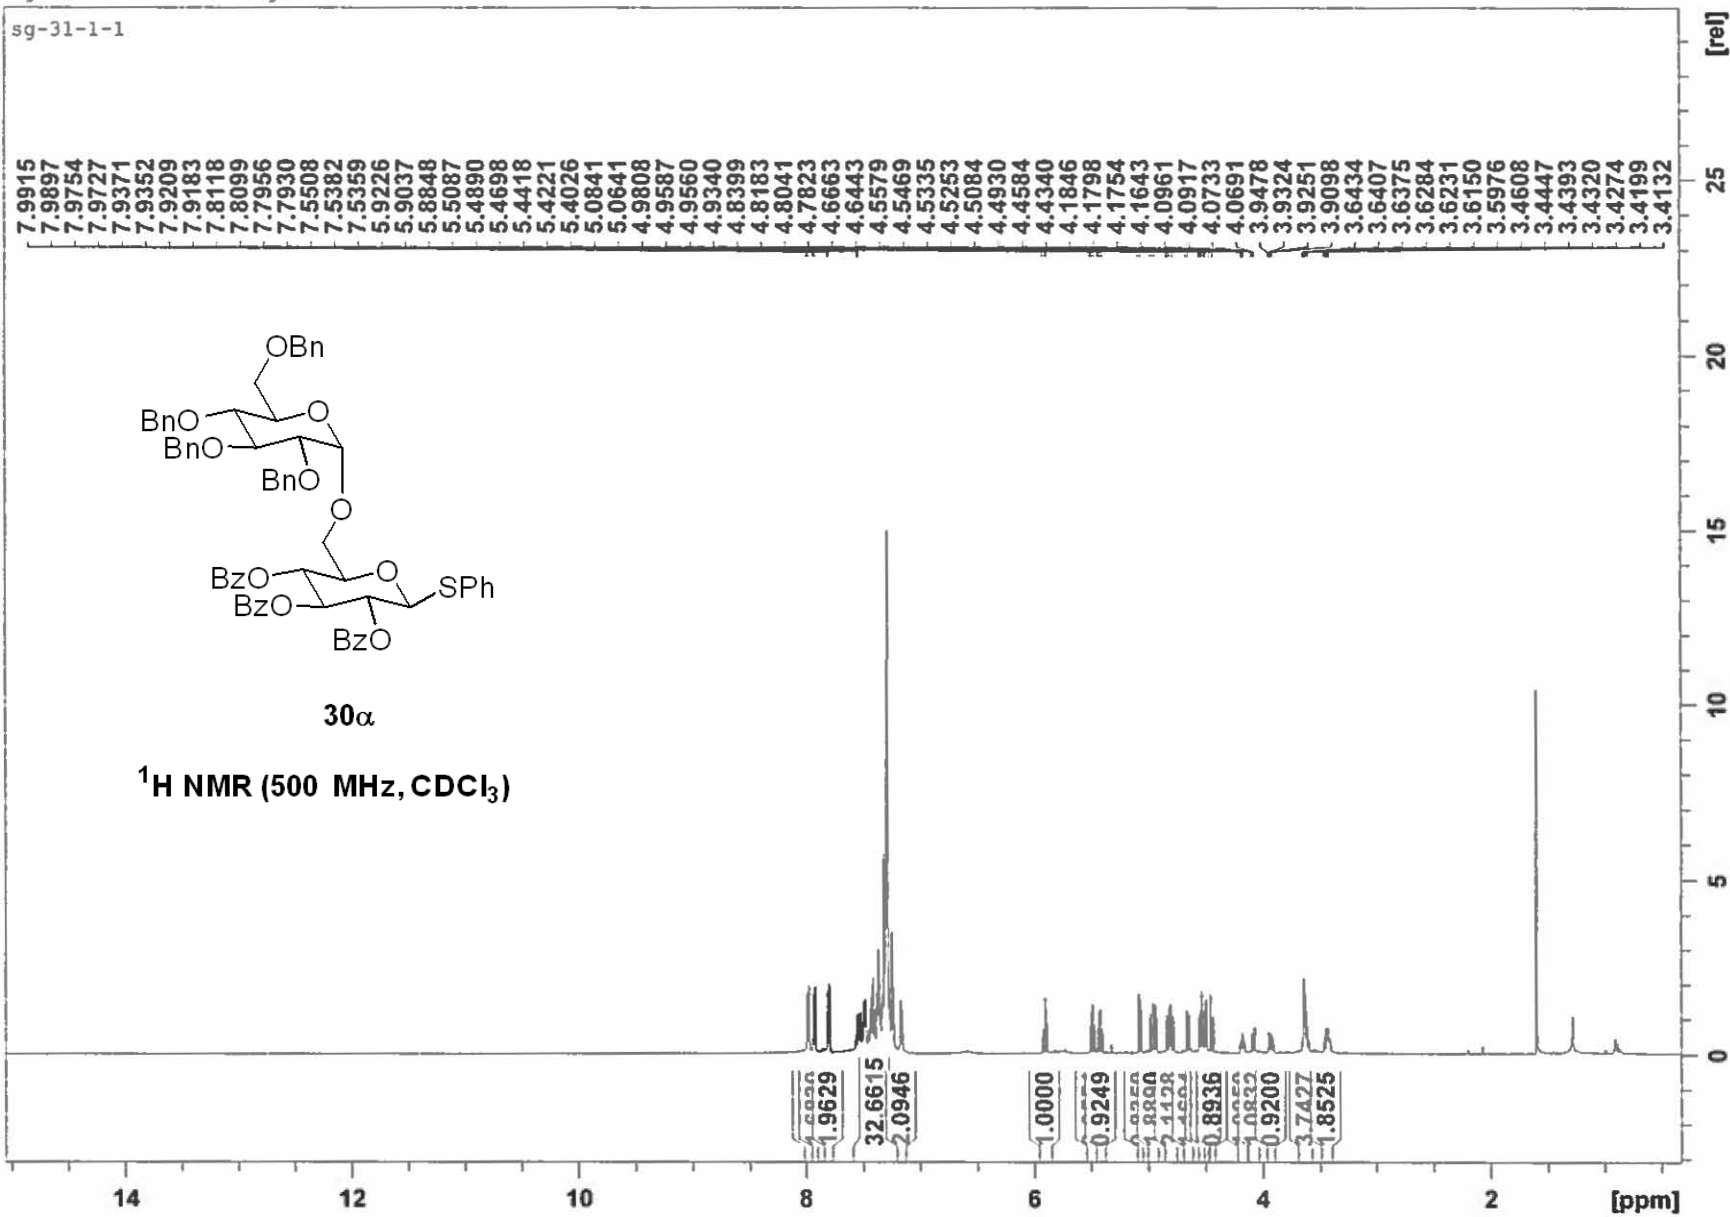

sgc-31-1-1 1 1 J:\gz619263

sgc-31-1-1

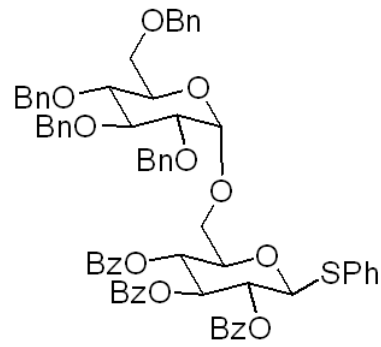

30 $\alpha$

$^{13}\text{C}$  NMR (125 MHz,  $\text{CDCl}_3$ )

165.7489  
165.3680  
165.0467  
138.6487  
138.5419  
138.1711  
138.1158  
133.4430  
133.2636  
133.1552  
132.4202  
132.1214  
129.8671  
129.7247  
129.3095  
128.9608  
128.8921  
128.4247  
128.3508  
128.3092  
128.2470  
127.9816  
127.8968  
127.7679  
127.7066  
127.5738  
103.9300  
85.8318  
84.5664  
82.3448  
78.2988  
77.6935  
75.6758  
74.9385  
74.8613  
74.8193  
74.3331  
73.4884  
70.5666  
69.8666  
68.9595  
68.7303

[rel]

4

3

2

1

0

200

150

100

50

[ppm]

sg-31-2

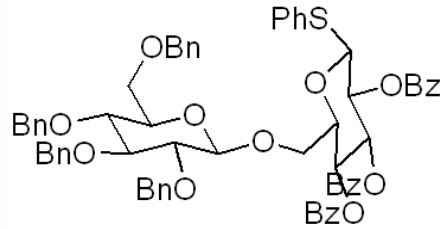

30β

<sup>1</sup>H NMR (500 MHz, CDCl<sub>3</sub>)

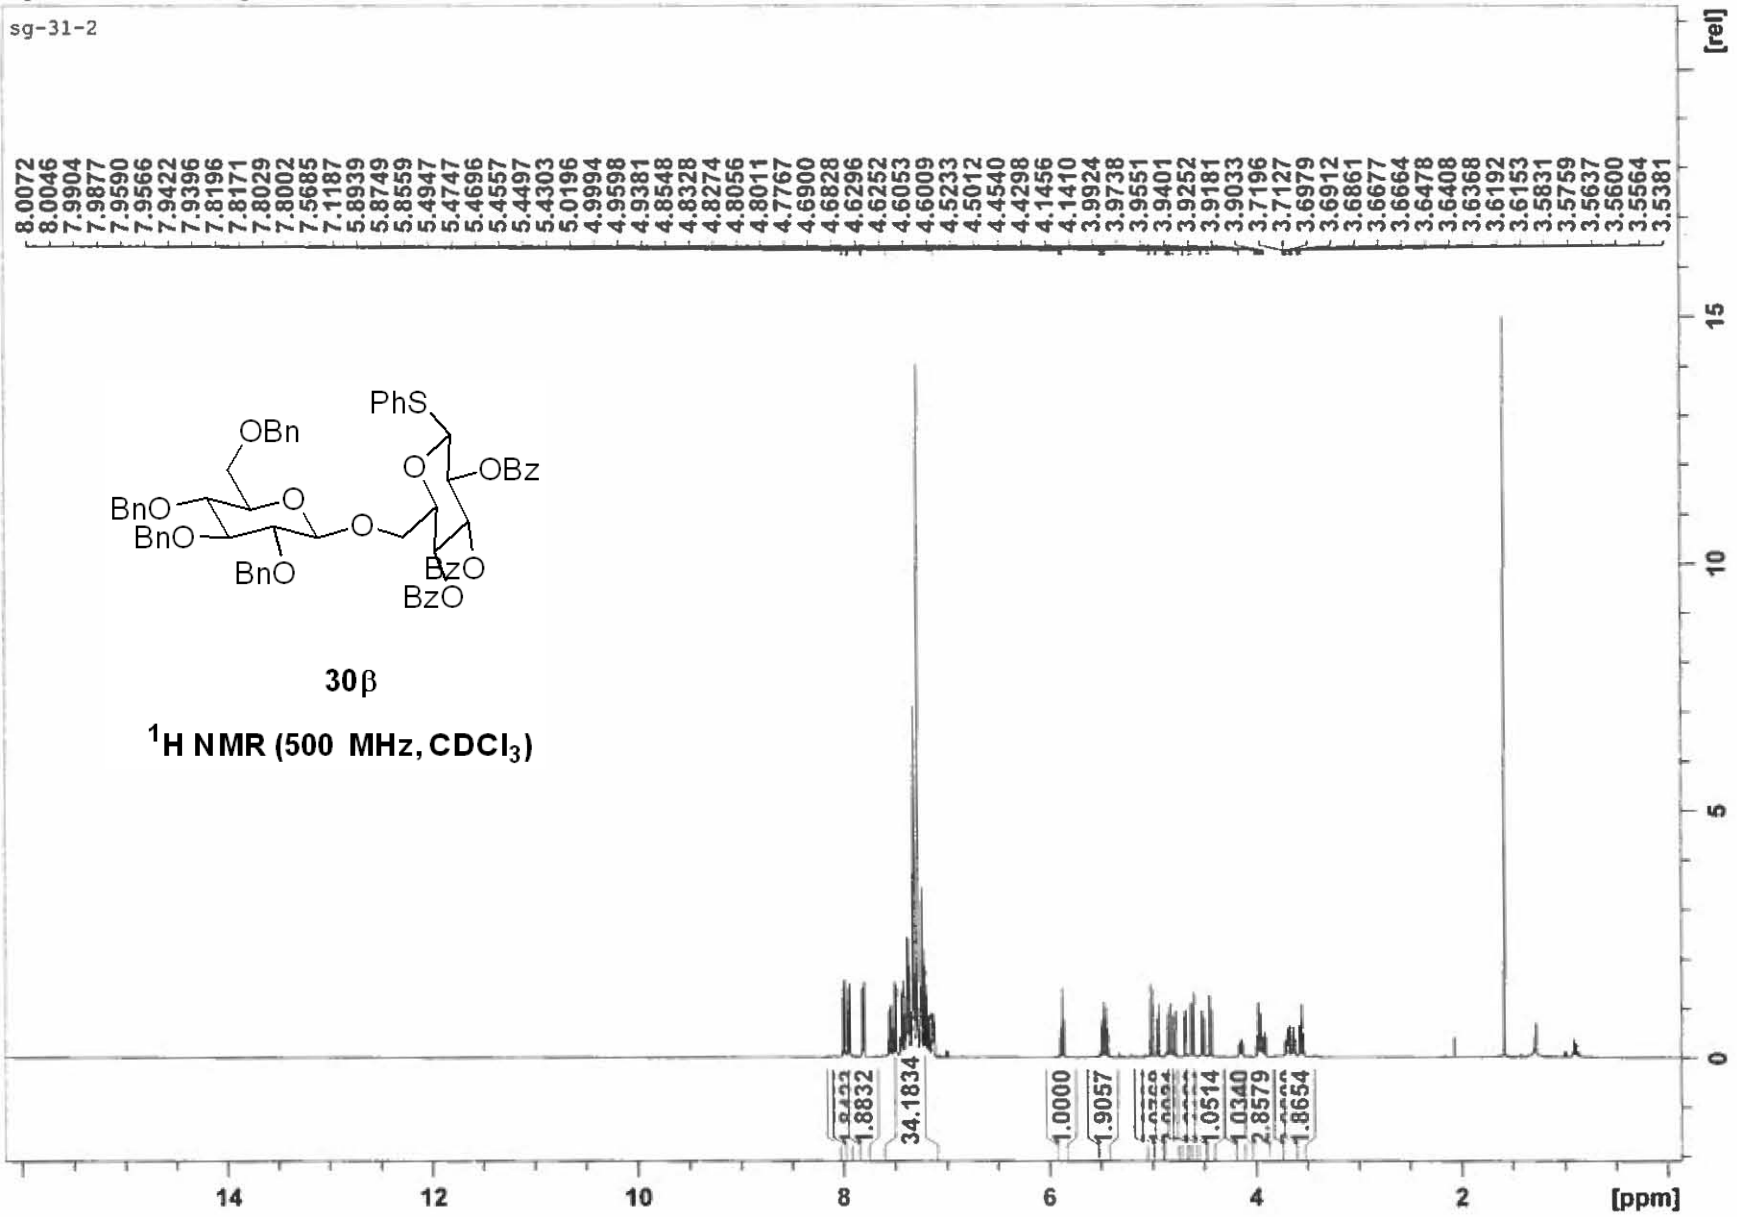

sgc-31-2

sgc-32-2-new 1 1 J:\gz619263

sgc-32-2-new

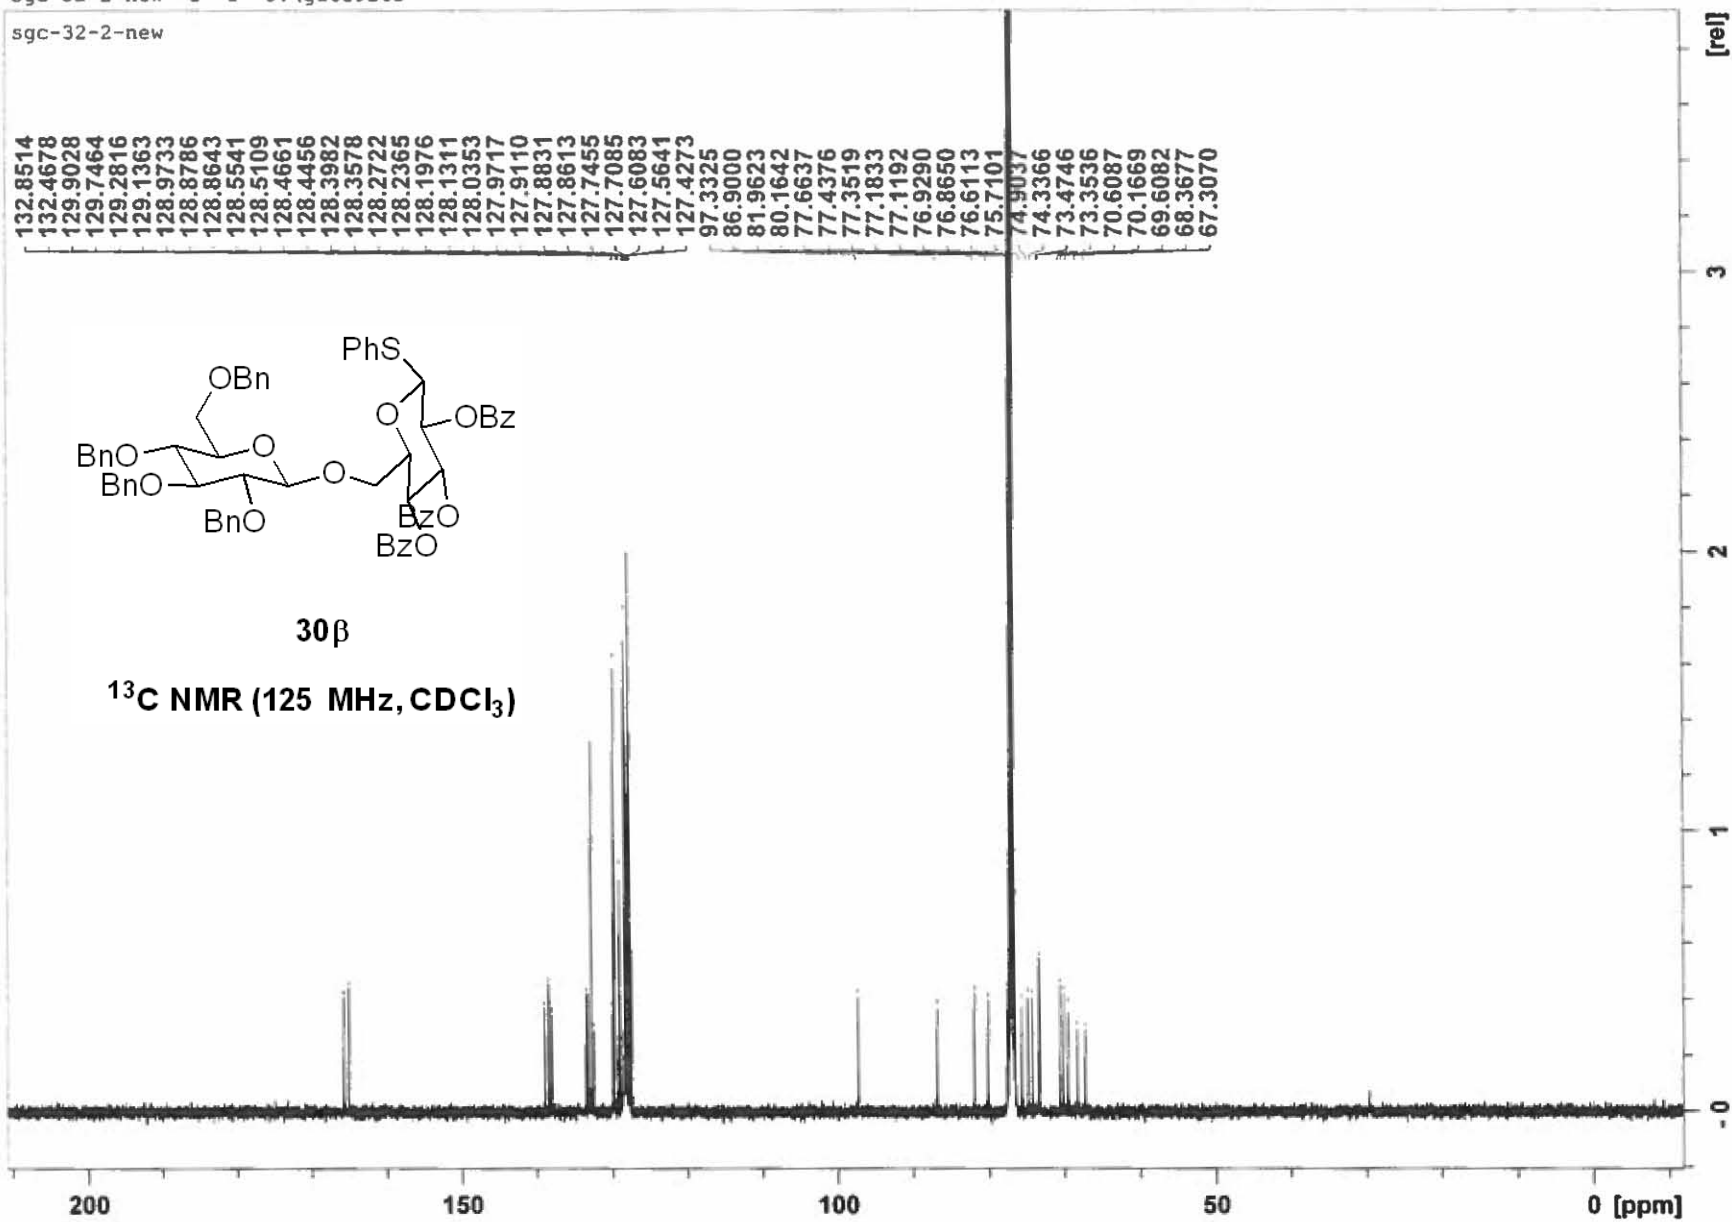

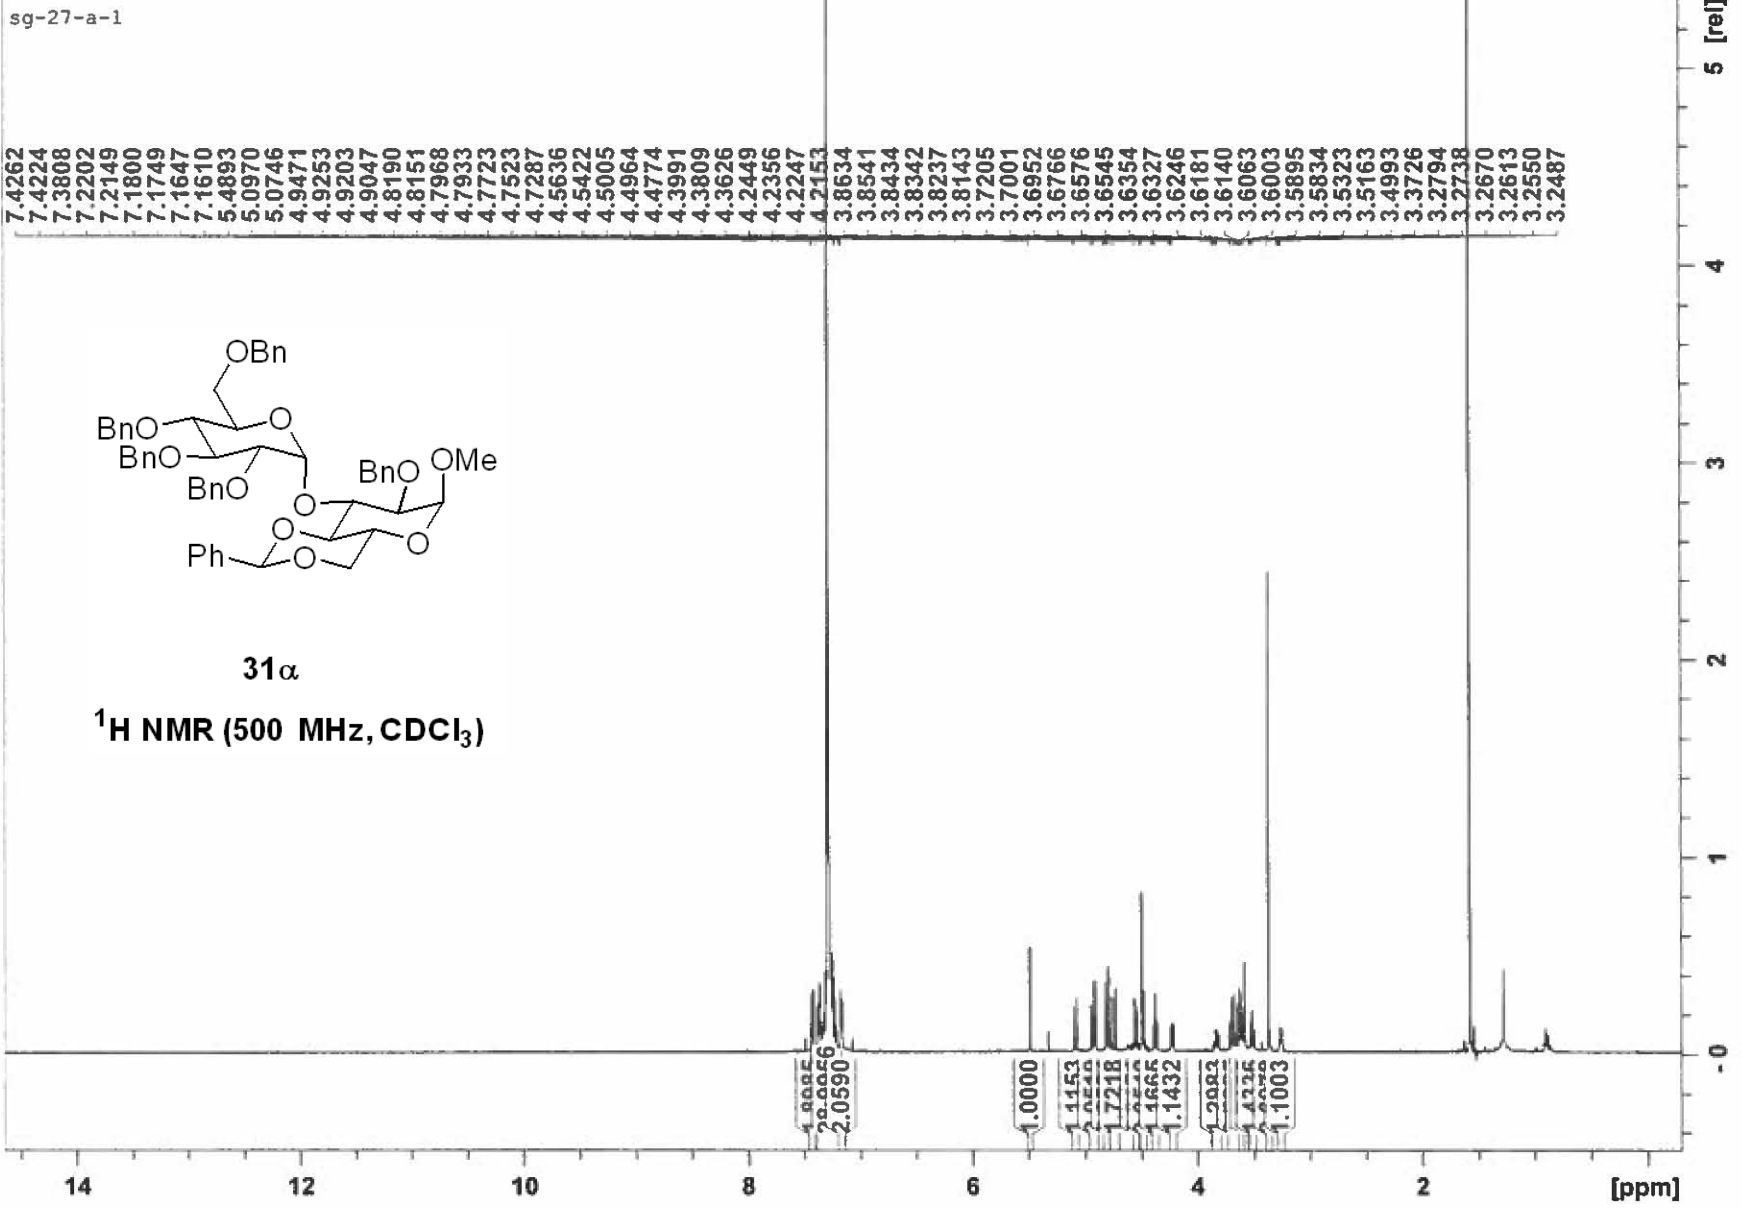

zgy-sgc-27-a-2019new 1 1 J:\gz619263

zgy-sgc-27-a-2019new

138.8805  
138.7481  
138.5063  
138.2524  
138.1192  
137.4105  
134.4607  
129.7584  
129.0082  
128.8664  
128.4316  
128.3609  
128.3306  
128.2587  
128.2297  
128.1087  
128.0186  
127.9326  
127.9130  
127.8587  
127.8187  
127.6867  
127.6290  
127.5085  
127.4166  
126.1790  
102.5137  
101.4727  
98.7268  
84.9363  
82.9475  
80.4782  
80.3580  
78.0253  
75.8434  
75.5990  
74.9328  
74.6240  
74.7467  
73.7905  
73.5406  
69.0597  
68.7180  
62.1592  
55.3132

— 29.7094

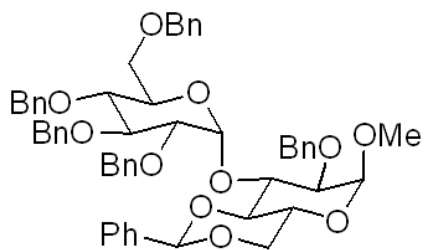

31 $\alpha$

$^{13}\text{C}$  NMR (125 MHz,  $\text{CDCl}_3$ )

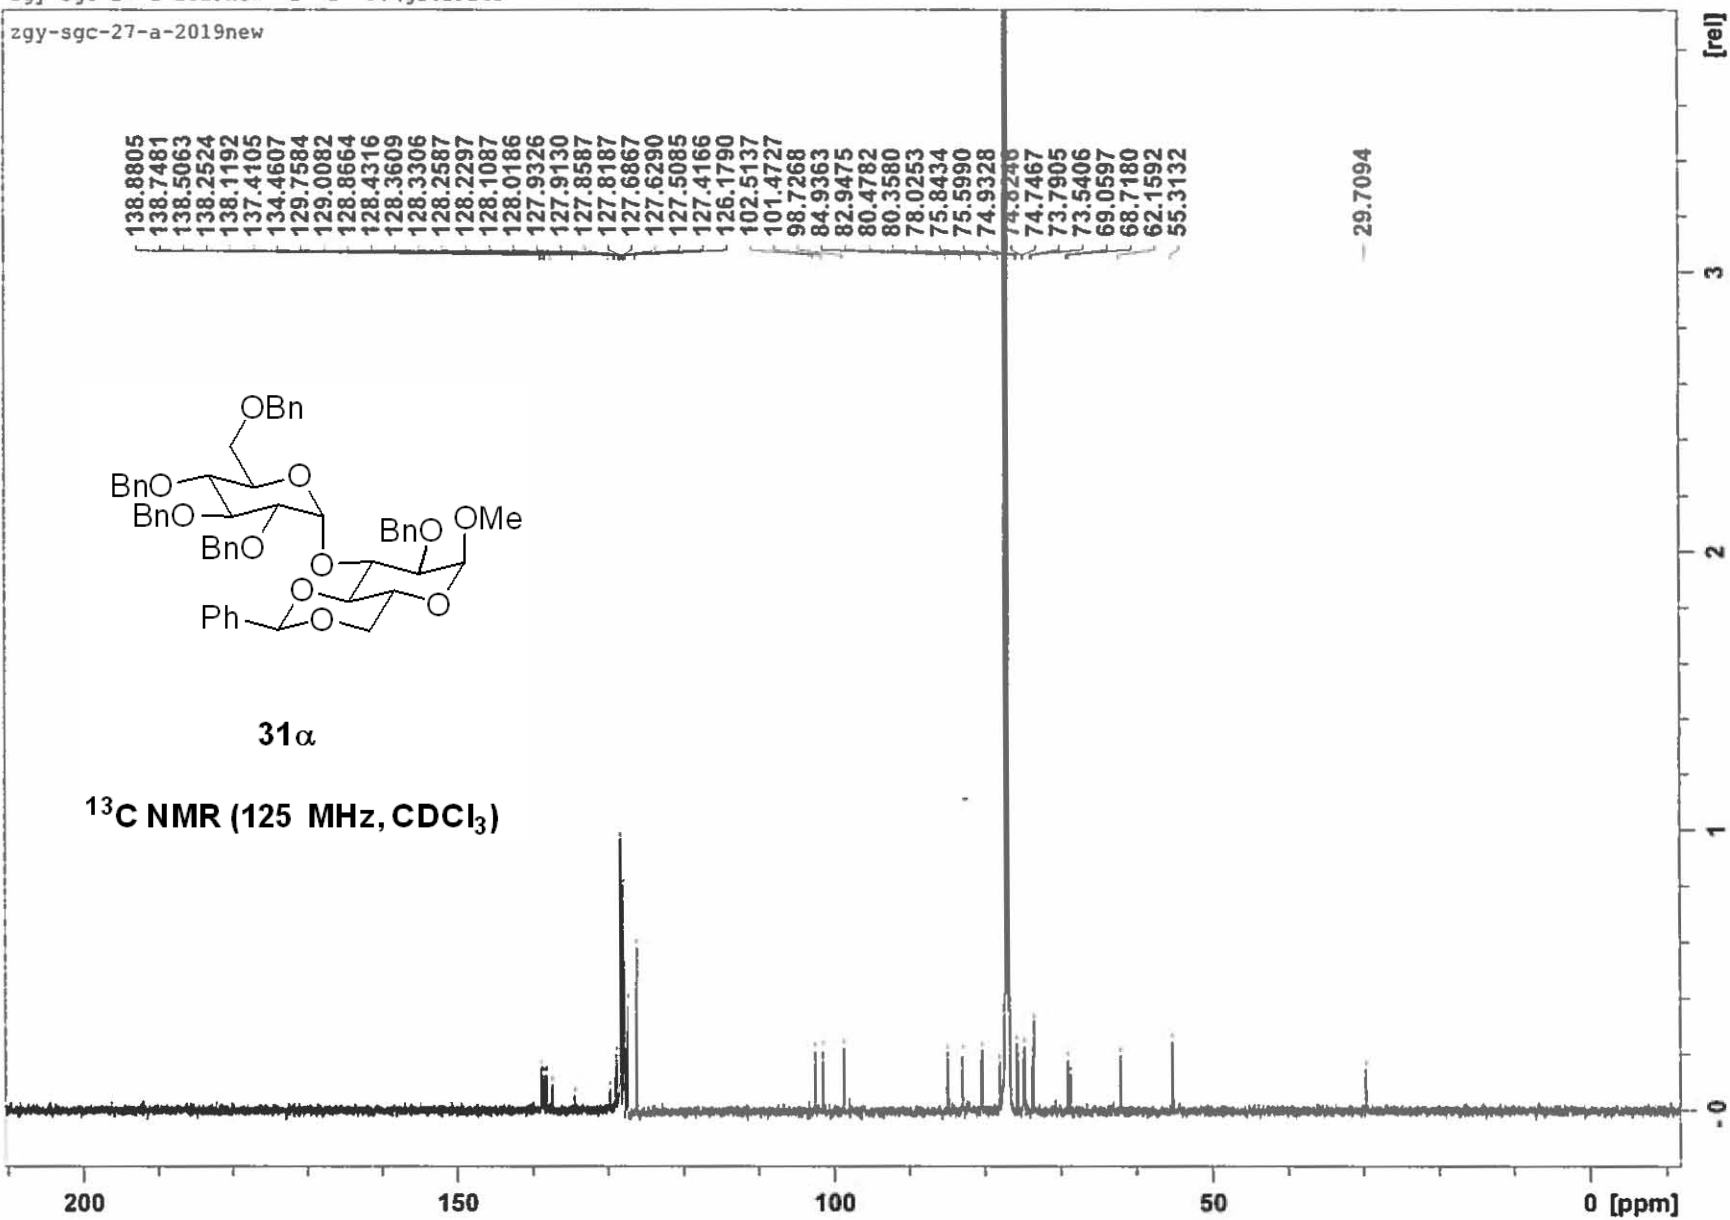



sg-27-b-2 1 1 J:\gz619263

sg-27-b-2

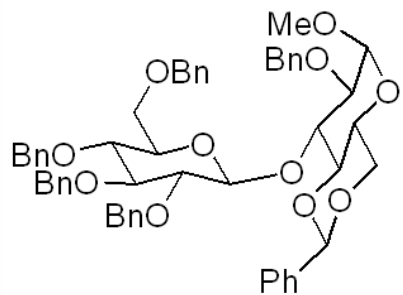

31β

<sup>1</sup>H NMR (500 MHz, CDCl<sub>3</sub>)

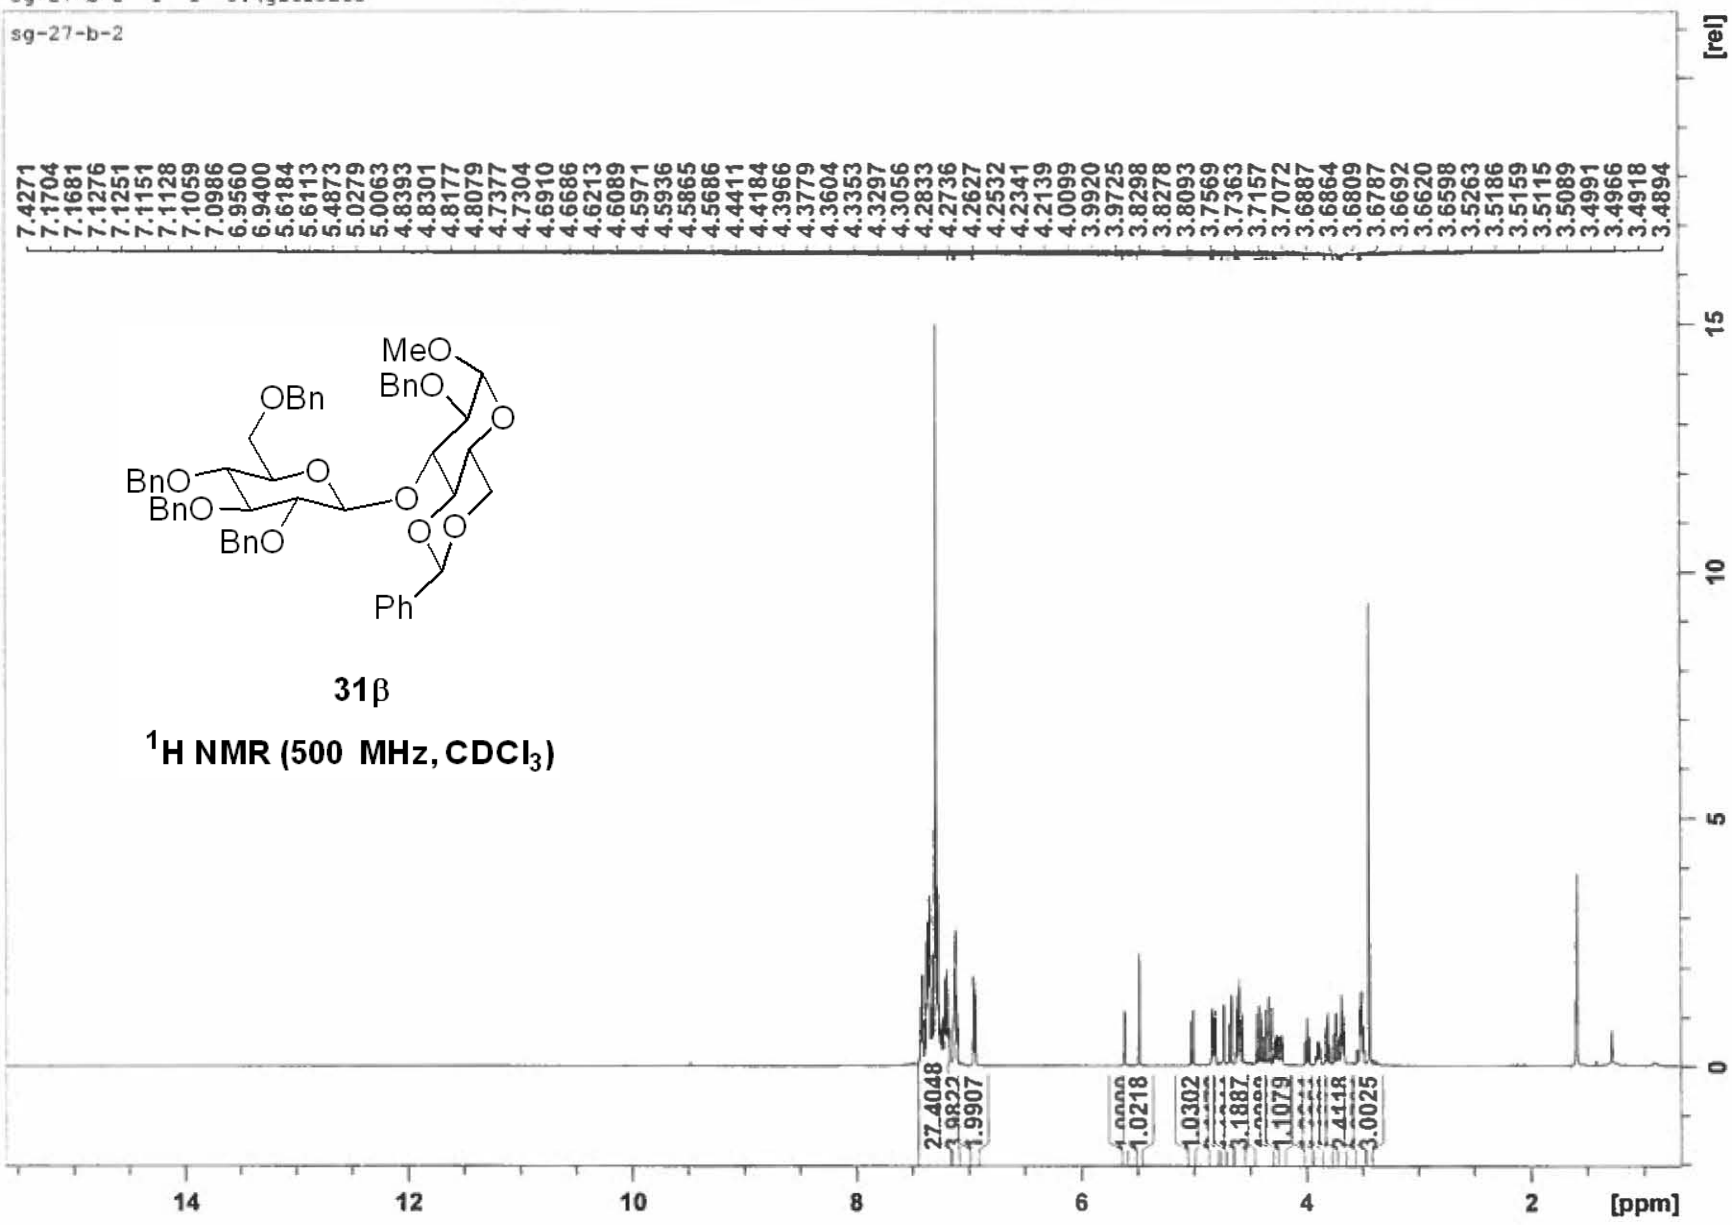

sgc-27-b 1 1 J:\qz619263

sgc-27-b

139.0363  
138.9324  
138.1375  
137.8916  
137.4942  
137.1211  
129.3728  
128.6845  
128.5248  
128.4605  
128.4112  
128.2728  
128.2286  
128.1402  
128.1287  
128.1062  
127.9903  
127.8893  
127.7301  
127.6121  
127.5212  
127.4116  
127.3609  
127.3051  
126.4232  
102.1269  
98.5645  
96.1535  
82.9756  
81.6861  
78.8806  
78.0827  
77.5706  
77.4409  
77.1227  
76.8698  
76.6164  
75.5260  
74.7828  
73.4260  
73.3528  
72.7457  
71.1581  
69.8451  
69.2285  
68.2293  
61.8259  
55.3468

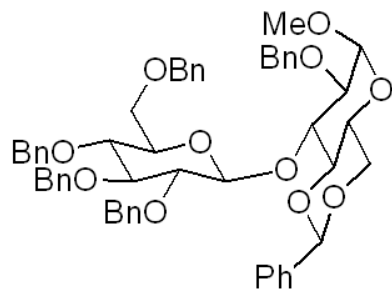

31β

<sup>13</sup>C NMR (125 MHz, CDCl<sub>3</sub>)

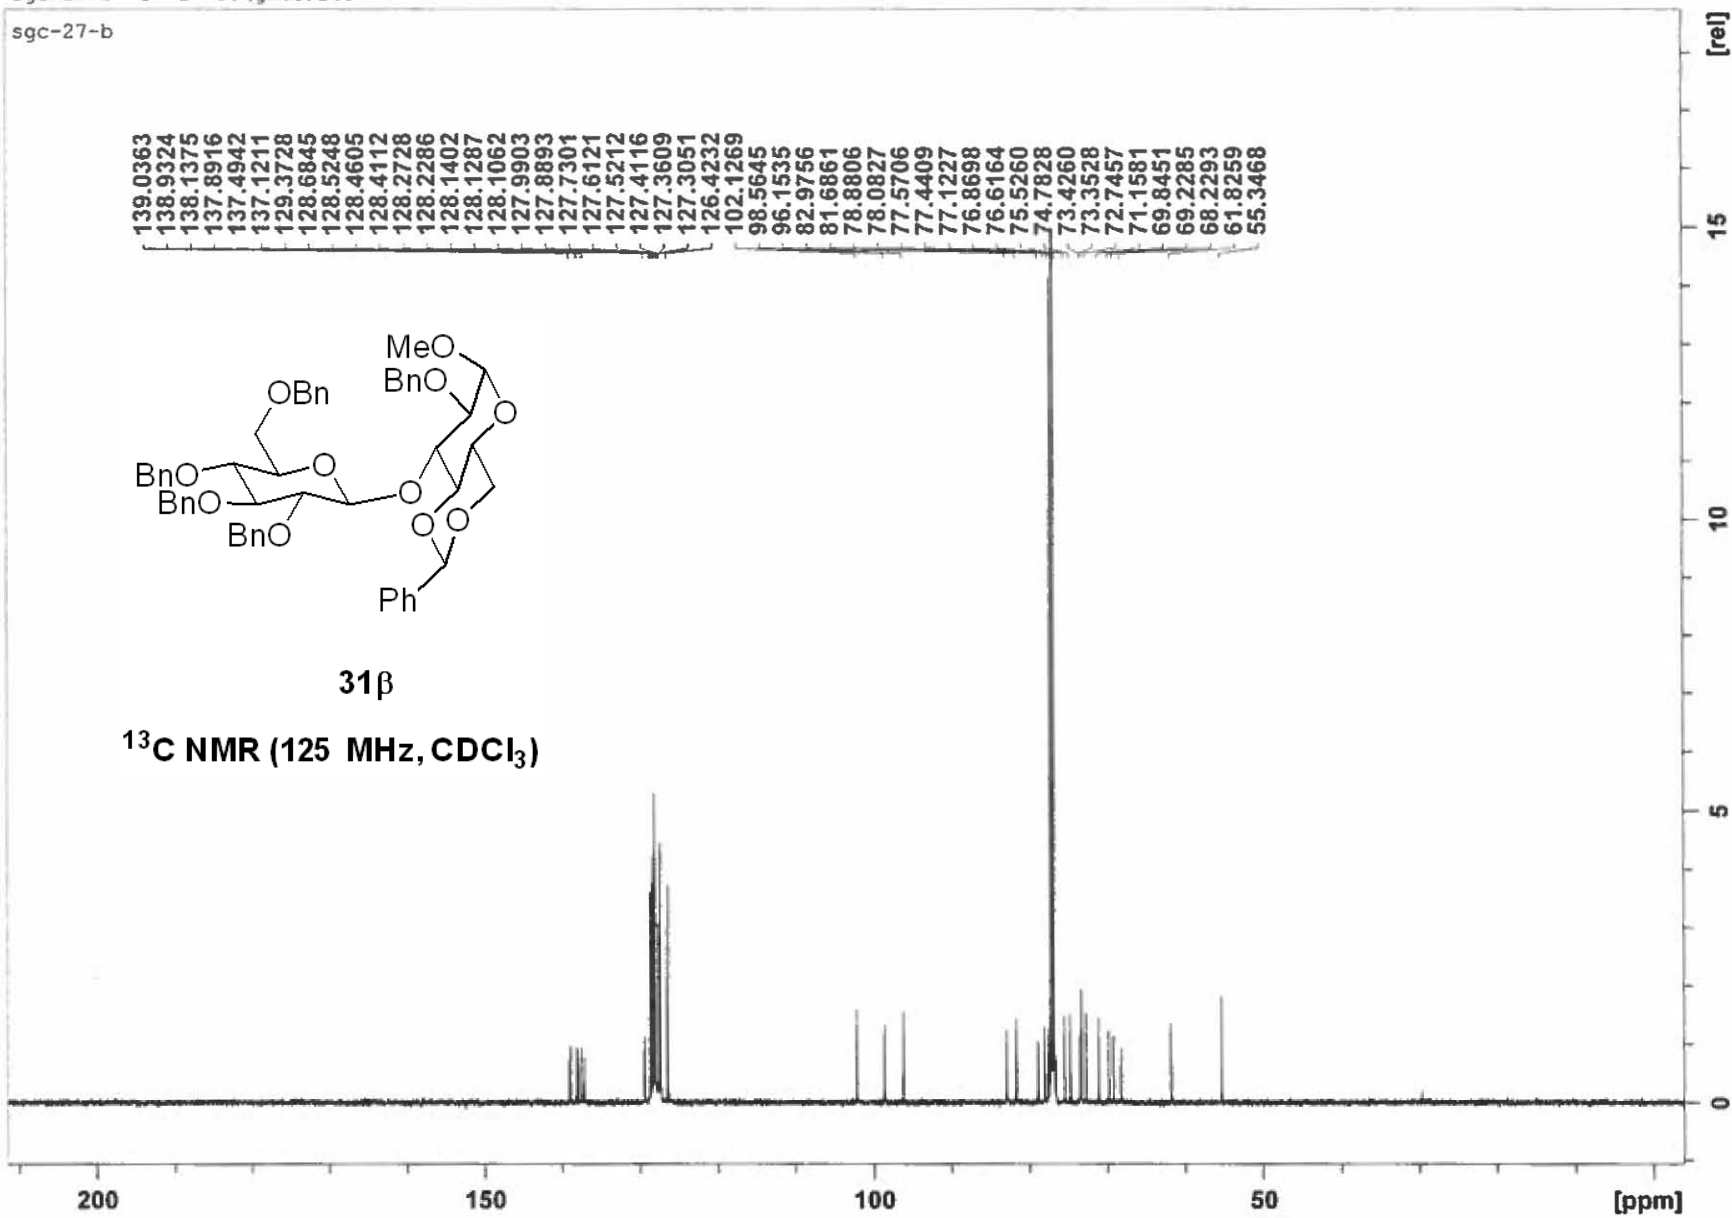

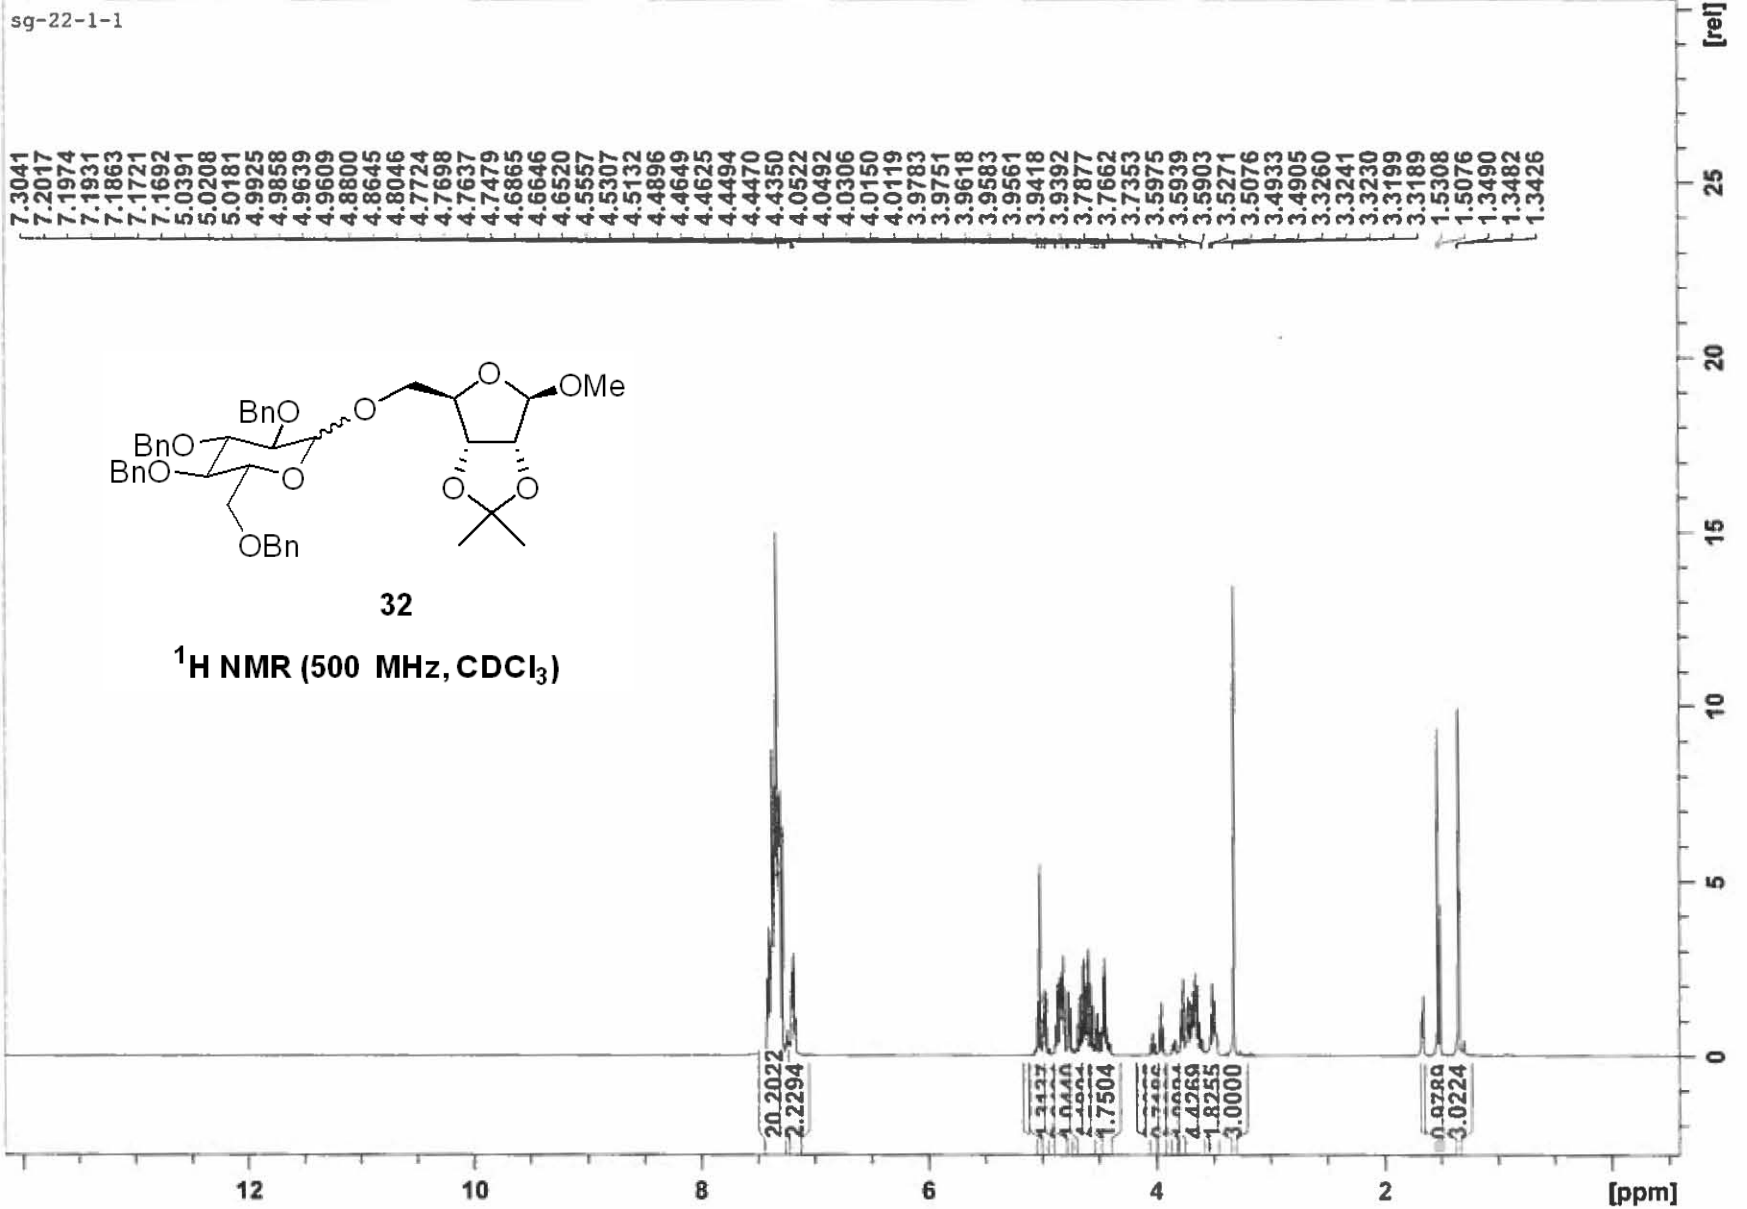



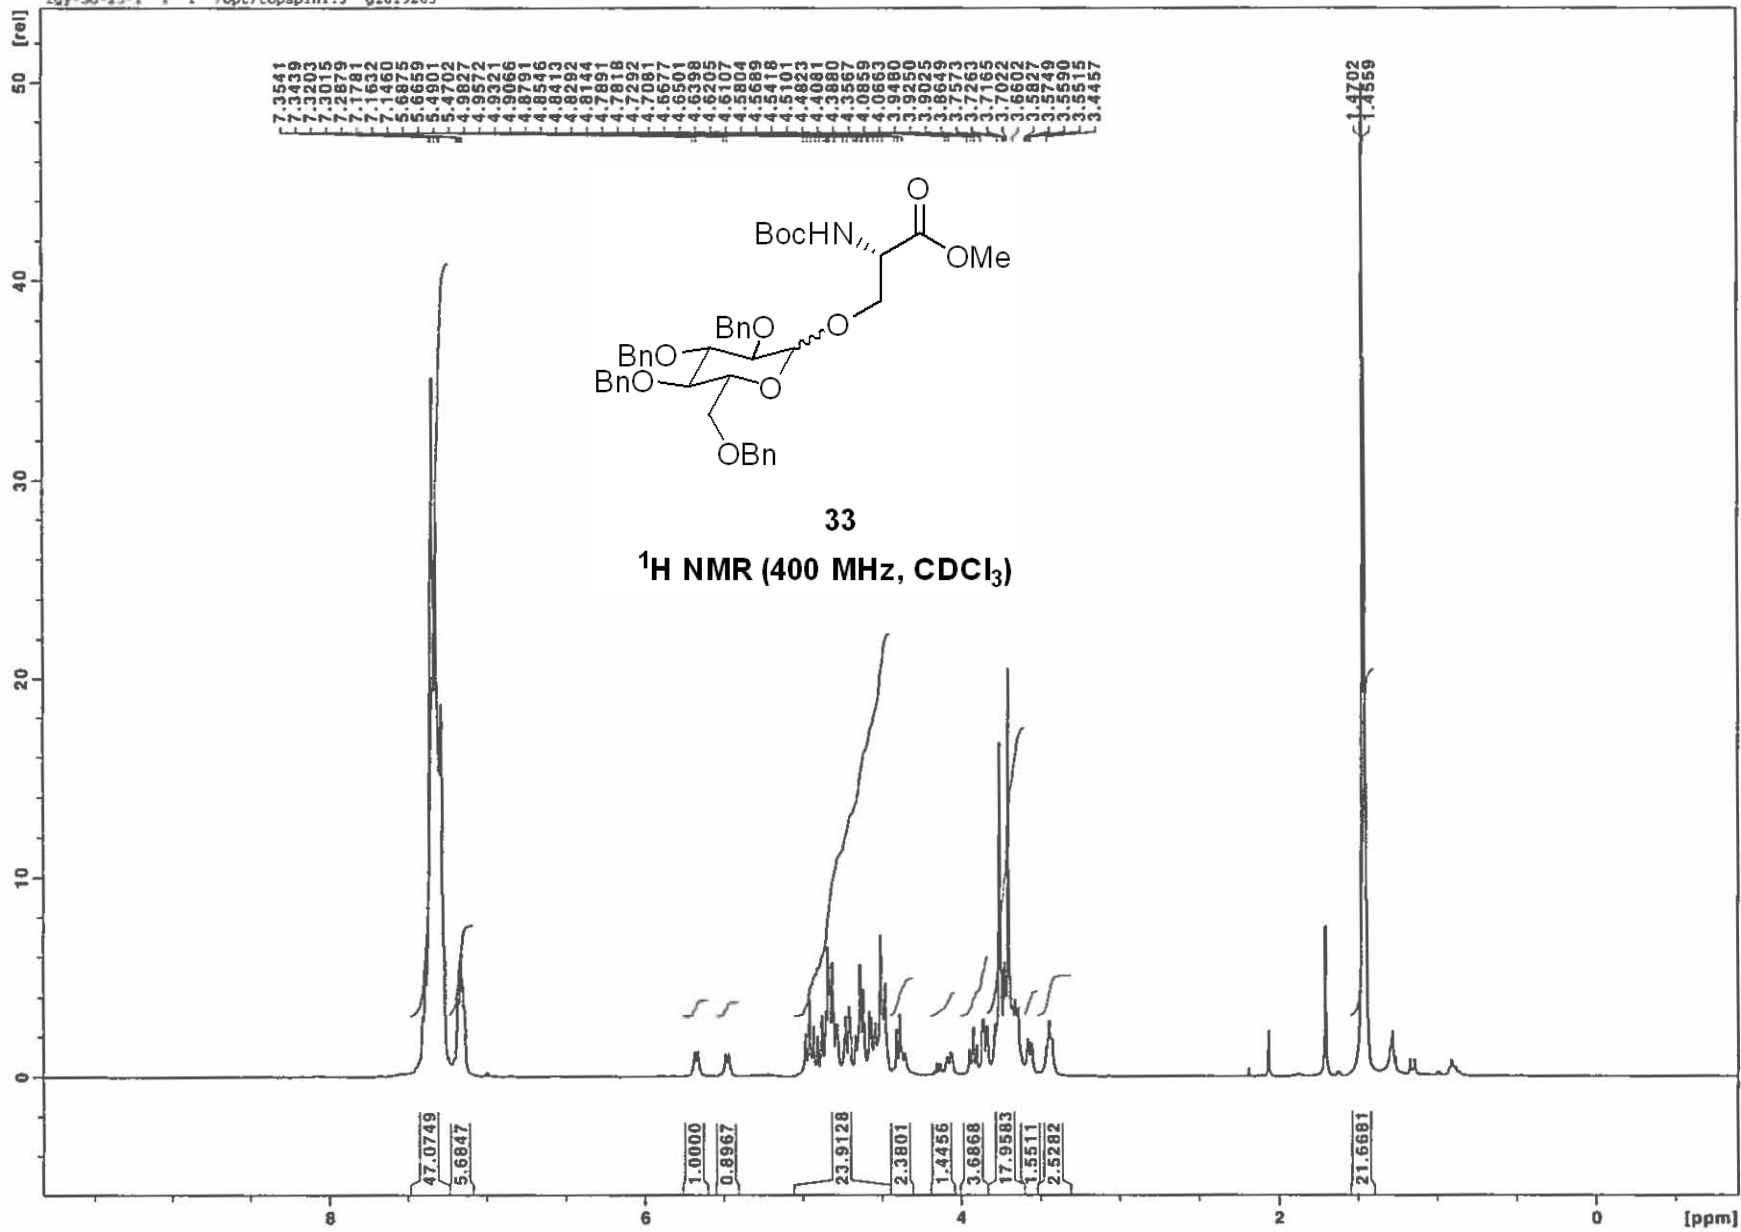

sgc-25 1 1 J:\gz619263

sgc-25

170.8990  
170.7699  
155.5818  
155.4683  
138.8148  
138.5844  
138.3728  
138.2536  
138.2161  
138.1014  
137.9026  
128.5455  
128.4576  
128.4023  
128.3879  
128.2298  
128.1780  
128.0986  
127.9617  
127.9398  
127.8289  
127.7946  
127.7431  
127.7313  
127.6923  
127.6128  
127.5923  
103.9092  
98.4376  
84.5922  
81.9241  
81.7457  
80.0692  
79.9612  
75.6383  
75.1507  
75.0091  
74.9774  
73.5756  
73.5542  
72.9597  
70.8155  
69.8902  
69.8389  
68.6492  
68.3427  
54.1323  
54.0764  
52.5446  
52.4734

- 28.3517

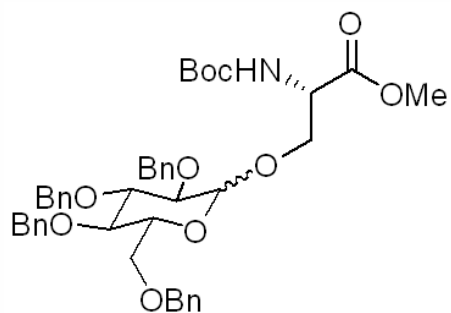

33

<sup>13</sup>C NMR (125 MHz, CDCl<sub>3</sub>)

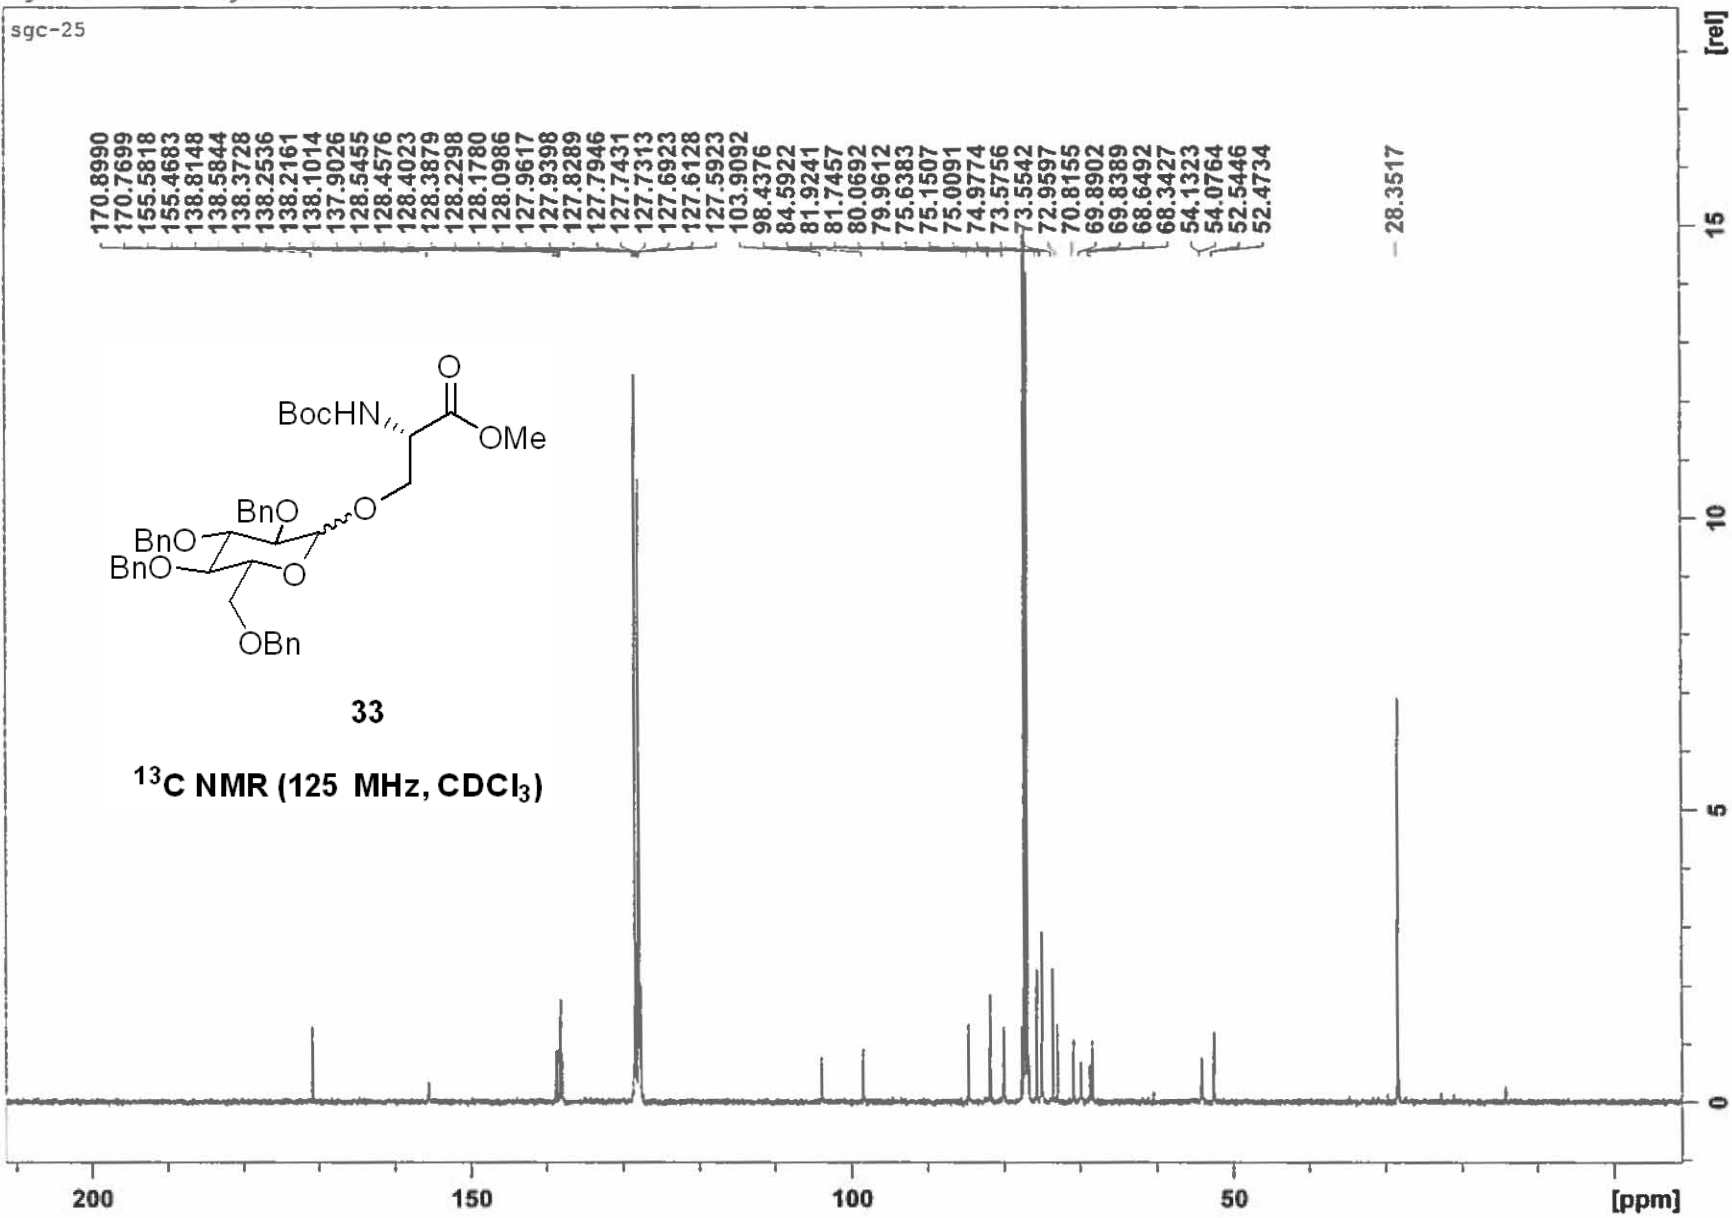

sgy-80-23-1 1 1 /opt/topspin1.3 gz619263

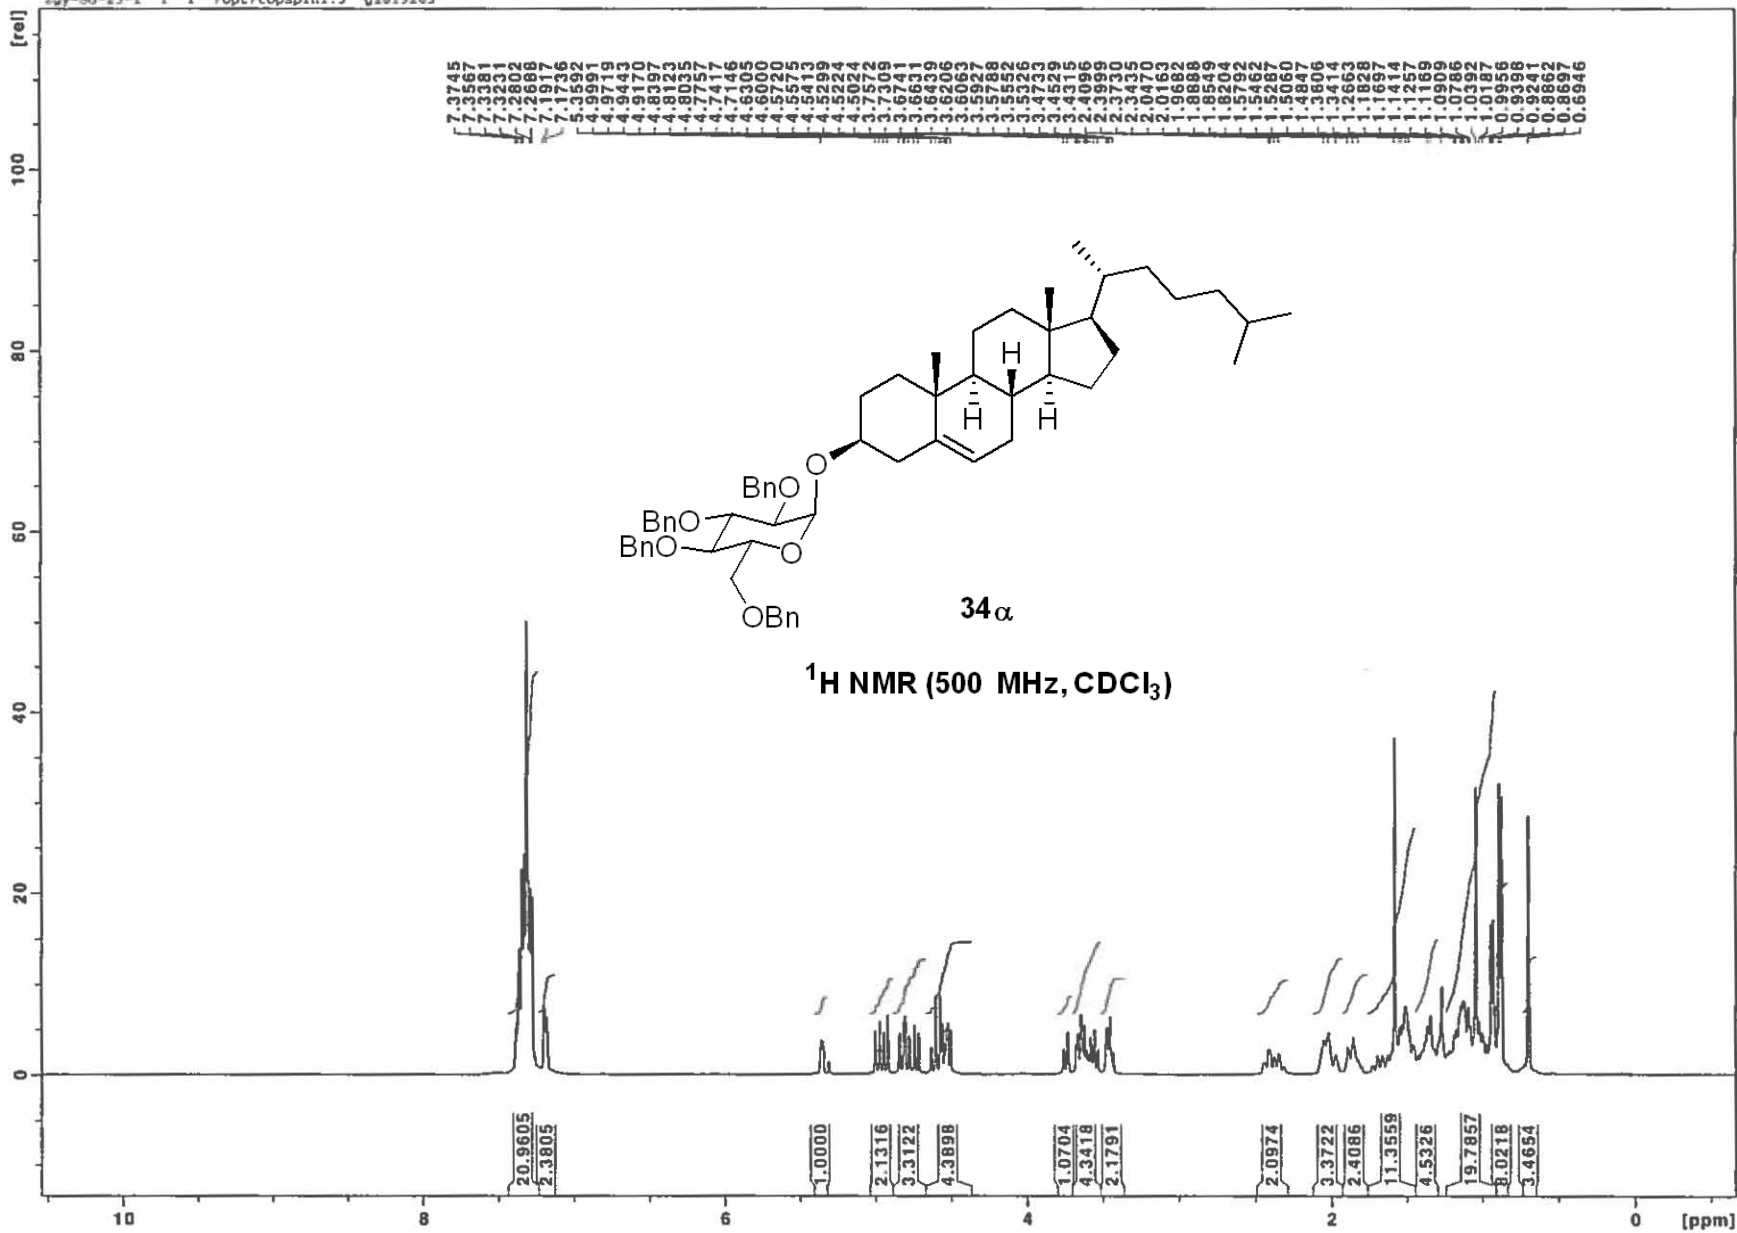

zgy-sg-23-1 1 1 J:\gz619263

zgy-sg-23-1

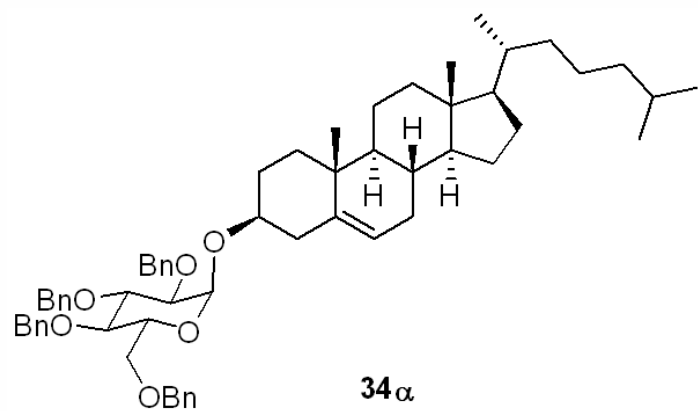

$^{13}\text{C}$  NMR (125 MHz,  $\text{CDCl}_3$ )

140.6303  
138.7065  
138.5713  
138.3532  
138.1875  
128.3726  
128.3508  
128.3223  
128.2435  
127.9823  
127.8888  
127.7227  
127.6801  
127.6570  
127.5609  
127.5216  
121.9245  
102.2628  
84.8651  
82.3954  
79.7129  
78.0480  
76.5975  
75.6750  
74.9742  
74.9264  
74.8329  
73.4096  
69.2194  
56.7876  
56.1894  
50.2263  
42.3542  
39.8193  
39.5384  
39.1340  
37.3409  
36.7774  
36.2145  
35.7964  
31.9732  
31.9220  
29.9931  
28.2417  
28.0251  
24.3065  
23.8362  
22.8172  
22.5656  
21.0914  
19.4235  
18.7397  
11.8753

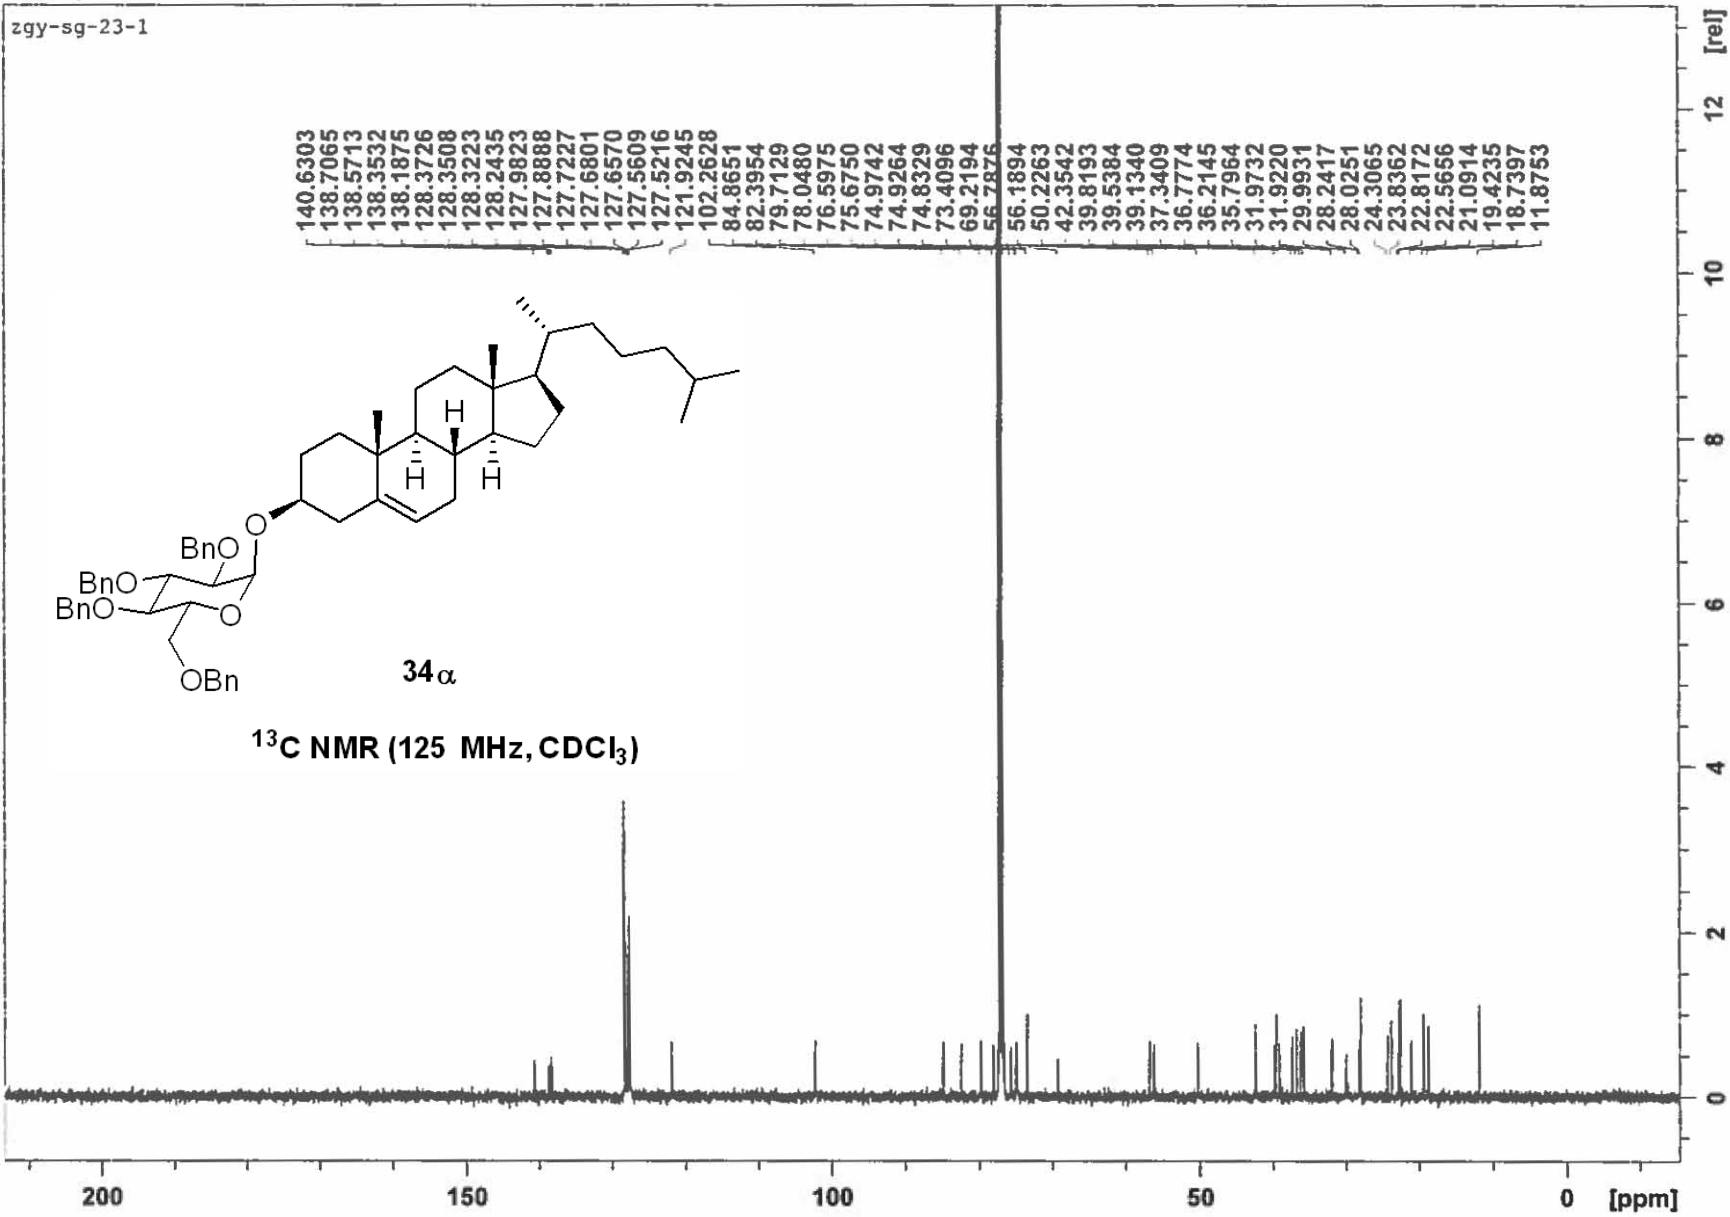



sg-23-2

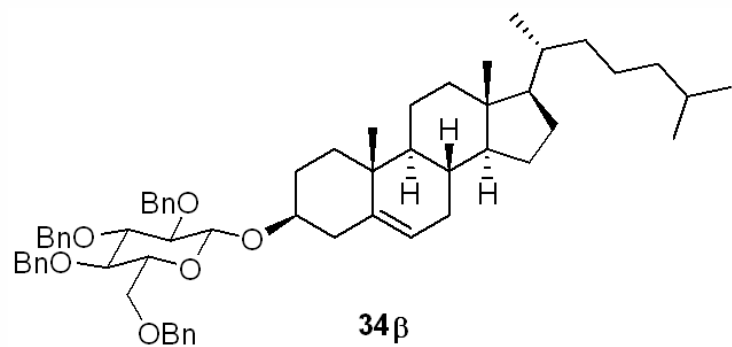

<sup>1</sup>H NMR (500 MHz, CDCl<sub>3</sub>)

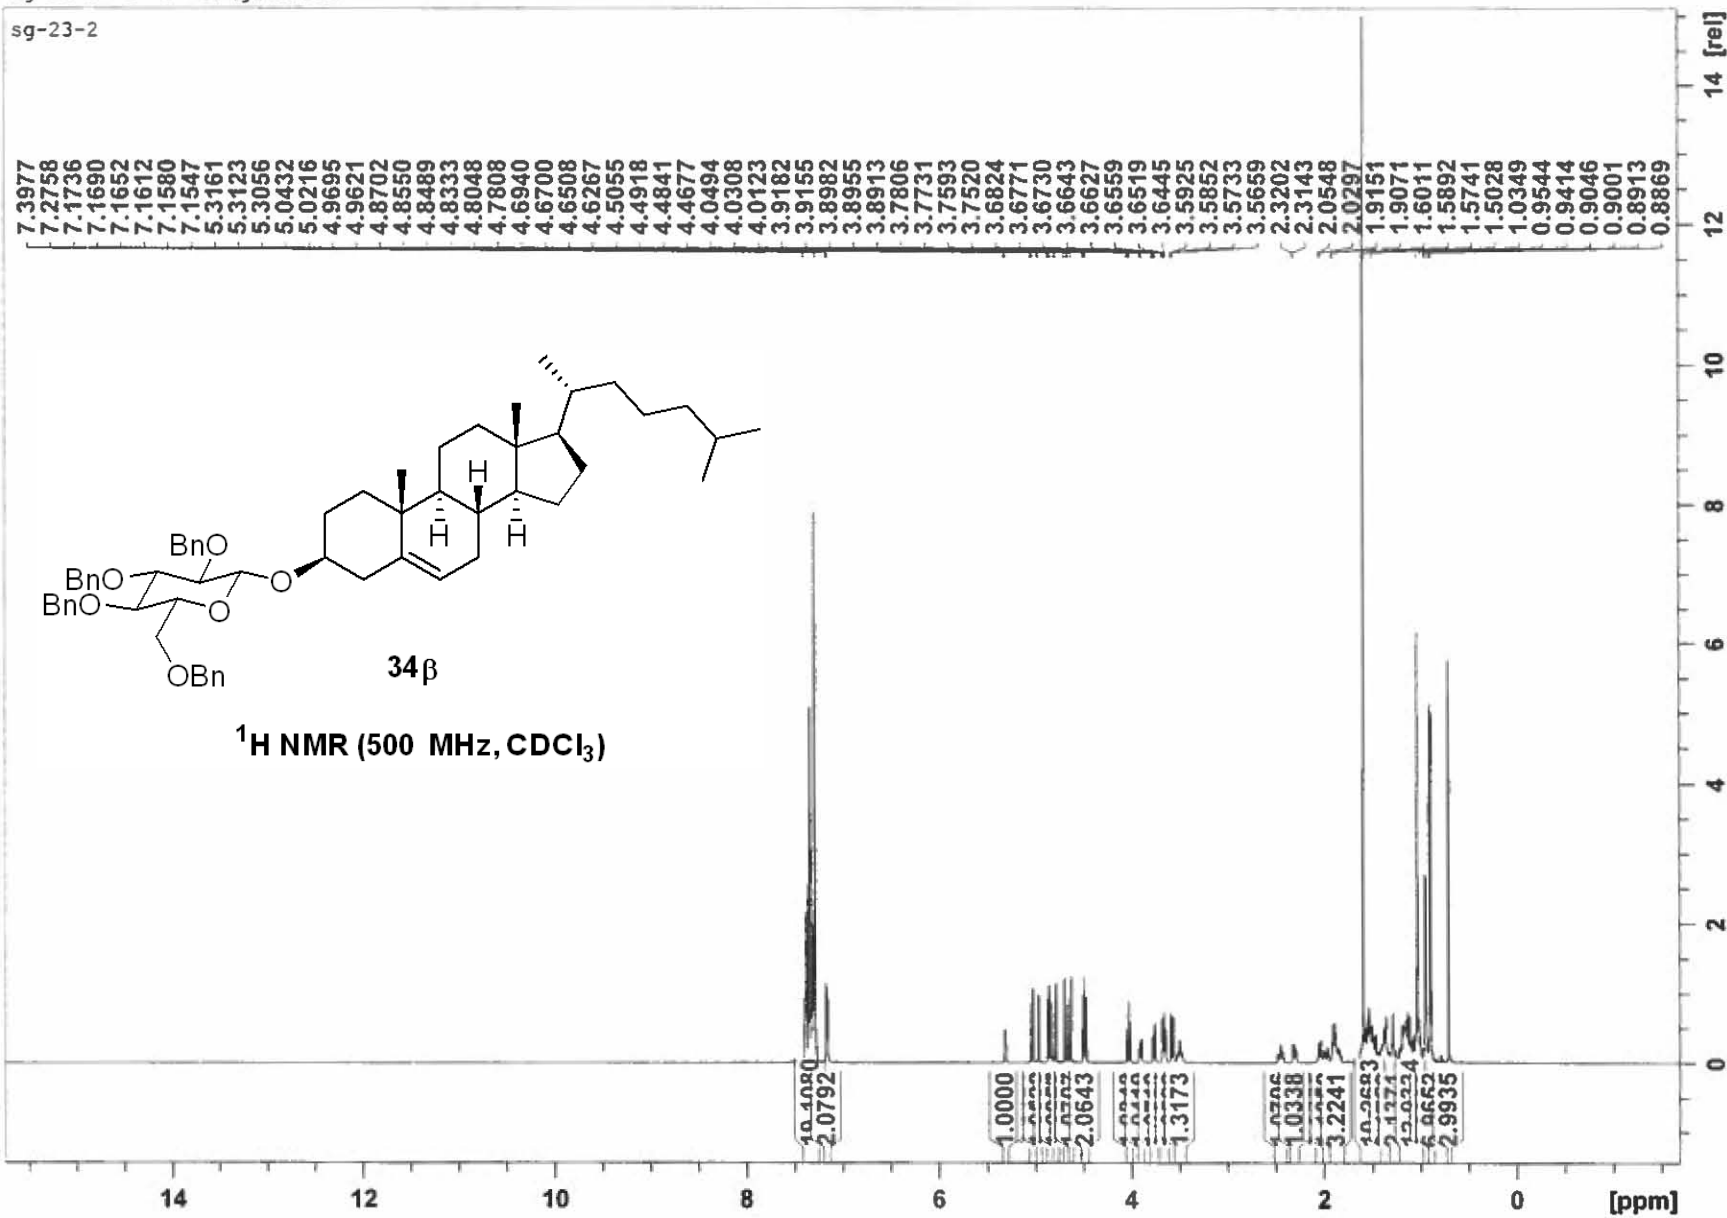

sgc-23-2-1 1 1 J:\gz619263

sgc-23-2-1

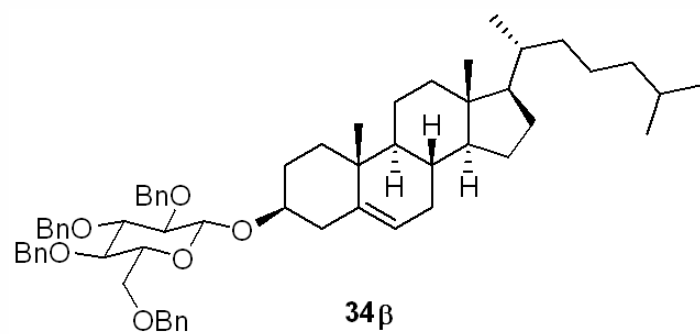

$^{13}\text{C}$  NMR (100 MHz,  $\text{CDCl}_3$ )

140.8745  
139.0259  
138.3179  
138.0403  
128.4240  
128.3759  
128.3372  
128.1416  
127.9762  
127.9126  
127.8457  
127.6948  
127.6296  
127.5195  
121.7218  
94.6859  
82.1496  
80.0036  
77.9561  
75.6696  
75.1230  
73.4536  
73.0645  
70.1080  
68.6867  
56.8143  
56.2058  
50.1672  
42.3596  
39.9198  
39.8200  
39.5470  
37.1456  
36.8120  
36.2229  
35.7987  
31.9597  
31.9229  
28.2426  
28.0291  
27.5416  
24.3122  
23.8491  
22.8239  
22.5715  
21.0895  
19.4016  
18.7445  
11.8750

[rel]

20

15

10

5

0

200

150

100

50

0 [ppm]

sg-28-1 1 1 J:\gz619263

sg-28-1

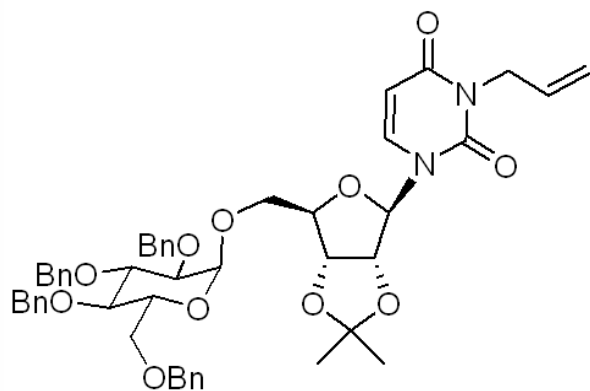

35 $\alpha$

$^1\text{H NMR}$  (500 MHz,  $\text{CDCl}_3$ )

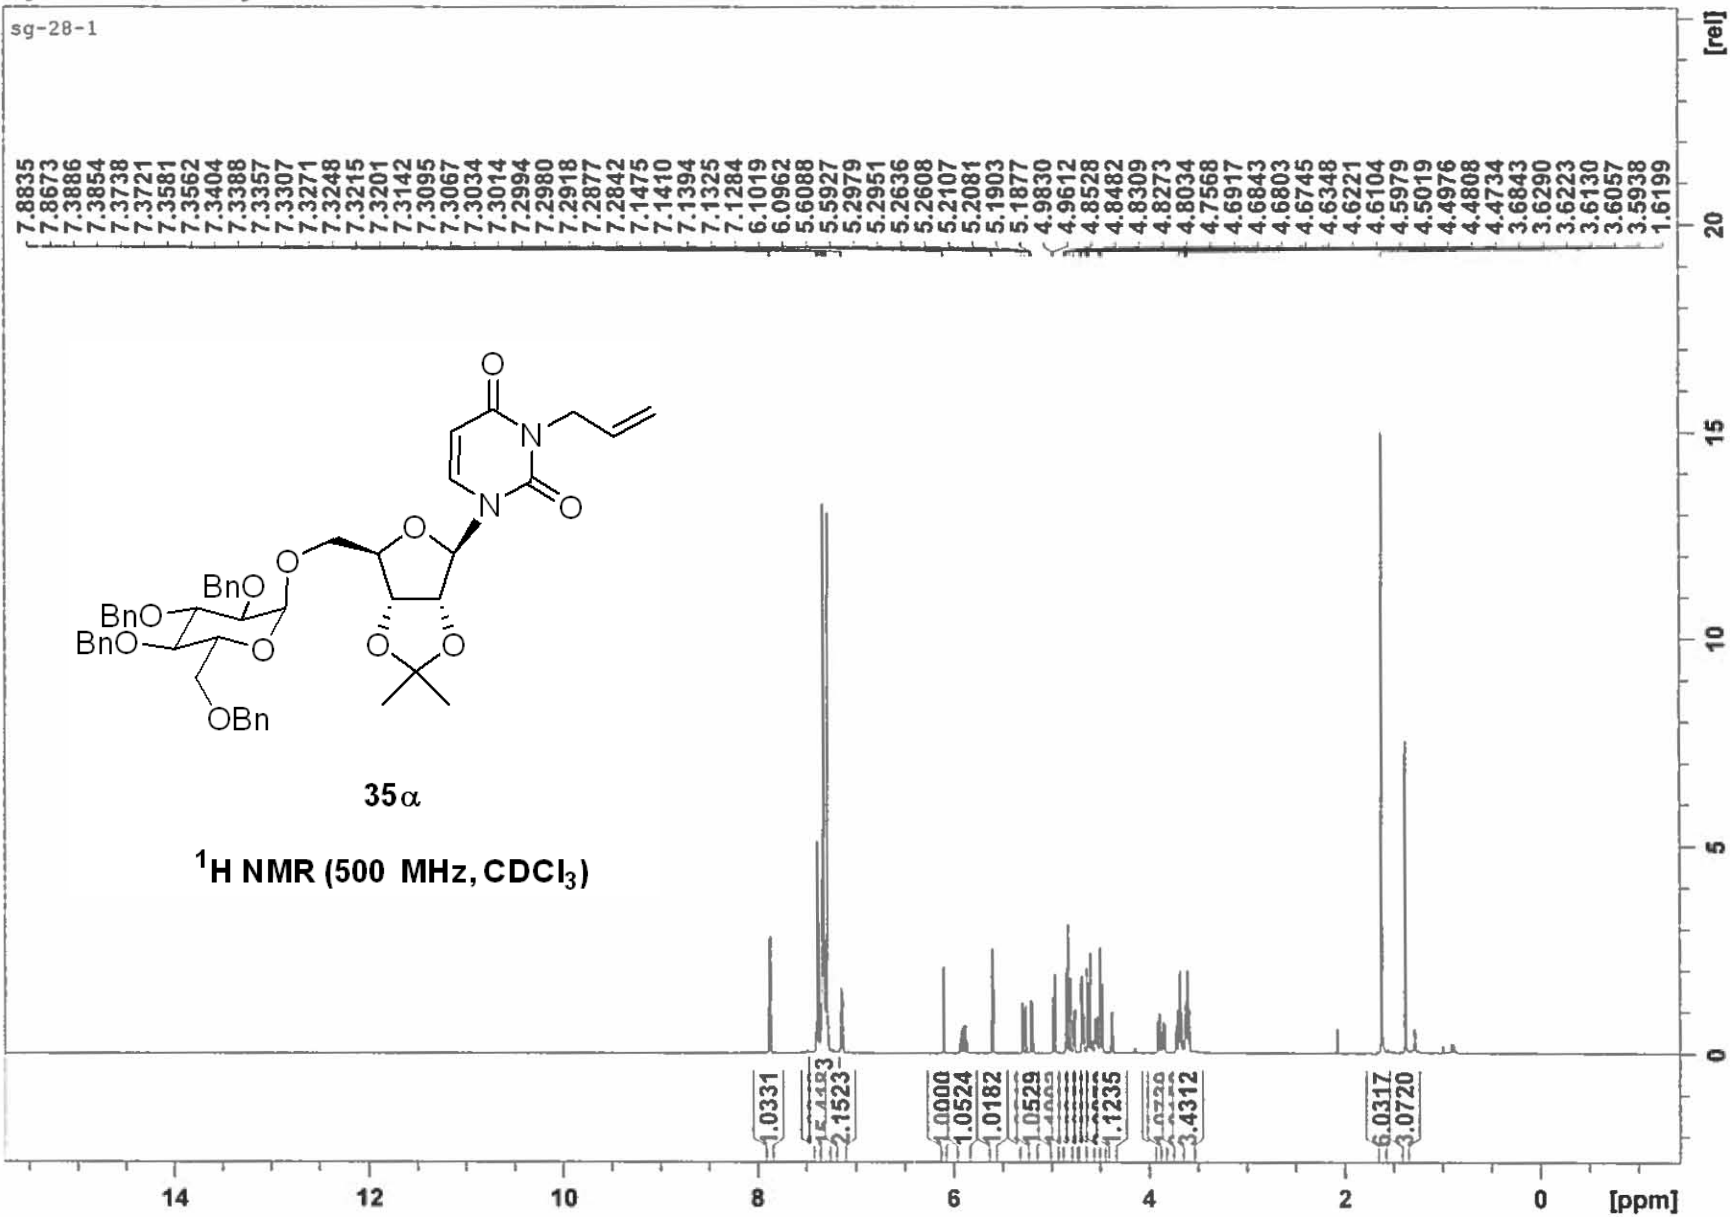

sgc-28-1 1 1 J:\gz619263

sgc-28-1

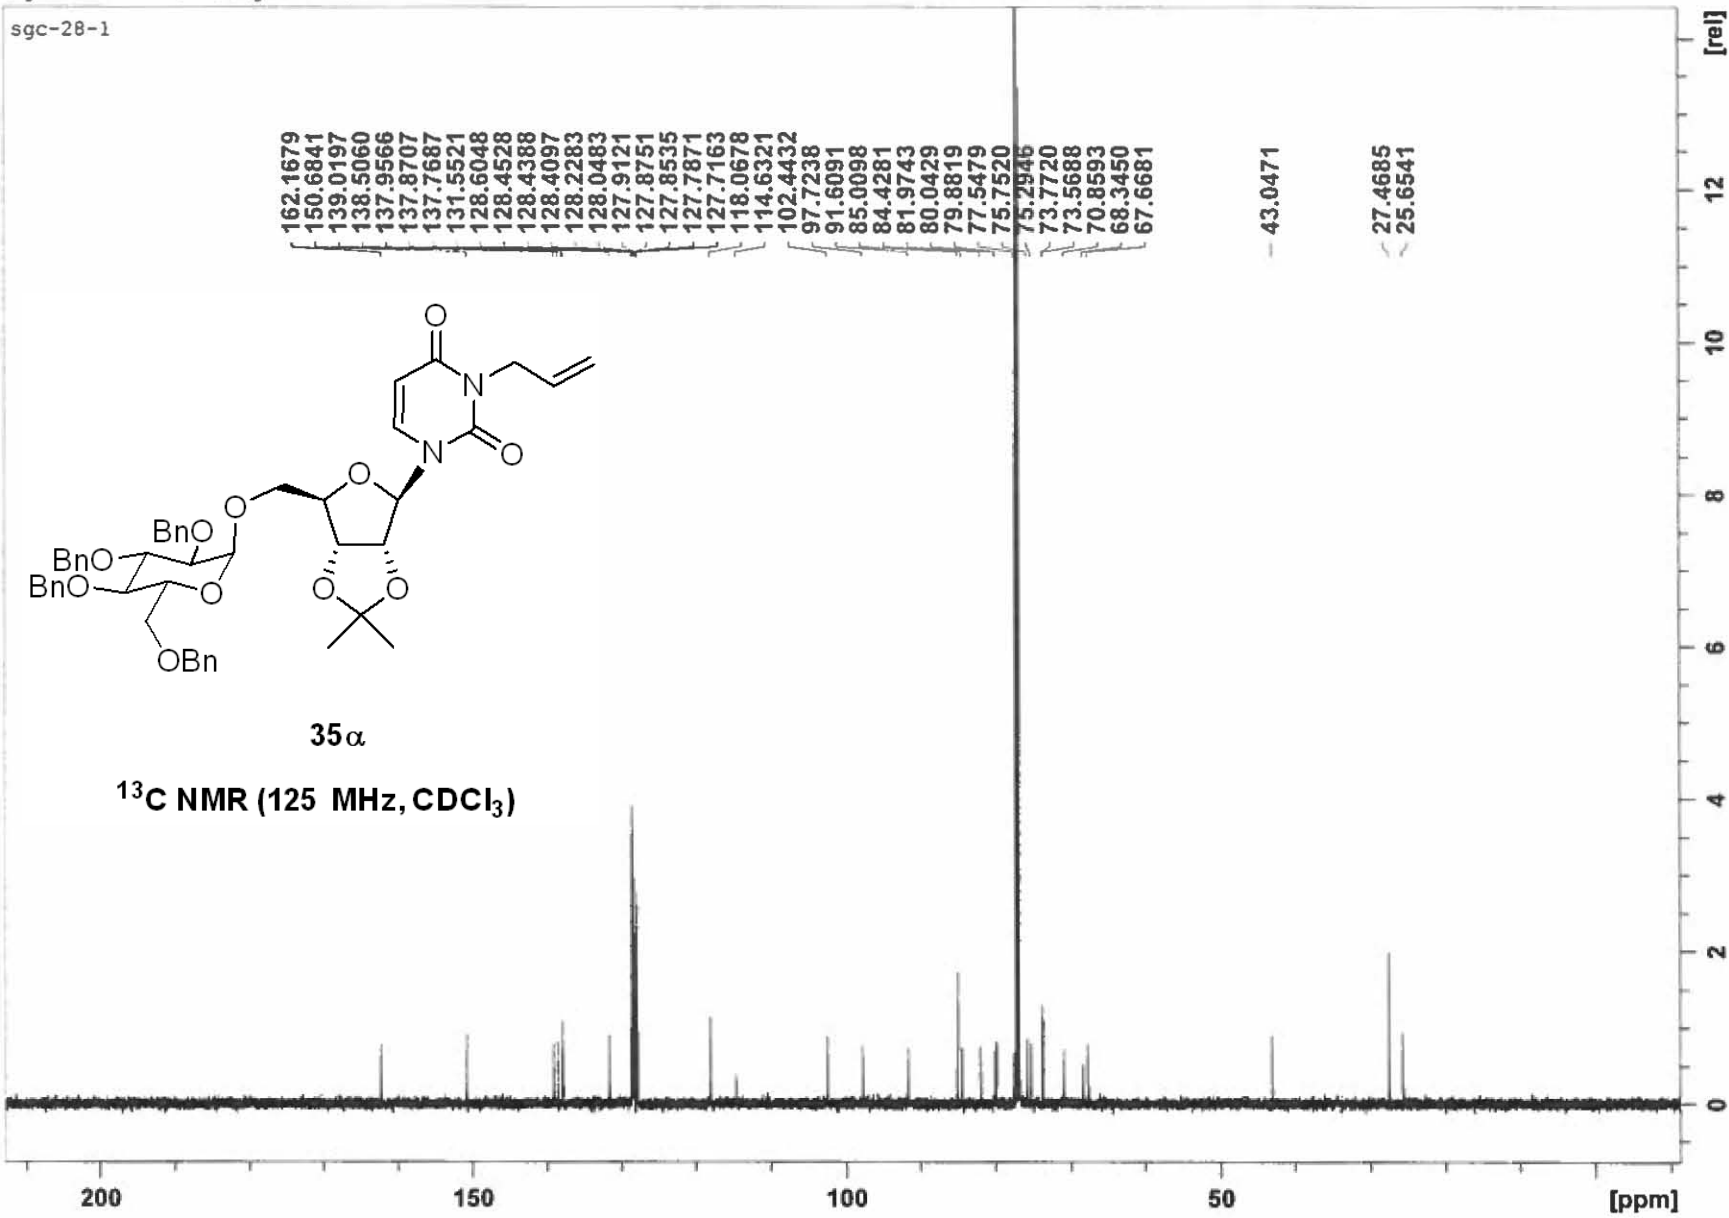

sg-28-2

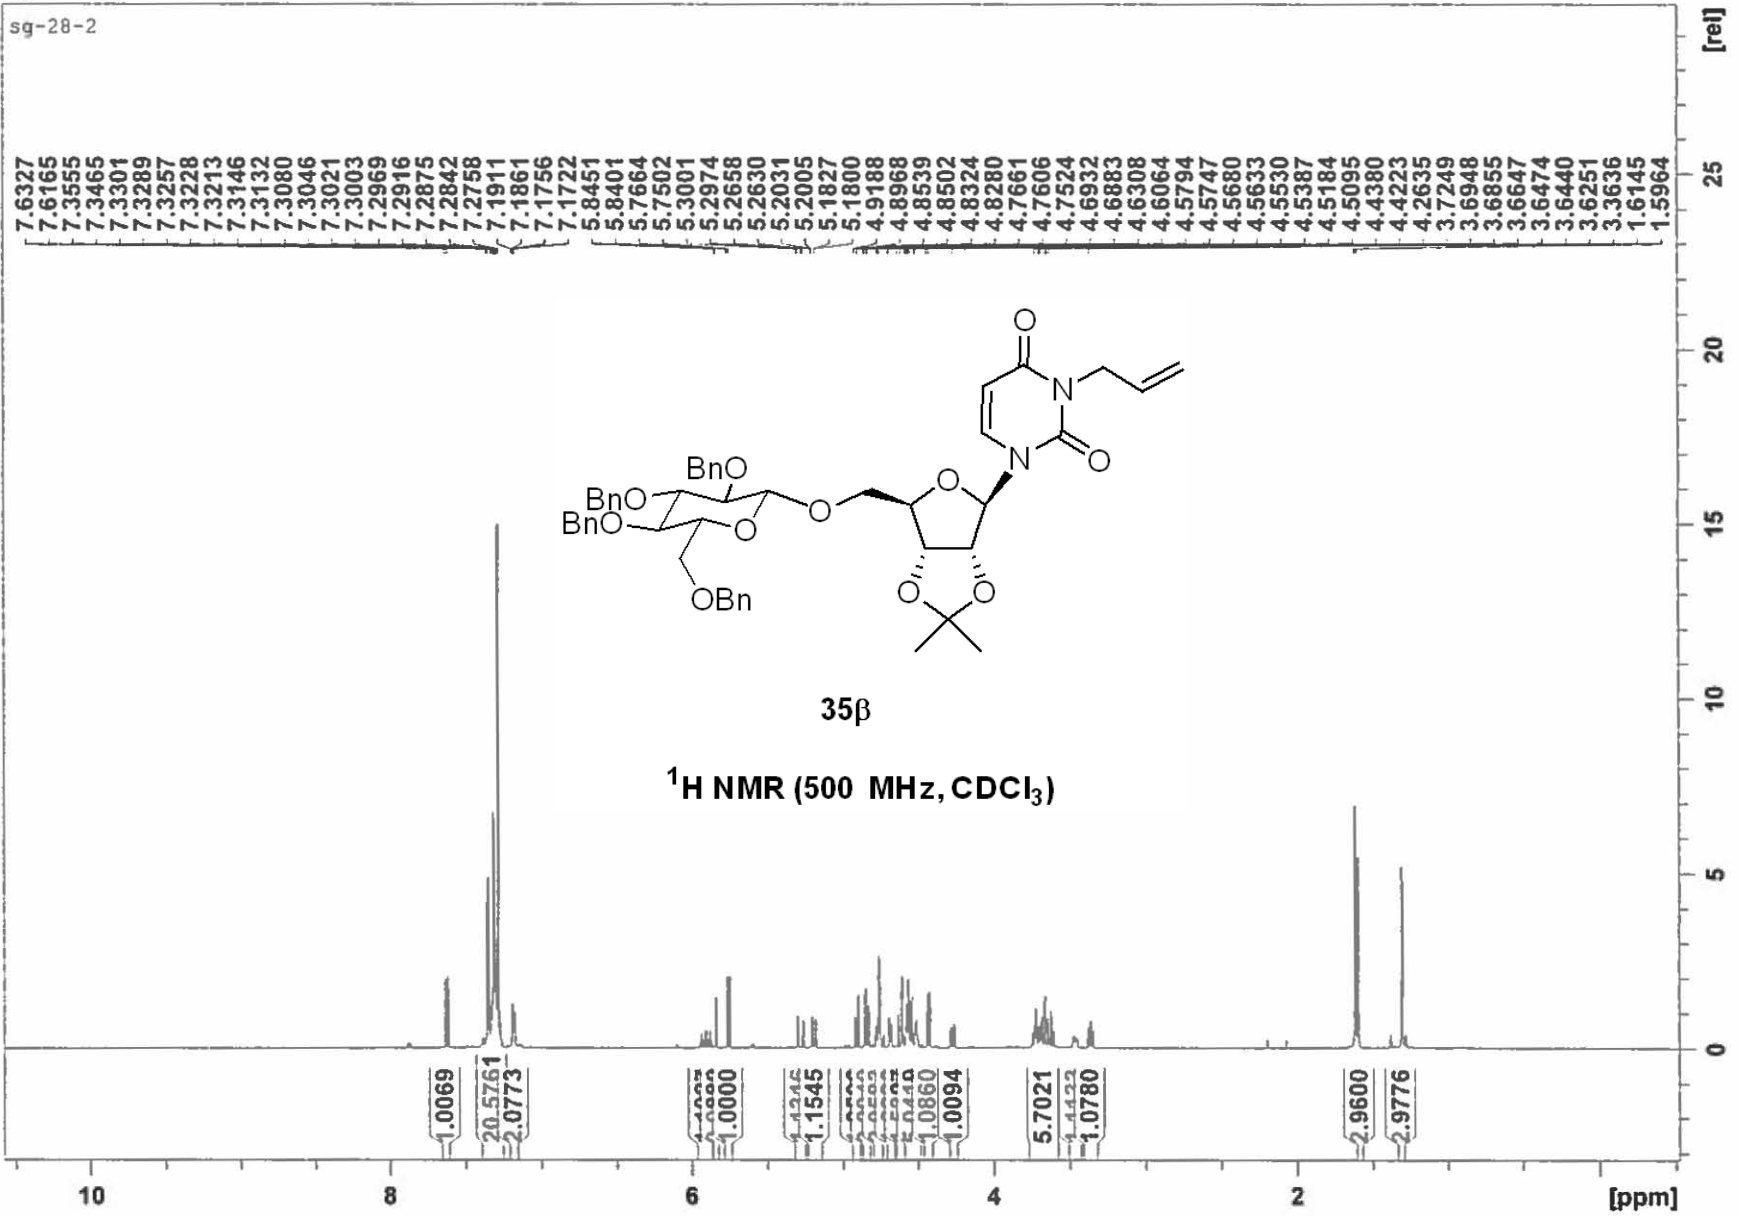

sgc-28-2

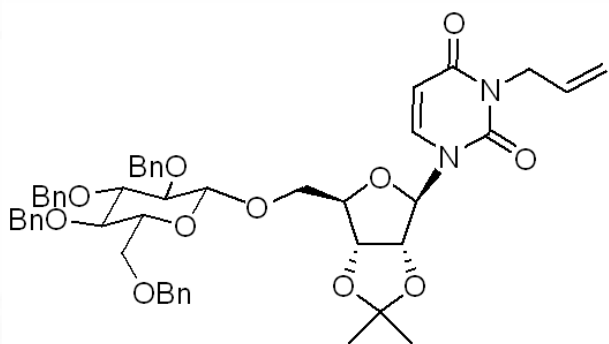

35β

<sup>13</sup>C NMR (125 MHz, CDCl<sub>3</sub>)

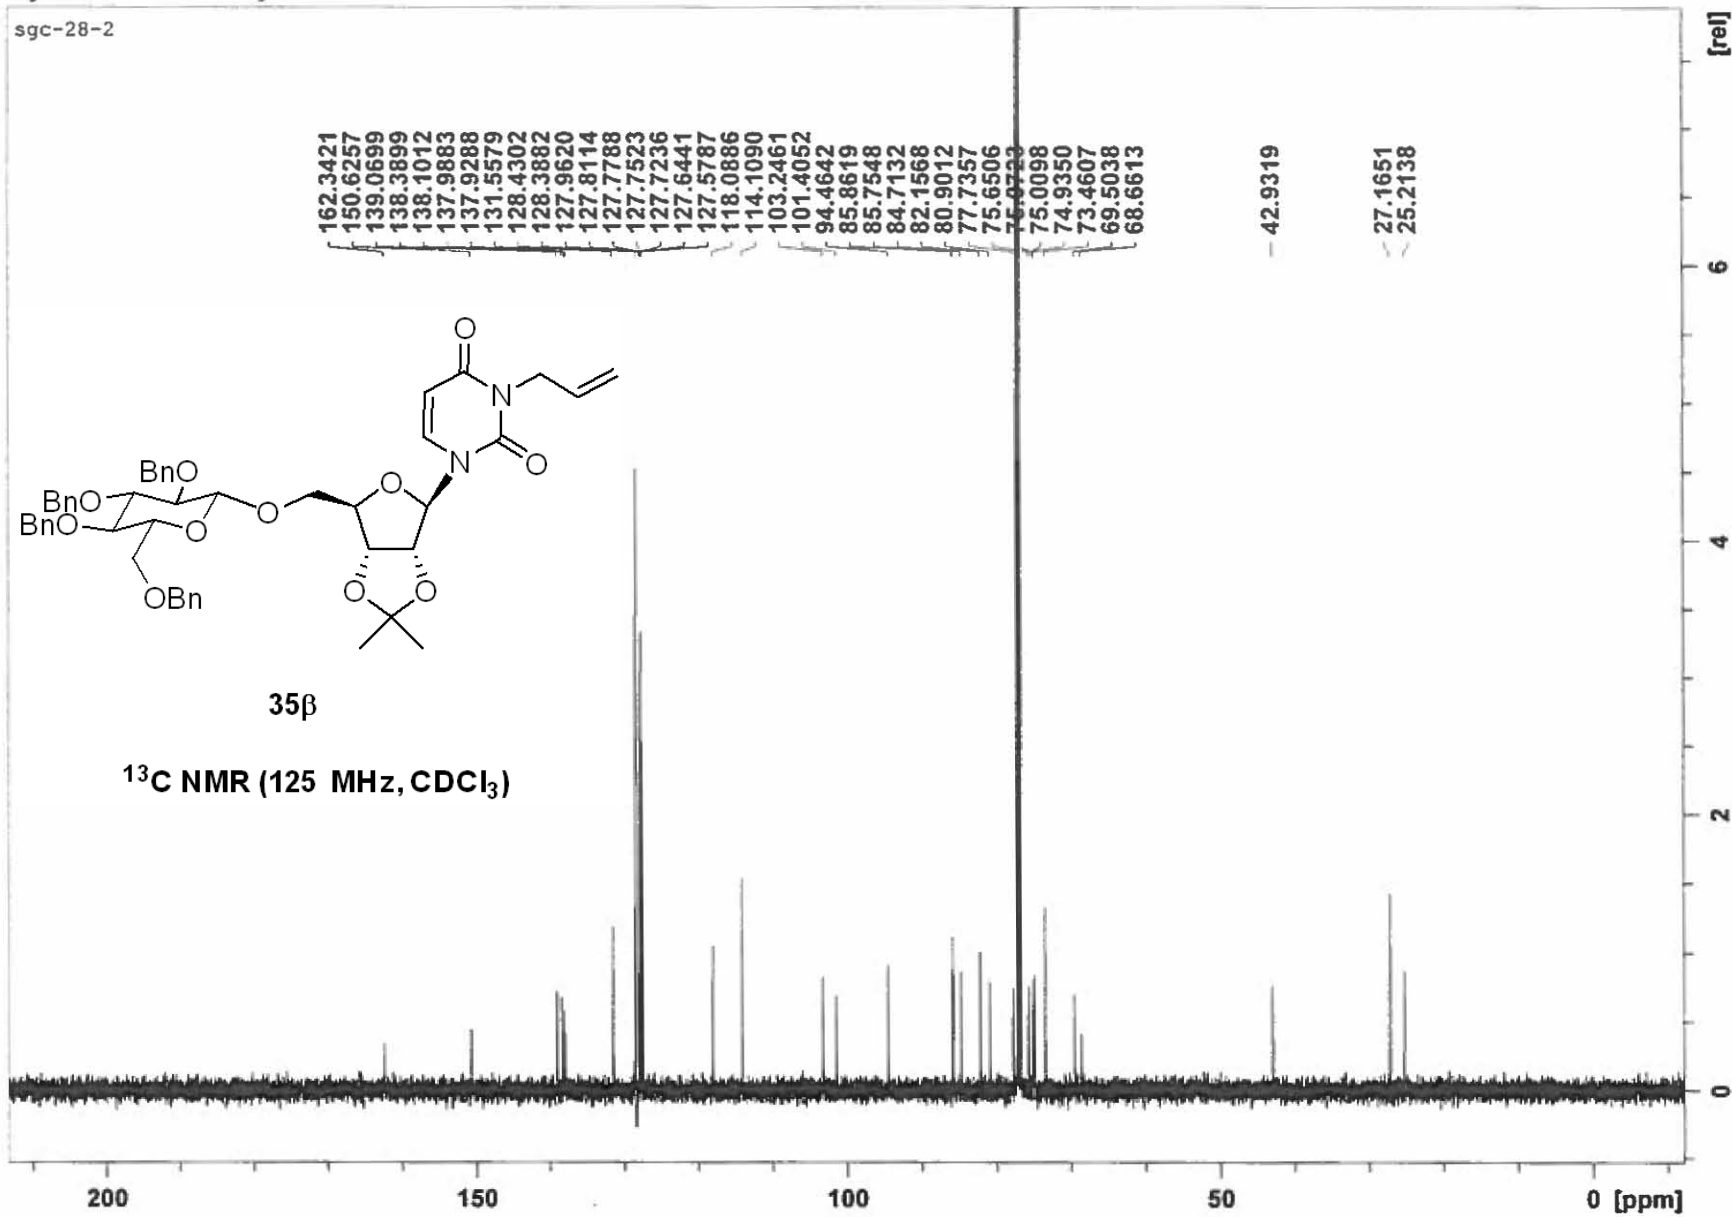

sg-32-1-1 1 1 J:\gz619263

sg-32-1-1

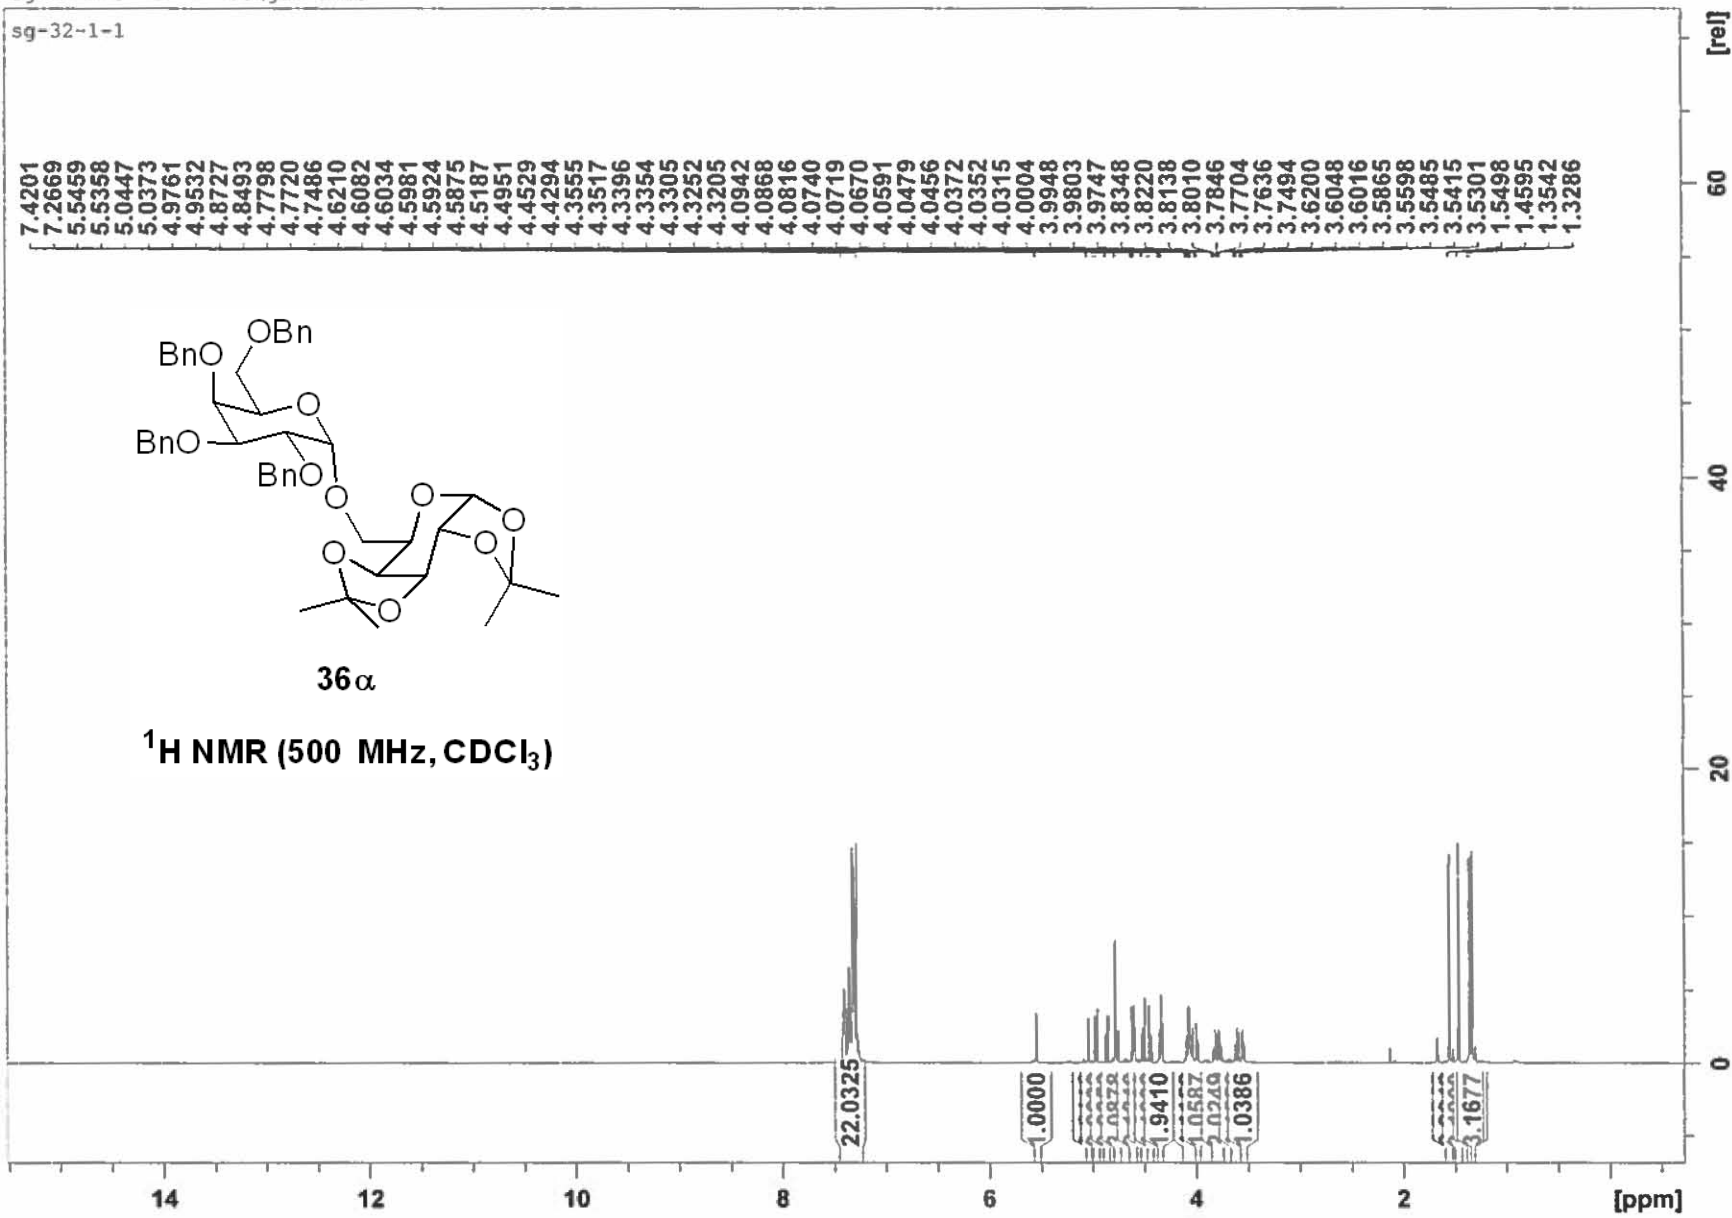

sgc-32-1 1 1 J:\gz619263

sgc-32-1

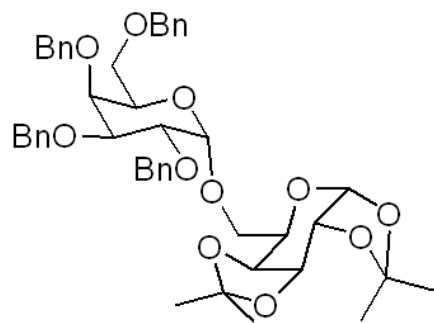

36 $\alpha$

$^{13}\text{C}$  NMR (125 MHz,  $\text{CDCl}_3$ )

138.9689  
138.7914  
138.1216  
128.3867  
128.3118  
128.2441  
128.1933  
127.8242  
127.7439  
127.6628  
127.4729  
127.4348  
127.3942  
109.1987  
108.5226

97.5955  
96.3487  
79.0085  
75.0218  
74.7901  
73.4027  
73.0718  
72.6808  
70.9155  
70.6995  
69.1932  
68.7154  
66.3675  
65.8613

26.1696  
26.0605  
24.9528  
24.6160

[rel]

20

15

10

5

0

200

150

100

50

[ppm]



sg-32-2-1

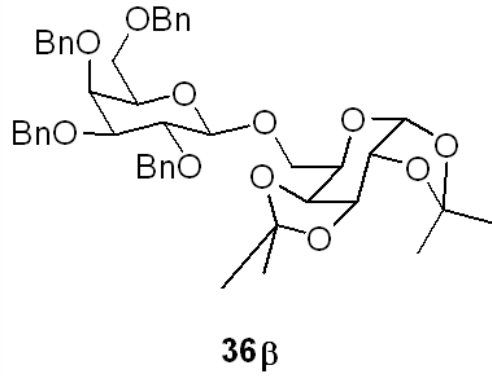

**<sup>1</sup>H NMR (500 MHz, CDCl<sub>3</sub>)**

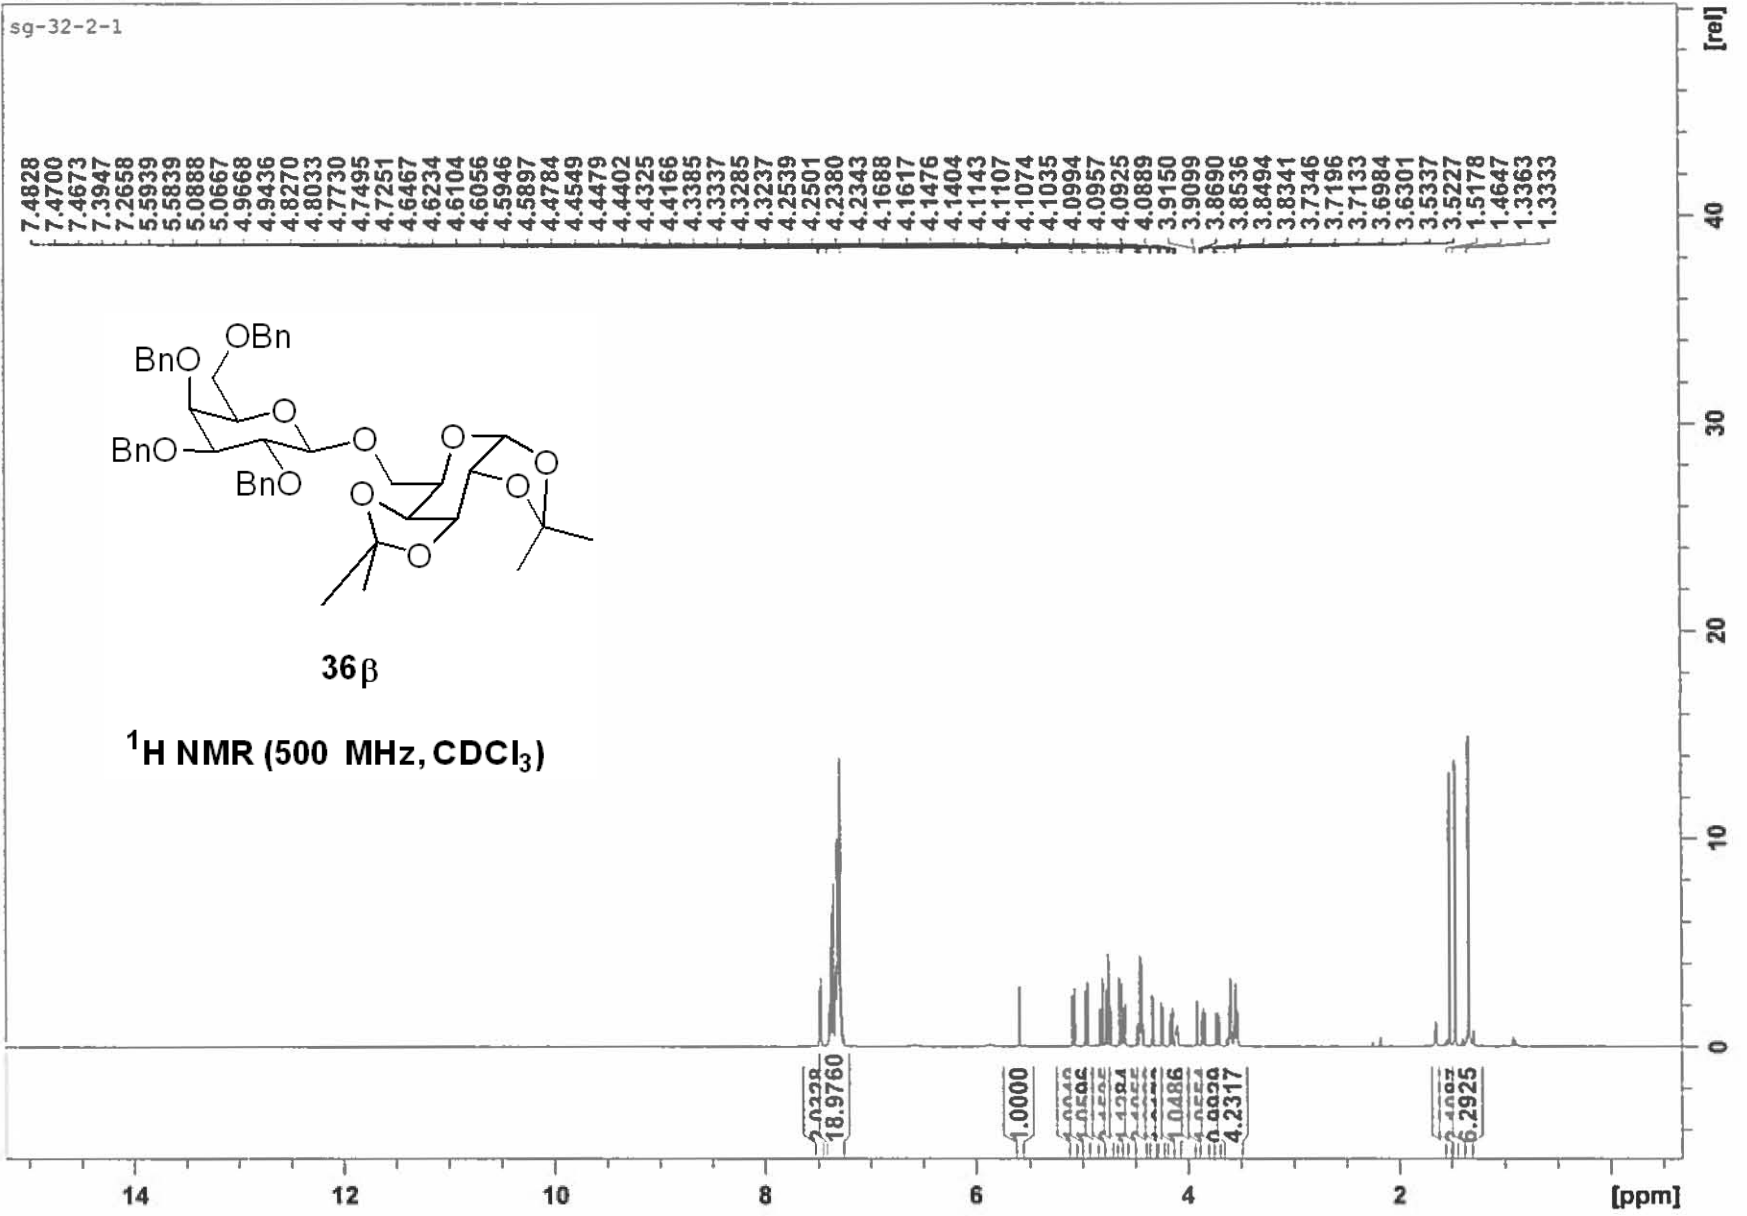

sgc-32-2 1 1 J:\gz619263

sgc-32-2

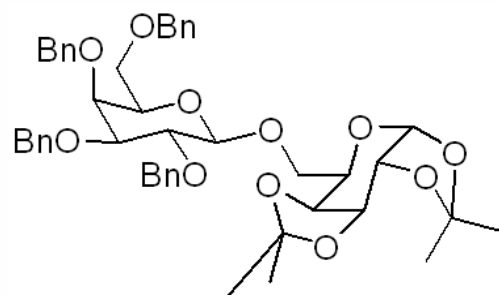

36 $\beta$

$^{13}\text{C}$  NMR (125 MHz,  $\text{CDCl}_3$ )

139.0712  
138.7147  
138.6863  
137.9752  
128.5834  
128.4169  
128.3668  
128.3158  
128.1291  
128.1069  
127.8901  
127.7599  
127.5140  
127.4783  
127.3126  
109.3278  
108.5839  
104.7196  
96.3949  
82.0042  
79.1465  
74.7681  
74.5552  
73.6937  
73.5333  
73.3438  
73.1632  
71.4893  
70.8172  
70.5584  
69.6284  
68.7079  
67.4281

26.0455  
26.0023  
25.0644  
24.4526

[rel]

20

15

10

5

0

200

150

100

50

0 [ppm]

sg-35-1 1 1 J:\gz619263

sg-35-1

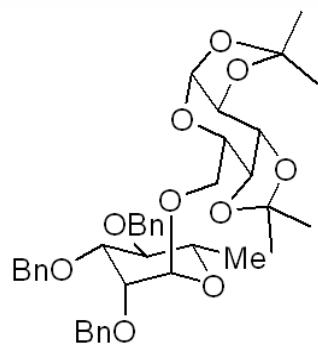

37 $\alpha$

$^1\text{H NMR}$  (500 MHz,  $\text{CDCl}_3$ )

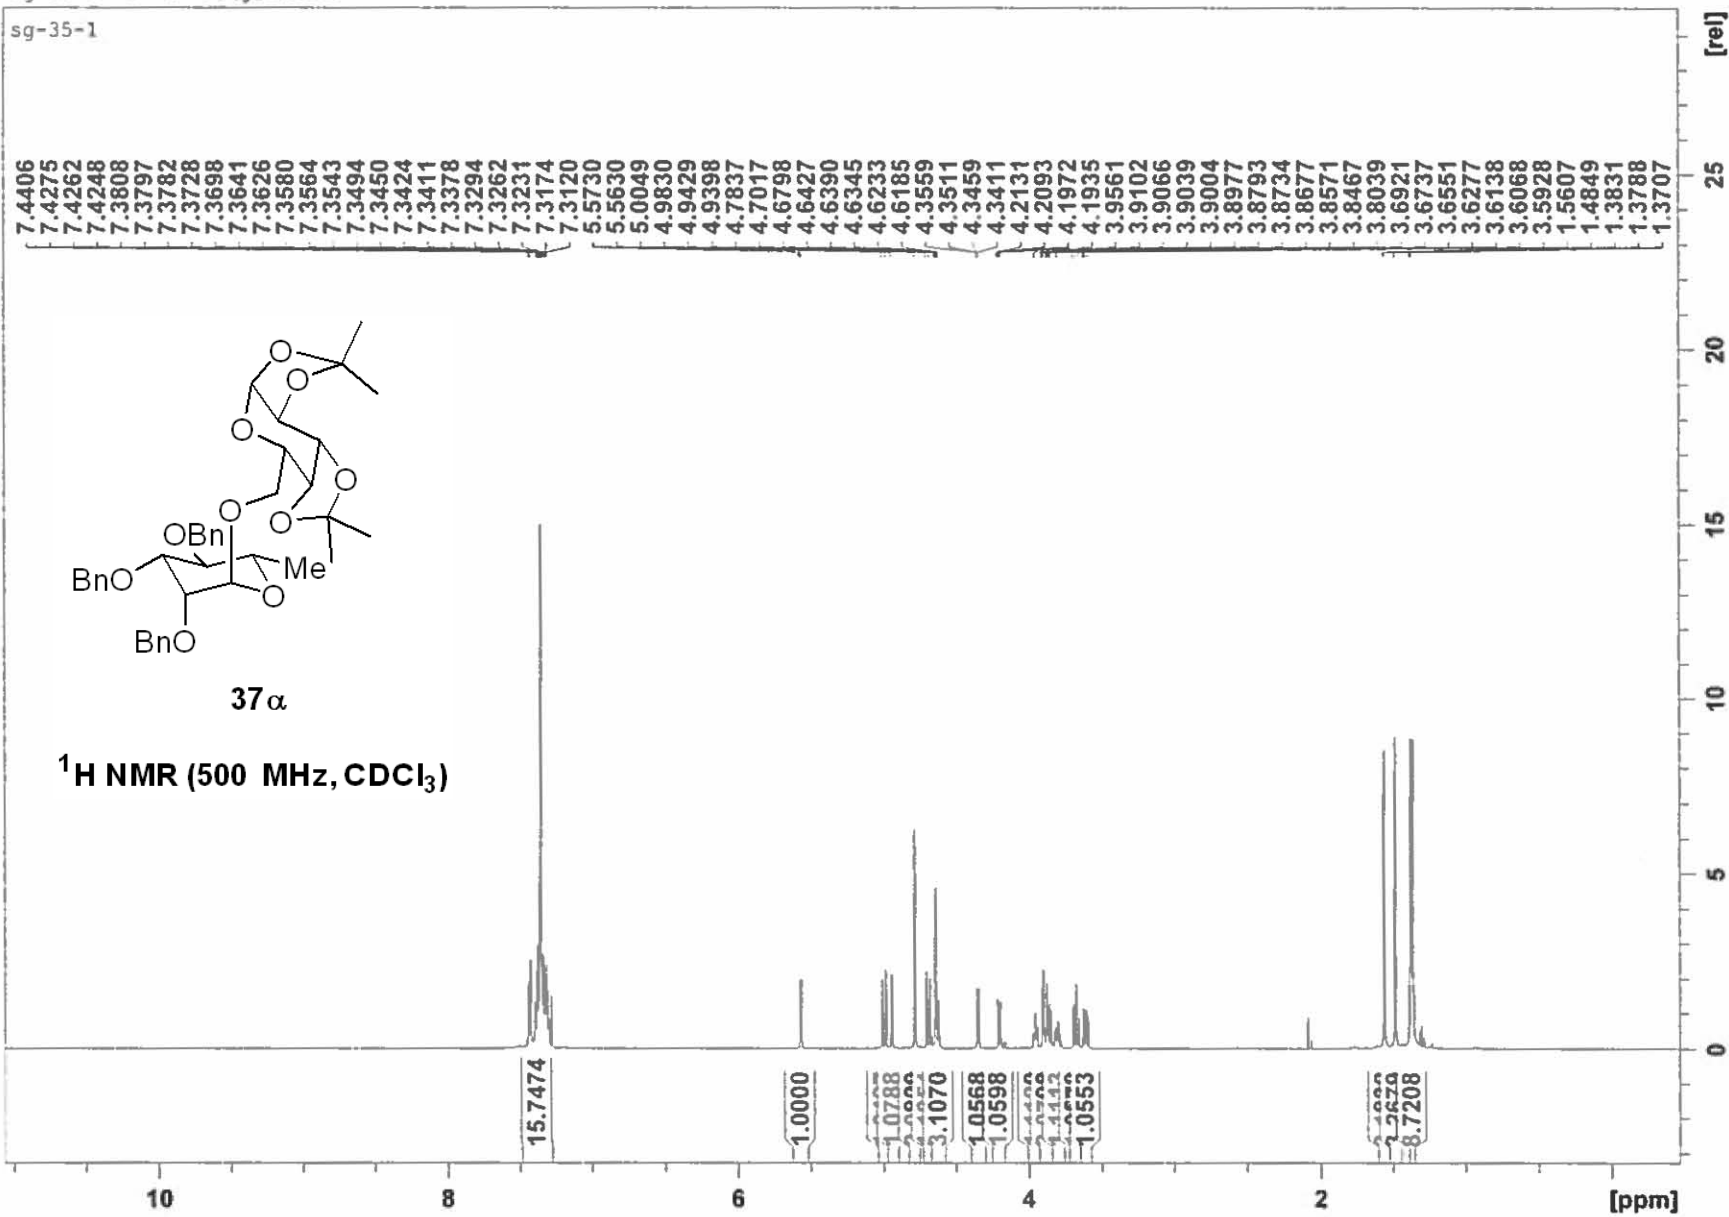





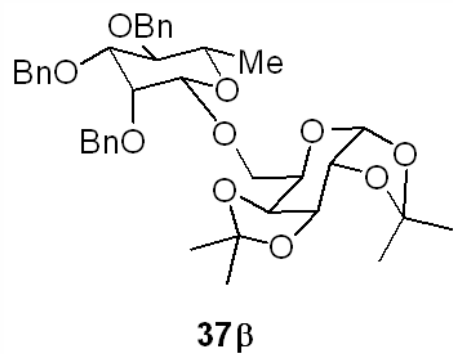

<sup>13</sup>C NMR (125 MHz, CDCl<sub>3</sub>)

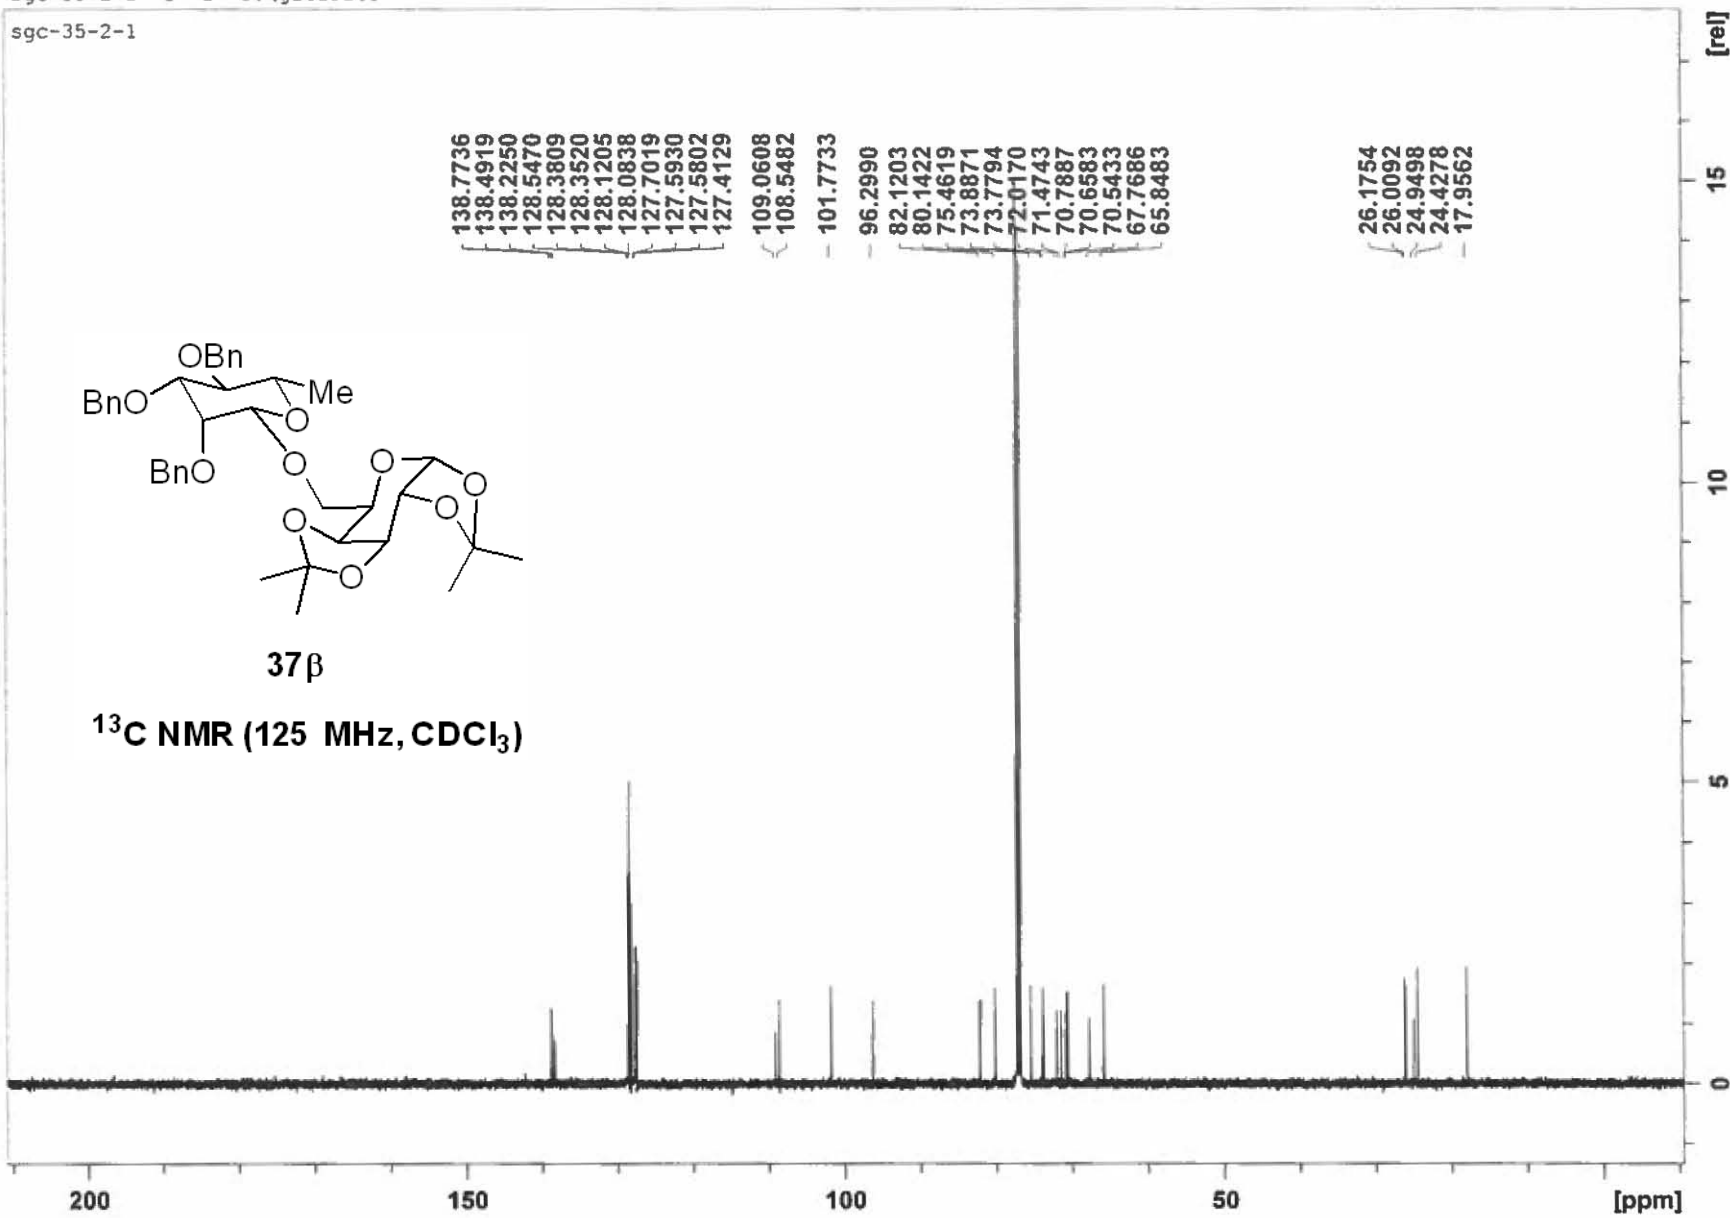

sg-36-1

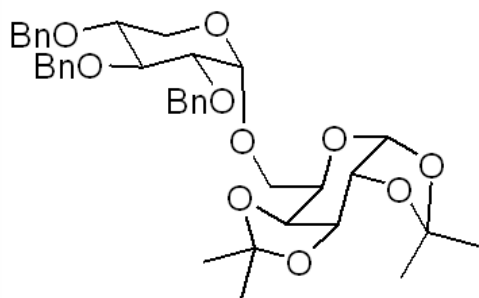

38α

<sup>1</sup>H NMR (500 MHz, CDCl<sub>3</sub>)

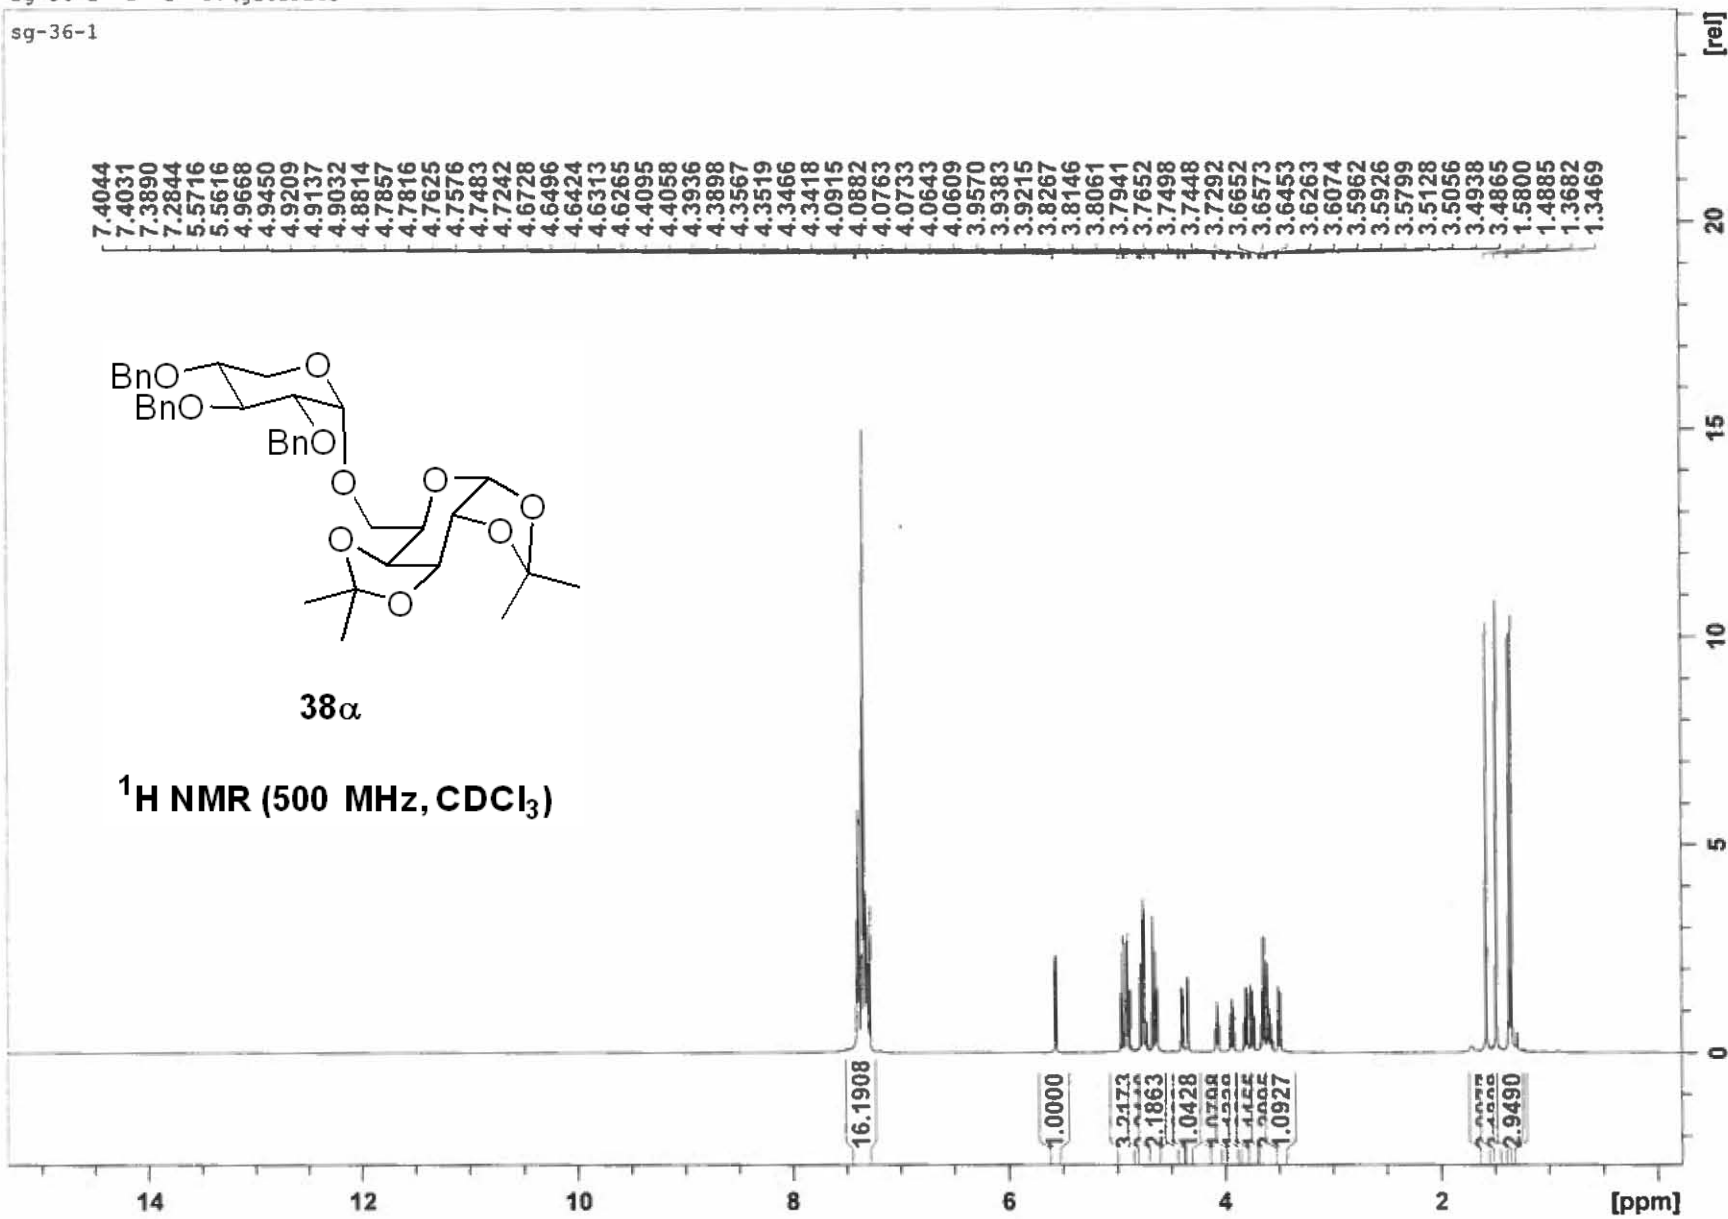

sgc-36-1

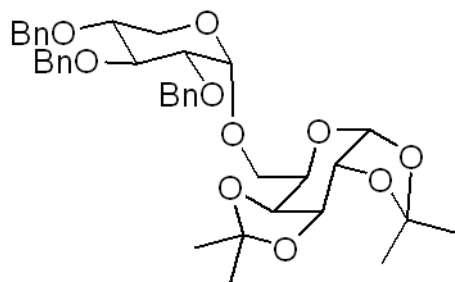

**38 $\alpha$**

**$^{13}\text{C}$  NMR (125 MHz,  $\text{CDCl}_3$ )**

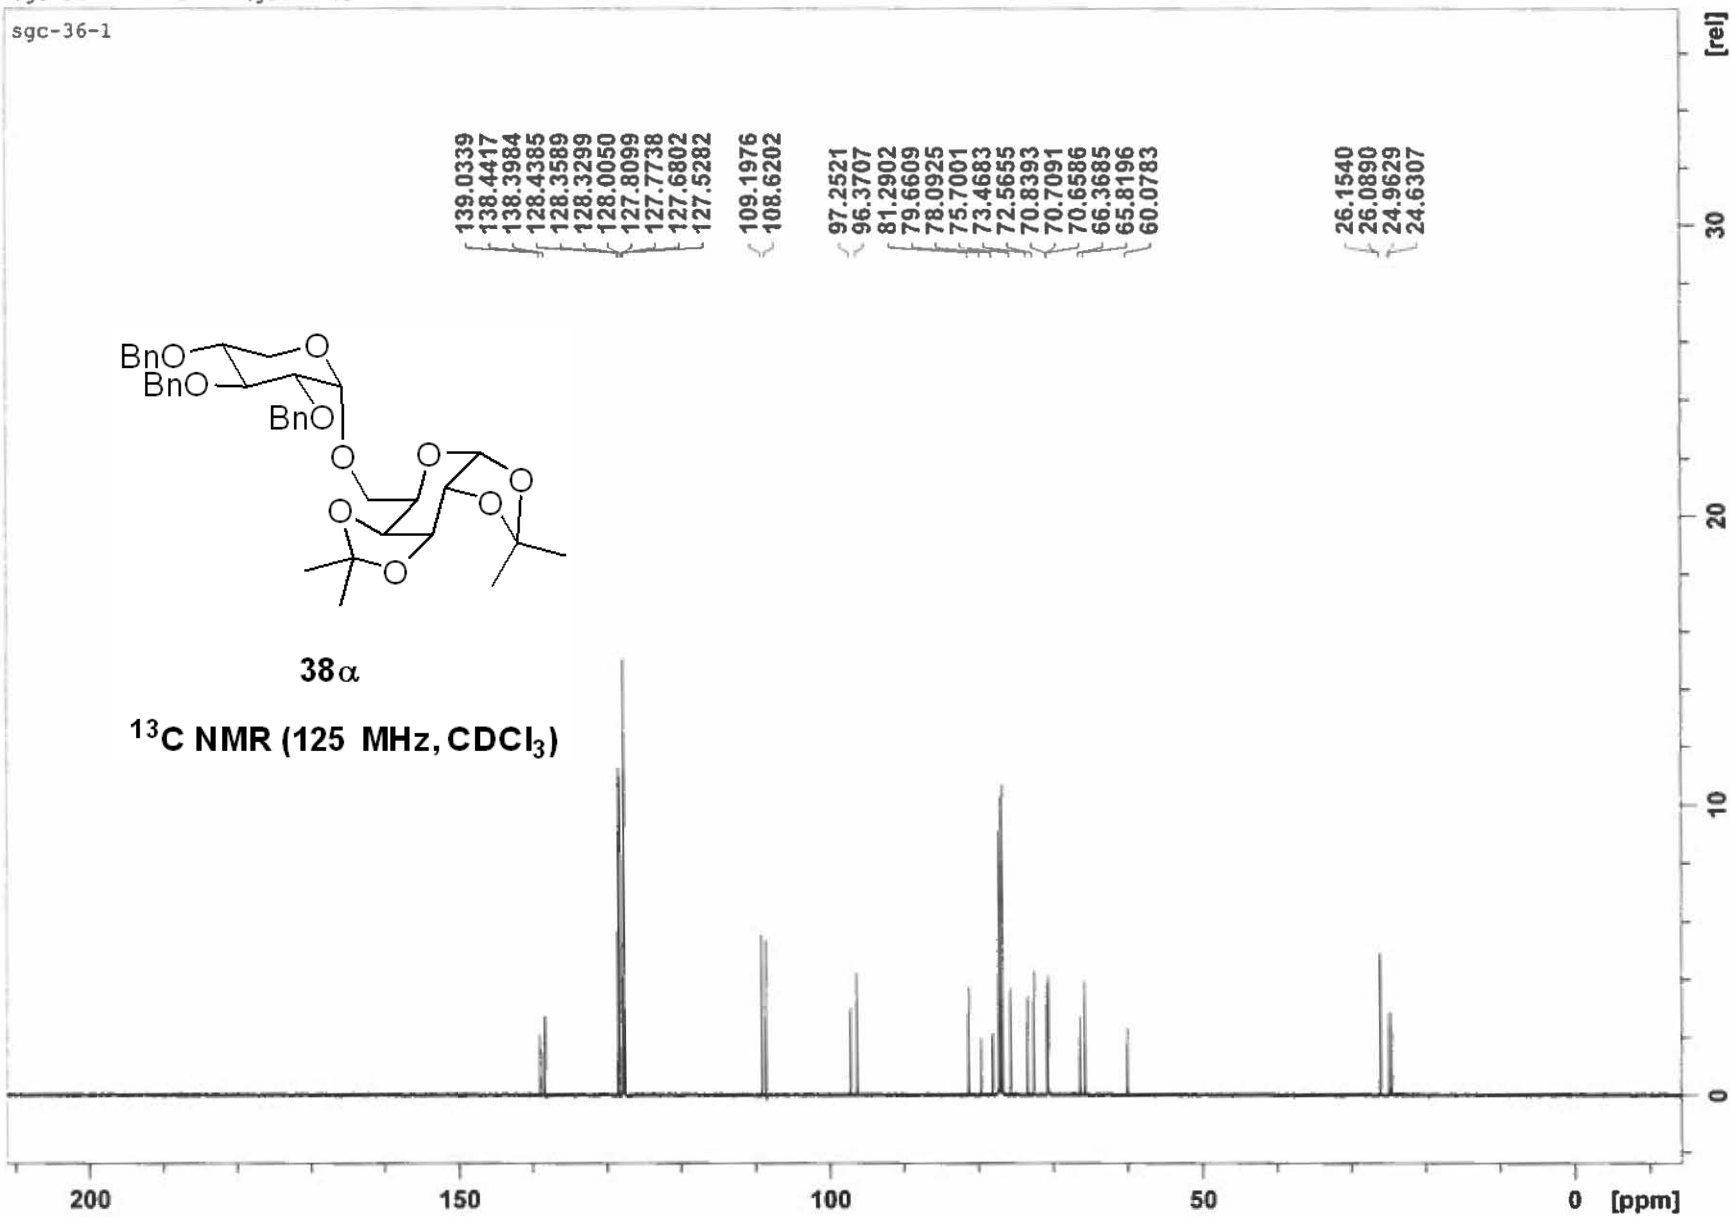



sg-36-2-1 1 1 J:\gz619263

sg-36-2-1

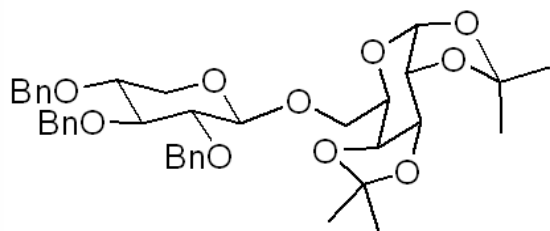

38 $\beta$

<sup>1</sup>H NMR (500 MHz, CDCl<sub>3</sub>)

7.4333  
7.4207  
7.4179  
7.2844  
5.5896  
5.5796  
5.0313  
5.0090  
4.9241  
4.9021  
4.8644  
4.8423  
4.7598  
4.7362  
4.7134  
4.6452  
4.6219  
4.6178  
4.6129  
4.6019  
4.5971  
4.4339  
4.4187  
4.3468  
4.3419  
4.3368  
4.3319  
4.2557  
4.2525  
4.2399  
4.2366  
4.0922  
4.0889  
4.0823  
4.0660  
4.0574  
3.9503  
3.9407  
3.9275  
3.9173  
3.7869  
3.7690  
3.7622  
3.6274  
3.6173  
3.6082  
3.6019  
3.5858  
3.5682  
3.4212  
3.4056  
3.3883  
3.2449  
3.2254  
3.2218  
3.2023  
1.5167  
1.4760  
1.3436  
1.3414

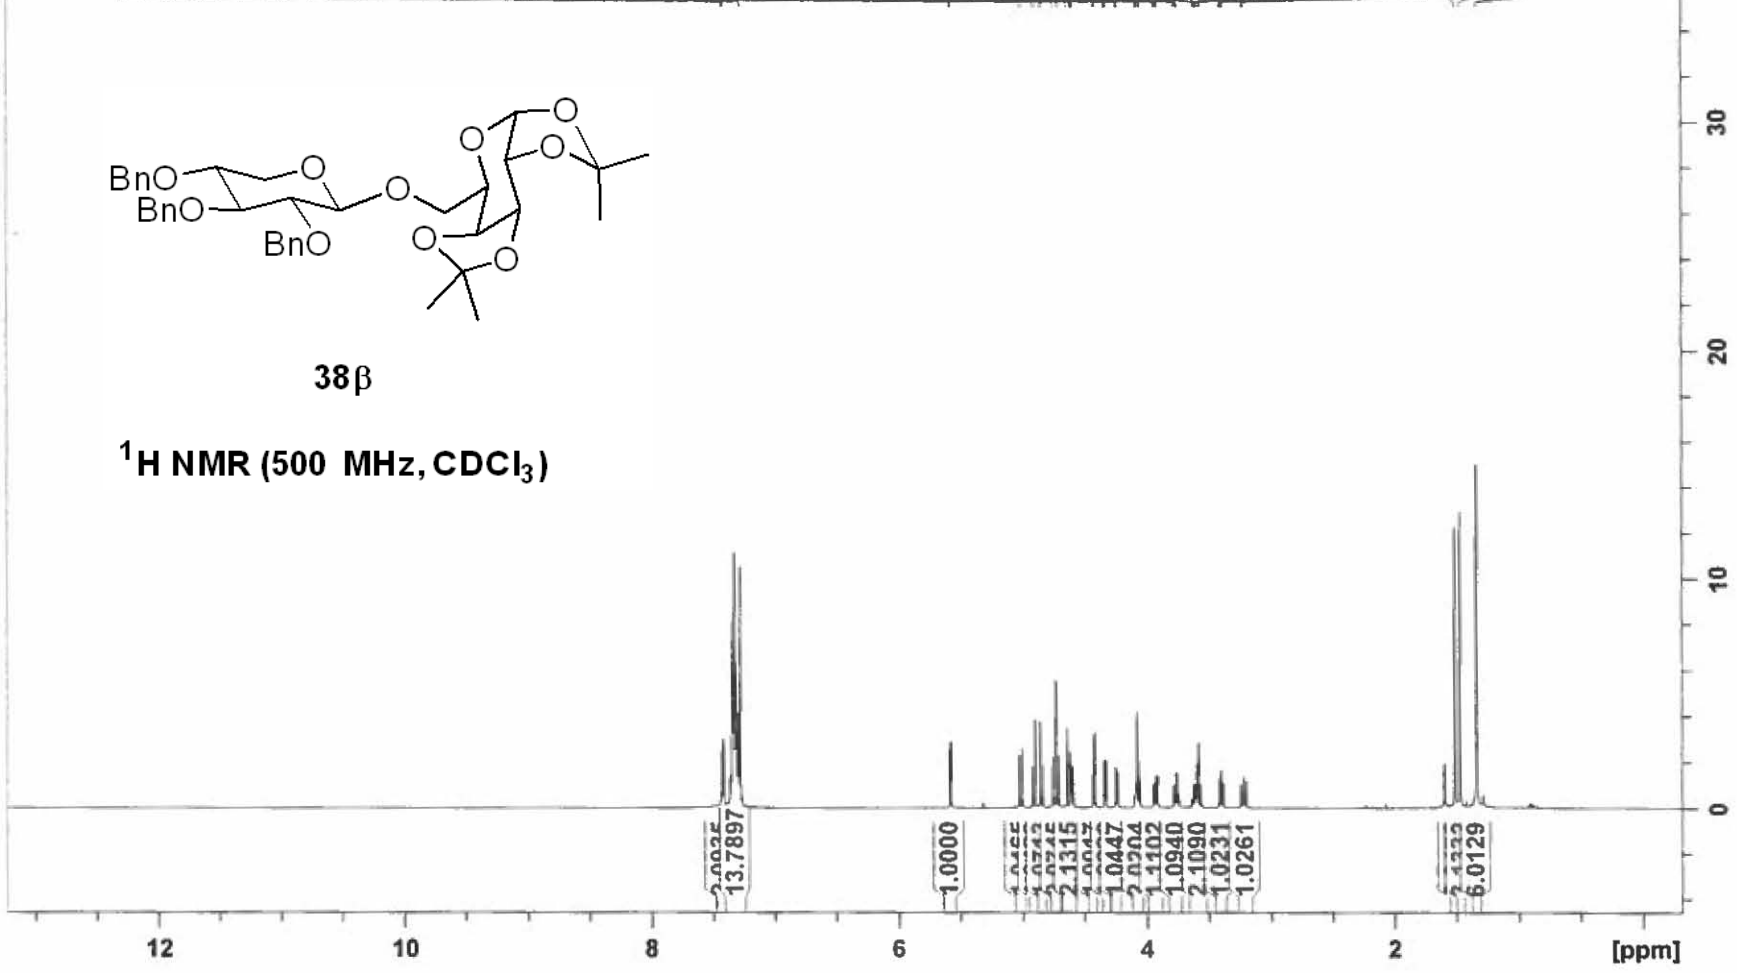

[rel]  
40  
30  
20  
10  
0  
[ppm]

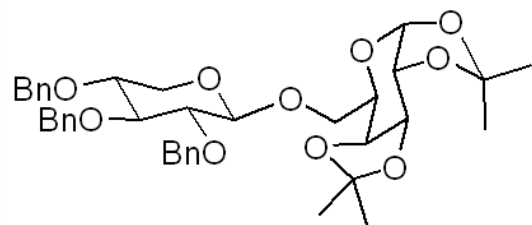

38β

 $^{13}\text{C}$  NMR (125 MHz,  $\text{CDCl}_3$ )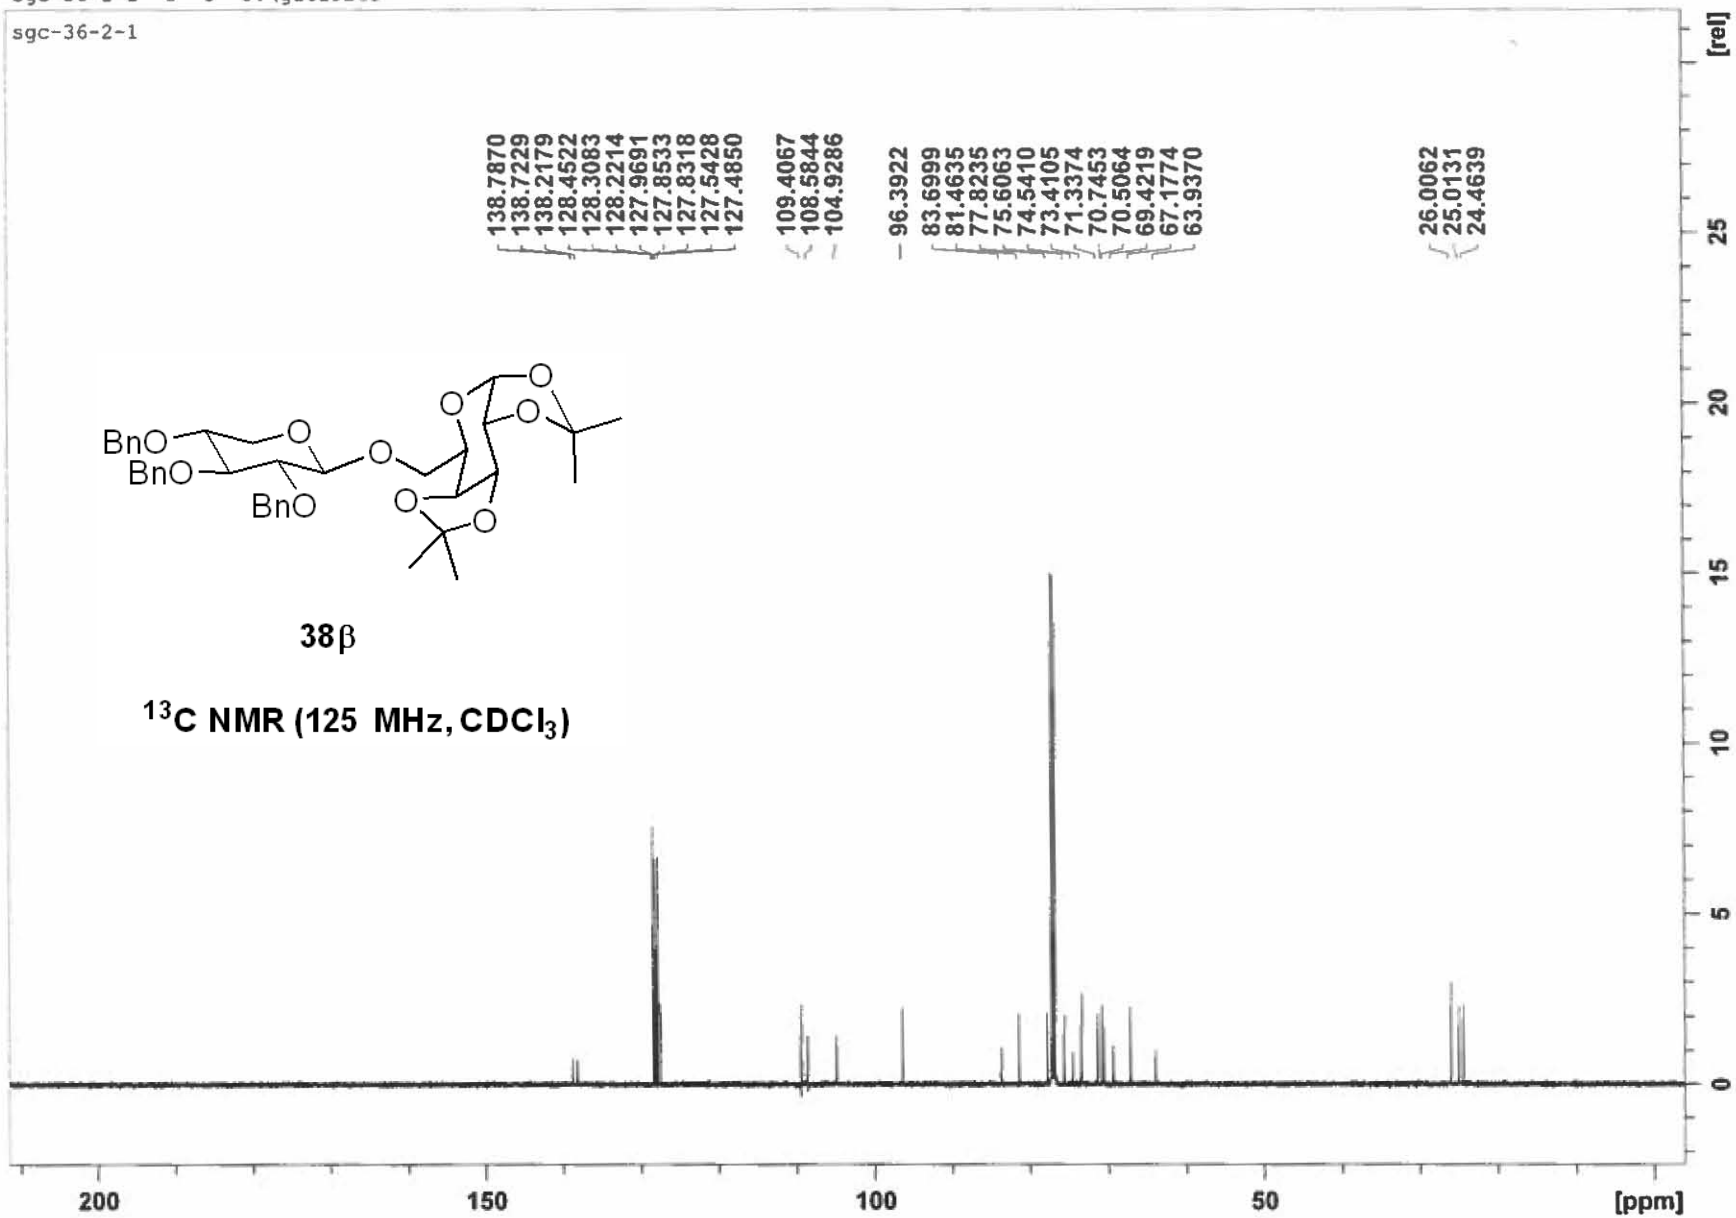

sg-38-1-1 1 1 J:\gz619263

sg-38-1-1

5.5381  
5.5280  
5.0299  
4.7951  
4.7879  
4.7833  
4.7762  
4.6430  
4.6312  
4.6230  
4.6181  
4.6072  
4.6023  
4.4096  
4.4009  
4.3972  
4.3939  
4.3885  
4.3850  
4.3814  
4.3726  
4.3285  
4.3236  
4.3184  
4.3136  
4.2277  
4.2239  
4.2119  
4.2081  
4.1156  
4.1030  
4.0982  
4.0857  
4.0582  
4.0494  
4.0408  
4.0320  
3.9903  
3.9833  
3.9744  
3.9673  
3.9613  
3.9576  
3.9479  
3.9443  
3.7638  
3.7504  
3.7427  
3.7293  
3.6639  
3.6505  
3.6429  
3.6294  
1.5423  
1.4657  
1.4489  
1.4457  
1.3801  
1.3457  
1.3329  
1.3260

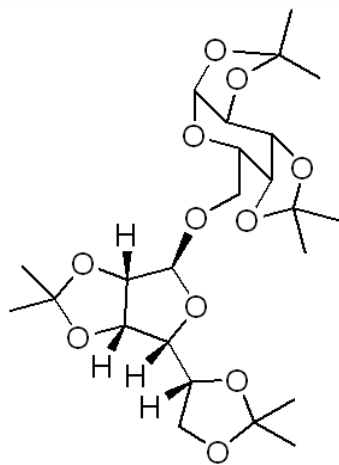

39

<sup>1</sup>H NMR (500 MHz, CDCl<sub>3</sub>)

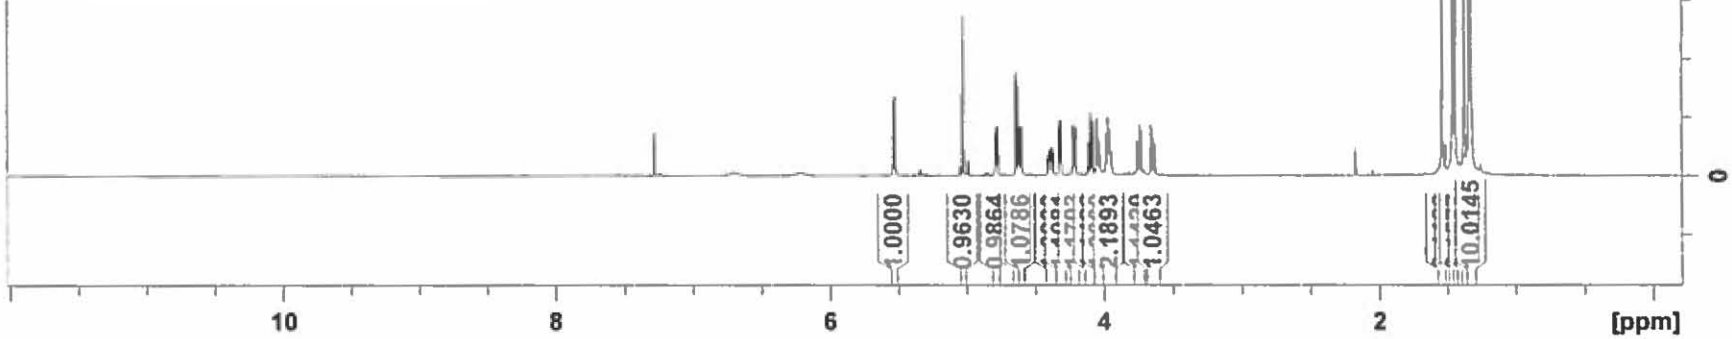

sgc-38-1

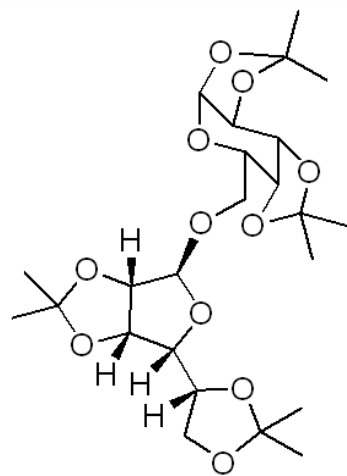

39

$^{13}\text{C}$  NMR (125 MHz,  $\text{CDCl}_3$ )

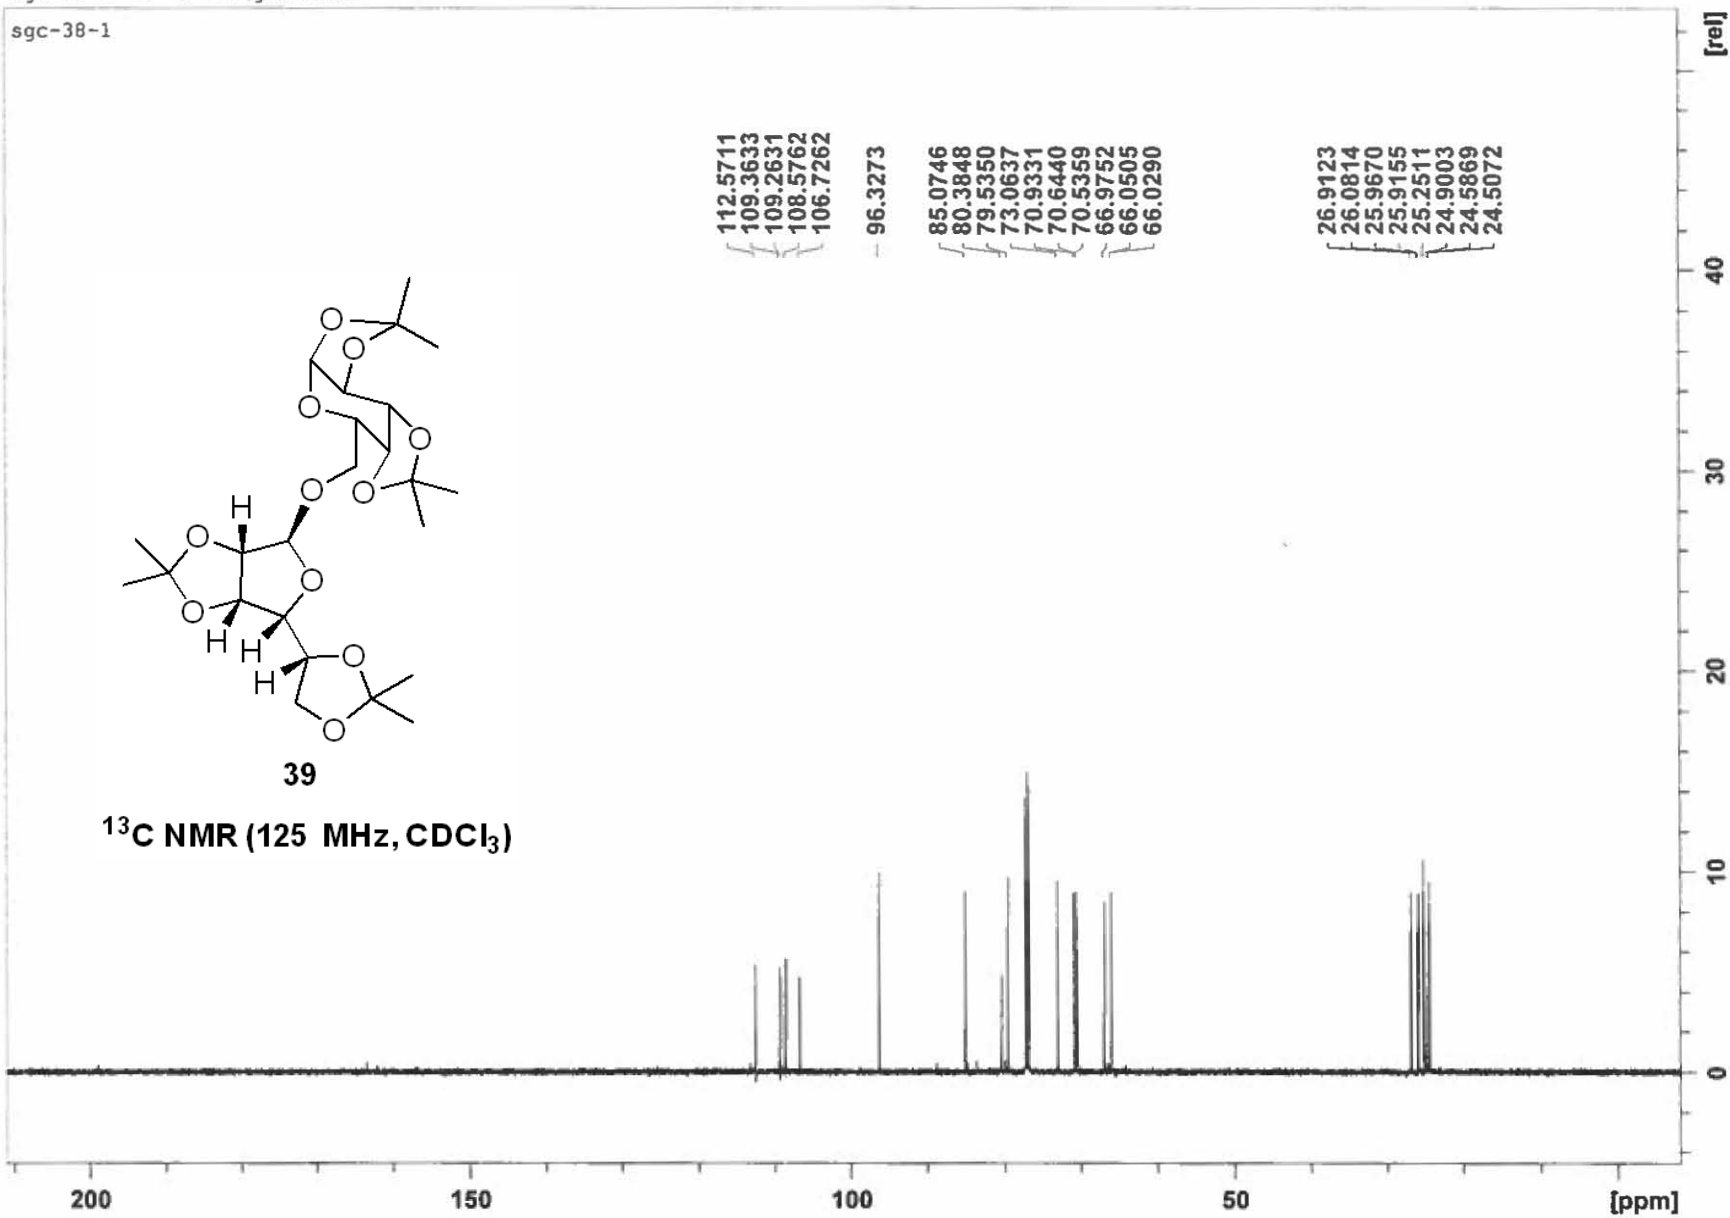

zgy-SG-12-2 1 1 /opt/topspin1.3 gz619263

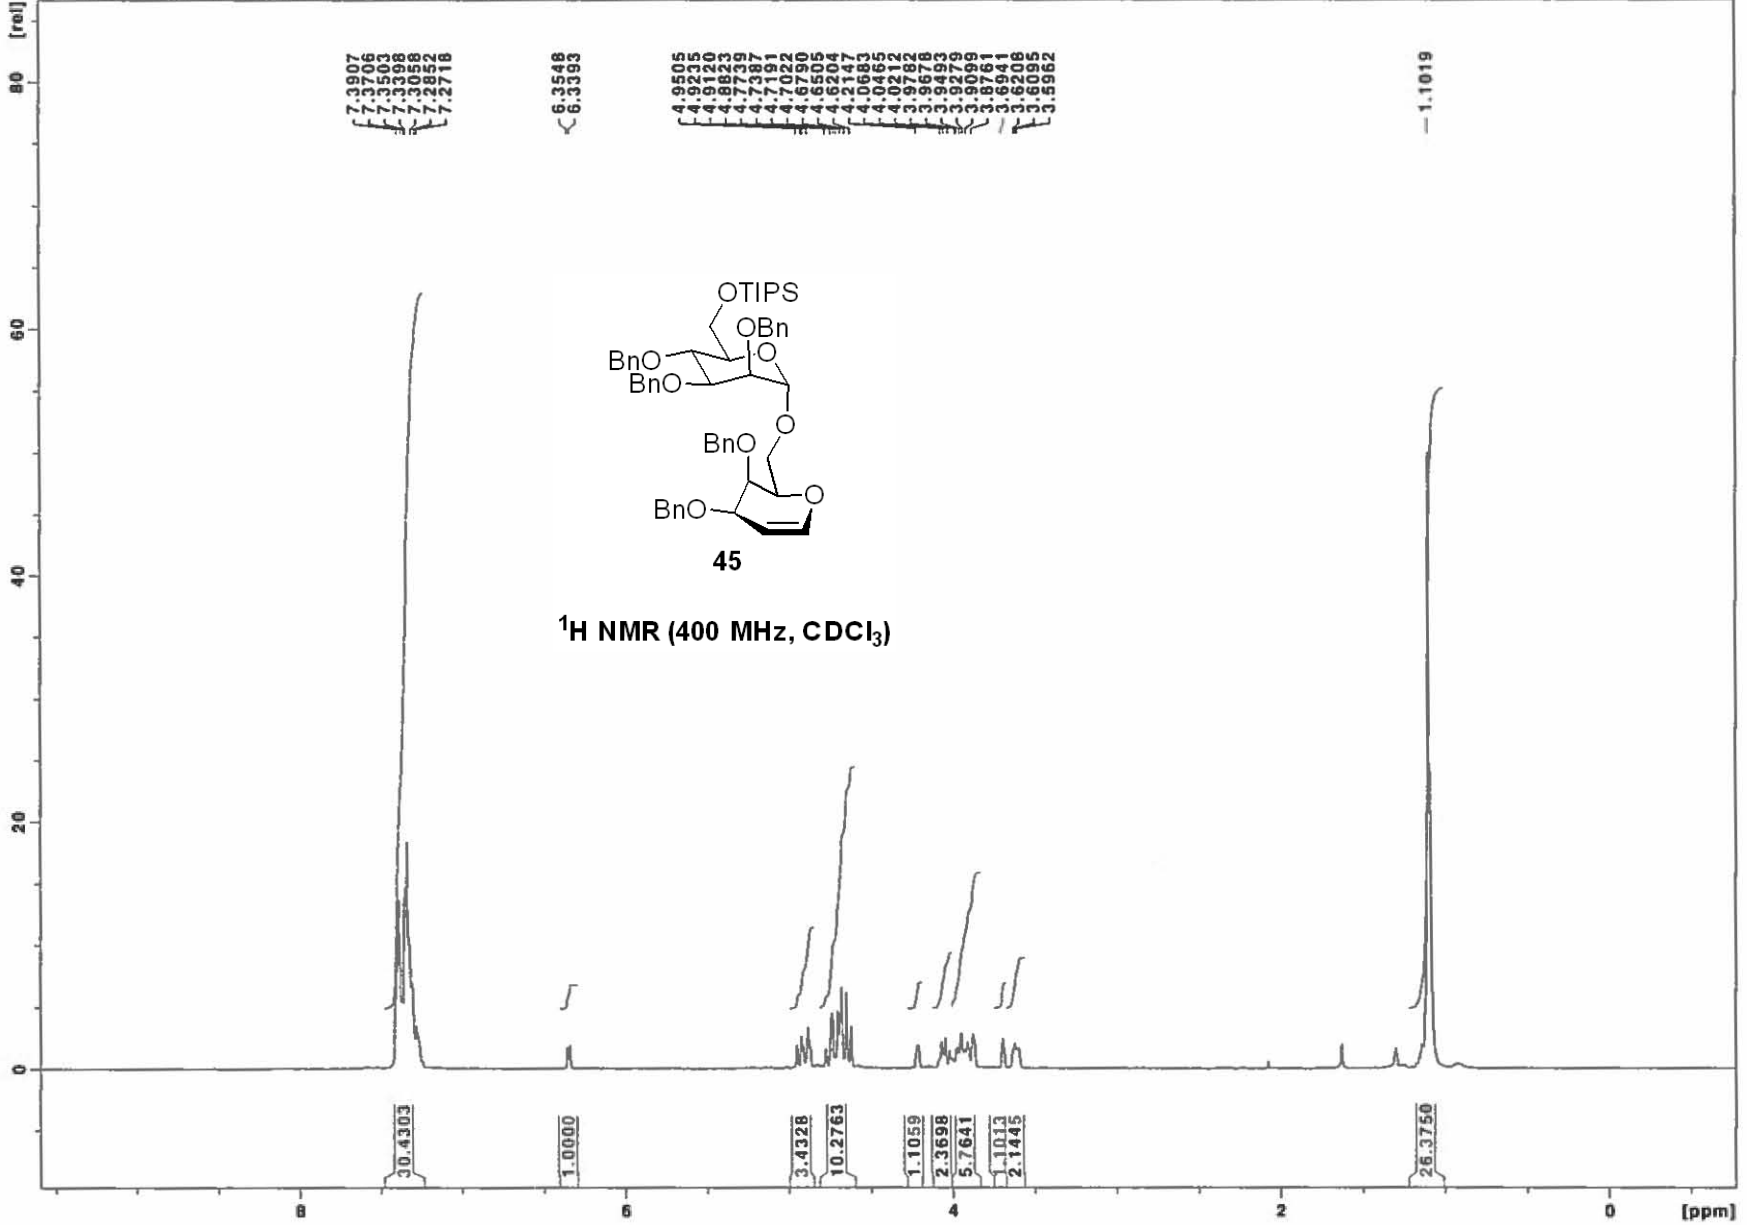

zgy-SGC-12-2 2 1 /opt/topspin1.3 gz619263

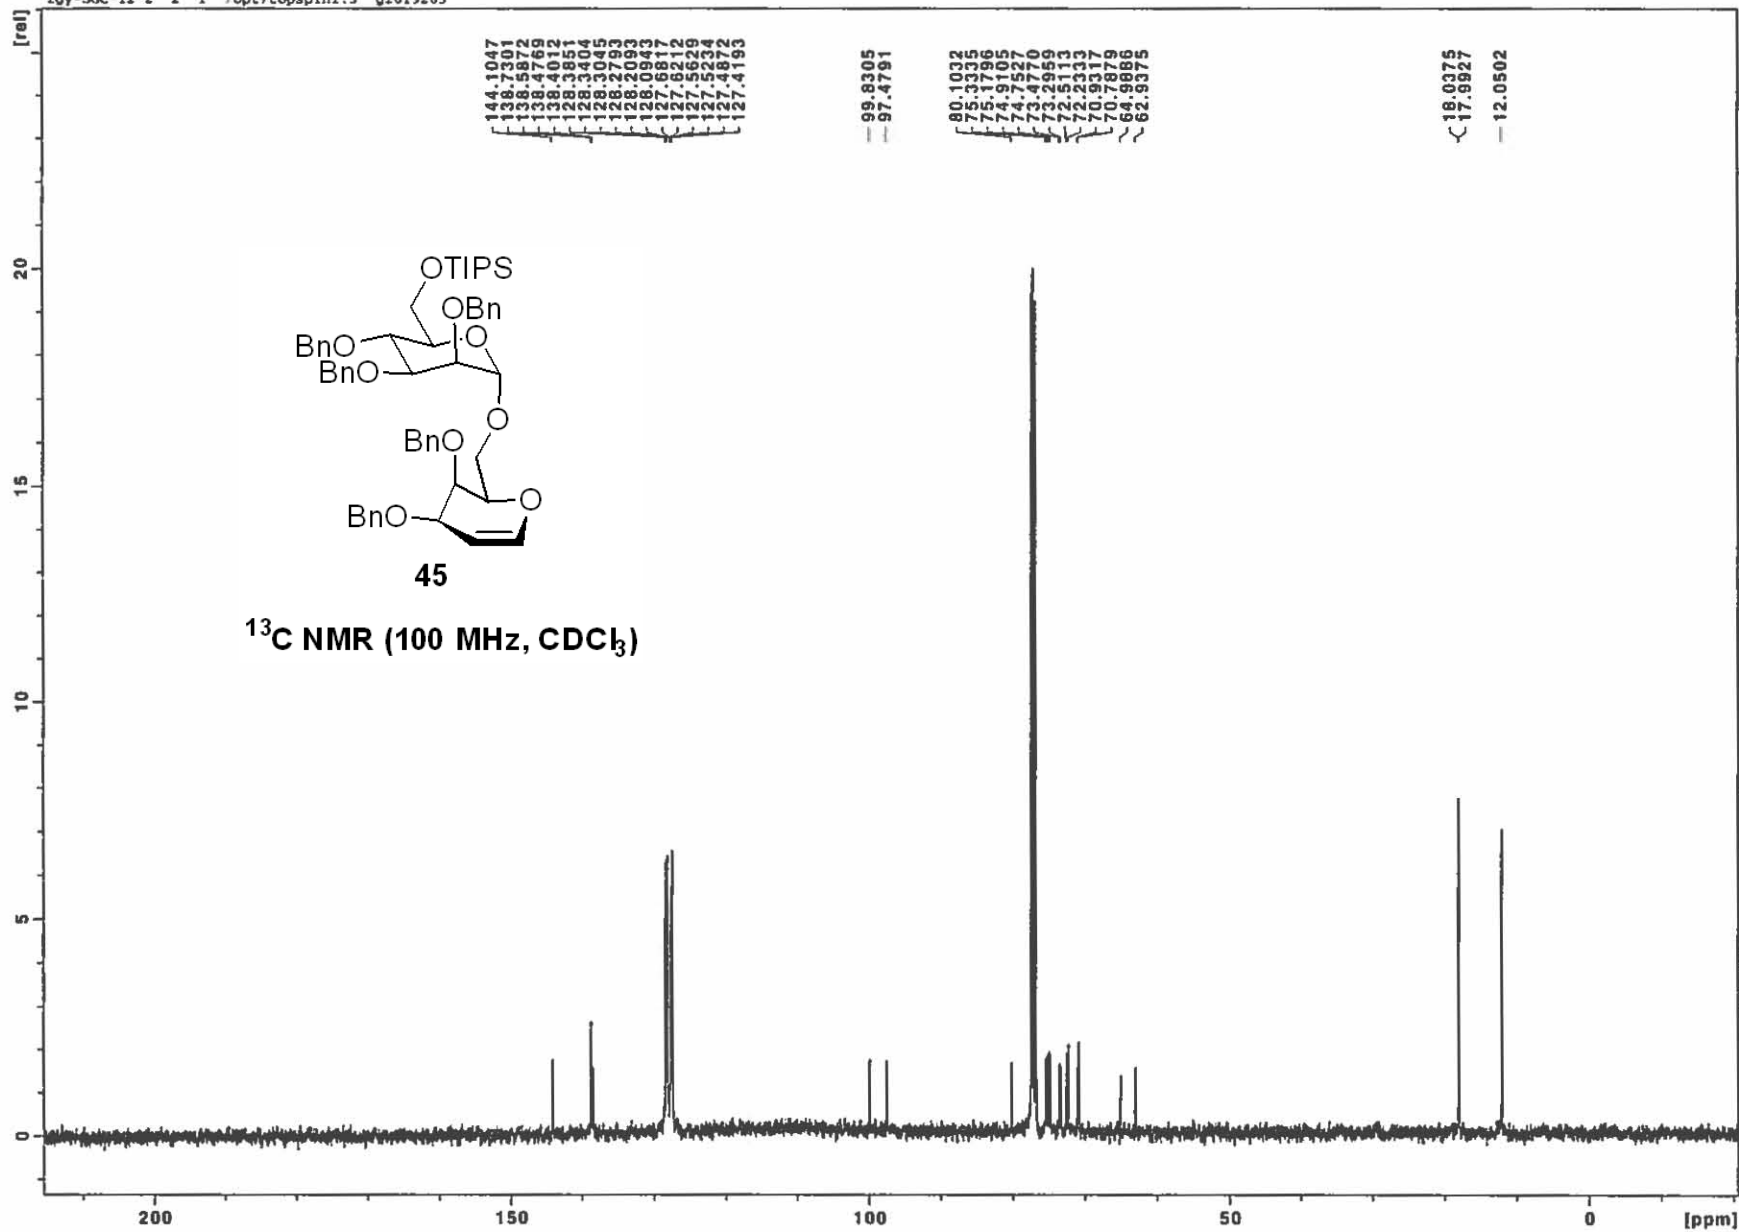

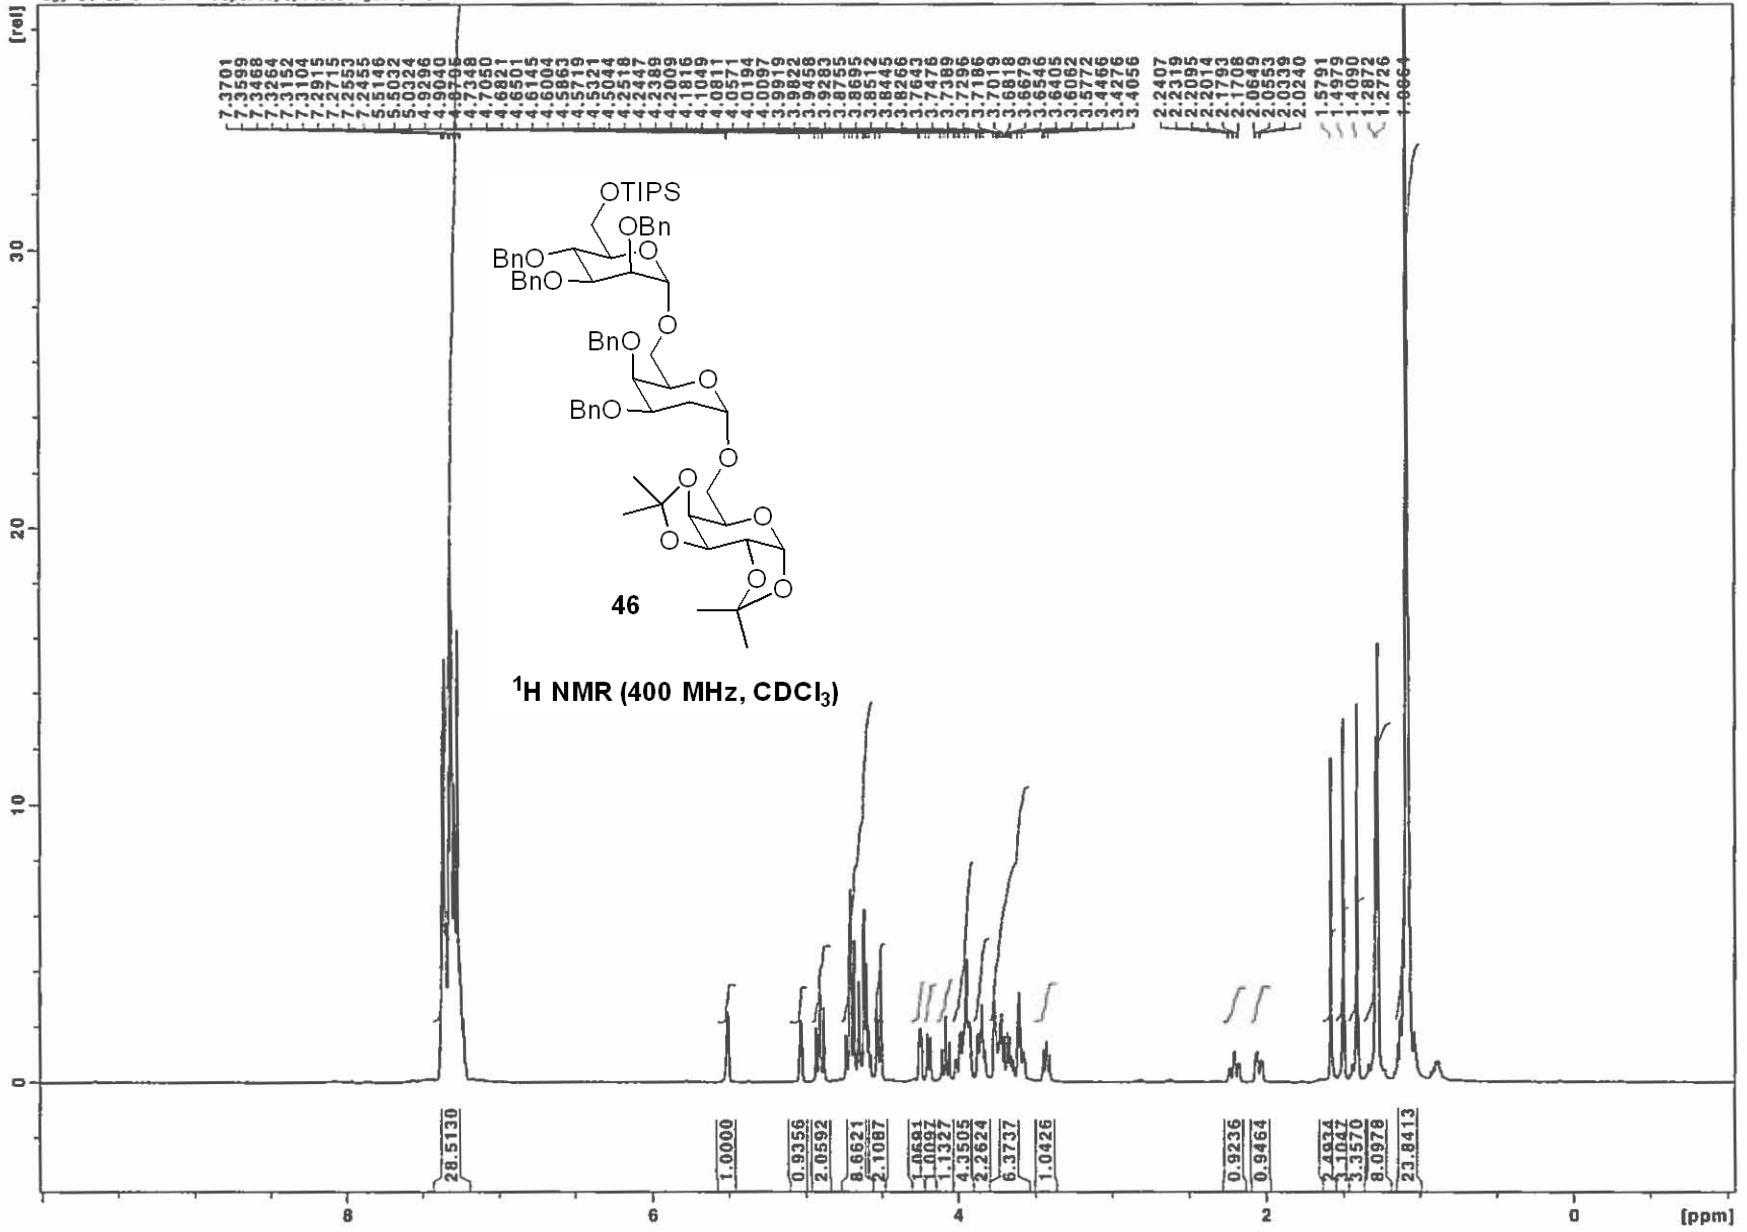

sgc-13 1 1 J:\gz619263

sgc-13

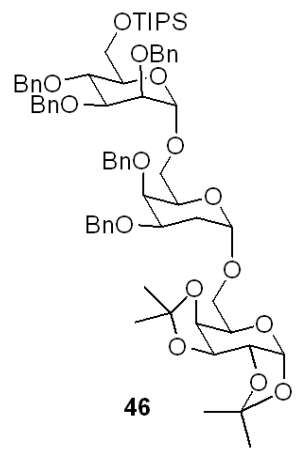

<sup>13</sup>C NMR (125 MHz, CDCl<sub>3</sub>)

138.9472  
138.9261  
138.8240  
138.6576  
138.6359  
128.4098  
128.3182  
128.3013  
128.2144  
128.1855  
128.0843  
128.0198  
127.7233  
127.5354  
127.5177  
127.4908  
127.4633  
127.3558  
127.2767  
109.3067  
108.4466  
97.3390  
96.8543  
96.3788  
80.1722  
75.6178  
75.1235  
74.8624  
74.6365  
74.2124  
73.3449  
72.9653  
72.4716  
71.1553  
70.7152  
70.5216  
70.4785  
69.3240  
65.6679  
65.5100  
65.1428  
62.8236

30.9291  
26.1395  
26.0173  
24.9006  
24.5653  
18.0648  
18.0143  
12.0634

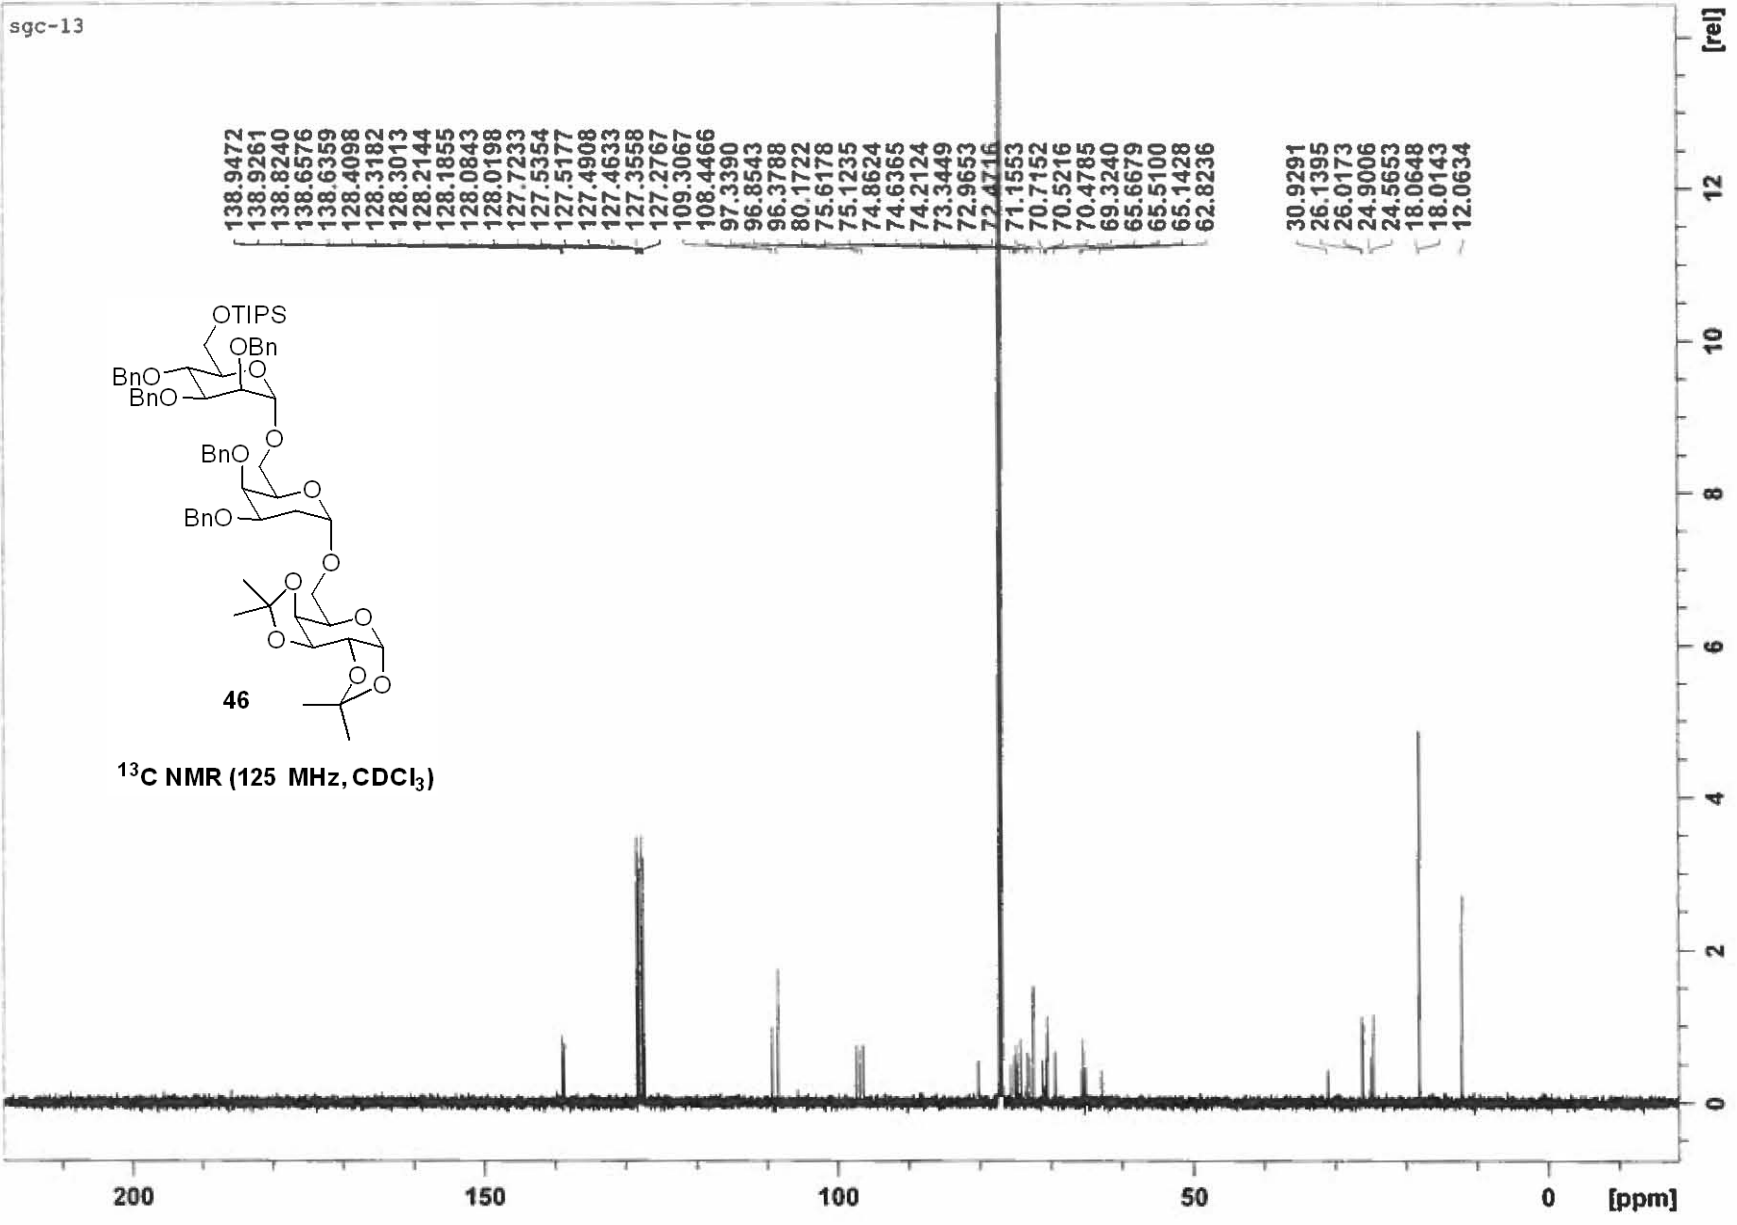



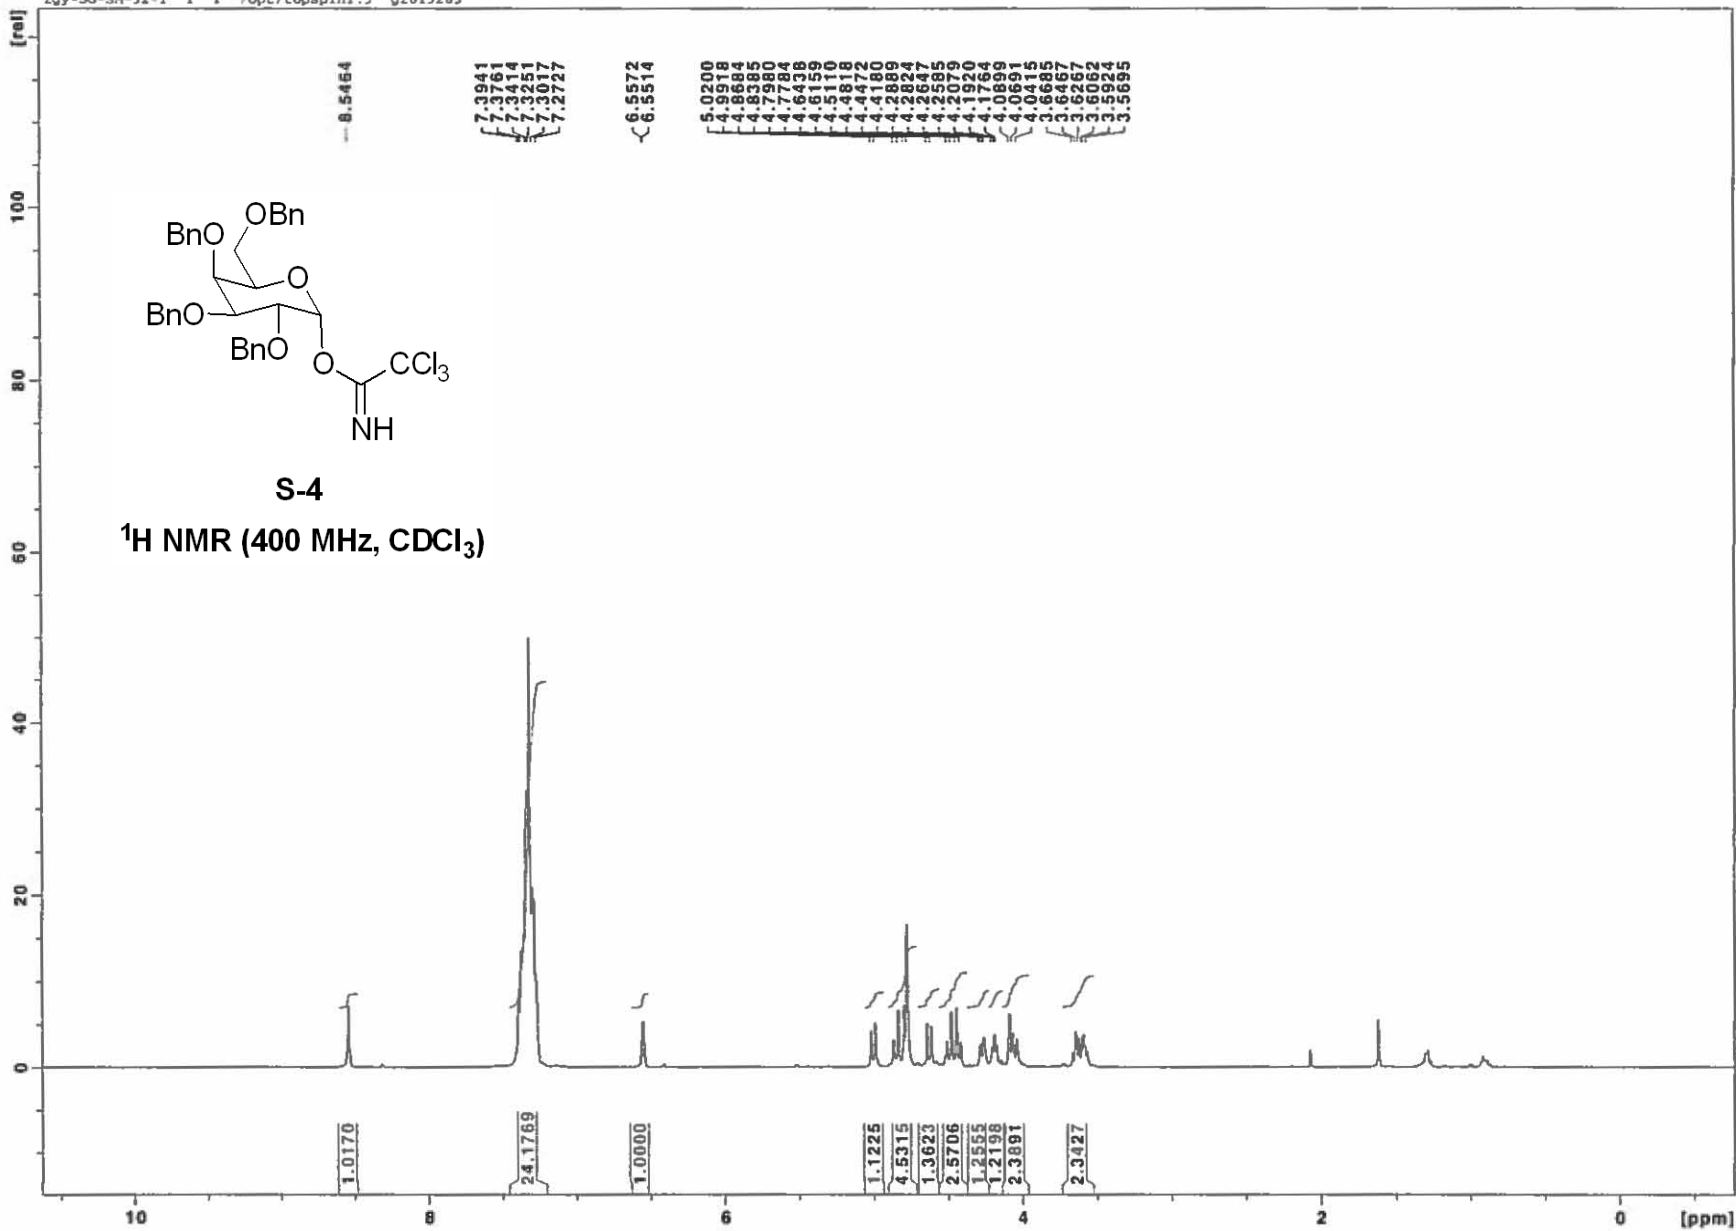

sgc-sm-32 1 1 J:\gz619263

sgc-sm-32

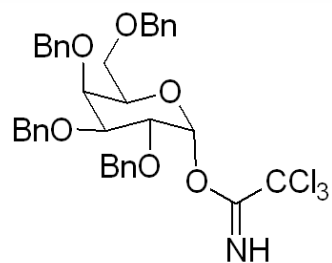

S-4

<sup>13</sup>C NMR (126 MHz, CDCl<sub>3</sub>)

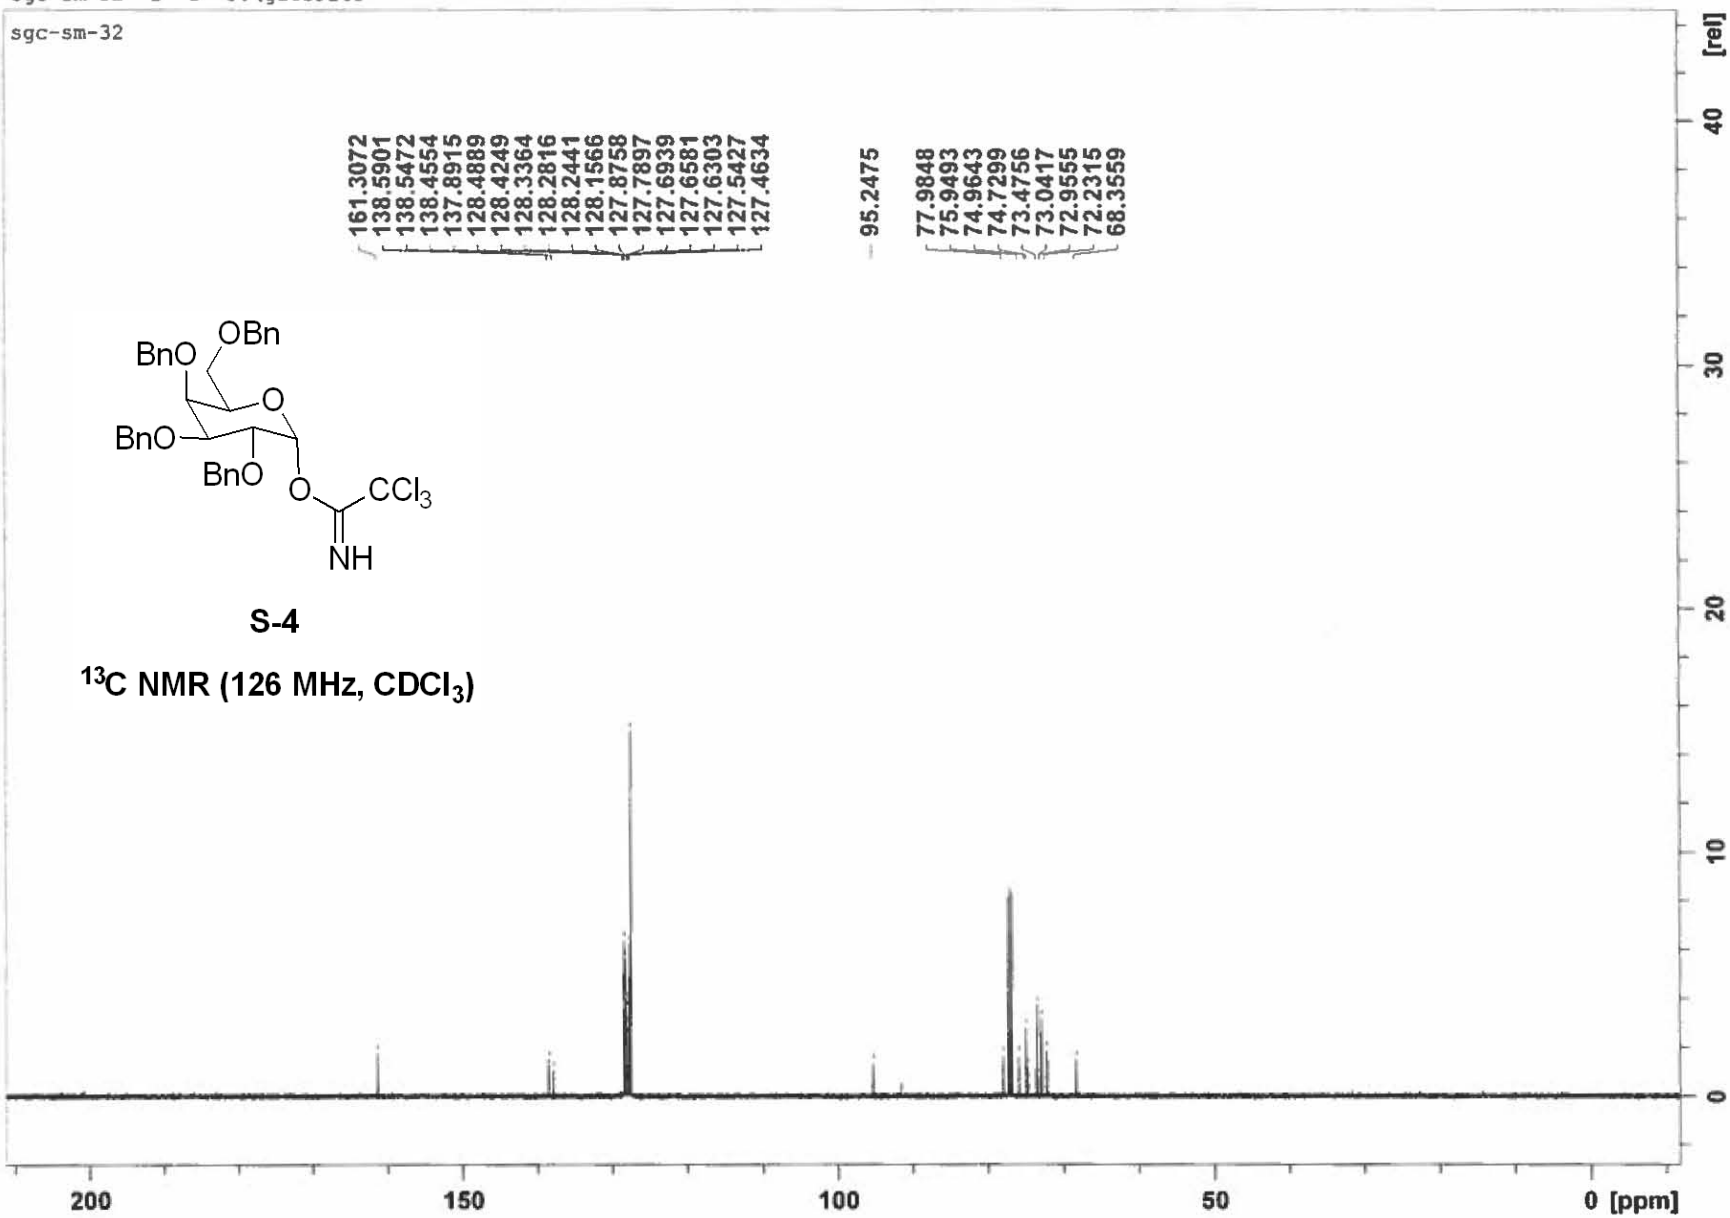

sg-sm-3226-1 1 1 J:\gz619263

sg-sm-3226

8.5408  
7.4519  
7.4387  
7.4375  
7.4362  
7.3863  
7.3756  
7.3725  
7.3666  
7.3581  
7.3468  
7.3447  
7.3328  
7.3226  
7.3198  
7.3181  
7.3155  
7.2844  
6.2854  
6.2817  
5.0065  
4.9850  
4.8003  
4.7045  
4.6832  
4.6611  
4.6377  
4.6139  
3.9538  
3.9412  
3.9384  
3.9342  
3.9322  
3.9219  
3.9198  
3.9134  
3.8944  
3.8903  
3.8882  
3.8840  
3.7616  
3.7427  
3.7239

1.3932  
1.3809

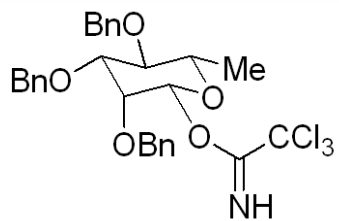

S-5

<sup>1</sup>H NMR (500 MHz, CDCl<sub>3</sub>)

0.9776

15.5835

1.0000

1.1798

2.3068

3.7659

3.4189

1.2295

3.2334

8

6

4

2

0

[ppm]

[ref]

60

40

20

0

sgc-sm-p3226 1 1 J:\gz619263

sgc-sm-p3226

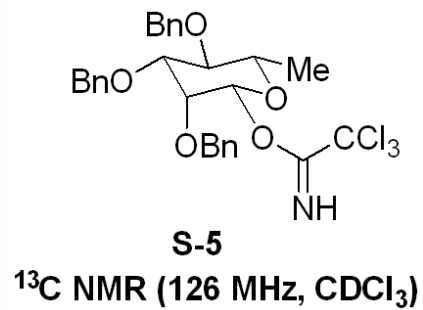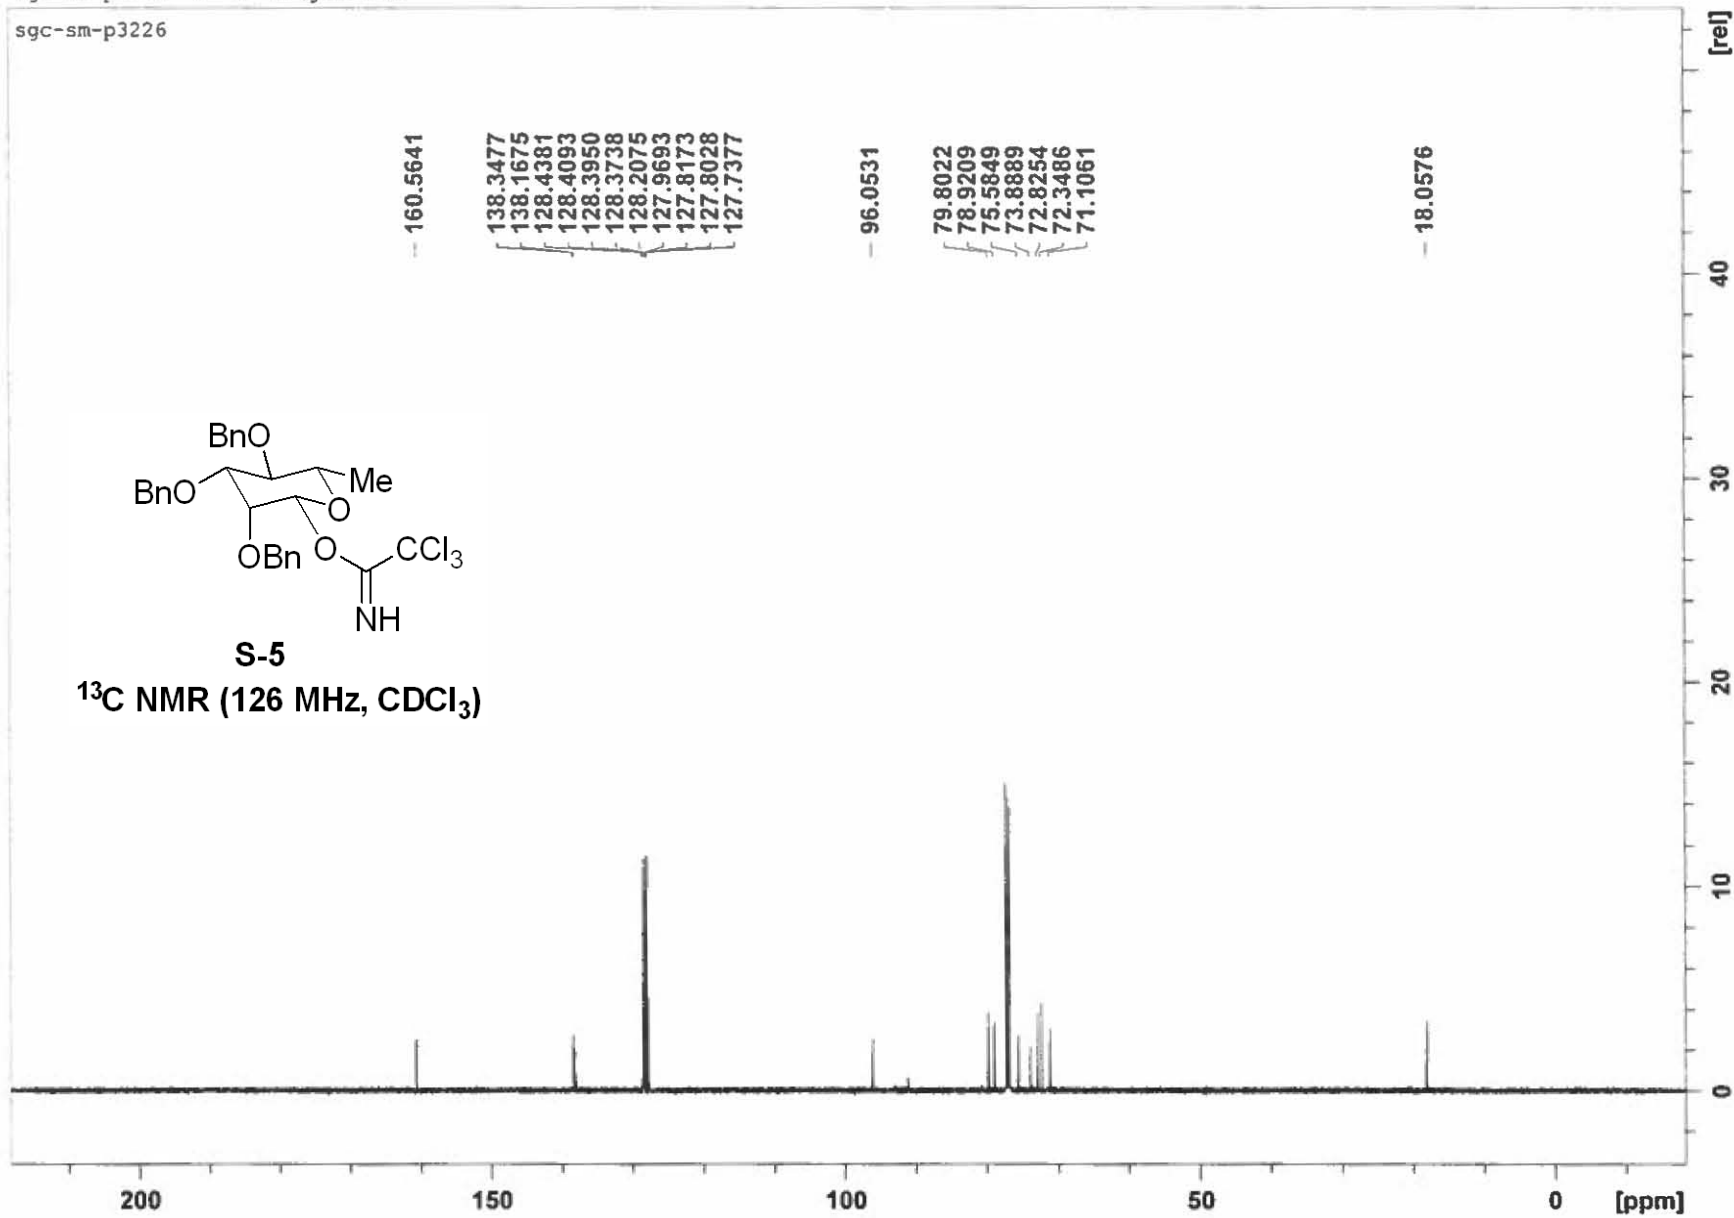

sg-sm-3227 1 1 J:\gz619263

sg-sm-3227

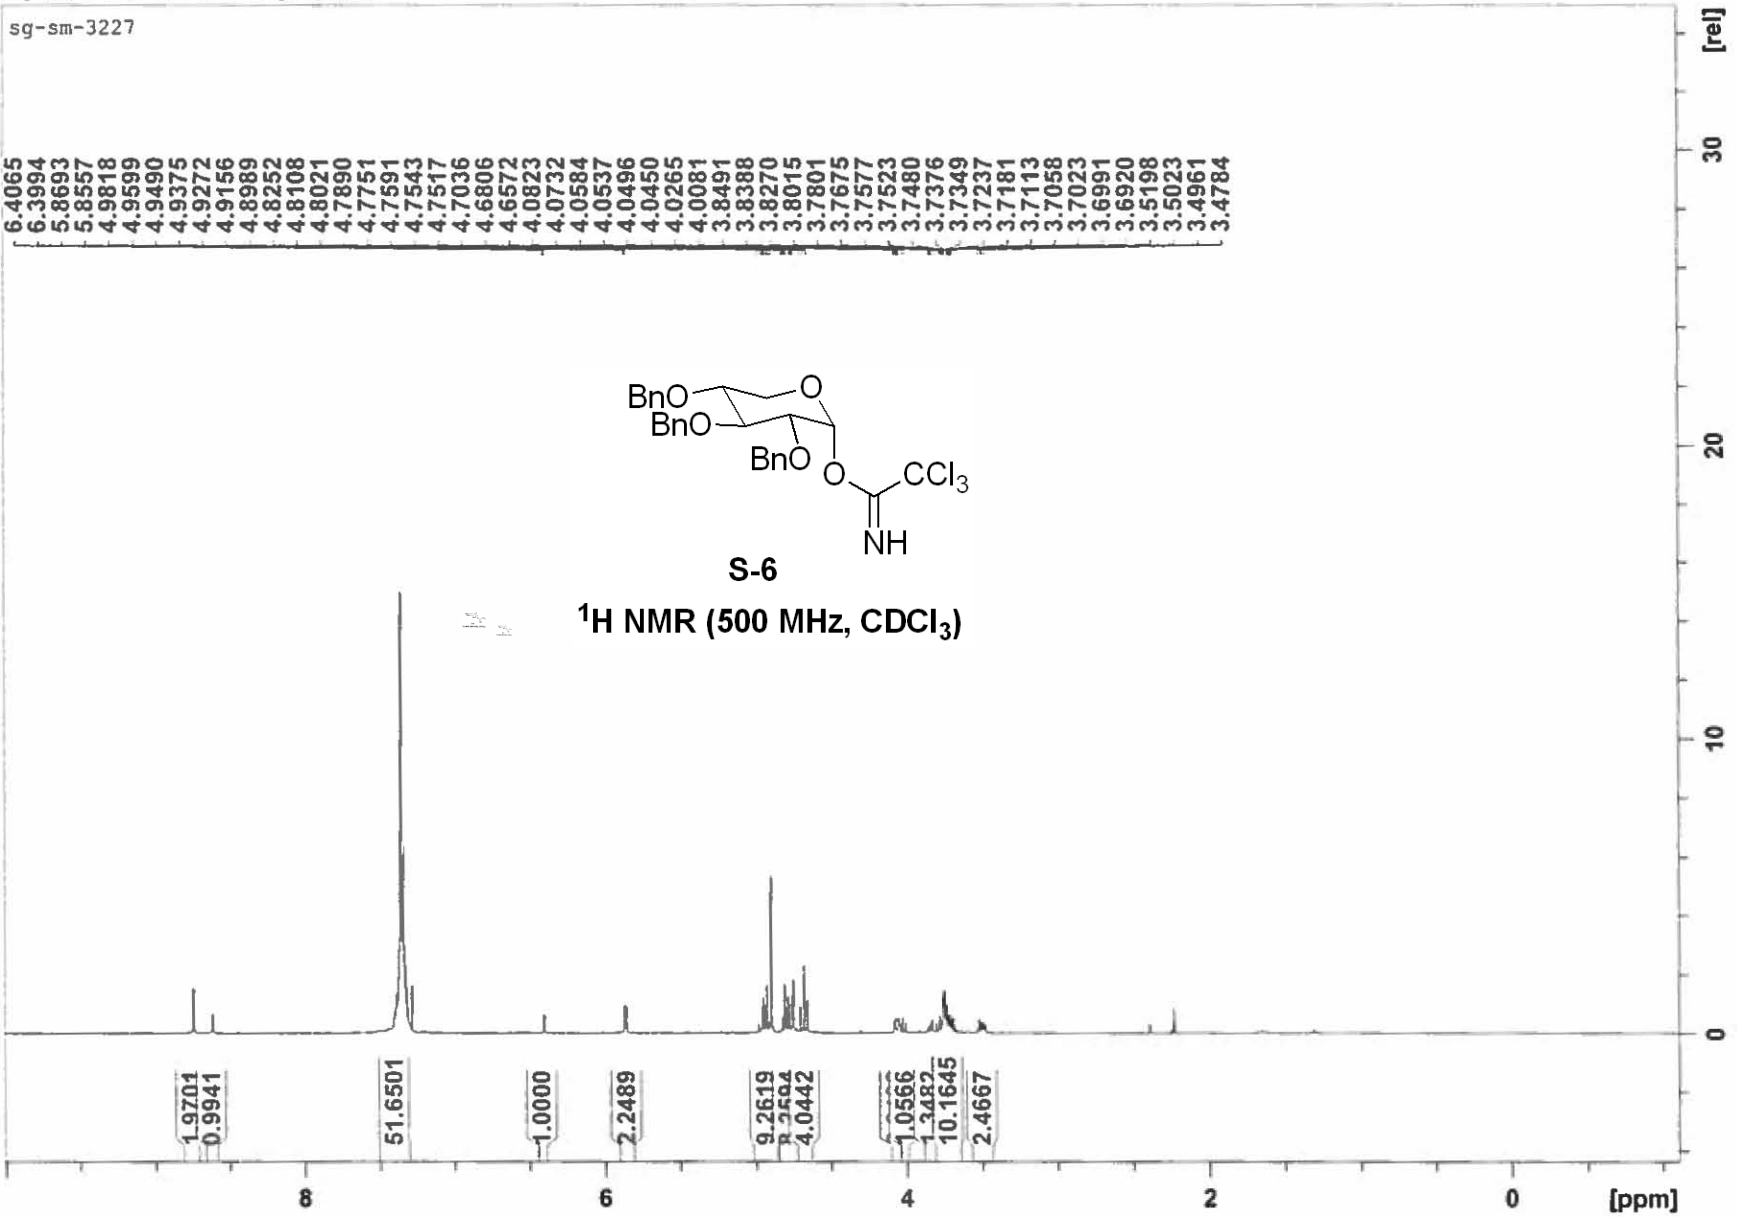

sgc-sm-p3227-1

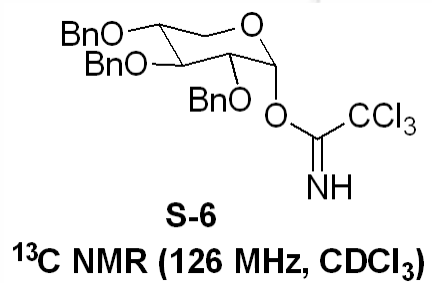

161.4957  
161.2214  
138.7014  
138.4778  
138.0948  
138.0303  
137.9653  
128.5252  
128.4016  
128.3601  
128.0769  
127.9708  
127.9146  
127.8172  
127.7523  
127.7016  
127.6513  
127.6153

98.8768  
94.3990  
83.0090  
80.8928  
80.1130  
79.1170  
75.7513  
75.4042  
74.9058  
73.7861  
73.1995  
73.0636  
64.5414  
62.5120

[rel]

40

30

20

10

0

200

150

100

50

0

[ppm]

sg-sm-38

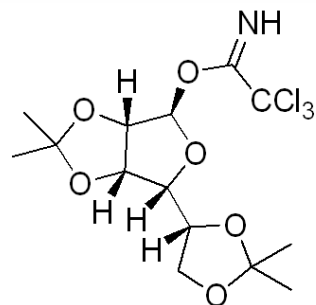

S-8

<sup>1</sup>H NMR (500 MHz, CDCl<sub>3</sub>)

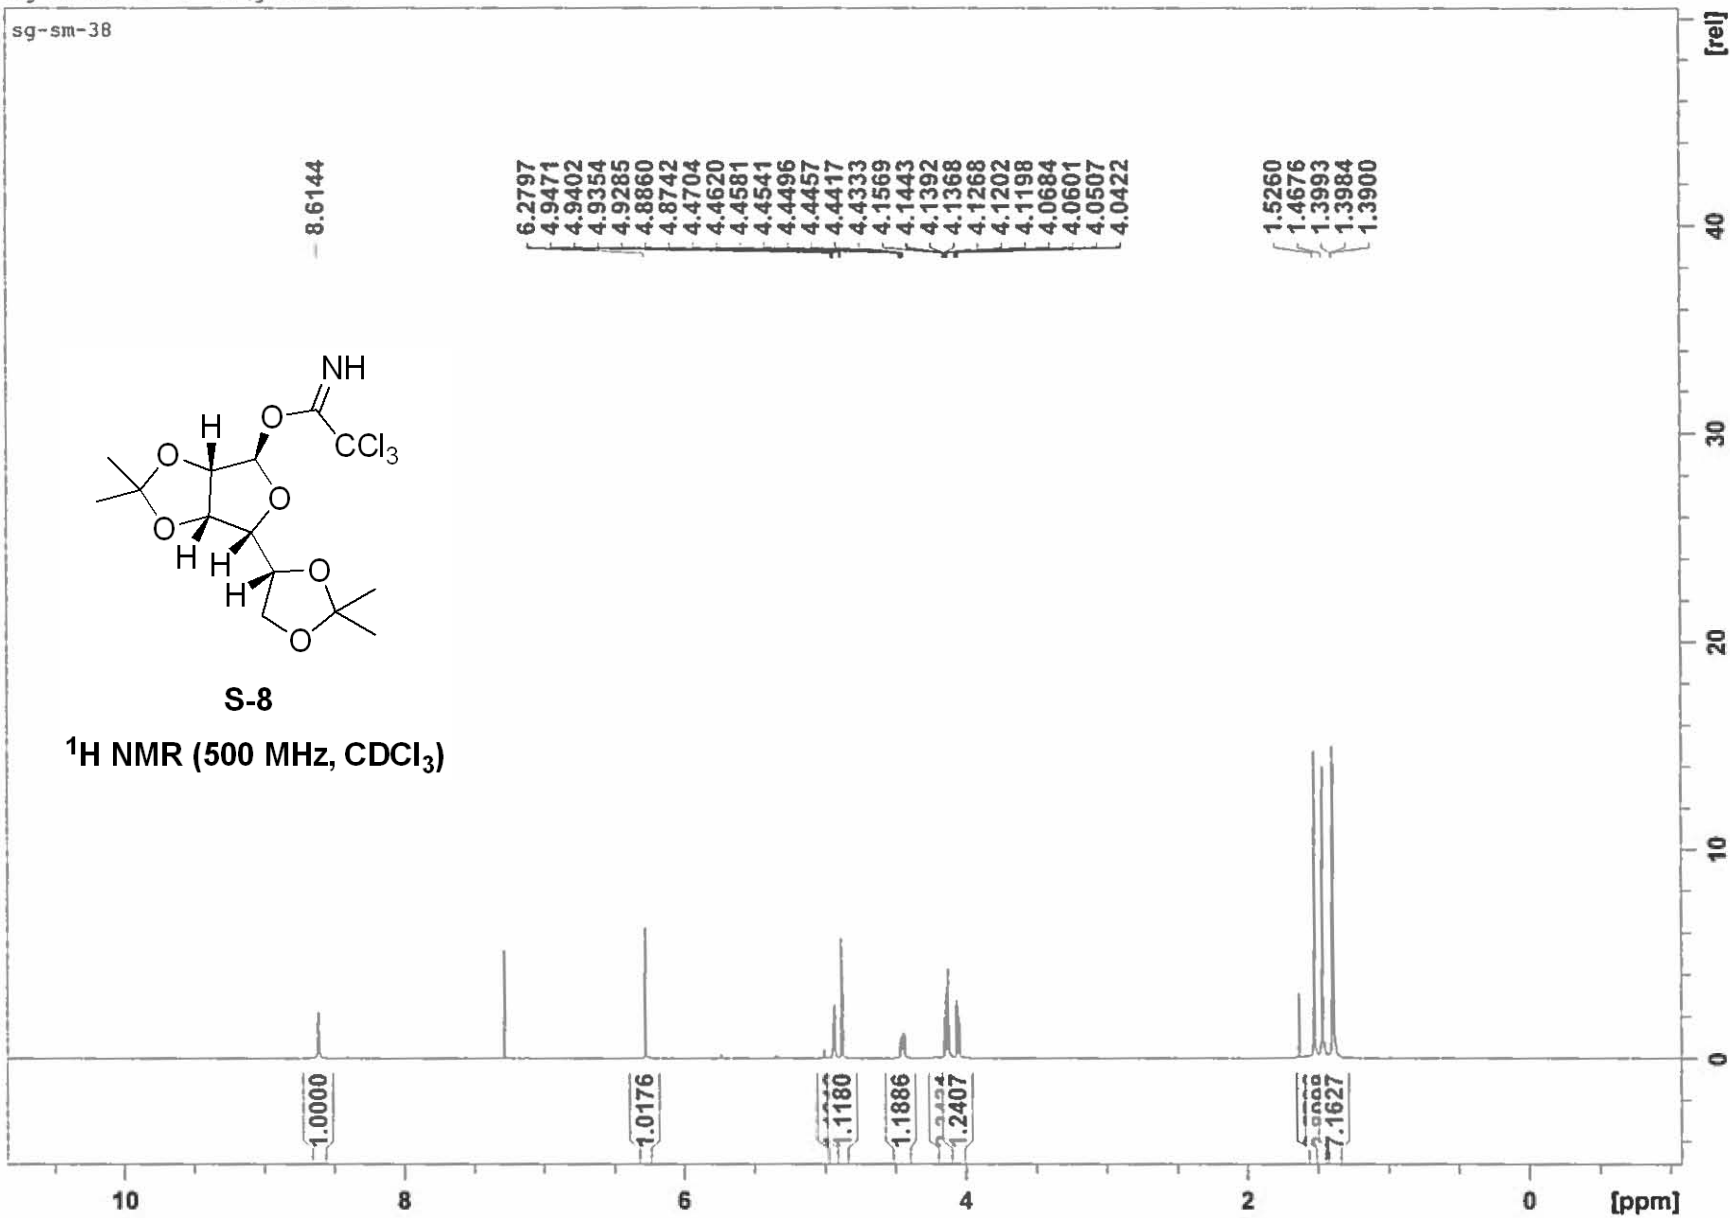

sgc-sm-38 1 1 J:\gz619263

sgc-sm-38

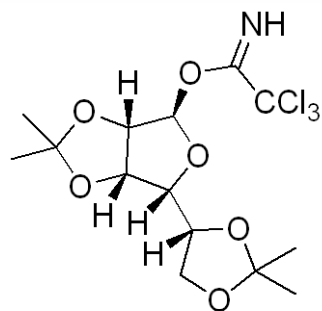

S-8

<sup>13</sup>C NMR (125 MHz, CDCl<sub>3</sub>)

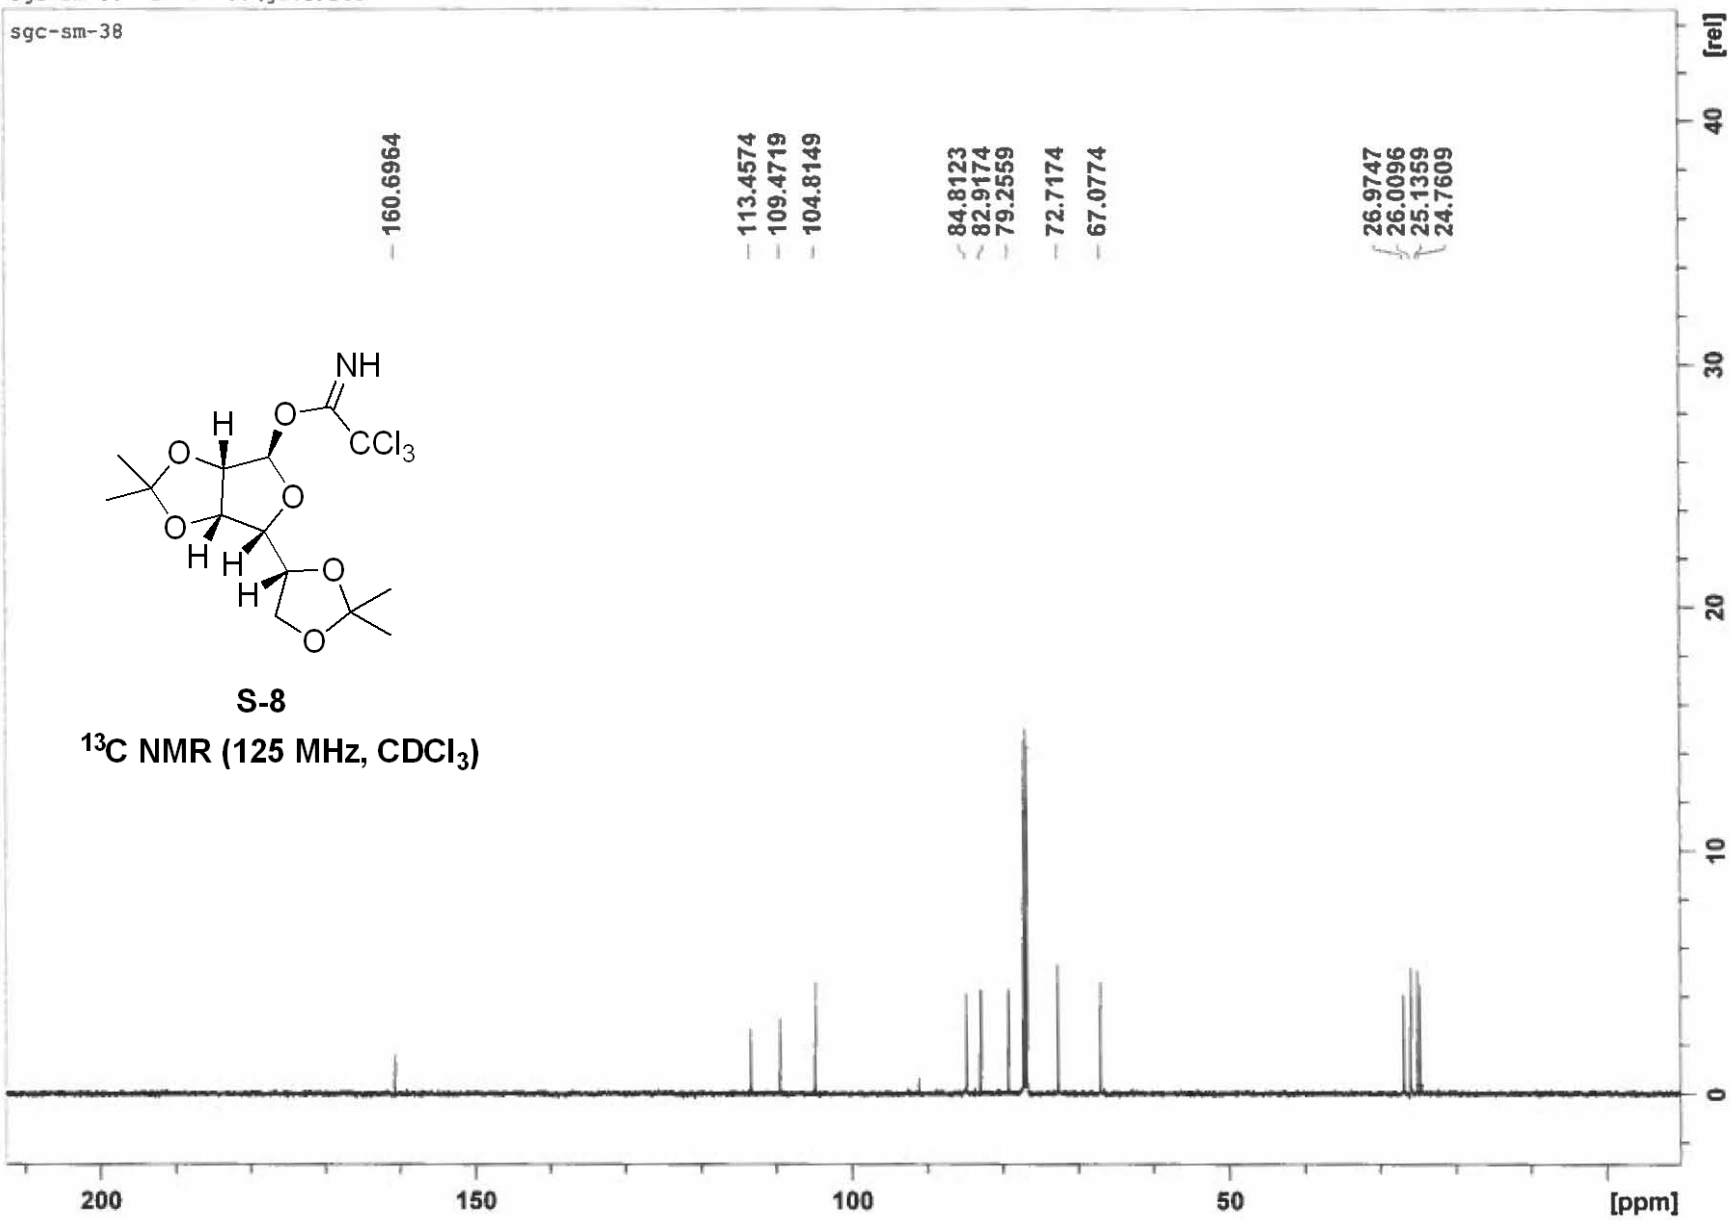

Supplement: d1cc04887b1.pdf [file d1cc04887b1.pdf]
